# Supplementary material for: Identification and Characterization of Antifungal Compounds Using a Saccharomyces cerevisiae Reporter Bioassay
Source: PLoS One. 2012 May 4;7(5):e36021. doi: 10.1371/journal.pone.0036021 (PMC3344848; doi:10.1371/journal.pone.0036021)
Supplement: File S1 — Transcriptional Profiles. The first worksheet contains the averaged and normalized fluorescence ratios for 1080 genes whose transcripts were modulated 2-fold in at least two conditions. The second worksheet contains the complete dataset from each individual hybridization. (XLS) [file pone.0036021.s005.xls]

## Sheet: Modulated Genes
File S1: Transcriptional Profiling of Candida albicans exposed to compounds 13 or 33
Treatment	Compound 13	Compound 13	Compound 13	Compound 33	Compound 33	Compound 33	Common	Description	GO biological process	GO molecular function	GO cellular component
Time (min)	20	40	60	20	40	60
orf19.5306	0.364714	0.51581	0.484694	0.858714	0.660354	0.855399		Predicted ORF in Assemblies 19, 20 and 21; possibly spurious ORF (Annotation Working Group prediction)
orf19.2075	0.355626	0.444796	0.407272	0.769771	0.749999	0.72197	DFG5	N-linked mannoprotein of cell wall and membrane; possible signal transducer; role in hyphal growth and HWP1 induction in alkaline pH; GPI modification predicted; dfg5 dcw1 double mutant is inviable; caspofungin-induced, fungal-specific	GO:0030448 hyphal growth | GO:0042493 response to drug | GO:0031505 fungal-type cell wall organization | GO:0007117 budding cell bud growth | GO:0007124 pseudohyphal growth | GO:0009272 fungal-type cell wall biogenesis |		GO:0009986 cell surface | GO:0005886 plasma membrane | GO:0009277 fungal-type cell wall | GO:0046658 anchored to plasma membrane |
orf19.2583.2	0.361508	0.38087	0.338952	0.627553	0.595616	0.915675		Pseudogene; formerly an ORF Predicted by Annotation Working Group	GO:0006790 sulfur metabolic process |	GO:0015198 oligopeptide transporter activity |
orf19.5576	0.381454	0.311081	0.403188	0.582758	0.739699	0.935172		Protein similar to S. cerevisiae Ydr531wp; transposon mutation affects filamentous growth; downregulated in core stress response	GO:0030447 filamentous growth | GO:0015937 coenzyme A biosynthetic process |	GO:0004594 pantothenate kinase activity |	GO:0005634 nucleus | GO:0005737 cytoplasm |
orf19.260	0.274753	0.268041	0.336128	0.599627	0.617957	0.860798	SLD1	Sphingolipid delta-8 desaturase, catalyzes desaturation at carbon-8 in the long-chain base moiety of ceramides during glucosylceramide synthesis	GO:0006665 sphingolipid metabolic process | GO:0030448 hyphal growth | GO:0007009 plasma membrane organization |	GO:0016705 oxidoreductase activity, acting on paired donors, with incorporation or reduction of molecular oxygen |
orf19.6082	0.449529	0.458116	0.516585	0.699565	0.720289	0.795695		Predicted ORF in Assemblies 19, 20 and 21	GO:0034394 protein localization at cell surface | GO:0006457 protein folding |	GO:0051082 unfolded protein binding |	GO:0030176 integral to endoplasmic reticulum membrane | GO:0005741 mitochondrial outer membrane | GO:0005886 plasma membrane |
orf19.6656	0.316219	0.405469	0.444213	0.550887	0.605075	1.04254	DUR3	Putative protein of unknown function, transcription is upregulated in clinical isolates from HIV+ patients with oral candidiasis; alkaline downregulated; amphotericin B induced; shows colony morphology-related gene regulation by Ssn6p	GO:0015840 urea transport |	GO:0015204 urea transmembrane transporter activity |	GO:0005886 plasma membrane |
orf19.7445	0.384653	0.366894	0.551453	0.683469	0.827252	0.908713		Predicted ORF in Assemblies 19, 20 and 21	GO:0016192 vesicle-mediated transport |		GO:0019898 extrinsic to membrane | GO:0016023 cytoplasmic membrane-bounded vesicle |
orf19.4048	0.235773	0.202724	0.393453	0.353194	0.58131	0.770272	DES1	Putative delta-4 sphingolipid desaturase	GO:0006665 sphingolipid metabolic process |	GO:0042284 sphingolipid delta-4 desaturase activity |
orf19.1351	0.514578	0.415993	0.461795	0.797544	0.804398	0.85735		Predicted ORF in Assemblies 19, 20 and 21
orf19.5664	0.362009	0.254154	0.321487	0.686586	0.694672	0.743705	HOF1	Protein not essential for viability; similar to S. cerevisiae Hof1p, which is a protein localized to the bud neck and required for cytokinesis; periodic mRNA expression, peak at cell-cycle G2/M phase	GO:0000910 cytokinesis |	GO:0008092 cytoskeletal protein binding |	GO:0000142 cellular bud neck contractile ring |
orf19.9	0.577344	0.457778	0.451469	0.816321	0.746256	0.868005		Predicted ORF in Assemblies 19, 20 and 21; possibly spurious ORF (Annotation Working Group prediction)
orf19.3915	0.630439	0.453639	0.463824	0.828305	0.752394	0.787811		Predicted ORF in Assemblies 19, 20 and 21; Hog1p-induced; protein detected by mass spec in exponential and stationary phase cultures	GO:0006751 glutathione catabolic process |	GO:0008242 omega peptidase activity | GO:0070573 metallodipeptidase activity |	GO:0005739 mitochondrion | GO:0005840 ribosome |
orf19.15	0.562974	0.383164	0.477698	0.726442	0.762917	0.691224		Predicted ORF from Assembly 19; removed from Assembly 20
orf19.3493	0.322487	0.352521	0.261063	0.601646	0.800854	0.548406		Predicted ORF from Assembly 19; removed from Assembly 20
orf19.1598	0.446245	0.423742	0.464378	0.57128	0.715443	0.766204	ERG24	C-14 sterol reductase, has a role in ergosterol biosynthesis; mutation confers increased sensitivity to dyclonine	GO:0006696 ergosterol biosynthetic process | GO:0009405 pathogenesis | GO:0030448 hyphal growth | GO:0042493 response to drug |	GO:0050613 delta14-sterol reductase activity |	GO:0005783 endoplasmic reticulum |
orf19.1963	0.356017	0.315984	0.319853	0.511303	0.651656	0.551132		Predicted ORF in Assemblies 19, 20 and 21	GO:0009060 aerobic respiration |		GO:0005739 mitochondrion | GO:0005634 nucleus |
orf19.5862	0.406954	0.373988	0.646239	1.04861	0.836441	0.468622		Protein described as related to arginases; downregulated upon adherence to polystyrene; regulated by Gcn2p and Gcn4p	GO:0019547 arginine catabolic process to ornithine |	GO:0004053 arginase activity |
orf19.3879	0.455533	0.397263	0.631846	0.971069	0.707131	0.526869		Predicted ORF in Assemblies 19, 20 and 21; possibly spurious ORF (Annotation Working Group prediction); overlaps orf19.3879.1, which is a region annotated as blocked reading frame
orf19.3310	0.342607	0.44593	0.774437	1.04185	0.729933	0.496189		Predicted ORF in Assemblies 19, 20 and 21; possibly spurious ORF (Annotation Working Group prediction)
orf19.775	0.451679	0.487591	0.713447	1.07407	0.754638	0.573375		Predicted ORF in Assemblies 19, 20 and 21	GO:0006623 protein targeting to vacuole |
orf19.4539	0.340886	0.390487	0.672356	0.879914	0.73176	0.562407		Predicted ORF in Assemblies 19, 20 and 21	GO:0007264 small GTPase mediated signal transduction |	GO:0004871 signal transducer activity | GO:0005094 Rho GDP-dissociation inhibitor activity |	GO:0005829 cytosol |
orf19.6640	0.173494	0.252018	0.600181	0.866328	0.641192	0.513304	TPS1	Trehalose-6-phosphate synthase; role in hyphal growth and virulence in mouse systemic infection; upregulated in presence of human neutrophils; macrophage/pseudohyphal-repressed after 16h; detected by mass spec in stationary phase cultures	GO:0005992 trehalose biosynthetic process | GO:0009405 pathogenesis | GO:0030448 hyphal growth | GO:0006950 response to stress | GO:0042493 response to drug |	GO:0003825 alpha,alpha-trehalose-phosphate synthase (UDP-forming) activity |	GO:0005946 alpha,alpha-trehalose-phosphate synthase complex (UDP-forming) |
orf19.2608	0.0802592	0.0970695	0.563038	0.885008	0.318276	0.322917	ADH5	Putative alcohol dehydrogenase; soluble protein in hyphae; expression is regulated upon white-opaque switching; fluconazole-induced; antigenic during murine systemic infection; regulated by Nrg1p, Tup1p; macrophage-downregulated protein	GO:0006113 fermentation | GO:0006067 ethanol metabolic process | GO:0042710 biofilm formation |	GO:0004022 alcohol dehydrogenase (NAD) activity |	GO:0005625 soluble fraction | GO:0005737 cytoplasm |
orf19.5826	0.444887	0.395451	0.680971	0.816221	0.702511	0.616892		Predicted ORF in Assemblies 19, 20 and 21	GO:0006810 transport |	GO:0015185 L-gamma-aminobutyric acid transmembrane transporter activity |	GO:0016020 membrane |
orf19.4784	0.0960343	0.122219	0.329466	0.866074	0.341295	0.287444	CRP1	Copper transporter of the plasma membrane; P1-type ATPase (CPx type); mediates Cu resistance; similar to proteins of Menkes and Wilson disease; copper-induced; Tbf1p-activated; suppresses Cu sensitivity of S. cerevisiae cup1 null mutant	GO:0006878 cellular copper ion homeostasis | GO:0015673 silver ion transport | GO:0006825 copper ion transport | GO:0015691 cadmium ion transport | GO:0015680 intracellular copper ion transport |	GO:0004008 copper-exporting ATPase activity | GO:0005507 copper ion binding |	GO:0016021 integral to membrane | GO:0005886 plasma membrane | GO:0016020 membrane | GO:0005802 trans-Golgi network |
orf19.2107.1	0.0720473	0.101599	0.345405	0.611082	0.234974	0.2323	STF2	Protein involved in ATP biosynthesis; decreased expression in hyphae compared to yeast-form cells; downregulated by Efg1p; transcription is upregulated in clinical isolates from HIV+ patients with oral candidiasis	GO:0006754 ATP biosynthetic process |		GO:0005634 nucleus | GO:0005737 cytoplasm | GO:0005840 ribosome |
orf19.2127	0.449021	0.522918	0.715101	0.980091	0.679556	0.452831		Predicted ORF in Assemblies 19, 20 and 21; transcription is induced in response to alpha pheromone in SpiderM medium
orf19.7567	0.299994	0.30713	0.542368	0.891338	0.434148	0.307462		Predicted ORF in Assemblies 19, 20 and 21; transcription is induced in response to alpha pheromone in SpiderM medium
orf19.3053	0.419744	0.402008	0.579932	0.967198	0.606263	0.418754		Predicted ORF in Assemblies 19, 20 and 21; identified in extracts from biofilm and planktonic cells; protein detected by mass spec in exponential and stationary phase cultures
orf19.1614	0.255381	0.287619	0.34498	1.09887	0.395332	0.346375	MEP1	Ammonium permease; Mep1p is a more efficient ammonium permease than Mep2p, whereas Mep2p has additional regulatory role; not essential for viability; 11 predicted transmembrane regions; low mRNA abundance; hyphal downregulated	GO:0006995 cellular response to nitrogen starvation | GO:0015696 ammonium transport | GO:0019740 nitrogen utilization |	GO:0008519 ammonium transmembrane transporter activity |	GO:0005886 plasma membrane |
orf19.6832	0.349236	0.438216	0.574455	0.968001	0.553146	0.543604		Predicted ORF in Assemblies 19, 20 and 21
orf19.499	0.190526	0.258176	0.348524	0.866107	0.383744	0.302812		Predicted ORF in Assemblies 19, 20 and 21	GO:0006451 translational readthrough |	GO:0008757 S-adenosylmethionine-dependent methyltransferase activity |	GO:0005739 mitochondrion |
orf19.1345	0.451161	0.4271	0.470771	0.944392	0.665979	0.619802	LIP8	Secreted lipase, member of a differentially expressed lipase gene family with possible roles in nutrition and/or in creating an acidic microenvironment; LIP5 and LIP8 are expressed at all stages of both mucosal and systemic infection	GO:0016042 lipid catabolic process | GO:0009405 pathogenesis |	GO:0016298 lipase activity |	GO:0005576 extracellular region |
orf19.2451	0.0699229	0.0523482	0.0514443	0.699403	0.13437	0.234016	PGA45	Cell wall protein; putative GPI-anchor; downregulated in core caspofungin response; Hog1p-induced; regulated by Ssn6p; Mob2p-dependent hyphal regulation; possibly spurious ORF (Annotation Working Group prediction)			GO:0009986 cell surface | GO:0030445 yeast-form cell wall |
orf19.1334	0.491351	0.368008	0.495661	0.93217	0.744258	0.61887		Predicted ORF in Assemblies 19, 20 and 21; possibly spurious ORF (Annotation Working Group prediction); transcription is repressed in response to alpha pheromone in SpiderM medium
orf19.866	0.441241	0.41124	0.452666	0.992249	0.761154	0.674791	RAD32	Protein similar to S. cerevisiae protein with role in nucleotide excision repair; down-regulation associated with azole resistance	GO:0019985 bypass DNA synthesis | GO:0006260 DNA replication |	GO:0003887 DNA-directed DNA polymerase activity |	GO:0005657 replication fork |
orf19.6877	0.339659	0.277568	0.389555	1.0585	0.772133	0.665422		Predicted ORF in Assemblies 19, 20 and 21; transcription is upregulated in response to treatment with caspofungin, ciclopirox olamine or ketoconazole; gene of core caspofungin response			GO:0005886 plasma membrane |
orf19.4736	0.263895	0.287525	0.341906	1.06956	0.688431	0.426268		Predicted ORF in Assemblies 19, 20 and 21	GO:0016576 histone dephosphorylation | GO:0006470 protein amino acid dephosphorylation |	GO:0004035 alkaline phosphatase activity |	GO:0000329 fungal-type vacuole membrane |
orf19.2602	0.158252	0.135572	0.213174	0.668756	0.492814	0.283782	OPT1	Oligopeptide transporter; transports 3-to-5-residue peptides; alleles are distinct, one has intron; not ABC or PTR type transporter; suppresses S. cerevisiae ptr2-2 mutant defects; induced by BSA or peptides; Stp3p, Hog1p regulated	GO:0006857 oligopeptide transport | GO:0006790 sulfur metabolic process | GO:0019740 nitrogen utilization | GO:0042493 response to drug |	GO:0015197 peptide transporter activity | GO:0015198 oligopeptide transporter activity | GO:0005427 proton-dependent oligopeptide secondary active transmembrane transporter activity |	GO:0016021 integral to membrane | GO:0005783 endoplasmic reticulum | GO:0005887 integral to plasma membrane |
orf19.744	0.2323	0.197593	0.35973	0.742747	0.526018	0.332566	GDB1	Putative glycogen debranching enzyme; expression is regulated upon white-opaque switching; regulated by Nrg1p, Tup1p	GO:0005980 glycogen catabolic process |	GO:0004133 glycogen debranching enzyme activity | GO:0004135 amylo-alpha-1,6-glucosidase activity | GO:0004134 4-alpha-glucanotransferase activity |	GO:0005739 mitochondrion |
orf19.5612	0.177086	0.179226	0.300245	0.471085	0.449132	0.439434	BMT4	Putative beta-mannosyltransferase, required for elongation of beta-mannose chains on the acid-labile fraction of cell wall phosphopeptidomannan; member of a 9-gene family; regulated by Tsa1p, Tsa1Bp	GO:0070135 beta-1,2-oligomannoside metabolic process |
orf19.4530.1	0.194332	0.189797	0.322078	0.586931	0.531912	0.391757		ORF Predicted by Annotation Working Group; regulated by Nrg1p, Tup1p
orf19.4402	0.329772	0.265967	0.458636	0.694263	0.594561	0.501447		Predicted ORF from Assembly 19; possibly spurious ORF (Annotation Working Group prediction); removed from Assembly 20
orf19.1982	0.289369	0.222371	0.405934	0.563218	0.69211	0.362993		Predicted ORF from Assembly 19; merged with orf19.588 in Assembly 20
orf19.1570	0.402506	0.459225	0.554846	0.724808	0.893068	0.648058	ERG7	2,3-epoxysqualene-lanosterol cyclase (lanosterol synthase), catalyzes the conversion of 2,3-oxidosqualene to lanosterol in sterol biosynthesis; fluconazole-induced	GO:0006696 ergosterol biosynthetic process |	GO:0000250 lanosterol synthase activity |	GO:0005886 plasma membrane | GO:0005783 endoplasmic reticulum | GO:0005811 lipid particle |
orf19.2768	0.151287	0.166708	0.462396	0.54315	0.764952	0.37113	AMS1	Putative alpha-mannosidase; transcription is regulated by Nrg1p; induced during cell wall regeneration	GO:0009313 oligosaccharide catabolic process |	GO:0004559 alpha-mannosidase activity |	GO:0005774 vacuolar membrane |
orf19.7676	0.420911	0.224715	0.647438	0.707337	0.526309	0.515215	XYL2	Protein described as similar to D-xylulose reductase; immunogenic in mouse; soluble protein in hyphae; Hog1p-induced; induced during cell wall regeneration; caspofungin or fluconazole-induced; Mnl1p-induced in weak acid stress		GO:0003939 L-iditol 2-dehydrogenase activity |	GO:0030446 hyphal cell wall | GO:0005625 soluble fraction |
orf19.4279	0.105149	0.110672	0.387008	0.311078	0.448997	0.831849	MNN1	Putative alpha-1,3-mannosyltransferase, a component of mannosyltransferase complex; transcription is negatively regulated by Rim101p; transcription is elevated in chk1 and nik1 homozygous null mutants, but not in the sln1 null mutant	GO:0006493 protein amino acid O-linked glycosylation | GO:0006491 N-glycan processing |	GO:0000033 alpha-1,3-mannosyltransferase activity |	GO:0005794 Golgi apparatus |
orf19.3820	0.305974	0.312028	0.598867	0.579915	0.676722	0.849371		Predicted ORF in Assemblies 19, 20 and 21; clade-associated gene expression
orf19.7459	0.207836	0.237175	0.566043	0.522877	0.583511	0.95347		Predicted ORF in Assemblies 19, 20 and 21; fluconazole-induced; ketoconazole-repressed	GO:0006413 translational initiation | GO:0009060 aerobic respiration | GO:0043488 regulation of mRNA stability |		GO:0031314 extrinsic to mitochondrial inner membrane |
orf19.1314	0.434198	0.439107	0.74499	0.711664	0.62618	0.815827		Predicted ORF in Assemblies 19, 20 and 21
orf19.2223	0.321918	0.319228	0.657527	0.656623	0.557122	0.703117		Predicted ORF from Assembly 19; removed from Assembly 20
orf19.2619	0.138885	0.175978	0.523441	0.415248	0.512022	0.650078	PHO113	Protein described as a constitutive acid phosphatase; transcription is negatively regulated by Rim101p; DTT-extractable; N-glycosylated	GO:0015888 thiamin transport |	GO:0003993 acid phosphatase activity |	GO:0030287 cell wall-bounded periplasmic space | GO:0009986 cell surface | GO:0005576 extracellular region |
orf19.7404	0.35224	0.36625	0.657767	0.615813	0.721097	0.719794		Predicted ORF in Assemblies 19, 20 and 21	GO:0009071 serine family amino acid catabolic process | GO:0006567 threonine catabolic process |	GO:0003941 L-serine ammonia-lyase activity | GO:0004794 L-threonine ammonia-lyase activity |	GO:0042645 mitochondrial nucleoid |
orf19.5079	0.102008	0.141653	0.564651	0.442761	0.507437	0.520477	CDR4	Putative transporter of ATP-binding cassette (ABC) superfamily; fluconazole, Sfu1p, Hog1p, core stress response induced; caspofungin repressed; fluconazole resistance is not affected by mutation or correlated with expression	GO:0046618 drug export | GO:0006810 transport |	GO:0005215 transporter activity | GO:0042626 ATPase activity, coupled to transmembrane movement of substances | GO:0008559 xenobiotic-transporting ATPase activity | GO:0005524 ATP binding |	GO:0016021 integral to membrane | GO:0005886 plasma membrane |
orf19.1691	0.0132505	0.0154489	0.268596	0.0747006	0.0767587	0.461302		Predicted ORF in Assemblies 19, 20 and 21; fluconazole-induced; filament induced; Hog1p-induced; regulated by Nrg1p, Tup1p; increased expression in response to prostaglandins			GO:0005886 plasma membrane |
orf19.6852	0.483624	0.46587	0.732811	0.808889	0.807577	0.776772		Predicted ORF in Assemblies 19, 20 and 21
orf19.4943	0.102855	0.135434	0.391196	0.598099	0.493094	0.463203	PSA2	Predicted ORF in Assemblies 19, 20 and 21; macrophage-downregulated gene; protein detected by mass spec in stationary phase cultures	GO:0000032 cell wall mannoprotein biosynthetic process | GO:0009298 GDP-mannose biosynthetic process |	GO:0004475 mannose-1-phosphate guanylyltransferase activity |	GO:0005737 cytoplasm |
orf19.1667.1	0.243358	0.247251	0.472916	0.772044	0.698392	0.675551		ORF Predicted by Annotation Working Group			GO:0005634 nucleus | GO:0005737 cytoplasm |
orf19.4013	0.235368	0.30765	0.459062	0.667007	0.664237	0.698148		Predicted ORF in Assemblies 19, 20 and 21			GO:0005783 endoplasmic reticulum |
orf19.1654	0.354686	0.344481	0.73434	0.899678	0.774017	0.823328		Predicted ORF in Assemblies 19, 20 and 21; increased expression in response to prostaglandins
orf19.1408	0.19232	0.228847	0.79839	0.585462	0.694819	0.556766		Predicted ORF from Assembly 19; merged with orf19.6116 in Assembly 20
orf19.734	0.147724	0.169784	0.527167	0.55191	1.15828	0.594616	GLK1	Putative glucokinase; transcription is regulated upon yeast-hyphal switch; transcriptionally regulated by Efg1p; fluconazole-induced; induced in core stress response; shows colony morphology-related gene regulation by Ssn6p	GO:0006096 glycolysis | GO:0006013 mannose metabolic process | GO:0046323 glucose import |	GO:0004340 glucokinase activity |	GO:0005829 cytosol | GO:0001950 plasma membrane enriched fraction |
orf19.2969	0.308367	0.498521	0.653954	0.935773	0.790319	0.627649	RAD16	Protein similar to S. cerevisiae Rad16p; flucytosine induced	GO:0042787 protein ubiquitination during ubiquitin-dependent protein catabolic process | GO:0000715 nucleotide-excision repair, DNA damage recognition |	GO:0008094 DNA-dependent ATPase activity | GO:0004842 ubiquitin-protein ligase activity | GO:0003684 damaged DNA binding |	GO:0000113 nucleotide-excision repair factor 4 complex | GO:0031463 Cul3-RING ubiquitin ligase complex | GO:0000108 repairosome |
orf19.4716	0.0382505	0.143853	0.289944	0.309716	0.457093	0.228654	GDH3	Protein described as similar to NADP-glutamate dehydrogenase; hyphal downregulated expression; transcription is regulated by Nrg1p, Plc1p; downregulated by Efg1p; upregulated by Rim101p at pH 8; ciclopirox olamine induced	GO:0006537 glutamate biosynthetic process |	GO:0004354 glutamate dehydrogenase (NADP+) activity |	GO:0005739 mitochondrion | GO:0005634 nucleus | GO:0005625 soluble fraction |
orf19.6078	0.565461	0.326184	0.545598	0.48925	0.602048	0.419038	POL93	Predicted ORF in retrotransposon Tca8 with similarity to the Pol region of retrotransposons encoding reverse transcriptase, protease and integrase; downregulated in response to ciclopirox olamine; induced upon biofilm formation
orf19.7283	0.542049	0.463781	0.550344	0.47055	0.499412	0.376611		Predicted ORF in Assemblies 19, 20 and 21
orf19.45	0.428762	0.367418	0.406151	0.371736	0.340764	0.388065		Predicted ORF from Assembly 19; merged with orf19.5742 in Assembly 20
orf19.561	0.483299	0.481298	0.531504	0.476024	0.456766	0.520314		Predicted ORF from Assembly 19; removed from Assembly 20
orf19.410	0.479466	0.500163	0.556276	0.539994	0.490613	0.507411		Predicted ORF from Assembly 19; removed from Assembly 20
orf19.3040	0.321712	0.361896	0.453637	0.386794	0.34143	0.393456	EHT1	Protein similar to S. cerevisiae Eht1p; transcription is induced in response to alpha pheromone in SpiderM medium	GO:0051793 medium-chain fatty acid catabolic process | GO:0051792 medium-chain fatty acid biosynthetic process |	GO:0034338 short-chain carboxylesterase activity | GO:0034319 alcohol O-butanoyltransferase activity | GO:0017171 serine hydrolase activity |	GO:0005811 lipid particle | GO:0005741 mitochondrial outer membrane |
orf19.1964	0.176151	0.134347	0.193554	0.16361	0.226687	0.17681		Putative protein of unknown function; downregulated upon fluphenazine treatment; upregulated upon benomyl treatment and in an RHE model; regulated by Nrg1p, Tup1p
orf19.5525	0.262655	0.234847	0.366643	0.281872	0.346919	0.248284		Protein abundance is affected by URA3 expression in the CAI-4 strain background; regulated by Efg1p and Efh1p; repressed by Rgt1p; protein detected by mass spec in exponential and stationary phase cultures			GO:0005634 nucleus | GO:0005737 cytoplasm |
orf19.5729	0.470582	0.476828	0.616363	0.454896	0.415284	0.443971	FGR17	Putative DNA-binding transcription factor; has zinc cluster DNA-binding motif; lacks an ortholog in S. cerevisiae; transposon mutation affects filamentous growth	GO:0030447 filamentous growth | GO:0009063 cellular amino acid catabolic process | GO:0006355 regulation of transcription, DNA-dependent |	GO:0003700 transcription factor activity |	GO:0005634 nucleus |
orf19.4107	0.433819	0.387093	0.591046	0.452215	0.363519	0.362719		Predicted ORF in Assemblies 19, 20 and 21	GO:0006798 polyphosphate catabolic process |	GO:0004309 exopolyphosphatase activity |	GO:0005737 cytoplasm |
orf19.4528	0.487536	0.459933	0.620322	0.460654	0.496826	0.448732		Predicted ORF in Assemblies 19, 20 and 21
orf19.4624	0.439504	0.413293	0.533845	0.492835	0.455798	0.393192	HRT2	Protein described as having a role in Ty3 transposition; decreased expression in hyphae compared to yeast-form cells; protein detected by mass spec in stationary phase cultures			GO:0005634 nucleus | GO:0005737 cytoplasm |
orf19.2018.1	0.545729	0.366213	0.508799	0.535377	0.458193	0.463917		Predicted ORF in Assembly 20 and 21; gene has intron; similar to human BLOC1S2
orf19.7125	0.513209	0.394285	0.441551	0.526275	0.471321	0.453015		Predicted ORF in Assemblies 19, 20 and 21
orf19.689	0.0670643	0.026557	0.0345246	0.0814507	0.0573192	0.0569731	PLB1	Phospholipase B; required for wild-type host cell penetration and for wild-type virulence in mouse model of systemic infection; Hog1p-induced; predicted signal sequence, N-glycosylation, and possible Y phosphorylation site, not GPI anchor	GO:0009405 pathogenesis | GO:0044001 migration in host | GO:0030384 phosphoinositide metabolic process |	GO:0004622 lysophospholipase activity |	GO:0005576 extracellular region | GO:0005886 plasma membrane |
orf19.5779	0.470256	0.321827	0.387506	0.377459	0.459351	0.404036	RNR1	Protein similar S. cerevisiae Rnr1p, large subunit of ribonucleotide reductase; expression greater in low iron; transposon mutation affects filamentous growth; farnesol upregulated in biofilm; regulated by cell cycle, tyrosol, cell density	GO:0030447 filamentous growth | GO:0006260 DNA replication | GO:0009263 deoxyribonucleotide biosynthetic process |	GO:0004748 ribonucleoside-diphosphate reductase activity | GO:0000166 nucleotide binding |	GO:0005829 cytosol | GO:0005971 ribonucleoside-diphosphate reductase complex |
orf19.2966	0.438031	0.403541	0.484445	0.563362	0.450697	0.517845		Predicted ORF in Assemblies 19, 20 and 21; clade-associated gene expression; farnesol-downregulated		GO:0008806 carboxymethylenebutenolidase activity |	GO:0005739 mitochondrion |
orf19.752	0.323951	0.352162	0.435627	0.504176	0.436957	0.488971		Predicted ORF in Assemblies 19, 20 and 21
orf19.1565	0.48557	0.48442	0.602095	0.609392	0.571948	0.65271		Putative transcription factor with zinc finger DNA-binding motif	GO:0006355 regulation of transcription, DNA-dependent | GO:0006400 tRNA modification |	GO:0017150 tRNA dihydrouridine synthase activity | GO:0003700 transcription factor activity |	GO:0005634 nucleus | GO:0005737 cytoplasm |
orf19.7580	0.438691	0.381567	0.520563	0.570003	0.524995	0.547764		Predicted ORF in Assemblies 19, 20 and 21
orf19.3584	0.330628	0.352739	0.420275	0.447935	0.492236	0.466033		Predicted ORF from Assembly 19; merged with orf19.225 in Assembly 20
orf19.2335	0.246056	0.232137	0.309808	0.300687	0.358237	0.384812		Predicted ORF in Assemblies 19, 20 and 21; mutation confers hypersensitivity to 5-fluorouracil (5-FU); Hog1p-induced; protein detected by mass spec in stationary phase cultures	GO:0042493 response to drug |	GO:0004177 aminopeptidase activity |	GO:0005737 cytoplasm | GO:0005840 ribosome |
orf19.2452	0.151874	0.119673	0.144382	0.196755	0.201316	0.239267		Transcriptionally regulated by iron; expression greater in high iron; downregulated in core caspofungin response; ketoconazole-repressed; shows colony morphology-related gene regulation by Ssn6p; possibly subject to Kex2p processing
orf19.6447	0.324753	0.302324	0.426313	0.405874	0.441755	0.387133	ARF1	ADP-ribosylation factor, probable GTPase involved in intracellular transport; one of several C. albicans ADP-ribosylation factors; N-myristoylprotein; substrate of Nmt1p	GO:0006891 intra-Golgi vesicle-mediated transport | GO:0006888 ER to Golgi vesicle-mediated transport |	GO:0003924 GTPase activity | GO:0005525 GTP binding |	GO:0005829 cytosol | GO:0005798 Golgi-associated vesicle |
orf19.5742	0.394151	0.342037	0.471907	0.491768	0.469141	0.452639	ALS9	ALS family protein; expressed during infection of human epithelial cells; confers laminin adhesion to S. cerevisiae; highly variable; ALS family includes cell-surface glycoproteins, some with adhesin function; putative GPI-anchor	GO:0007155 cell adhesion | GO:0043709 cell adhesion during single-species biofilm formation | GO:0043710 cell adhesion during multi-species biofilm formation | GO:0033554 cellular response to stress | GO:0000501 flocculation via cell wall protein-carbohydrate interaction |	GO:0005537 mannose binding |	GO:0009986 cell surface | GO:0009277 fungal-type cell wall |
orf19.4899	0.261125	0.245014	0.310965	0.315085	0.310783	0.328281	GCA1	Predicted extracellular or plasma membrane-associated glucoamylase; promotes biofilm matrix formation; possible adhesin; gene is transcribed during rat oral infection; transcription is regulated by carbohydrates, pH, galactose	GO:0016052 carbohydrate catabolic process | GO:0009272 fungal-type cell wall biogenesis | GO:0042710 biofilm formation |	GO:0016160 amylase activity | GO:0004558 alpha-glucosidase activity |	GO:0005886 plasma membrane | GO:0005576 extracellular region | GO:0005783 endoplasmic reticulum |
orf19.4066	0.364816	0.367198	0.552412	0.465717	0.532692	0.505719		Predicted ORF in Assemblies 19, 20 and 21; Hog1p-downregulated
orf19.5812	0.188859	0.166306	0.327772	0.260292	0.327043	0.351916		Predicted ORF in Assemblies 19, 20 and 21			GO:0005634 nucleus |
orf19.1795.1	0.481063	0.402949	0.568942	0.481369	0.584059	0.582456		ORF added to Assembly 21 based on comparative genome analysis
orf19.3051	0.276595	0.254571	0.386073	0.278165	0.360706	0.368309		Predicted ORF in Assemblies 19, 20 and 21; shows colony morphology-related gene regulation by Ssn6p
orf19.6214	0.221616	0.238135	0.344545	0.380212	0.407807	0.38983	ATC1	Cell wall acid trehalase; catalyzes hydrolysis of the disaccharide trehalose; similar to S. cerevisiae vacuolar acid trehalase (Ath1p)	GO:0005993 trehalose catabolic process | GO:0006950 response to stress |	GO:0004555 alpha,alpha-trehalase activity |	GO:0009277 fungal-type cell wall | GO:0000324 fungal-type vacuole | GO:0030287 cell wall-bounded periplasmic space |
orf19.2076	0.242596	0.248513	0.371306	0.405009	0.415007	0.45018		Predicted ORF in Assemblies 19, 20 and 21
orf19.223	0.257268	0.256863	0.384847	0.477365	0.484169	0.454574		Predicted ORF in Assemblies 19, 20 and 21; increased expression in response to prostaglandins	GO:0045332 phospholipid translocation | GO:0019236 response to pheromone |	GO:0004672 protein kinase activity |	GO:0005737 cytoplasm |
orf19.7328	0.355449	0.391775	0.523898	0.540126	0.579746	0.61527		Gene transcription regulated by Mig1p and Tup1p
orf19.225	0.349889	0.409001	0.546995	0.508254	0.645459	0.507508		Predicted ORF in Assemblies 19, 20 and 21
orf19.6837				0.373459	0.515526	0.380249		Predicted ORF in Assemblies 19, 20 and 21			GO:0005737 cytoplasm |
orf19.1862	0.170651	0.167376	0.409758	0.337723	0.39873	0.28426		Possible stress protein; increased transcription is associated with CDR1 and CDR2 overexpression or fluphenazine treatment; transcription regulated by Sfu1p, Nrg1p, Tup1p	GO:0016070 RNA metabolic process |		GO:0005634 nucleus | GO:0005737 cytoplasm |
orf19.5400	0.171761	0.108899	0.247488	0.230092	0.115997	0.181417		ORF Predicted by Annotation Working Group; merged with orf19.5399 in Assembly 20
orf19.388	0.194216	0.198934	0.39457	0.285455	0.182651	0.237452	CAF16	ABC family protein, predicted not to be a transporter; caspofungin repressed	GO:0006810 transport | GO:0006355 regulation of transcription, DNA-dependent |	GO:0042626 ATPase activity, coupled to transmembrane movement of substances | GO:0005524 ATP binding |	GO:0005737 cytoplasm | GO:0030014 CCR4-NOT complex |
orf19.5632	0.380684	0.346599	0.495837	0.461096	0.351603	0.526398		Predicted ORF from Assembly 19; merged with orf19.377 in Assembly 20
orf19.5078	0.170201	0.153658	0.313315	0.270949	0.187532	0.292468		Predicted ORF in Assemblies 19, 20 and 21
orf19.4836	0.11826	0.139476	0.26162	0.177133	0.138711	0.249723	URA1	Dihydroorotate dehydrogenase (DHODH); enzyme of de novo pyrimidine biosynthesis; putative bipartite mitochondrial targeting motif, membrane spanning region; transcription is regulated upon yeast-hyphal switch, or by Nrg1p, Mig1p, Tup1p	GO:0006207 'de novo' pyrimidine base biosynthetic process |	GO:0004152 dihydroorotate dehydrogenase activity |	GO:0031304 intrinsic to mitochondrial inner membrane |
orf19.411	0.424248	0.413426	0.611877	0.639841	0.54193	0.645366		Protein described as similar to GTPase regulators; possibly spurious ORF (Annotation Working Group prediction); transcriptionally regulated by iron; expression greater in low iron; transcriptionally activated by Mnl1p under weak acid stress
orf19.2069	0.482436	0.481457	0.741943	0.634832	0.559742	0.68846	SMF3	Protein described as vacuolar iron transporter; alkaline upregulated; caspofungin repressed; transcriptionally activated by Mnl1p under weak acid stress	GO:0006880 intracellular sequestering of iron ion |	GO:0005381 iron ion transmembrane transporter activity |	GO:0000329 fungal-type vacuole membrane | GO:0005886 plasma membrane |
orf19.757.1				0.467572	0.387602	0.528484		ORF added to Assembly 21 based on comparative genome analysis
orf19.7329	0.390445	0.378407	0.613167	0.607936	0.442845	0.526757		Predicted ORF in Assemblies 19, 20 and 21	GO:0031505 fungal-type cell wall organization | GO:0030433 ER-associated protein catabolic process | GO:0006333 chromatin assembly or disassembly |	GO:0004842 ubiquitin-protein ligase activity |	GO:0005783 endoplasmic reticulum |
orf19.4914.1	0.109644	0.0856035	0.548527	0.208917	0.105091	0.179058		ORF added to Assembly 21 based on comparative genome analysis
orf19.5288	0.042881	0.0599808	0.504049	0.129375	0.0548024	0.178124	IFE2	Protein described as an alcohol dehydrogenase; decreased expression in hyphae compared to yeast-form cells; Efg1p-regulated; fluconazole-induced; Hog1p-induced; increased expression in response to prostaglandins	GO:0019650 glucose catabolic process to butanediol |	GO:0000721 (R,R)-butanediol dehydrogenase activity |	GO:0005737 cytoplasm |
orf19.4833	0.4655	0.505475	0.709272	0.609572	0.493983	0.803025	MLS1	Malate synthase; enzyme of the glyoxylate cycle; peroxisomal; no mammalian homolog; transcription is induced upon phagocytosis by macrophage; regulated upon white-opaque switching; biofilm-repressed; strong oxidative stress induced	GO:0006097 glyoxylate cycle |	GO:0004474 malate synthase activity |	GO:0005782 peroxisomal matrix | GO:0005777 peroxisome |
orf19.5527	0.411077	0.416531	0.66169	0.609623	0.639648	0.742412		Predicted ORF in Assemblies 19, 20 and 21; similar to S. cerevisiae Ymr285p and Yml118p; gene transcribed divergently from SEC20	GO:0006364 rRNA processing |	GO:0004521 endoribonuclease activity |	GO:0005622 intracellular |
orf19.3392	0.322425	0.352655	0.626458	0.48918	0.577879	0.652445	DOG1	Putative 2-deoxyglucose-6-phosphatase; haloacid dehalogenase hydrolase/phosphatase superfamily; similar to S. cerevisiae Dog1p, Dog2p, Hor1p, and Rhr2p; regulated by Nrg1p, Tup1p	GO:0006006 glucose metabolic process | GO:0030433 ER-associated protein catabolic process |	GO:0003850 2-deoxyglucose-6-phosphatase activity |	GO:0005634 nucleus | GO:0005737 cytoplasm |
orf19.2803	0.0450226	0.0538006	0.316237	0.151327	0.257817	0.278787	HEM13	Coproporphyrinogen III oxidase; antigenic in human, mouse; localizes to yeast-form cell surface, not hyphae; soluble in hyphae; iron-regulated expression; macrophage-downregulated protein; not Rfg1p regulated, farnesol-induced	GO:0006783 heme biosynthetic process |	GO:0004109 coproporphyrinogen oxidase activity |	GO:0030445 yeast-form cell wall | GO:0009986 cell surface | GO:0005625 soluble fraction | GO:0005743 mitochondrial inner membrane | GO:0005829 cytosol |
orf19.904	0.289131	0.342813	0.591495	0.55735	0.489857	0.650327		Predicted ORF in Assemblies 19, 20 and 21; possibly spurious ORF (Annotation Working Group prediction)
orf19.7205	0.417429	0.451981	0.650808	0.625456	0.628592	0.645684	DUR7	Putative urea transporter; fungal-specific (no human or murine homolog)	GO:0015840 urea transport |	GO:0015204 urea transmembrane transporter activity |	GO:0005886 plasma membrane |
orf19.1067	0.123816	0.137411	0.425314	0.230306	0.257959	0.300793	GPM2	Protein described as phosphoglycerate mutase; decreased expression in hyphae compared to yeast-form cells; macrophage/pseudohyphal-repressed; induced by high levels of peroxide stress, farnesol-induced	GO:0006096 glycolysis | GO:0006094 gluconeogenesis |	GO:0004619 phosphoglycerate mutase activity |	GO:0005829 cytosol | GO:0009277 fungal-type cell wall |
orf19.2132	0.353132	0.40527	0.703225	0.508945	0.585389	0.606657		Predicted ORF in Assemblies 19, 20 and 21; possibly spurious ORF (Annotation Working Group prediction)
orf19.4270	0.467568	0.427648	0.715437	0.591328	0.648324	0.62145		Predicted ORF in Assemblies 19, 20 and 21	GO:0006493 protein amino acid O-linked glycosylation |	GO:0000033 alpha-1,3-mannosyltransferase activity |
orf19.13	0.228916	0.220173	0.628921	0.434022	0.424713	0.431974		Putative glucokinase; regulated upon yeast-hyphal switch; regulated by Efg1p; fluconazole-induced; induced in core stress response; shows colony morphology-related gene regulation by Ssn6p; merged with orf19.734 in Assembly 20
orf19.5348	0.180227	0.207287	0.508084	0.267038	0.471586	0.435439	TPS3	Protein described as regulatory subunit of trehalose-phosphate synthase; regulated by Efg1p; biofilm-repressed expression; regulated by Tsa1p, Tsa1Bp under H2O2 stress conditions	GO:0006950 response to stress | GO:0005992 trehalose biosynthetic process |	GO:0003825 alpha,alpha-trehalose-phosphate synthase (UDP-forming) activity | GO:0030234 enzyme regulator activity | GO:0004805 trehalose-phosphatase activity |	GO:0005946 alpha,alpha-trehalose-phosphate synthase complex (UDP-forming) |
orf19.6116	0.199538	0.202833	0.670274	0.42628	0.524923	0.472088	GLK4	Protein described as a glucokinase; decreased expression in hyphae compared to yeast-form cells	GO:0005975 carbohydrate metabolic process |	GO:0004340 glucokinase activity |	GO:0005829 cytosol |
orf19.2253	0.440462	0.478816	0.833394	0.560535	0.571759	0.64726		Predicted ORF in Assemblies 19, 20 and 21; expression is regulated upon white-opaque switching; transcription is repressed in response to alpha pheromone in SpiderM medium
orf19.4778	0.358399	0.424887	0.781071	0.399289	0.507028	0.593717		Putative transcription factor with zinc cluster DNA-binding motif; has similarity to S. cerevisiae Lys14p, which is a transcription factor involved in the regulation of lysine biosynthesis genes; fungal-specific	GO:0006355 regulation of transcription, DNA-dependent |	GO:0003700 transcription factor activity |	GO:0005634 nucleus |
orf19.4617	0.168468	0.213837	0.64946	0.229716	0.308993	0.446757		Predicted ORF in Assemblies 19, 20 and 21	GO:0019048 virus-host interaction | GO:0006474 N-terminal protein amino acid acetylation |	GO:0004042 amino-acid N-acetyltransferase activity | GO:0004596 peptide alpha-N-acetyltransferase activity |	GO:0031417 NatC complex |
orf19.1433	0.131452	0.18398	0.604804	0.116543	0.161125	0.301513		Predicted ORF in Assemblies 19, 20 and 21; shows colony morphology-related gene regulation by Ssn6p
orf19.1116	0.219654	0.246872	0.411808	0.266824	0.336882	0.404794		Predicted ORF in Assemblies 19, 20 and 21; possibly spurious ORF (Annotation Working Group prediction)
orf19.5408	0.222703	0.252348	0.422873	0.283718	0.339611	0.403489		Predicted ORF in Assemblies 19, 20 and 21	GO:0006873 cellular ion homeostasis |	GO:0004672 protein kinase activity |	GO:0005737 cytoplasm |
orf19.4747	0.143305	0.196931	0.417738	0.189991	0.266734	0.328766	HEM14	Putative protoporphyrinogen oxidase involved in heme biosynthesis; predicted Kex2p substrate; transcription is regulated by iron; mRNA levels are decreased in a yfh1 null mutant	GO:0006783 heme biosynthetic process |	GO:0004729 oxygen-dependent protoporphyrinogen oxidase activity |	GO:0005743 mitochondrial inner membrane |
orf19.1999	0.251623	0.273442	0.507619	0.339836	0.374518	0.475848		Predicted ORF in Assemblies 19, 20 and 21
orf19.391	0.108001	0.124735	0.353172	0.17859	0.169306	0.328627	UPC2	Transcriptional regulator of ergosterol biosynthetic genes and sterol uptake; binds ERG2 promoter; has Zn(2)-Cys(6) binuclear cluster; induced upon ergosterol depletion, by azoles, anaerobicity; macrophage/pseudohyphal-repressed	GO:0016125 sterol metabolic process | GO:0008204 ergosterol metabolic process | GO:0045944 positive regulation of transcription from RNA polymerase II promoter | GO:0016481 negative regulation of transcription | GO:0016126 sterol biosynthetic process |	GO:0003702 RNA polymerase II transcription factor activity | GO:0003700 transcription factor activity | GO:0016564 transcription repressor activity |	GO:0005634 nucleus | GO:0016021 integral to membrane | GO:0048471 perinuclear region of cytoplasm |
orf19.1034	0.152438	0.168777	0.441077	0.198205	0.185132	0.389747		Predicted ORF in Assemblies 19, 20 and 21; caspofungin repressed
orf19.4193	0.461202	0.492612	0.69553	0.485768	0.601942	0.708825		Predicted ORF in Assemblies 19, 20 and 21			GO:0005634 nucleus | GO:0005737 cytoplasm |
orf19.333	0.117328	0.117103	0.314595	0.216335	0.267528	0.496878	FCY2	Putative purine-cytosine permease of pyrimidine salvage; similar to S. cerevisiae Fcy2p; mutation associated with resistance to flucytosine in clinical isolates; transposon mutation affects filamentation; farnesol-upregulated in biofilm	GO:0008655 pyrimidine salvage | GO:0015893 drug transport | GO:0030447 filamentous growth |	GO:0015205 nucleobase transmembrane transporter activity |
orf19.767	0.111841	0.0912998	0.188995	0.140411	0.205122	0.380603	ERG3	C-5 sterol desaturase; introduces C-5(6) double bond into episterol in ergosterol biosynthesis; clinically-isolated homozygous null mutants show azole resistance, defects in hyphal growth and virulence; Efg1p-repressed; fluconazole-induced	GO:0006696 ergosterol biosynthetic process | GO:0042493 response to drug | GO:0030448 hyphal growth | GO:0009405 pathogenesis | GO:0006897 endocytosis |	GO:0000248 C-5 sterol desaturase activity |	GO:0005783 endoplasmic reticulum | GO:0005886 plasma membrane |
orf19.2949	0.520811	0.430457	0.633418	0.412697	0.583013	0.672078		Predicted ORF in Assemblies 19, 20 and 21			GO:0000329 fungal-type vacuole membrane |
orf19.4982	0.480358	0.420217	0.493492	0.6901	0.637957	0.59744		Predicted ORF in Assemblies 19, 20 and 21	GO:0006629 lipid metabolic process |		GO:0005811 lipid particle |
orf19.6570	0.183296	0.135827	0.177278	0.312766	0.301537	0.306342	NUP	Nucleoside permease; adenosine and guanosine are substrates, whereas cytidine, adenine, guanine, uridine, uracil are not; similar to a nucleoside permease of S. pombe; possibly processed by Kex2p	GO:0015858 nucleoside transport |	GO:0015506 nucleoside |	GO:0016020 membrane |
orf19.5674	0.0648704	0.0146916	0.0852865	0.179264	0.0794574	0.0720062	PGA10	Plasma membrane protein involved in heme-iron utilization; allows utilization of hemin and hemoglobin as iron sources in host tissues; predicted GPI anchor; hypoxia, ketoconazole, ciclopirox, or hyphal-induced; upregulated by Rim101p at pH8	GO:0006879 cellular iron ion homeostasis | GO:0044011 single-species biofilm formation on inanimate substrate | GO:0020028 hemoglobin import |	GO:0020037 heme binding |	GO:0009986 cell surface | GO:0009277 fungal-type cell wall |
orf19.7441	0.496227	0.340131	0.45196	0.700173	0.507986	0.647143		Predicted ORF in Assemblies 19, 20 and 21
orf19.4612	0.180106	0.10212	0.180277	0.36222	0.27549	0.443391		Predicted ORF in Assemblies 19, 20 and 21
orf19.2540	0.473123	0.378532	0.48533	0.674274	0.517969	0.697044	SAS3	Similar to silencing proteins; increased transcription is observed upon fluphenazine treatment	GO:0006342 chromatin silencing | GO:0006348 chromatin silencing at telomere | GO:0030466 chromatin silencing at silent mating-type cassette |	GO:0016407 acetyltransferase activity |	GO:0000786 nucleosome |
orf19.4031	0.484563	0.359075	0.487812	0.613349	0.522079	0.677164		Predicted ORF in Assemblies 19, 20 and 21			GO:0005737 cytoplasm |
orf19.6119	0.452566	0.279996	0.409044	0.725182	0.559241	0.717176		Predicted ORF in Assemblies 19, 20 and 21
orf19.1591	0.578713	0.39136	0.456857	0.610119	0.665454	0.702563	ERG10	Protein similar to acetyl-CoA acetyltransferase; role in ergosterol biosynthesis; soluble in hyphae; changes in protein abundance associated with azole resistance; fluconazole or ketoconazole induced; macrophage-downregulated protein	GO:0006696 ergosterol biosynthetic process |	GO:0003985 acetyl-CoA C-acetyltransferase activity |	GO:0005625 soluble fraction | GO:0005829 cytosol |
orf19.220	0.308005	0.154744	0.186893	0.391768	0.327625	0.427096	PIR1	Structural protein of cell wall; 1,3-beta-glucan-linked; O-glycosylated by Pmt1p; N-mannosylated; tandem repeats; heterozygous mutant has cell wall defects; hyphal repressed; Hog1p, fluconazole, hypoxia induced; iron, Efg1p, Plc1p regulated	GO:0007047 cell wall organization | GO:0006886 intracellular protein transport |	GO:0005199 structural constituent of cell wall |	GO:0009277 fungal-type cell wall | GO:0030445 yeast-form cell wall | GO:0005576 extracellular region |
orf19.2374	0.281005	0.140052	0.312177	0.34073	0.304596	0.525517		Predicted ORF from Assembly 19; removed from Assembly 20
orf19.2371	0.289803	0.174622	0.383532	0.375197	0.371698	0.604527		Putative Gag protein of retrotransposon Tca2; separated by a stop codon from Pol protein orf19.2372; both likely translated as single polyprotein that includes nucleocapsid-like protein (Gag), reverse transcriptase, protease, and integrase
orf19.5372	0.34592	0.184546	0.389568	0.435271	0.400092	0.694596		Predicted ORF from Assembly 19; orf19.5372 and orf19.5373 are similar to the Tca2 (pCal) retrotransposon, which is present in strain hOG1042 as 50 to 100 copies of a linear dsDNA; removed from Assembly 20; transcription is Tbf1p-activated
orf19.5373	0.444451	0.246204	0.444949	0.386201	0.470726	0.748806		Predicted ORF from Assembly 19; orf19.5372 and orf19.5373 are similar to the Tca2 (pCal) retrotransposon, which is present in strain hOG1042 as 50 to 100 copies of a linear dsDNA; clade-associated gene expression; removed from Assembly 20
orf19.2372	0.485639	0.256269	0.455263	0.404745	0.485528	0.783802		Putative Pol protein of retrotransposon Tca2; separated by a stop codon from Gag protein orf19.2371; both likely translated as single polyprotein that includes nucleocapsid-like protein (Gag), reverse transcriptase, protease, and integrase			GO:0005739 mitochondrion |
orf19.7278	0.384241	0.252206	0.354832	0.35871	0.409022	0.527215		Similar to a region of the Tca2 (pCal) retrotransposon, which is present in strain hOG1042 as 50 to 100 copies of a linear dsDNA
orf19.7348	0.417039	0.3167	0.456507	0.537498	0.289032	0.569401		Predicted ORF in Assemblies 19, 20 and 21; possibly spurious ORF (Annotation Working Group prediction)
orf19.301	0.535936	0.343445	0.511349	0.549903	0.383446	0.567756	PGA18	Putative GPI-anchored protein of unknown function; regulated by Nrg1p, Tup1p			GO:0009986 cell surface |
orf19.1329	0.460055	0.272356	0.419065	0.674773	0.300859	0.460614		Predicted ORF from Assembly 19; merged with orf19.6704 in Assembly 20
orf19.6687	0.588036	0.408522	0.559034	0.712164	0.448873	0.624419		Predicted ORF in Assemblies 19, 20 and 21
orf19.1442	0.25257	0.150463	0.282194	0.420051	0.200814	0.399278	PLB4.5	Putative phospholipase B; Hog1p-induced; regulated by Ssn6p; putative GPI-anchor; repressed during cell wall regeneration; clade-associated gene expression	GO:0030384 phosphoinositide metabolic process |	GO:0004622 lysophospholipase activity |	GO:0005576 extracellular region | GO:0005886 plasma membrane |
orf19.2227	0.476665	0.345161	0.468515	0.633175	0.441185	0.608695		Predicted ORF in Assemblies 19, 20 and 21; repressed by nitric oxide
orf19.4657	0.273475	0.255253	0.309325	0.560057	0.261714	0.454413		Predicted ORF in Assemblies 19, 20 and 21	GO:0030437 ascospore formation | GO:0046890 regulation of lipid biosynthetic process | GO:0006998 nuclear envelope organization |	GO:0004721 phosphoprotein phosphatase activity |	GO:0005739 mitochondrion | GO:0042175 nuclear envelope-endoplasmic reticulum network | GO:0016021 integral to membrane |
orf19.6731	0.263652	0.185734	0.389744	0.671867	0.338155	0.501806		Predicted ORF in Assemblies 19, 20 and 21; transcription is repressed in response to alpha pheromone in SpiderM medium
orf19.4433	0.379272	0.297644	0.441145	0.811009	0.392692	0.517526	CPH1	Transcription factor required for mating and hyphal growth on solid media; with Efg1p required for host cytokine response; in filamentation pathway with Ess1p and Czf1p; regulates genes of galactose metabolism	GO:0000747 conjugation with cellular fusion | GO:0030448 hyphal growth | GO:0007165 signal transduction | GO:0030447 filamentous growth | GO:0045449 regulation of transcription | GO:0009405 pathogenesis | GO:0044011 single-species biofilm formation on inanimate substrate | GO:0007329 positive regulation of transcription from RNA polymerase II promoter by pheromones | GO:0001403 invasive growth in…	GO:0003700 transcription factor activity | GO:0003677 DNA binding |	GO:0005634 nucleus |
orf19.2878	0.494927	0.430855	0.6546	0.57017	0.576068	0.441091	PGA15	Putative GPI-anchored protein of unknown function			GO:0009986 cell surface |
orf19.6396	0.35028	0.455199	0.643318	0.581588	0.489402	0.384499		Putative patatin-like phospholipase; similar to S. cerevisiae Yml059p, which is predicted to be a membrane protein: antigenic during human oral infection	GO:0009405 pathogenesis | GO:0034638 phosphatidylcholine catabolic process |	GO:0004622 lysophospholipase activity |	GO:0005783 endoplasmic reticulum |
orf19.101	0.355553	0.289846	0.451331	0.633869	0.272865	0.27619	RIM9	Protein required for alkaline pH response via the RIM101 signaling pathway; ortholog of S. cerevisiae RIM9 and A. nidulans palI	GO:0030437 ascospore formation | GO:0010226 response to lithium ion | GO:0010446 response to alkalinity | GO:0030447 filamentous growth |
orf19.4444	0.206776	0.207373	0.35971	0.504513	0.202997	0.211485	PHO15	Protein described as 4-nitrophenyl phosphatase; hyphal downregulated; induced in core stress response; induced by heavy metal (cadmium) stress via Hog1p	GO:0006470 protein amino acid dephosphorylation | GO:0048869 cellular developmental process |	GO:0003869 4-nitrophenylphosphatase activity | GO:0004035 alkaline phosphatase activity | GO:0004721 phosphoprotein phosphatase activity |	GO:0005634 nucleus | GO:0005737 cytoplasm |
orf19.490	0.392191	0.441982	0.52939	0.71047	0.431489	0.473232		Predicted ORF in Assemblies 19, 20 and 21			GO:0031415 NatA complex | GO:0022626 cytosolic ribosome |
orf19.2114	0.39055	0.372953	0.543951	0.699556	0.548043	0.483148		Predicted ORF in Assemblies 19, 20 and 21
orf19.539	0.163389	0.192248	0.359704	0.496153	0.262198	0.20733	LAP3	Protein described as an aminopeptidase; transcription is positively regulated by Sfu1p; transcription is repressed in response to alpha pheromone in SpiderM medium; clade-associated gene expression; virulence-group-correlated expression	GO:0043418 homocysteine catabolic process | GO:0046677 response to antibiotic |	GO:0004177 aminopeptidase activity | GO:0003676 nucleic acid binding | GO:0008234 cysteine-type peptidase activity | GO:0030528 transcription regulator activity |	GO:0005739 mitochondrion |
orf19.2248	0.189124	0.244005	0.349766	0.522478	0.332428	0.231624	ARE2	Acyl CoA:sterol acyltransferase (ASAT); uses cholesterol and oleoyl-CoA substrates; protoberberine derivative drug inhibits enzyme activity; 7 putative transmembrane regions; ketoconazole-induced	GO:0008204 ergosterol metabolic process |	GO:0004772 sterol O-acyltransferase activity | GO:0034737 ergosterol O-acyltransferase activity |	GO:0016021 integral to membrane | GO:0005783 endoplasmic reticulum |
orf19.6065	0.218557	0.220851	0.376538	0.414472	0.329878	0.298697		Gene transcription regulated by Mig1p and Tup1p; amphotericin B, caspofungin repressed; protein detected by mass spec in exponential and stationary phase cultures
orf19.5971	0.417437	0.363254	0.544776	0.602536	0.459776	0.390296		Predicted ORF in Assemblies 19, 20 and 21
orf19.3278	0.142336	0.0959177	0.274843	0.322174	0.155706	0.132861	GSY1	Protein described as glycogen synthase; enzyme of glycogen metabolism; transcription downregulated upon yeast-hyphal switch and regulated by Efg1p; strong oxidative stress induced; shows colony morphology-related gene regulation by Ssn6p	GO:0005978 glycogen biosynthetic process |	GO:0004373 glycogen (starch) synthase activity |	GO:0005739 mitochondrion |
orf19.2108	0.422885	0.358271	0.564388	0.605346	0.443437	0.244623	SOD6	Copper- and zinc-containing superoxide dismutase; expression regulated during planktonic growth; member of a gene family that includes SOD1, SOD4, SOD5, and SOD6; gene may contain an intron		GO:0004784 superoxide dismutase activity |	GO:0009986 cell surface |
orf19.2107	0.298048	0.35049	0.473082	0.610204	0.32708	0.2532	MUQ1	Protein described as choline phosphate cytidylyltransferase/phosphoethanolamine cytidylyltransferase; decreased expression in hyphae compared to yeast-form cells	GO:0006646 phosphatidylethanolamine biosynthetic process |	GO:0004105 choline-phosphate cytidylyltransferase activity | GO:0004306 ethanolamine-phosphate cytidylyltransferase activity |	GO:0005634 nucleus | GO:0005737 cytoplasm |
orf19.3601	0.46862	0.490827	0.647188	0.617642	0.426978	0.421801		Predicted ORF in Assemblies 19, 20 and 21	GO:0006260 DNA replication |	GO:0004386 helicase activity | GO:0016887 ATPase activity |
orf19.5615	0.307427	0.360236	0.498662	0.500506	0.263168	0.200366	AYR2	Predicted ORF in Assemblies 19, 20 and 21; shows colony morphology-related gene regulation by Ssn6p	GO:0006654 phosphatidic acid biosynthetic process |	GO:0000140 acylglycerone-phosphate reductase activity |	GO:0005811 lipid particle | GO:0005783 endoplasmic reticulum |
orf19.4952.1	0.47092	0.543389	0.536888	0.607068	0.3587	0.330839		ORF Predicted by Annotation Working Group		GO:0003755 peptidyl-prolyl cis-trans isomerase activity | GO:0005528 FK506 binding |	GO:0005789 endoplasmic reticulum membrane |
orf19.2164	0.542468	0.484714	0.69255	0.557524	0.381894	0.49322		Transcription is a-specific, alpha-factor induced; merged with orf19.2219 in Assembly 20
orf19.1121	0.489273	0.522451	0.733617	0.673985	0.436118	0.552804		Predicted ORF in Assemblies 19, 20 and 21
orf19.3515	0.29421	0.391499	0.525134	0.442916	0.253881	0.344265		Putative 3-hydroxyanthranilic acid dioxygenase, involved in NAD biosynthesis	GO:0034354 de novo NAD biosynthetic process from tryptophan |	GO:0000334 3-hydroxyanthranilate 3,4-dioxygenase activity |	GO:0005737 cytoplasm |
orf19.2219	0.582407	0.48877	0.747984	0.715838	0.450808	0.484738	ORF298	Predicted ORF in retrotransposon Tca3 with similarity to the Gag-Pol region of retrotransposons, which encodes nucleocapsid-like protein, reverse transcriptase, protease, and integrase; transcription is a-specific, alpha-factor induced
orf19.6440	0.462389	0.617947	0.706868	0.583679	0.441369	0.433501		Predicted ORF in Assemblies 19, 20 and 21	GO:0006511 ubiquitin-dependent protein catabolic process |	GO:0004842 ubiquitin-protein ligase activity |	GO:0005637 nuclear inner membrane | GO:0005789 endoplasmic reticulum membrane |
orf19.1743	0.413983	0.499141	0.653212	0.488855	0.387252	0.401993	ACS1	Putative acetyl-CoA synthetase, similar to S. cerevisiae Acs1p; upregulated in the presence of human neutrophils; fluconazole-downregulated; regulated by Nrg1p and Mig1p; shows colony morphology-related gene regulation by Ssn6p	GO:0006085 acetyl-CoA biosynthetic process | GO:0019654 acetate fermentation | GO:0016573 histone acetylation |	GO:0003987 acetate-CoA ligase activity |	GO:0005829 cytosol | GO:0005739 mitochondrion |
orf19.3038	0.344424	0.460966	0.77471	0.493369	0.335722	0.376039	TPS2	Trehalose-6-phosphate (Tre6P) phosphatase; mutation causes heat sensitivity, Tre6P accumulation, and decreased mouse virulence; possible drug target; two conserved phospohydrolase motifs; no human or murine homolog	GO:0005992 trehalose biosynthetic process | GO:0030448 hyphal growth | GO:0009405 pathogenesis | GO:0009408 response to heat | GO:0006979 response to oxidative stress | GO:0006970 response to osmotic stress |	GO:0004805 trehalose-phosphatase activity |	GO:0005739 mitochondrion | GO:0005946 alpha,alpha-trehalose-phosphate synthase complex (UDP-forming) |
orf19.5228	0.24834	0.345474	0.653324	0.259472	0.17445	0.217812	RIB3	3,4-Dihydroxy-2-butanone 4-phosphate synthase; homodimeric enzyme of riboflavin biosynthesis; converts ribulose 5-phosphate to L-3,4-dihydroxy-2-butanone 4-phosphate; transcription regulated on yeast-hyphal switch, macrophage interaction	GO:0009231 riboflavin biosynthetic process | GO:0009060 aerobic respiration |	GO:0008686 3,4-dihydroxy-2-butanone-4-phosphate synthase activity |	GO:0005829 cytosol | GO:0005758 mitochondrial intermembrane space |
orf19.633	0.232505	0.323947	0.619081	0.320799	0.12979	0.136975		Protein described as a putative methyltransferase; decreased expression in hyphae compared to yeast-form cells; expression regulated during planktonic growth
orf19.2292	0.399715	0.479537	0.82493	0.892662	0.585354	0.518514		Oligopeptide transporter; transcriptionally induced upon phagocytosis by macrophage; fungal-specific (no human or murine homolog); merged with orf19.176 in Assembly 20
orf19.1381	0.297965	0.336341	0.605244	0.717352	0.332068	0.318122		Predicted ORF in Assemblies 19, 20 and 21	GO:0006897 endocytosis | GO:0007015 actin filament organization |		GO:0005938 cell cortex |
orf19.5622	0.487107	0.520575	0.819834	0.82874	0.613517	0.476193	GLC3	Protein described as similar to 1,4-glucan branching enzyme; fluconazole-induced; shows colony morphology-related gene regulation by Ssn6p; protein detected by mass spec in stationary phase cultures	GO:0005978 glycogen biosynthetic process |	GO:0003844 1,4-alpha-glucan branching enzyme activity |	GO:0005737 cytoplasm |
orf19.7227	0.326861	0.313883	0.848827	0.535042	0.496422	0.452255		Predicted ORF in Assemblies 19, 20 and 21; mutation confers hypersensitivity to toxic ergosterol analog	GO:0042493 response to drug | GO:0005977 glycogen metabolic process | GO:0006470 protein amino acid dephosphorylation |	GO:0004864 phosphoprotein phosphatase inhibitor activity |	GO:0005634 nucleus |
orf19.2841	0.379128	0.313742	0.707179	0.640637	0.452648	0.426841	PGM2	Protein not essential for viability; similar to S. cerevisiae Pgm2p, which is phosphoglucomutase	GO:0006010 glucose 6-phosphate utilization | GO:0006008 glucose 1-phosphate utilization | GO:0005978 glycogen biosynthetic process | GO:0006011 UDP-glucose metabolic process | GO:0005992 trehalose biosynthetic process | GO:0019388 galactose catabolic process | GO:0006874 cellular calcium ion homeostasis |	GO:0004614 phosphoglucomutase activity |	GO:0005829 cytosol | GO:0005737 cytoplasm |
orf19.3302	0.450446	0.505573	1.03849	0.770433	0.474795	0.492235		Predicted ORF in Assemblies 19, 20 and 21; transcription downregulated upon yeast-hyphal switch; transcriptionally activated by Mnl1p under weak acid stress	GO:0000122 negative regulation of transcription from RNA polymerase II promoter | GO:0005979 regulation of glycogen biosynthetic process |		GO:0005737 cytoplasm |
orf19.1434	0.525038	0.495137	0.556298	0.498804	0.666176	0.859406		Predicted ORF in Assemblies 19, 20 and 21	GO:0006289 nucleotide-excision repair | GO:0006298 mismatch repair | GO:0006272 leading strand elongation | GO:0006273 lagging strand elongation | GO:0001934 positive regulation of protein amino acid phosphorylation | GO:0000725 recombinational repair | GO:0000076 DNA replication checkpoint | GO:0007095 mitotic cell cycle G2/M transition DNA damage checkpoint |	GO:0019209 kinase activator activity | GO:0005515 protein binding |	GO:0008622 epsilon DNA polymerase complex | GO:0031261 DNA replication preinitiation complex |
orf19.7479	0.476795	0.469627	0.541594	0.434498	0.631692	0.743894	NTH1	Neutral trehalase; hyphal induction in homozygous null mutant is delayed but not reduced overall; not required for virulence in mouse systemic infection; homodimeric enzyme; possible regulatory cAMP-dependent phosphorylation at S10 and S213	GO:0005993 trehalose catabolic process | GO:0006950 response to stress |	GO:0015927 trehalase activity | GO:0004555 alpha,alpha-trehalase activity |	GO:0005829 cytosol |
orf19.2251	0.192392	0.162336	0.287476	0.168041	0.47003	0.637023	AAH1	Protein not essential for viability; similar to S. cerevisiae Aah1p, which is an adenine deaminase involved in purine salvage and nitrogen catabolism; shows colony morphology-related gene regulation by Ssn6p; Hog1p-, biofilm-, CO2-induced	GO:0006146 adenine catabolic process | GO:0043103 hypoxanthine salvage |	GO:0000034 adenine deaminase activity |	GO:0005634 nucleus | GO:0005737 cytoplasm |
orf19.1631	0.447957	0.326358	0.348505	0.260522	0.572739	0.845635	ERG6	Delta(24)-sterol C-methyltransferase, converts zymosterol to fecosterol in ergosterol biosynthesis by methylating position C-24; mutation confers nystatin resistance; fluconazole-induced; transcription increased in azole-resistant strain	GO:0006696 ergosterol biosynthetic process | GO:0042493 response to drug |	GO:0003838 sterol 24-C-methyltransferase activity |	GO:0005783 endoplasmic reticulum | GO:0005811 lipid particle | GO:0005741 mitochondrial outer membrane | GO:0005886 plasma membrane |
orf19.6891	0.479984	0.528016	0.64057	0.422995	0.661202	0.777907	RFC1	Protein likely to be essential for growth, based on an insertional mutagenesis strategy; similar to S. cerevisiae Rfc1, which is a subunit of DNA replication factor C	GO:0006298 mismatch repair | GO:0006281 DNA repair | GO:0006272 leading strand elongation | GO:0000278 mitotic cell cycle |	GO:0003689 DNA clamp loader activity |	GO:0005663 DNA replication factor C complex |
orf19.1802	0.219357	0.255493	0.458159	0.131869	0.419292	0.49261		Predicted ORF in Assemblies 19, 20 and 21; decreased expression in response to prostaglandins	GO:0000288 nuclear-transcribed mRNA catabolic process, deadenylation-dependent decay | GO:0006415 translational termination |		GO:0005634 nucleus |
orf19.4699	0.284195	0.286703	0.44993	0.207967	0.387302	0.72037		Putative phospholipase of patatin family; similar to S. cerevisiae Ymr313p; predicted Kex2p substrate	GO:0019433 triglyceride catabolic process | GO:0007114 cell budding |	GO:0004620 phospholipase activity | GO:0004806 triglyceride lipase activity |	GO:0005811 lipid particle |
orf19.2209	0.301358	0.380017	0.515765	0.236381	0.5299	0.901787	YVC1	Protein similar to S. cerevisiae Yvc1p; transcription is repressed in response to alpha pheromone in SpiderM medium	GO:0030003 cellular cation homeostasis |	GO:0005262 calcium channel activity | GO:0005244 voltage-gated ion channel activity | GO:0005267 potassium channel activity | GO:0005227 calcium activated cation channel activity | GO:0005272 sodium channel activity |	GO:0000324 fungal-type vacuole |
orf19.6056	0.396163	0.545885	0.624536	0.443044	0.647172	0.588701		Predicted ORF in Assemblies 19, 20 and 21			GO:0005634 nucleus | GO:0005737 cytoplasm |
orf19.1756	0.139382	0.203899	0.340211	0.146996	0.362056	0.393859	GPD1	Protein similar to S. cerevisiae glycerol-3-phosphate dehydrogenase (enzyme of glycerol biosynthesis); biofilm-induced expression; regulated by Efg1p; regulated by Tsa1p, Tsa1Bp under H2O2 stress conditions	GO:0006071 glycerol metabolic process | GO:0006973 intracellular accumulation of glycerol | GO:0006116 NADH oxidation |	GO:0004367 glycerol-3-phosphate dehydrogenase (NAD+) activity |	GO:0005829 cytosol | GO:0005777 peroxisome |
orf19.656	0.429141	0.432596	0.501871	0.371639	0.580403	0.505188	DPP1	Putative diacylglycerol pyrophosphate phosphatase of diacylglycerol production for phospholipid biosynthesis; downregulation correlates with clinical development of fluconazole resistance	GO:0006644 phospholipid metabolic process |	GO:0008195 phosphatidate phosphatase activity |	GO:0005783 endoplasmic reticulum |
orf19.2525	0.339704	0.554658	0.553395	0.290448	0.508773	0.575604	LYS12	Protein described as mitochondrial homoisocitrate dehydrogenase; clade-associated gene expression; protein level decreased in stationary phase cultures	GO:0009085 lysine biosynthetic process |	GO:0047046 homoisocitrate dehydrogenase activity |	GO:0005739 mitochondrion |
orf19.4827	0.458863	0.429773	0.468275	0.306546	0.912649	0.709563	ADE12	Predicted enzyme of adenine biosynthesis; upregulated in biofilm; decreased expression in hyphae compared to yeast-form cells; not induced during GCN response, in contrast to the S. cerevisiae ortholog, which is induced by Gcn4p	GO:0046086 adenosine biosynthetic process | GO:0006164 purine nucleotide biosynthetic process |	GO:0003688 DNA replication origin binding | GO:0004019 adenylosuccinate synthase activity |	GO:0005737 cytoplasm |
orf19.3152	0.481765	0.584023	0.622632	0.389534	0.542451	0.525575	AMO2	Protein similar to A. niger predicted peroxisomal copper amino oxidase; mutation confers hypersensitivity to toxic ergosterol analog; induced upon biofilm formation	GO:0042493 response to drug |
orf19.3521	0.519584	0.588024	0.613109	0.420675	0.580863	0.47186	ARH2	Predicted ORF in Assemblies 19, 20 and 21	GO:0006879 cellular iron ion homeostasis | GO:0006784 heme a biosynthetic process |	GO:0015039 NADPH-adrenodoxin reductase activity |	GO:0005743 mitochondrial inner membrane |
orf19.1734	0.443023	0.550631	0.515386	0.428501	0.527259	0.446095		Predicted ORF in Assemblies 19, 20 and 21; heterozygous null mutant displays sensitivity to virgineone	GO:0006348 chromatin silencing at telomere | GO:0010552 positive regulation of gene-specific transcription from RNA polymerase II promoter | GO:0006281 DNA repair | GO:0042766 nucleosome mobilization | GO:0006366 transcription from RNA polymerase II promoter |	GO:0016887 ATPase activity | GO:0043140 ATP-dependent 3'-5' DNA helicase activity |	GO:0031011 Ino80 complex |
orf19.4287	0.141913	0.294726	0.461749	0.210259	0.217373	0.203545		Predicted ORF in Assemblies 19, 20 and 21; clade-associated gene expression	GO:0019650 glucose catabolic process to butanediol |	GO:0000721 (R,R)-butanediol dehydrogenase activity |	GO:0005737 cytoplasm |
orf19.542.2	0.482518	0.566333	0.649715	0.496281	0.518753	0.435333		ORF Predicted by Annotation Working Group	GO:0006461 protein complex assembly | GO:0006626 protein targeting to mitochondrion |		GO:0031307 integral to mitochondrial outer membrane |
orf19.6739	0.31666	0.334047	0.438342	0.240998	0.301678	0.361951		Predicted ORF in Assemblies 19, 20 and 21		GO:0004614 phosphoglucomutase activity |	GO:0005634 nucleus | GO:0005737 cytoplasm |
orf19.4928	0.409718	0.412694	0.521212	0.304281	0.360803	0.467291		Predicted ORF in Assemblies 19, 20 and 21	GO:0006887 exocytosis |	GO:0005085 guanyl-nucleotide exchange factor activity |	GO:0043332 mating projection tip | GO:0005829 cytosol | GO:0030133 transport vesicle |
orf19.2672	0.439521	0.436662	0.588067	0.303829	0.400921	0.453334	NCP1	NADPH-cytochrome P450 reductase, acts with Erg11p in sterol 14 alpha-demethylation in ergosterol biosynthesis; subject to hypoxic regulation; ketoconazole-induced; caspofungin repressed	GO:0042493 response to drug | GO:0006696 ergosterol biosynthetic process |	GO:0003958 NADPH-hemoprotein reductase activity | GO:0009055 electron carrier activity |	GO:0005792 microsome | GO:0005741 mitochondrial outer membrane |
orf19.434	0.35829	0.345985	0.517979	0.231677	0.256934	0.316574	PRD1	Transcription is regulated by Nrg1p, Mig1p, and Tup1p; Hog1p-induced	GO:0006508 proteolysis |	GO:0004222 metalloendopeptidase activity |	GO:0005758 mitochondrial intermembrane space |
orf19.3442	0.342795	0.289712	0.40333	0.175943	0.272863	0.424213		Predicted ORF in Assemblies 19, 20 and 21		GO:0003959 NADPH dehydrogenase activity |
orf19.118	0.343975	0.280598	0.379484	0.21601	0.300745	0.407889	FAD2	Delta-12 fatty acid desaturase, involved in production of linoleic acid, which is a major component of membranes	GO:0006636 unsaturated fatty acid biosynthetic process | GO:0009405 pathogenesis |	GO:0016720 delta12-fatty acid dehydrogenase activity |
orf19.5906	0.399606	0.44716	0.432702	0.228409	0.288654	0.374262	ADE2	Phosphoribosylaminoimadazole carboxylase; enzyme of adenine biosynthesis; required for wild-type growth and virulence in immunosuppressed mouse systemic infection; not induced during GCN response, in contrast to S. cerevisiae ortholog	GO:0046084 adenine biosynthetic process | GO:0006164 purine nucleotide biosynthetic process | GO:0009405 pathogenesis |	GO:0004638 phosphoribosylaminoimidazole carboxylase activity |	GO:0005737 cytoplasm |
orf19.6169.2	0.347215	0.37177	0.539874	0.285595	0.239573	0.401361		ORF Predicted by Annotation Working Group; fluconazole-downregulated; merged with orf19.2496 in Assembly 20
orf19.5443	0.379092	0.358692	0.606057	0.283474	0.39765	0.509119		Putative kynurenine 3-monooxygenase, involved in NAD biosynthesis; transposon mutation affects filamentous growth	GO:0030447 filamentous growth | GO:0034354 de novo NAD biosynthetic process from tryptophan |	GO:0004502 kynurenine 3-monooxygenase activity |	GO:0005741 mitochondrial outer membrane | GO:0005886 plasma membrane |
orf19.2324	0.276407	0.292751	0.45779	0.197542	0.280208	0.536644	UBA4	Predicted ORF in Assemblies 19, 20 and 21; increased expression in response to prostaglandins; clade-associated gene expression	GO:0007124 pseudohyphal growth | GO:0007114 cell budding | GO:0006464 protein modification process | GO:0001403 invasive growth in response to glucose limitation | GO:0006979 response to oxidative stress | GO:0002098 tRNA wobble uridine modification |	GO:0042292 URM1 activating enzyme activity |	GO:0005737 cytoplasm |
orf19.1889	0.254192	0.292545	0.446042	0.21908	0.254383	0.429503		Predicted ORF in Assemblies 19, 20 and 21; protein detected by mass spec in stationary phase cultures			GO:0005634 nucleus | GO:0005737 cytoplasm |
orf19.489	0.259366	0.279858	0.497116	0.257467	0.26553	0.393677	DAP1	Protein similar to S. cerevisiae Dap1p, which is a protein related to mammalian membrane-associated progesterone receptors involved in response to DNA damage; induced in core stress response; Hog1p regulated; clade-associated expression	GO:0032443 regulation of ergosterol biosynthetic process |	GO:0020037 heme binding |	GO:0005768 endosome |
orf19.7484	0.403116	0.459049	0.476969	0.379287	0.408362	0.573016	ADE1	Phosphoribosylaminoimadazole succinocarboxamide synthetase, enzyme of adenine biosynthesis; not induced during GCN response, in contrast to the S. cerevisiae ortholog; fungal-specific (no human or murine homolog)	GO:0046084 adenine biosynthetic process | GO:0006189 'de novo' IMP biosynthetic process | GO:0042493 response to drug |	GO:0004639 phosphoribosylaminoimidazolesuccinocarboxamide synthase activity |	GO:0005634 nucleus | GO:0005737 cytoplasm |
orf19.3422	0.488691	0.260706	0.432699	0.191165	0.268158	0.375868	FMP27	Predicted ORF in Assemblies 19, 20 and 21; fungal-specific (no human or murine homolog)			GO:0005739 mitochondrion |
orf19.3616	0.588115	0.487713	0.527229	0.358984	0.398621	0.568696	ERG9	Putative farnesyl-diphosphate farnesyl transferase (squalene synthase) involved in the sterol biosynthesis pathway; likely to be essential for growth; regulated by fluconazole and lovastatin; amphotericin B, caspofungin repressed	GO:0006696 ergosterol biosynthetic process |	GO:0004310 farnesyl-diphosphate farnesyltransferase activity |	GO:0005783 endoplasmic reticulum | GO:0005741 mitochondrial outer membrane | GO:0005886 plasma membrane |
orf19.250	0.547523	0.440466	0.432812	0.327292	0.341516	0.52065	SLC1	Protein repressed during the mating process	GO:0046474 glycerophospholipid biosynthetic process |	GO:0003841 1-acylglycerol-3-phosphate O-acyltransferase activity |	GO:0005811 lipid particle | GO:0005886 plasma membrane |
orf19.6274	0.51393	0.414791	0.509346	0.407851	0.391739	0.605148		Protein required for cohesion, adhesion, and biofilm formation; predicted ORF in Assemblies 19, 20 and 21	GO:0007155 cell adhesion | GO:0042710 biofilm formation |
orf19.6563.1	0.410511	0.561651	0.781831	0.332101	0.40492	0.595685		ORF Predicted by Annotation Working Group			GO:0005739 mitochondrion |
orf19.1306	0.358276	0.482952	0.62069	0.211332	0.354211	0.512893		Predicted ORF in Assemblies 19, 20 and 21
orf19.5519	0.230522	0.287709	0.551885	0.0848842	0.203728	0.3923	GCV1	Protein described as T subunit of glycine decarboxylase; transcription is negatively regulated by Sfu1p	GO:0006730 one-carbon metabolic process | GO:0006544 glycine metabolic process |	GO:0004375 glycine dehydrogenase (decarboxylating) activity |	GO:0005739 mitochondrion |
orf19.385	0.239749	0.319224	0.460657	0.111755	0.165309	0.436545	GCV2	Putative protein of glycine catabolism; downregulated by Efg1p; Hog1p-induced; upregulated by Rim101p at acid pH; transcription is activated in the presence of elevated CO2; protein detected by mass spec in stationary phase cultures	GO:0006546 glycine catabolic process | GO:0019464 glycine decarboxylation via glycine cleavage system | GO:0006730 one-carbon metabolic process |	GO:0004375 glycine dehydrogenase (decarboxylating) activity |	GO:0005739 mitochondrion |
orf19.406	0.135551	0.207205	0.428747	0.080719	0.131409	0.371943	ERG1	Squalene epoxidase, catalyzes epoxidation of squalene to 2,3(S)-oxidosqualene in the ergosterol biosynthetic pathway; essential; target of allylamine antifungal drugs; uses NADH as a reducing cofactor, while S. cerevisiae Erg1p uses NADPH	GO:0006696 ergosterol biosynthetic process | GO:0030448 hyphal growth | GO:0051668 localization within membrane | GO:0042493 response to drug |	GO:0004506 squalene monooxygenase activity | GO:0008144 drug binding |	GO:0005851 eukaryotic translation initiation factor 2B complex | GO:0005626 insoluble fraction | GO:0005783 endoplasmic reticulum | GO:0005811 lipid particle | GO:0005886 plasma membrane |
orf19.5838	0.511195	0.55231	0.603171	0.254229	0.461585	0.676721		Predicted ORF in Assemblies 19, 20 and 21	GO:0009070 serine family amino acid biosynthetic process |	GO:0004647 phosphoserine phosphatase activity |	GO:0005634 nucleus | GO:0005737 cytoplasm |
orf19.492	0.495394	0.550093	0.608997	0.295169	0.448043	0.691122	ADE17	Enzyme of adenine biosynthesis; antigenic in human; soluble protein in hyphae; not induced during GCN response, in contrast to the S. cerevisiae ortholog	GO:0006189 'de novo' IMP biosynthetic process |	GO:0004643 phosphoribosylaminoimidazolecarboxamide formyltransferase activity | GO:0003937 IMP cyclohydrolase activity |	GO:0005625 soluble fraction | GO:0005829 cytosol | GO:0001950 plasma membrane enriched fraction |
orf19.2286	0.483972	0.47652	0.49291	0.196298	0.353023	0.650966		Predicted ORF in Assemblies 19, 20 and 21; ketoconazole-induced; protein level decreased in stationary phase cultures	GO:0000226 microtubule cytoskeleton organization | GO:0008612 peptidyl-lysine modification to hypusine |	GO:0019135 deoxyhypusine monooxygenase activity |	GO:0005634 nucleus | GO:0005737 cytoplasm |
orf19.5136	0.618849	0.492613	0.679517	0.311816	0.529325	0.84748		Predicted ORF in Assemblies 19, 20 and 21			GO:0005634 nucleus | GO:0005737 cytoplasm |
orf19.3277	0.788833	0.459215	0.533867	0.678571	0.469995	0.691668		Predicted ORF in Assemblies 19, 20 and 21
orf19.7586	0.639631	0.241072	0.140373	0.301265	0.14262	0.352341	CHT3	Chitinase, major; functional homolog of S. cerevisiae Cts1p; 4 N-glycosylation motifs; possible O-mannosylated region; putative signal peptide; hyphal-repressed; farnesol upregulated in biofilm; regulated by Efg1p, Cyr1p, Ras1p	GO:0000282 cellular bud site selection | GO:0007109 cytokinesis, completion of separation |	GO:0004568 chitinase activity | GO:0008843 endochitinase activity |	GO:0009986 cell surface | GO:0009277 fungal-type cell wall | GO:0005576 extracellular region | GO:0005635 nuclear envelope | GO:0005783 endoplasmic reticulum |
orf19.5267	0.495516	0.150927	0.101643	0.16894	0.115737	0.307925		Putative cell wall protein; downregulated in core caspofungin response; transcription is repressed in response to alpha pheromone in SpiderM medium; transcription repressed in ace2 null mutant			GO:0005618 cell wall |
orf19.4608	0.770196	0.485099	0.477367	0.621793	0.516251	0.573032	PDC12	Putative pyruvate decarboxylase; fungal-specific (no human or murine homolog)	GO:0006090 pyruvate metabolic process | GO:0019655 glucose catabolic process to ethanol |	GO:0004737 pyruvate decarboxylase activity |
orf19.4659	0.633525	0.432699	0.414793	0.481031	0.457727	0.620228		Predicted ORF in Assemblies 19, 20 and 21	GO:0000398 nuclear mRNA splicing, via spliceosome |	GO:0003723 RNA binding |	GO:0005686 U2 snRNP |
orf19.2706	0.521873	0.222732	0.232721	0.283083	0.366806	0.475909	CRH11	Putative ortholog of S. cerevisiae Crh1p; predicted glycosyl hydrolase domain; similar to Csf4p, to antigenic Aspergillus fumigatus Aspf9; predicted Kex2p substrate; putative GPI-anchor; localizes to cell wall; caspofungin-induced	GO:0007047 cell wall organization |		GO:0030445 yeast-form cell wall | GO:0009986 cell surface | GO:0009277 fungal-type cell wall | GO:0030446 hyphal cell wall | GO:0000131 incipient cellular bud site | GO:0046658 anchored to plasma membrane |
orf19.3678	0.890144	0.499331	0.468782	0.800999	0.443108	0.607584		Protein not essential for viability
orf19.2252	0.807267	0.492066	0.371619	0.541013	0.288518	0.390282		Predicted ORF in Assemblies 19, 20 and 21
orf19.3914	0.737592	0.545381	0.456553	0.519829	0.469675	0.463641		Predicted ORF in Assemblies 19, 20 and 21	GO:0006413 translational initiation |	GO:0003743 translation initiation factor activity |	GO:0005840 ribosome | GO:0005634 nucleus |
orf19.4825	0.657406	0.298567	0.300104	0.528785	0.272709	0.236878		Predicted ORF in Assemblies 19, 20 and 21	GO:0006461 protein complex assembly |		GO:0005739 mitochondrion |
orf19.7466	0.817746	0.272375	0.272884	0.527822	0.293031	0.312121	ACC1	Protein with similarity to acetyl-coenzyme-A carboxylases; regulated by Efg1p; amphotericin B repressed; caspofungin repressed; intron in 5'-UTR	GO:0006998 nuclear envelope organization | GO:0006633 fatty acid biosynthetic process | GO:0006606 protein import into nucleus |	GO:0003989 acetyl-CoA carboxylase activity | GO:0004075 biotin carboxylase activity |	GO:0005829 cytosol | GO:0005739 mitochondrion | GO:0005789 endoplasmic reticulum membrane |
orf19.3380	0.56557	0.448412	0.419655	0.818335	0.55837	0.55335	HWP2	Putative GPI-anchored protein; cell wall localization predicted; hyphal-specific expression; regulated by Efg1p, Tup1p; has similarity to Hwp1p, Ece2p, Rbt1p domains; predicted signal sequence and O-glycosylation	GO:0009405 pathogenesis | GO:0030447 filamentous growth |		GO:0009986 cell surface | GO:0009277 fungal-type cell wall |
orf19.7149	0.34687	0.280387	0.258826	0.585395	0.309884	0.269863		Predicted ORF in Assemblies 19, 20 and 21
orf19.54	0.410319	0.320671	0.343666	0.87884	0.36197	0.318456	RHD1	Putative beta-mannosyltransferase, required for the addition of beta-mannose to the acid-labile fraction of cell wall phosphopeptidomannan; member of a 9-gene family; transcriptionally regulated on yeast-hyphal and white-opaque switches	GO:0070135 beta-1,2-oligomannoside metabolic process |		GO:0016021 integral to membrane |
orf19.38	0.435599	0.293519	0.418592	0.668328	0.362517	0.386787		Predicted ORF from Assembly 19; possibly spurious ORF (Annotation Working Group prediction); removed from Assembly 20
orf19.2121	0.309254	0.145655	0.237386	0.448164	0.151894	0.179797		Predicted ORF from Assembly 19; merged with orf19.1097 in Assembly 20
orf19.1448	0.623772	0.44218	0.549919	0.846872	0.383524	0.552367	APT1	Predicted ORF in Assemblies 19, 20 and 21; flucytosine induced; repressed by nitric oxide; protein level decreased in stationary phase cultures	GO:0006167 AMP biosynthetic process | GO:0006168 adenine salvage |	GO:0003999 adenine phosphoribosyltransferase activity |	GO:0005634 nucleus | GO:0005737 cytoplasm |
orf19.1562	0.520614	0.203687	0.233957	0.979077	0.262342	0.451264		Predicted ORF in Assemblies 19, 20 and 21; transcription is repressed in response to alpha pheromone in SpiderM medium
orf19.701	0.480847	0.312665	0.23765	0.536225	0.330141	0.631493	CFL11	Predicted ORF in Assemblies 19, 20 and 21; similar to ferric reductase Fre10p; flucytosine repressed; possibly adherence-induced	GO:0015892 siderophore-iron transport |	GO:0000293 ferric-chelate reductase activity |	GO:0005886 plasma membrane |
orf19.10	0.660923	0.382704	0.362898	0.75536	0.43479	0.665628	ALK8	Alkane-inducible cytochrome P450; catalyzes hydroxylation of lauric acid to hydroxylauric acid; overproduction causes fluconazole resistance in a wild-type background and causes multidrug resistance in a cdr1 cdr2 double mutant background	GO:0048252 lauric acid metabolic process | GO:0042493 response to drug | GO:0010430 fatty acid omega-oxidation |	GO:0019825 oxygen binding | GO:0020037 heme binding | GO:0008393 fatty acid (omega-1)-hydroxylase activity |	GO:0030176 integral to endoplasmic reticulum membrane |
orf19.1146	0.640955	0.459156	0.382327	0.670749	0.600961	0.542191		Predicted ORF in Assemblies 19, 20 and 21
orf19.5679	0.450263	0.432718	0.303184	0.512256	0.560047	0.359627		Predicted ORF from Assembly 19; merged with orf19.980 in Assembly 20
orf19.1893	0.793483	0.491231	0.431673	0.62436	0.788775	0.665026		Predicted ORF in Assemblies 19, 20 and 21
orf19.3145.4	0.380741	0.193177	0.210069	0.676097	0.703327	0.293214		ORF Predicted by Annotation Working Group; removed from Assembly 20
orf19.4783	0.388694	0.789418	0.556273	0.613509	0.380598	0.530702		Predicted ORF in Assemblies 19, 20 and 21
orf19.1257	0.847953	0.565316	0.688137	0.346582	0.388388	0.420216		Predicted ORF in Assemblies 19, 20 and 21
orf19.5879	0.831125	0.799541	0.701799	0.487036	0.472179	0.501332		Predicted ORF in Assemblies 19, 20 and 21	GO:0006654 phosphatidic acid biosynthetic process |	GO:0000140 acylglycerone-phosphate reductase activity |	GO:0005811 lipid particle | GO:0005783 endoplasmic reticulum |
orf19.3810	0.379562	0.383993	0.510132	0.0620123	0.0537744	0.194339		Predicted ORF in Assemblies 19, 20 and 21	GO:0009396 folic acid and derivative biosynthetic process | GO:0009113 purine base biosynthetic process | GO:0006730 one-carbon metabolic process |	GO:0004487 methylenetetrahydrofolate dehydrogenase (NAD+) activity |	GO:0005829 cytosol |
orf19.516	0.755517	0.669689	0.734295	0.330399	0.369728	0.45454		Predicted ORF in Assemblies 19, 20 and 21	GO:0007049 cell cycle | GO:0034203 glycolipid translocation | GO:0006487 protein amino acid N-linked glycosylation |		GO:0005789 endoplasmic reticulum membrane |
orf19.2419	0.50995	0.611846	0.695174	0.0881532	0.0907264	0.1132		Predicted ORF in Assemblies 19, 20 and 21	GO:0007126 meiosis | GO:0030437 ascospore formation | GO:0006412 translation | GO:0007124 pseudohyphal growth | GO:0000294 nuclear-transcribed mRNA catabolic process, endonucleolytic cleavage-dependent decay |	GO:0004521 endoribonuclease activity |	GO:0005737 cytoplasm |
orf19.4856	0.490168	0.366487	0.548291	0.241517	0.322338	0.325119	LIP3	Secreted lipase, member of a lipase gene family whose members are expressed differentially in response to carbon source and during infection; may have a role in nutrition and/or in creating an acidic microenvironment	GO:0016042 lipid catabolic process |	GO:0016298 lipase activity |	GO:0005576 extracellular region |
orf19.1610	0.576122	0.536169	0.610614	0.394915	0.377773	0.415548		Putative protein of unknown function, transcription is activated in the presence of elevated CO2; predicted ORF in Assemblies 19, 20 and 21
orf19.6817	0.592977	0.600444	0.669973	0.327905	0.405727	0.455959	FCR1	Putative zinc cluster transcription factor; negative regulator of fluconazole, ketoconazole, brefeldin A resistance; transposon mutation affects filamentous growth; partially suppresses S. cerevisiae pdr1 pdr3 mutant fluconazole sensitivity	GO:0042493 response to drug | GO:0030447 filamentous growth | GO:0006355 regulation of transcription, DNA-dependent |	GO:0017076 purine nucleotide binding | GO:0003700 transcription factor activity |	GO:0005634 nucleus |
orf19.4215	0.448259	0.372086	0.495558	0.192697	0.253509	0.4188	FET34	Protein similar to multicopper ferroxidase; expression greater in low iron and reduced in a fluconazole-resistant isolate; downregulated by Sfu1p, Hog1p; alkaline upregulated by Rim101p; ciclopirox olamine induced	GO:0033215 iron assimilation by reduction and transport | GO:0046688 response to copper ion | GO:0006827 high-affinity iron ion transport |	GO:0004322 ferroxidase activity | GO:0005381 iron ion transmembrane transporter activity |	GO:0005624 membrane fraction | GO:0033573 high affinity iron permease complex |
orf19.5750	0.436233	0.418893	0.656212	0.226872	0.252938	0.437636	SHM2	Cytoplasmic serine hydroxymethyltransferase; complements the glycine auxotrophy of an S. cerevisiae shm1 null shm2 null gly1-1 triple mutant; antigenic in human; soluble protein in hyphae; farnesol-upregulated in biofilm	GO:0006730 one-carbon metabolic process | GO:0006544 glycine metabolic process |	GO:0004372 glycine hydroxymethyltransferase activity |	GO:0005737 cytoplasm | GO:0005625 soluble fraction | GO:0043332 mating projection tip | GO:0001950 plasma membrane enriched fraction |
orf19.2593	0.711434	0.671859	0.633135	0.466738	0.422142	0.640548	BIO2	Protein described as biotin synthase; transcriptionally upregulated in high iron; transcription is downregulated in response to treatment with ciclopirox olamine; upregulated in clinical isolates from HIV+ patients with oral candidiasis	GO:0009102 biotin biosynthetic process |	GO:0004076 biotin synthase activity |	GO:0005739 mitochondrion |
orf19.5203	0.655279	0.649892	0.681174	0.390317	0.403328	0.687291		Predicted ORF in Assemblies 19, 20 and 21
orf19.5061	0.492152	0.419422	0.52503	0.206793	0.218797	0.446397	ADE5,7	Enzyme of adenine biosynthesis; interacts with Vps34p; required for hyphal growth and virulence; flucytosine induced; not induced during GCN response, in contrast to the S. cerevisiae ortholog
orf19.4681	0.691113	0.66282	0.627985	0.336403	0.38749	0.599899	RAT1	5'-->3' exoribonuclease; similar to S. cerevisiae nuclear exoribonuclease Rat1p; suppresses S. cerevisiae kem1 mutant slow growth, mating defect, and haploid invasive growth defect	GO:0006364 rRNA processing | GO:0030846 termination of RNA polymerase II transcription, poly(A)-coupled |	GO:0000150 recombinase activity | GO:0008017 microtubule binding | GO:0004534 5'-3' exoribonuclease activity |	GO:0005739 mitochondrion | GO:0005634 nucleus |
orf19.5455	0.774424	0.786993	0.74876	0.43974	0.457467	0.653642		Predicted ORF in Assemblies 19, 20 and 21	GO:0016237 microautophagy | GO:0007034 vacuolar transport | GO:0042144 vacuole fusion, non-autophagic |		GO:0033254 vacuolar transporter chaperone complex | GO:0031310 intrinsic to vacuolar membrane | GO:0005783 endoplasmic reticulum |
orf19.2364	0.728622	0.63499	0.579714	0.324791	0.51849	0.479226	MIS11	Similar to precursor of mitochondrial C1-tetrahydrofolate synthase; putative protein of glycine catabolism; downregulated by Efg1p; fluconazole-induced; protein detected by mass spec in stationary phase cultures	GO:0006546 glycine catabolic process | GO:0046656 folic acid biosynthetic process |	GO:0004477 methenyltetrahydrofolate cyclohydrolase activity | GO:0004329 formate-tetrahydrofolate ligase activity | GO:0004488 methylenetetrahydrofolate dehydrogenase (NADP+) activity | GO:0004479 methionyl-tRNA formyltransferase activity |	GO:0005739 mitochondrion |
orf19.6118	0.707008	0.523218	0.566227	0.467963	0.369828	0.762986		Putative protein of unknown function, transcription is positively regulated by Tbf1p; predicted ORF in Assemblies 19, 20 and 21	GO:0006892 post-Golgi vesicle-mediated transport |	GO:0005085 guanyl-nucleotide exchange factor activity | GO:0008270 zinc ion binding |	GO:0005625 soluble fraction | GO:0005624 membrane fraction |
orf19.2129	0.654512	0.567214	0.648752	0.473589	0.366748	0.556832		Predicted ORF in Assemblies 19, 20 and 21	GO:0030476 ascospore wall assembly |		GO:0005619 ascospore wall |
orf19.5006	0.486439	0.402999	0.479363	0.326772	0.234929	0.524718	GCV3	Predicted ORF in Assemblies 19, 20 and 21; protein level decreased in stationary phase cultures	GO:0006546 glycine catabolic process | GO:0006730 one-carbon metabolic process |	GO:0004375 glycine dehydrogenase (decarboxylating) activity |	GO:0005739 mitochondrion |
orf19.657	0.689759	0.52556	0.542277	0.492466	0.293733	0.610659	SAM2	S-adenosylmethionine synthetase, localizes to surface of hyphal cells, but not yeast-form cells; possible biofilm-induced expression (reports differ); alkaline upregulated; Hog1p-induced; farnesol-downregulated	GO:0006556 S-adenosylmethionine biosynthetic process | GO:0006555 methionine metabolic process |	GO:0004478 methionine adenosyltransferase activity |	GO:0030446 hyphal cell wall | GO:0009986 cell surface | GO:0005886 plasma membrane |
orf19.5063	0.823462	0.509688	0.677729	0.414308	0.390032	0.648089		Predicted ORF in Assemblies 19, 20 and 21; ciclopirox olamine induced; regulated by Ssn6p; induced by nitric oxide in yhb1 mutant
orf19.6881	0.925539	0.481313	0.490684	0.376311	0.335601	0.392368	YTH1	Protein described as an mRNA cleavage and polyadenylation specificity factor; transcription is regulated upon yeast-hyphal switch; decreased expression in hyphae compared to yeast-form cells; fluconazole or flucytosine induced	GO:0006379 mRNA cleavage | GO:0006378 mRNA polyadenylation | GO:0042493 response to drug |	GO:0003723 RNA binding |	GO:0005847 mRNA cleavage and polyadenylation specificity factor complex |
orf19.1507	0.897362	0.512069	0.357263	0.307792	0.214712	0.268982		Predicted ORF in Assemblies 19, 20 and 21; Plc1p-regulated	GO:0007093 mitotic cell cycle checkpoint | GO:0001100 negative regulation of exit from mitosis |	GO:0005515 protein binding |	GO:0005933 cellular bud | GO:0005634 nucleus | GO:0005737 cytoplasm |
orf19.6569	0.596206	0.577708	0.556316	0.498013	0.397341	0.499549		Predicted ORF in Assemblies 19, 20 and 21
orf19.3332	0.555064	0.558634	0.590478	0.511326	0.406336	0.459009		Predicted ORF in Assemblies 19, 20 and 21	GO:0006897 endocytosis |		GO:0016021 integral to membrane |
orf19.6967	0.607563	0.575101	0.54362	0.403696	0.409656	0.349019	USO6	Transcription is induced upon filamentous growth	GO:0006461 protein complex assembly | GO:0006888 ER to Golgi vesicle-mediated transport |		GO:0005625 soluble fraction |
orf19.7166	0.550194	0.478821	0.332476	0.392962	0.250301	0.219467		Predicted ORF in Assemblies 19, 20 and 21; increased transcription is observed in an azole-resistant strain that overexpresses MDR1; transcriptionally activated by Mnl1p under weak acid stress
orf19.4975	0.696587	0.753506	0.862801	0.400576	0.600869	0.495235	HYR1	Nonessential, GPI anchored, predicted cell wall protein; macrophage-induced protein; induced in hyphae; induction associated with azole resistance; regulated by Rfg1p, Efg1p, Nrg1p, Tup1p, Cyr1p			GO:0009986 cell surface | GO:0046658 anchored to plasma membrane | GO:0009277 fungal-type cell wall | GO:0005576 extracellular region |
orf19.543	0.474328	0.510141	0.817366	0.334978	0.466025	0.423664	FUM11	Protein described as fumarate hydratase; transcriptionally regulated by iron; expression greater in high iron; protein detected by mass spec in exponential and stationary phase cultures	GO:0006099 tricarboxylic acid cycle | GO:0006106 fumarate metabolic process |	GO:0004333 fumarate hydratase activity |	GO:0005829 cytosol | GO:0005759 mitochondrial matrix |
orf19.1353	0.656964	0.387552	0.780822	0.561103	0.434246	0.719482		Predicted ORF in Assemblies 19, 20 and 21; transcription downregulated upon yeast-hyphal switch; Ras1p-regulated
orf19.4673	0.664861	0.437569	0.767522	0.5675	0.478327	0.613125	BMT9	Putative beta-mannosyltransferase, member of a 9-gene family that includes characterized genes BMT1, BMT2, BMT3, and BMT4 with roles in beta-1,2-mannosylation of cell wall phosphopeptidomannan; predicted ORF in Assemblies 19, 20 and 21
orf19.5117	0.742345	0.423811	0.804767	0.791951	0.310415	0.733238	OLE1	Fatty acid desaturase (stearoyl-CoA desaturase), essential protein involved in oleic acid synthesis; required for aerobic hyphal growth and chlamydospore formation; subject to hypoxic regulation; fluconazole-induced; caspofungin repressed	GO:0030448 hyphal growth | GO:0001410 chlamydospore formation | GO:0006636 unsaturated fatty acid biosynthetic process | GO:0000001 mitochondrion inheritance |	GO:0004768 stearoyl-CoA 9-desaturase activity |	GO:0005783 endoplasmic reticulum | GO:0005789 endoplasmic reticulum membrane |
orf19.5902	0.310712	0.297062	0.916472	0.722967	0.281452	0.581499	RAS2	Protein similar to S. cerevisiae Ras2p, which activates adenylate cyclase and is involved in pseudohyphal growth of S. cerevisiae; transposon mutation affects filamentous growth	GO:0030447 filamentous growth | GO:0008283 cell proliferation | GO:0007265 Ras protein signal transduction | GO:0007189 activation of adenylate cyclase activity by G-protein signaling pathway |	GO:0003924 GTPase activity |	GO:0005886 plasma membrane |
orf19.6882	0.226035	0.230622	1.04825	0.485233	0.330864	0.883404	OSM1	Putative flavoprotein subunit of fumarate reductase; soluble protein in hyphae; fungal-specific (no human or murine homolog); caspofungin repressed; protein detected by mass spec in stationary phase cultures	GO:0008152 metabolic process |		GO:0005625 soluble fraction |
orf19.1290	0.363511	0.45565	0.935177	0.442499	0.466832	0.455812	XKS1	Predicted ORF in Assemblies 19, 20 and 21; increased expression in response to prostaglandins	GO:0005998 xylulose catabolic process |	GO:0004856 xylulokinase activity |	GO:0005737 cytoplasm |
orf19.5323	0.437966	0.621337	0.869146	0.486649	0.514235	0.541422	MDH1-3	Predicted malate dehydrogenase; farnesol regulated	GO:0006108 malate metabolic process | GO:0006097 glyoxylate cycle | GO:0006635 fatty acid beta-oxidation | GO:0006735 NADH regeneration |	GO:0004470 malic enzyme activity |	GO:0005782 peroxisomal matrix |
orf19.1788	0.217145	0.452626	0.987708	0.387675	0.339498	0.423618		Predicted ORF from Assembly 19; merged with orf19.1290 in Assembly 20
orf19.3641	0.235502	0.450108	0.979221	0.555816	0.385715	0.380233		Expression is regulated upon white-opaque switching; merged with orf19.84 in Assembly 20
orf19.2048	0.0692664	0.324351	1.16676	0.523963	0.300735	0.330795		Transcription is positively regulated by Sfu1p
orf19.84	0.283095	0.505664	0.981887	0.587229	0.761521	0.371015	CAN3	Predicted ORF in Assemblies 19, 20 and 21; expression is regulated upon white-opaque switching	GO:0015802 basic amino acid transport |	GO:0015174 basic amino acid transmembrane transporter activity |	GO:0005886 plasma membrane |
orf19.2866	0.374459	0.417809	0.681507	0.448312	0.663956	0.81892		Predicted ORF in Assemblies 19, 20 and 21
orf19.3363	0.309998	0.377849	0.678997	0.465474	0.611673	0.771057	VTC4	Protein described as polyphosphate synthetase; decreased expression in hyphae compared to yeast-form cells; fungal-specific (no human or murine homolog); virulence-group-correlated expression	GO:0016237 microautophagy | GO:0007034 vacuolar transport | GO:0042144 vacuole fusion, non-autophagic |		GO:0033254 vacuolar transporter chaperone complex | GO:0031310 intrinsic to vacuolar membrane | GO:0005783 endoplasmic reticulum |
orf19.2261	0.213624	0.20823	0.518427	0.222673	0.404382	0.713618		Predicted ORF in Assemblies 19, 20 and 21	GO:0000398 nuclear mRNA splicing, via spliceosome |	GO:0003723 RNA binding | GO:0031202 RNA splicing factor activity, transesterification mechanism |	GO:0005686 U2 snRNP |
orf19.4777	0.105307	0.141738	0.585692	0.131332	0.471341	0.536269	DAK2	Protein described as similar to dihydroxyacetone kinase; transcription is decreased upon yeast-hyphal switch; fluconazole-induced; caspofungin repressed; protein detected by mass spec in stationary phase cultures	GO:0019563 glycerol catabolic process | GO:0006950 response to stress |	GO:0004371 glycerone kinase activity |
orf19.7251	0.53342	0.409852	0.699636	0.46152	0.691426	1.00363	WSC4	Transcription is specific to white cell type	GO:0009408 response to heat | GO:0007047 cell wall organization | GO:0007266 Rho protein signal transduction |		GO:0005624 membrane fraction |
orf19.6937	0.20518	0.209242	0.475318	0.228026	0.572515	0.966264	PTR2	Putative oligopeptide transporter; regulated by Stp2p and Stp3p; transcriptionally induced upon phagocytosis by macrophage; downregulated by Rim101p at pH 8	GO:0006857 oligopeptide transport | GO:0042939 tripeptide transport | GO:0042938 dipeptide transport |	GO:0015198 oligopeptide transporter activity | GO:0042937 tripeptide transporter activity | GO:0042936 dipeptide transporter activity |	GO:0005624 membrane fraction | GO:0005886 plasma membrane |
orf19.5602	0.519822	0.429514	0.818363	0.426015	0.630764	1.14314	BMT6	Putative beta-mannosyltransferase, member of a 9-gene family that includes characterized genes BMT1, BMT2, BMT3, and BMT4 with roles in beta-1,2-mannosylation of cell wall phosphopeptidomannan; predicted ORF in Assemblies 19, 20 and 21
orf19.57	0.365379	0.373002	0.64937	0.406835	0.908	1.29499	PSF2	Predicted ORF in Assemblies 19, 20 and 21	GO:0006261 DNA-dependent DNA replication |		GO:0031261 DNA replication preinitiation complex | GO:0000811 GINS complex |
orf19.1616	0.385958	0.419743	0.824681	0.51722	0.768642	1.06734	FGR23	Protein lacking an ortholog in S. cerevisiae; transposon mutation affects filamentous growth; transcriptionally repressed by A1p and Alpha2p in white-phase cells, a-specific and induced by alpha factor	GO:0030447 filamentous growth |		GO:0009986 cell surface |
orf19.5437	0.19056	0.387395	0.684755	0.236795	0.780073	0.937523	RHR2	Putative glycerol 3-phosphatase; roles in osmotic tolerance, glycerol accumulation in response to salt; regulated by macrophage, stress response, yeast-hyphal switch, pheromone, GCN4, HOG1, NRG1, TUP1; antigenic in murine systemic infection	GO:0006071 glycerol metabolic process | GO:0006970 response to osmotic stress | GO:0006114 glycerol biosynthetic process | GO:0042493 response to drug |	GO:0016791 phosphatase activity | GO:0043136 glycerol-3-phosphatase activity | GO:0000121 glycerol-1-phosphatase activity |	GO:0005625 soluble fraction | GO:0005634 nucleus | GO:0005737 cytoplasm |
orf19.768	0.302941	0.359932	0.780667	0.244238	0.485877	0.631779	SYG1	Protein not essential for viability; similar to S. cerevisiae Syg1p, which is a plasma membrane protein that may be involved in signal transduction	GO:0007165 signal transduction |		GO:0005739 mitochondrion | GO:0005886 plasma membrane |
orf19.4580	0.261412	0.353579	0.603553	0.209728	0.397913	0.625245		Predicted ORF in Assemblies 19, 20 and 21
orf19.550	0.17308	0.18563	0.495681	0.104094	0.260838	0.556105	PDX3	Transcription is regulated upon yeast-hyphal switch; regulated by Nrg1p, Mig1p, and Tup1p; caspofungin repressed; protein detected by mass spec in exponential and stationary phase cultures	GO:0006631 fatty acid metabolic process |	GO:0004733 pyridoxamine-phosphate oxidase activity |
orf19.3656	0.184583	0.287888	0.724272	0.131704	0.257848	0.55132	COX15	Transcription is regulated by Nrg1p and Tup1p; alkaline downregulated	GO:0008535 respiratory chain complex IV assembly | GO:0006784 heme a biosynthetic process |	GO:0016653 oxidoreductase activity, acting on NADH or NADPH, heme protein as acceptor |	GO:0005743 mitochondrial inner membrane | GO:0005886 plasma membrane |
orf19.7325	0.359057	0.413418	0.812638	0.333411	0.416138	0.745217		Predicted ORF in Assemblies 19, 20 and 21	GO:0006825 copper ion transport | GO:0006461 protein complex assembly |	GO:0005507 copper ion binding |	GO:0005743 mitochondrial inner membrane | GO:0005886 plasma membrane |
orf19.7323	0.367004	0.580069	0.902437	0.34544	0.530838	0.731818	CBP1	Corticosteroid binding protein; transcription induced at late log-phase or upon adherence to polystyrene; not induced by corticosterone; contains a possible NAD/FAD binding region; regulated by Nrg1p, Tup1p	GO:0015940 pantothenate biosynthetic process |	GO:0005496 steroid binding |	GO:0005737 cytoplasm |
orf19.4631	0.154146	0.34189	0.571916	0.171156	0.287552	0.613161	ERG251	Predicted ORF in Assemblies 19, 20 and 21; ketoconazole-induced; amphotericin B, caspofungin repressed	GO:0006696 ergosterol biosynthetic process |	GO:0000254 C-4 methylsterol oxidase activity |	GO:0005886 plasma membrane | GO:0005789 endoplasmic reticulum membrane |
orf19.3822	0.366793	0.457861	0.957261	0.275926	0.498757	0.561275	SCS7	Protein described as ceramide hydroxylase; transcription is regulated by Nrg1p; transcriptionally regulated by iron; expression greater in high iron; fluconazole-induced	GO:0000038 very-long-chain fatty acid metabolic process | GO:0006665 sphingolipid metabolic process |	GO:0000170 sphingosine hydroxylase activity |	GO:0005624 membrane fraction | GO:0005783 endoplasmic reticulum |
orf19.5818	0.140396	0.217801	0.719147	0.148616	0.400326	0.838329	SUR2	Protein described as similar to ceramide hydroxylase; predicted enzyme of sphingolipid biosynthesis; upregulated in biofilm; regulated by Tsa1p, Tsa1Bp under H2O2 stress conditions	GO:0006665 sphingolipid metabolic process |	GO:0000170 sphingosine hydroxylase activity |	GO:0005783 endoplasmic reticulum | GO:0005789 endoplasmic reticulum membrane |
orf19.2020	0.081914	0.133458	1.06175	0.114208	0.193998	0.947566	HGT6	Putative glucose transporter of major facilitator superfamily; 20 members of C. albicans glucose transporter family; 12 probable membrane-spanning segments; core stress response, fluconazole-induced; expressed in rich medium with 2% glucose	GO:0015758 glucose transport | GO:0008643 carbohydrate transport |	GO:0005355 glucose transmembrane transporter activity | GO:0015578 mannose transmembrane transporter activity | GO:0005353 fructose transmembrane transporter activity | GO:0015146 pentose transmembrane transporter activity | GO:0051119 sugar transmembrane transporter activity |	GO:0005887 integral to plasma membrane | GO:0005624 membrane fraction | GO:0001950 plasma membrane enriched fraction | GO:0005739 mitochondrion | GO:0016020 membrane | GO:0005886 plasma membrane |
orf19.2333	0.394259	0.496496	1.3962	0.364843	0.450077	0.768913		Predicted ORF in Assemblies 19, 20 and 21			GO:0005737 cytoplasm |
orf19.1868	0.212094	0.168616	1.30671	0.0984226	0.315784	0.61303	RNR22	Protein described as ribonucleoside diphosphate reductase; shows colony morphology-related gene regulation by Ssn6p; RNA abundance regulated by tyrosol and cell density	GO:0006260 DNA replication |	GO:0004748 ribonucleoside-diphosphate reductase activity |	GO:0005829 cytosol |
orf19.3707	0.149353	0.617501	1.12811	0.218132	0.238653	0.687469	YHB1	Nitric oxide dioxygenase; acts in nitric oxide scavenging/detoxification; role in virulence in mouse; not essential for viability; similar to S. cerevisiae Yhb1p; transcription activated by NO, macrophage interaction; hyphal downregulated	GO:0009405 pathogenesis | GO:0009636 response to toxin | GO:0046210 nitric oxide catabolic process | GO:0052565 response to defense-related host nitric oxide production | GO:0006950 response to stress |	GO:0008941 nitric oxide dioxygenase activity | GO:0016966 nitric oxide reductase activity |	GO:0005829 cytosol | GO:0005759 mitochondrial matrix |
orf19.1961	0.386882	0.427534	0.672606	0.162053	0.716496	0.892478		Predicted ORF in Assemblies 19, 20 and 21
orf19.1172	0.558584	0.42248	0.52313	0.103566	0.405389	0.891454		Protein similar to phosphate transporters; regulated upon white-opaque switching or biofilm formation; Hog1p, ciclopirox olamine or alkaline induced; caspofungin or stress repressed; merged with orf19.655 in Assembly 20
orf19.2454	0.438026	0.773667	0.901141	0.345464	0.786309	1.1157	PHO87	Protein similar to phosphate permeases; transcription is negatively regulated by Rim101p at pH 8; expression is regulated upon white-opaque switching; caspofungin repressed; biofilm-regulated; virulence-group-correlated expression	GO:0006817 phosphate transport |	GO:0015114 phosphate transmembrane transporter activity |	GO:0016020 membrane |
orf19.5114.1	0.242906	1.02588	1.6412	0.150787	0.423117	1.3526		ORF added to Assembly 21 based on comparative genome analysis
orf19.2659	0.37886	0.563277	1.88221	0.213943	0.684293	1.0593		Predicted ORF from Assembly 19; downregulation correlates with clinical development of fluconazole resistance; decreased expression in hyphae compared to yeast-form cells; Ras1p-regulated; merged with orf19.1354 in Assembly 20
orf19.1354	0.411407	0.416051	1.44286	0.136053	0.474022	1.21507	UCF1	Transcriptionally regulated by iron or by yeast-hyphal switch; expression greater in high iron, decreased upon yeast-hyphal switch; downregulation correlates with clinical development of fluconazole resistance; Ras1p-regulated			GO:0005634 nucleus | GO:0005737 cytoplasm |
orf19.5343	0.725979	0.346289	0.255087	0.932699	0.614194	0.920188	ASH1	GATA-like transcription factor; localizes to nuclei of daughter cells and hyphal tip cells; required for wild-type virulence but not kidney colonization in a mouse model of systemic infection; required for wild-type filamentous growth	GO:0030447 filamentous growth | GO:0009405 pathogenesis | GO:0000122 negative regulation of transcription from RNA polymerase II promoter | GO:0007124 pseudohyphal growth |	GO:0003700 transcription factor activity | GO:0016564 transcription repressor activity | GO:0016566 specific transcriptional repressor activity |	GO:0005634 nucleus |
orf19.7104	0.741545	0.336535	0.325673	0.677064	0.609877	0.902009		Predicted ORF in Assemblies 19, 20 and 21; similar to mucins and to a Litomosoides microfilarial sheath protein	GO:0031505 fungal-type cell wall organization |	GO:0005199 structural constituent of cell wall |	GO:0046658 anchored to plasma membrane | GO:0009277 fungal-type cell wall |
orf19.3066	0.685124	0.242882	0.19411	0.537433	0.476363	0.855329	ENG1	Endo-1,3-beta-glucanase required for cell separation after division, orthologous to S. cerevisiae Dse4p; caspofungin repressed; fungal-specific (no human or murine homolog); repressed in response to alpha pheromone in SpiderM medium	GO:0007094 mitotic cell cycle spindle assembly checkpoint | GO:0007109 cytokinesis, completion of separation |	GO:0004338 glucan 1,3-beta-glucosidase activity | GO:0042973 glucan endo-1,3-beta-D-glucosidase activity |	GO:0005737 cytoplasm | GO:0005576 extracellular region | GO:0030428 cell septum | GO:0009277 fungal-type cell wall |
orf19.2758	0.652318	0.176359	0.0999317	0.366502	0.34623	0.82384	PGA38	Putative GPI-anchored protein of unknown function; repressed during cell wall regeneration			GO:0009986 cell surface |
orf19.4910	1.03683	0.334584	0.144807	0.645229	0.206562	0.596999	FGR41	Putative GPI-anchored protein; transposon mutation affects filamentous growth; possibly spurious ORF (Annotation Working Group prediction)	GO:0030447 filamentous growth | GO:0007109 cytokinesis, completion of separation | GO:0007124 pseudohyphal growth |		GO:0009986 cell surface | GO:0009277 fungal-type cell wall | GO:0005576 extracellular region |
orf19.3893	0.993718	0.309418	0.127482	0.496913	0.223251	0.675626	SCW11	Cell wall protein; transcription is decreased in mutant lacking ACE2; downregulated in core caspofungin response; transcriptionally regulated by iron; expression greater in high iron	GO:0007109 cytokinesis, completion of separation |	GO:0004338 glucan 1,3-beta-glucosidase activity |	GO:0009277 fungal-type cell wall | GO:0005576 extracellular region |
orf19.4000	1.0614	0.666184	0.478335	0.490212	0.816962	0.660109		Putative homeodomain transcription factor; predicted ORF in Assemblies 19, 20 and 21	GO:0016036 cellular response to phosphate starvation | GO:0000105 histidine biosynthetic process | GO:0009113 purine base biosynthetic process | GO:0006350 transcription |	GO:0003700 transcription factor activity | GO:0043565 sequence-specific DNA binding | GO:0016563 transcription activator activity |	GO:0005634 nucleus |
orf19.1207	0.488121	1.37988	0.646867	1.34211	0.474757	0.524328		Predicted ORF in Assemblies 19, 20 and 21
orf19.6645	0.684307	0.453278	0.398438	1.54761	0.637499	0.530582	HMO1	High mobility group-like protein; activates pseudohyphal growth when expressed in S. cerevisiae; decreased expression in hyphae compared to yeast-form cells; amphotericin B repressed	GO:0006356 regulation of transcription from RNA polymerase I promoter | GO:0006366 transcription from RNA polymerase II promoter | GO:0006357 regulation of transcription from RNA polymerase II promoter | GO:0006276 plasmid maintenance |	GO:0003697 single-stranded DNA binding | GO:0000182 rDNA binding | GO:0008301 DNA bending activity | GO:0003701 RNA polymerase I transcription factor activity |	GO:0030874 nucleolar chromatin | GO:0005737 cytoplasm |
orf19.3740	0.593109	0.384137	0.473867	1.52561	0.889742	0.821449	PGA23	Putative GPI-anchored protein of unknown function; transcription is negatively regulated by Rim101p; regulated by Cyr1p; shows colony morphology-related gene regulation by Ssn6p	GO:0042493 response to drug |		GO:0009986 cell surface |
orf19.993	0.485443	0.423013	0.466234	1.31217	1.13636	0.640137		Predicted ORF in Assemblies 19, 20 and 21
orf19.647.3	0.394021	0.386685	0.529466	1.32407	1.0001	0.620076		ORF Predicted by Annotation Working Group
orf19.1563	0.454646	0.474845	0.497025	1.65443	0.812401	0.641641	ECM3	Predicted ORF in Assemblies 19, 20 and 21	GO:0007047 cell wall organization |		GO:0005783 endoplasmic reticulum |
orf19.5196	0.421209	0.455657	0.423101	1.45306	0.856072	0.518624	ESS1	Prolyl isomerase (parvulin class); essential; involved in yeast-hyphal switching, Cph1p pathway; has inflexible linker between WW and isomerase domains, unlike human homolog; functional homolog of S. cerevisiae Ess1p	GO:0030448 hyphal growth | GO:0009405 pathogenesis | GO:0000122 negative regulation of transcription from RNA polymerase II promoter | GO:0042326 negative regulation of phosphorylation | GO:0006369 termination of RNA polymerase II transcription | GO:0006397 mRNA processing |	GO:0003755 peptidyl-prolyl cis-trans isomerase activity | GO:0003711 transcription elongation regulator activity |	GO:0005634 nucleus |
orf19.5842	0.485331	0.615876	0.452001	1.52048	0.699554	0.420242		Predicted ORF in Assemblies 19, 20 and 21	GO:0006780 uroporphyrinogen III biosynthetic process | GO:0000103 sulfate assimilation | GO:0006555 methionine metabolic process |	GO:0004851 uroporphyrin-III C-methyltransferase activity |
orf19.2551	0.345658	0.3939	0.392472	1.43379	0.845418	0.265657	MET6	Essential 5-methyltetrahydropteroyltriglutamate-homocysteine methyltransferase (cobalamin-independent methionine synthase); antigenic during murine or human systemic infection; heat shock, estrogen, possibly biofilm, and GCN-induced	GO:0044416 induction by symbiont of host defense response | GO:0009408 response to heat | GO:0006950 response to stress | GO:0006555 methionine metabolic process | GO:0009086 methionine biosynthetic process |	GO:0003871 5-methyltetrahydropteroyltriglutamate-homocysteine S-methyltransferase activity |	GO:0030446 hyphal cell wall | GO:0005625 soluble fraction | GO:0005829 cytosol | GO:0009277 fungal-type cell wall | GO:0001950 plasma membrane enriched fraction | GO:0005737 cytoplasm |
orf19.111	0.15302	0.34607	0.296415	1.992	0.456614	0.304569	CAN2	Putative amino acid permease; transcription is regulated by Nrg1p and Tup1p; caspofungin induced; flucytosine induced; shows colony morphology-related gene regulation by Ssn6p; ; fungal-specific (no human or murine homolog)	GO:0015802 basic amino acid transport | GO:0055085 transmembrane transport |	GO:0015181 arginine transmembrane transporter activity |	GO:0045121 membrane raft | GO:0005739 mitochondrion | GO:0005886 plasma membrane |
orf19.6637	0.255103	0.511006	0.591669	2.00136	0.971731	0.414976		Predicted ORF in Assemblies 19, 20 and 21
orf19.7265	0.501048	0.663204	0.368854	0.88174	0.725816	0.444151		Predicted ORF in Assemblies 19, 20 and 21	GO:0000398 nuclear mRNA splicing, via spliceosome |
orf19.35	0.458608	0.592958	0.804685	1.08002	0.490945	0.53614		Predicted ORF in Assemblies 19, 20 and 21
orf19.5312	0.50408	0.462763	0.557916	2.25634	0.226318	0.23967		Predicted ORF in Assemblies 19, 20 and 21	GO:0000096 sulfur amino acid metabolic process | GO:0045944 positive regulation of transcription from RNA polymerase II promoter | GO:0046686 response to cadmium ion | GO:0046685 response to arsenic |	GO:0003713 transcription coactivator activity |	GO:0005634 nucleus |
orf19.105	0.69466	0.766039	0.749121	1.25571	0.404735	0.332619	HAL22	Putative phosphoadenosine-5'-phosphate (PAP) or 3'-phosphoadenosine 5'-phosphosulfate (PAPS) phosphatase; possible role in sulfur recycling; induced upon biofilm formation	GO:0000103 sulfate assimilation | GO:0009086 methionine biosynthetic process | GO:0042493 response to drug |	GO:0008441 3'(2'),5'-bisphosphate nucleotidase activity |	GO:0005737 cytoplasm |
orf19.5305	0.646662	0.629947	0.818243	1.32634	0.420927	0.377364	RHD3	Putative GPI-anchored protein that localizes to the cell wall; transcription is decreased upon yeast-hyphal switch; transcriptionally regulated by iron; expression greater in high iron; clade-associated gene expression			GO:0009986 cell surface | GO:0016020 membrane | GO:0030445 yeast-form cell wall | GO:0009277 fungal-type cell wall | GO:0030446 hyphal cell wall | GO:0046658 anchored to plasma membrane |
orf19.2738	0.328277	0.297972	0.372823	1.97792	0.245524	0.137572	SUL2	Protein described as a sulfate transporter; transcription is negatively regulated by Sfu1p; induced upon biofilm formation; amphotericin B induced	GO:0008272 sulfate transport | GO:0055085 transmembrane transport |	GO:0015116 sulfate transmembrane transporter activity |	GO:0005886 plasma membrane |
orf19.6755	0.440822	0.486897	0.481048	0.983587	0.405181	0.338672		Predicted ORF in Assemblies 19, 20 and 21	GO:0009060 aerobic respiration | GO:0005975 carbohydrate metabolic process |	GO:0004458 D-lactate dehydrogenase (cytochrome) activity |	GO:0005739 mitochondrion | GO:0005743 mitochondrial inner membrane |
orf19.2529	0.445186	0.514496	0.43819	1.18766	0.436243	0.353671		Predicted ORF in Assemblies 19, 20 and 21; shares similarity with human Pig-H, which is involved in glycosylphosphatidylinositol assembly
orf19.3301	0.838603	0.630131	0.616263	1.29663	0.435772	0.493709		Predicted ORF in Assemblies 19, 20 and 21; induced by heavy metal (cadmium) stress; Hog1p-induced; transcriptionally activated by Mnl1p under weak acid stress	GO:0016567 protein ubiquitination | GO:0000114 regulation of transcription involved in G1 phase of mitotic cell cycle | GO:0000087 M phase of mitotic cell cycle | GO:0046686 response to cadmium ion | GO:0031146 SCF-dependent proteasomal ubiquitin-dependent protein catabolic process | GO:0030174 regulation of DNA replication initiation | GO:0046685 response to arsenic | GO:0000082 G1/S transition …	GO:0004842 ubiquitin-protein ligase activity | GO:0005515 protein binding |	GO:0043224 nuclear SCF ubiquitin ligase complex |
orf19.946	0.52309	0.29865	0.303338	1.73435	0.220113	0.0967866	MET14	Predicted ORF in Assemblies 19, 20 and 21; predicted role in sulfur metabolism; induced upon biofilm formation; possibly adherence-induced	GO:0000103 sulfate assimilation | GO:0006555 methionine metabolic process | GO:0042493 response to drug |	GO:0004020 adenylylsulfate kinase activity |	GO:0005622 intracellular |
orf19.5025	0.574962	0.282909	0.244801	1.60173	0.197199	0.0834199	MET3	Putative ATP sulfurlyase of sulfate assimilation; repressed by Met or Cys, Sfu1p, or in fluconazole-resistant isolate; strongly induced on biofilm formation, even in presence of Met and Cys; Hog1p-, caspofungin-, possibly adherence-induced	GO:0000103 sulfate assimilation | GO:0006555 methionine metabolic process |	GO:0004781 sulfate adenylyltransferase (ATP) activity |	GO:0005739 mitochondrion |
orf19.2369.1	0.496695	0.437717	0.272551	1.17592	0.282777	0.124506	ATX1	ORF Predicted by Annotation Working Group; flucytosine induced; decreased expression observed in an ssr1 homozygous null mutant	GO:0006825 copper ion transport | GO:0006879 cellular iron ion homeostasis | GO:0006979 response to oxidative stress |	GO:0016531 copper chaperone activity |	GO:0005829 cytosol |
orf19.1113	0.495173	0.506084	0.53213	2.03022	0.589892	0.324308		Predicted ORF in Assemblies 19, 20 and 21; possibly spurious ORF (Annotation Working Group prediction)
orf19.1855	0.47565	0.604269	0.463767	4.21094	0.40673	0.199579		Predicted membrane transporter, member of the anion:cation symporter (ACS) family, major facilitator superfamily (MFS); Gcn4p-regulated; flucytosine induced; ketoconazole-repressed; oxidative stress-induced via Cap1p	GO:0006820 anion transport |	GO:0015296 anion |	GO:0016020 membrane |
orf19.4486	0.910663	0.776574	1.21249	0.498337	0.4162	0.735138		Predicted ORF from Assembly 19; removed from Assembly 20
orf19.5065	0.829548	0.817749	1.00656	0.496969	0.313024	0.619746		Predicted ORF in Assemblies 19, 20 and 21	GO:0006621 protein retention in ER lumen | GO:0006486 protein amino acid glycosylation |		GO:0016020 membrane |
orf19.4478	0.765867	0.915963	1.14155	0.521162	0.394191	0.436372		Predicted ORF in Assemblies 19, 20 and 21	GO:0070146 mitochondrial aspartyl-tRNA aminoacylation |	GO:0004815 aspartate-tRNA ligase activity |	GO:0005739 mitochondrion |
orf19.5193	0.599581	0.778478	0.965739	0.428104	0.232616	0.392607		Protein similar to oxidoreductases; transcription is upregulated in response to treatment with ciclopirox olamine; upregulation correlates with clinical development of fluconazole resistance; merged with orf19.6837 in Assembly 20
orf19.5282	0.306516	0.631607	1.61244	0.18547	0.0661101	0.187156		Predicted ORF in Assemblies 19, 20 and 21; decreased expression in hyphae compared to yeast-form cells; regulated by Efg1p and Efh1p; intron in 5'-UTR; transcriptionally activated by Mnl1p under weak acid stress
orf19.2988	0.902232	1.12064	1.0241	0.528434	0.296607	0.470403		Predicted ORF in Assemblies 19, 20 and 21	GO:0016226 iron-sulfur cluster assembly | GO:0006879 cellular iron ion homeostasis |		GO:0005739 mitochondrion |
orf19.6529	0.631096	0.636276	0.850872	0.643324	0.157368	0.487855	CDC34	Transcription is regulated by Nrg1p and Tup1p, and by Gcn2p and Gcn4p	GO:0000082 G1/S transition of mitotic cell cycle | GO:0042787 protein ubiquitination during ubiquitin-dependent protein catabolic process | GO:0000209 protein polyubiquitination | GO:0051865 protein autoubiquitination | GO:0000086 G2/M transition of mitotic cell cycle | GO:0031146 SCF-dependent proteasomal ubiquitin-dependent protein catabolic process |	GO:0042803 protein homodimerization activity | GO:0004842 ubiquitin-protein ligase activity |	GO:0000152 nuclear ubiquitin ligase complex | GO:0005634 nucleus | GO:0019005 SCF ubiquitin ligase complex | GO:0005737 cytoplasm |
orf19.1551	1.82586	1.44076	1.36613	0.187175	0.139877	0.147811		Predicted ORF in Assemblies 19, 20 and 21
orf19.4820	1.22157	1.2778	1.03075	0.361534	0.394519	0.419167		Predicted ORF in Assemblies 19, 20 and 21
orf19.7046	1.36417	1.28283	1.13894	0.340139	0.37622	0.363751	MET28	Protein induced during the mating process	GO:0006357 regulation of transcription from RNA polymerase II promoter | GO:0000097 sulfur amino acid biosynthetic process |	GO:0003704 specific RNA polymerase II transcription factor activity |	GO:0005634 nucleus |
orf19.5846	1.27462	1.04507	1.01425	0.459677	0.344441	0.466445		Predicted ORF in Assemblies 19, 20 and 21	GO:0006367 transcription initiation from RNA polymerase II promoter | GO:0000717 nucleotide-excision repair, DNA duplex unwinding | GO:0007070 negative regulation of transcription from RNA polymerase II promoter, mitotic |	GO:0016251 general RNA polymerase II transcription factor activity |	GO:0000443 SSL2-core TFIIH complex portion of holo TFIIH complex | GO:0000442 SSL2-core TFIIH complex portion of NEF3 complex | GO:0000439 core TFIIH complex |
orf19.2176	0.809557	1.13495	1.30568	0.382638	0.396566	0.495617	IFM3	Predicted ORF in Assemblies 19, 20 and 21; Plc1p-regulated
orf19.820	0.828227	1.10207	1.11894	0.401164	0.378033	0.461925	SDS22	Predicted ORF in Assemblies 19, 20 and 21; macrophage/pseudohyphal-repressed	GO:0007059 chromosome segregation | GO:0051457 maintenance of protein location in nucleus |	GO:0030234 enzyme regulator activity |	GO:0005634 nucleus | GO:0005737 cytoplasm |
orf19.5620	0.826258	1.33347	1.08865	0.416564	0.398867	0.484254		Predicted ORF in Assemblies 19, 20 and 21; regulated by Gcn4p; induced in response to amino acid starvation (3-aminotriazole treatment); increased transcription is observed upon benomyl treatment or in an azole-resistant strain that overexpresses MDR1	GO:0030968 endoplasmic reticulum unfolded protein response |
orf19.6275	0.956293	1.27446	1.25986	0.384447	0.357399	0.374195		Predicted ORF in Assemblies 19, 20 and 21			GO:0005737 cytoplasm |
orf19.4779	0.963634	1.40346	1.32115	0.135064	0.127908	0.189347		Putative transporter; slightly similar to the Sit1p siderophore transporter; Gcn4p-regulated; fungal-specific (no human or murine homolog); transcriptionally activated by Mnl1p under weak acid stress	GO:0015893 drug transport |	GO:0015239 multidrug transporter activity | GO:0015238 drug transporter activity |	GO:0016020 membrane |
orf19.5665	0.989451	1.15519	1.1527	0.361679	0.479728	0.495685		Predicted ORF in Assemblies 19, 20 and 21	GO:0070485 dehydro-D-arabinono-1,4-lactone biosynthetic process |	GO:0045290 D-arabinose 1-dehydrogenase [NAD(P)+] activity |
orf19.6465	0.964234	0.932905	0.909095	0.486702	0.483371	0.367995		Predicted ORF in Assemblies 19, 20 and 21	GO:0007124 pseudohyphal growth | GO:0001403 invasive growth in response to glucose limitation |		GO:0005886 plasma membrane |
orf19.5016	1.01574	1.05555	0.93908	0.451411	0.403697	0.280728		Protein not essential for viability
orf19.861	0.9231	0.870523	0.803674	0.292744	0.171842	0.15737		Predicted transcriptional regulator with bZip domain	GO:0006350 transcription | GO:0006355 regulation of transcription, DNA-dependent |	GO:0003700 transcription factor activity |	GO:0005634 nucleus |
orf19.2073	0.897651	0.888305	1.03013	0.470389	0.373274	0.320649		Predicted ORF in Assemblies 19, 20 and 21; transcriptionally activated by Mnl1p under weak acid stress
orf19.1126	1.0177	1.00431	1.40107	0.270561	0.151681	0.124481		Predicted ORF from Assembly 19; possibly spurious ORF (Annotation Working Group prediction); removed from Assembly 20
orf19.1496	1.01878	1.21956	1.03087	0.310417	0.114859	0.13297		Putative transcription factor with zinc finger DNA-binding motif; possibly spurious ORF (Annotation Working Group prediction)	GO:0006355 regulation of transcription, DNA-dependent |	GO:0003700 transcription factor activity |
orf19.79	0.894624	1.06734	1.03627	0.505169	0.253126	0.231857		Predicted ORF from Assembly 19; removed from Assembly 20
orf19.7208	0.889558	1.14626	0.881222	0.248893	0.12385	0.166857	CSK1	Putative mitogen-activated protein (MAP) kinase with an unknown role; null mutant produces wrinkled colonies; similar to S. cerevisiae Smk1p, which is a protein kinase required for sporulation	GO:0006468 protein amino acid phosphorylation | GO:0042174 negative regulation of sporulation resulting in formation of a cellular spore | GO:0030476 ascospore wall assembly |	GO:0004707 MAP kinase activity |	GO:0005739 mitochondrion |
orf19.2074	1.22131	1.10677	0.949233	0.141294	0.0701759	0.0711137		Predicted ORF in Assemblies 19, 20 and 21
orf19.1497	1.05675	1.33526	0.916266	0.376441	0.265989	0.225278		Putative transcription factor with zinc cluster DNA-binding motif	GO:0006355 regulation of transcription, DNA-dependent |	GO:0003700 transcription factor activity |
orf19.181	1.04748	1.34163	0.755768	0.250559	0.227831	0.149075		Predicted ORF from Assembly 19; merged with orf19.4128 in Assembly 20
orf19.909	1.41181	1.32091	0.728501	0.187494	0.142511	0.0966538	STP4	Putative transcription factor with zinc finger DNA-binding motif; induced in core caspofungin response; shows colony morphology-related gene regulation by Ssn6p; induced by 17-beta-estradiol, ethynyl estradiol	GO:0006388 tRNA splicing, via endonucleolytic cleavage and ligation | GO:0006355 regulation of transcription, DNA-dependent |	GO:0003700 transcription factor activity | GO:0043565 sequence-specific DNA binding |	GO:0005739 mitochondrion | GO:0005634 nucleus |
orf19.3010	1.2931	1.20088	0.923237	0.474842	0.362996	0.337704		Predicted ORF in Assemblies 19, 20 and 21	GO:0009249 protein lipoylation |	GO:0016874 ligase activity |	GO:0005739 mitochondrion |
orf19.2313	1.13863	1.04594	1.08038	0.517806	0.477751	0.408639		Predicted ORF in Assemblies 19, 20 and 21
orf19.4128	1.23493	1.03444	0.949981	0.336907	0.298808	0.211618		Predicted ORF in Assemblies 19, 20 and 21			GO:0005811 lipid particle |
orf19.473	1.35711	1.35658	0.984796	0.393338	0.344609	0.227084	TPO4	Putative sperimidine transporter; fungal-specific (no human or murine homolog)	GO:0015848 spermidine transport | GO:0000296 spermine transport | GO:0015893 drug transport |	GO:0015606 spermidine transmembrane transporter activity | GO:0000297 spermine transmembrane transporter activity | GO:0015238 drug transporter activity |	GO:0005774 vacuolar membrane | GO:0005886 plasma membrane | GO:0016020 membrane |
orf19.2862	1.52548	1.44736	1.10264	0.28324	0.262852	0.150341	RIB1	Putative GTP cyclohydrolase II; enzyme of riboflavin biosynthesis; fungal-specific (no human or murine homolog)	GO:0009231 riboflavin biosynthetic process | GO:0042493 response to drug |	GO:0019238 cyclohydrolase activity |	GO:0005634 nucleus | GO:0005737 cytoplasm |
orf19.5133	0.951995	1.34545	1.138	0.376211	0.314717	0.253255		Predicted zinc-finger protein of unknown function	GO:0006357 regulation of transcription from RNA polymerase II promoter |	GO:0003704 specific RNA polymerase II transcription factor activity |	GO:0005634 nucleus |
orf19.5132	0.939951	1.26928	0.790023	0.530375	0.435617	0.356857		Predicted ORF in Assemblies 19, 20 and 21
orf19.4897	1.04455	0.819039	0.767355	0.311939	0.414251	0.426521		Predicted ORF in Assemblies 19, 20 and 21	GO:0015914 phospholipid transport |	GO:0008526 phosphatidylinositol transporter activity |	GO:0005829 cytosol | GO:0032541 cortical endoplasmic reticulum | GO:0005792 microsome |
orf19.1828	0.872631	0.917902	0.728474	0.317797	0.367171	0.429029	BUD16	Protein similar to S. cerevisiae Bud16p; induced in response to alpha pheromone in SpiderM medium	GO:0000282 cellular bud site selection | GO:0042823 pyridoxal phosphate biosynthetic process |		GO:0005737 cytoplasm |
orf19.2350	1.18681	0.784325	0.932679	0.339302	0.337234	0.340969		Protein similar to S. cerevisiae Yor0378wp; transposon mutation affects filamentous growth; not essential for viability; member of MFS family of transporters; fungal-specific (no human or murine homolog)	GO:0030447 filamentous growth | GO:0015893 drug transport |	GO:0015238 drug transporter activity |	GO:0016020 membrane |
orf19.3905	1.41098	0.848762	0.66552	0.136353	0.0754857	0.0798219		Predicted ORF in Assemblies 19, 20 and 21
orf19.2226	1.17799	1.05209	0.745223	0.308872	0.258515	0.230959		Predicted ORF from Assembly 19; removed from Assembly 20; merged with orf19.932 in Assembly 21
orf19.3911	1.01795	1.03507	0.801896	0.397247	0.410211	0.4199	SAH1	Protein described as S-adenosyl-L-homocysteine hydrolase; predicted enzyme of sulfur amino acid metabolism; antigenic in human; biofilm-, alkaline-, fluconazole-induced expression; Gcn4p-regulated; amino acid starvation (3-AT) repressed	GO:0016259 selenocysteine metabolic process | GO:0006555 methionine metabolic process |	GO:0004013 adenosylhomocysteinase activity |	GO:0005737 cytoplasm |
orf19.1163	0.857071	0.916924	0.875638	0.412398	0.297129	0.40717		Predicted ORF in Assemblies 19, 20 and 21
orf19.6269	0.931571	0.967511	0.890216	0.29158	0.199276	0.262728		Predicted ORF in Assemblies 19, 20 and 21
orf19.2282	0.937383	0.772957	0.706336	0.198226	0.140777	0.183455		Predicted ORF in Assemblies 19, 20 and 21
orf19.7374	0.85778	0.859599	0.804344	0.354255	0.317154	0.404912	CTA4	Predicted transcription factor involved in response to nitric oxide; downregulated upon adherence to polystyrene; induced by nitric oxide; transcriptionally activated by Mnl1p under weak acid stress	GO:0006356 regulation of transcription from RNA polymerase I promoter | GO:0052565 response to defense-related host nitric oxide production | GO:0045944 positive regulation of transcription from RNA polymerase II promoter |	GO:0016563 transcription activator activity | GO:0003704 specific RNA polymerase II transcription factor activity |	GO:0005634 nucleus |
orf19.7539	1.02116	0.929667	0.964534	0.380211	0.350479	0.372917	INO2	Transcriptional activator that may be involved in regulation of ribosomal protein genes; forms a heterodimer with Ino4p; related to S. cerevisiae Ino2p	GO:0045944 positive regulation of transcription from RNA polymerase II promoter |	GO:0016563 transcription activator activity | GO:0003677 DNA binding |
orf19.487	0.809656	0.885424	1.04443	0.0135618	0.0109768	0.0138642	SPT14	Putative DNA-binding transcription factor; predicted role in regulation of biogenesis of the cell wall; upregulated in biofilm	GO:0006506 GPI anchor biosynthetic process | GO:0006355 regulation of transcription, DNA-dependent |	GO:0016758 transferase activity, transferring hexosyl groups | GO:0003700 transcription factor activity | GO:0008194 UDP-glycosyltransferase activity |	GO:0005783 endoplasmic reticulum |
orf19.6650	0.757171	0.691541	1.01765	0.510582	0.42451	0.448069		Predicted ORF in Assemblies 19, 20 and 21; possibly spurious ORF (Annotation Working Group prediction)
orf19.3234.1	0.643988	0.661638	0.919296	0.481994	0.377662	0.423442	SFT1	ORF Predicted by Annotation Working Group; Plc1p-regulated	GO:0006891 intra-Golgi vesicle-mediated transport |	GO:0005484 SNAP receptor activity |	GO:0000139 Golgi membrane |
orf19.7419	0.75432	0.694843	0.864472	0.613172	0.45223	0.482993	HNT2	Predicted ORF in Assemblies 19, 20 and 21; induced upon low-level peroxide stress	GO:0009164 nucleoside catabolic process |	GO:0017111 nucleoside-triphosphatase activity |	GO:0005739 mitochondrion | GO:0005634 nucleus |
orf19.5313	0.744147	0.686627	0.802479	0.595878	0.469001	0.452523		Predicted ORF from Assembly 19; merged with orf19.1430 in Assembly 20
orf19.4817	0.599336	0.67421	0.755871	0.508947	0.452683	0.39545	RAM2	Alpha subunit of heterodimeric protein geranylgeranyltransferase type I and farnesyltransferase; a-specific transcription; lovastatin and fluconazole regulated; GGTase I enzyme binds zinc, is Mg-dependent; Cdc42p is GGTase I substrate	GO:0018344 protein geranylgeranylation | GO:0018347 protein amino acid farnesylation | GO:0007323 peptide pheromone maturation | GO:0018348 protein amino acid geranylgeranylation |	GO:0004662 CAAX-protein geranylgeranyltransferase activity | GO:0004660 protein farnesyltransferase activity |	GO:0005965 protein farnesyltransferase complex | GO:0005953 CAAX-protein geranylgeranyltransferase complex |
orf19.461	0.622624	0.678789	0.794164	0.77167	0.470712	0.399277		Protein similar to S. cerevisiae Mhp1p, which is involved in microtubule stabilization; transposon mutation affects filamentous growth; merged with orf19.6621 in Assembly 20
orf19.4756	0.698921	0.710257	0.78654	0.731536	0.41683	0.390764		Predicted ORF in Assemblies 19, 20 and 21; fungal-specific			GO:0016020 membrane |
orf19.3482	0.665963	0.743716	0.707802	0.671824	0.375221	0.319627		Predicted ORF in Assemblies 19, 20 and 21	GO:0006734 NADH metabolic process |	GO:0000210 NAD+ diphosphatase activity |	GO:0005777 peroxisome |
orf19.4370	0.915704	0.823799	0.687353	0.492969	0.199723	0.317804		Predicted ORF in Assemblies 19, 20 and 21; induced by nitric oxide; oxidative stress-induced via Cap1p; fungal-specific (no human or murine homolog)
orf19.5949	1.04358	0.693057	0.653012	0.749623	0.31762	0.412446	FAS2	Alpha subunit of fatty-acid synthase; required for virulence in mouse systemic infection and rat oropharyngeal infection models; regulated by Efg1p; fluconazole-induced; amphotericin B repressed	GO:0006633 fatty acid biosynthetic process | GO:0009405 pathogenesis |	GO:0004312 fatty-acid synthase activity | GO:0004315 3-oxoacyl-[acyl-carrier-protein] synthase activity | GO:0004316 3-oxoacyl-[acyl-carrier-protein] reductase activity | GO:0008897 holo-[acyl-carrier-protein] synthase activity |	GO:0005829 cytosol | GO:0005739 mitochondrion | GO:0005835 fatty acid synthase complex |
orf19.4555	0.76152	0.382816	0.675396	0.483328	0.154813	0.289161	ALS4	ALS family protein; role in adhesion and wild-type germ tube induction; growth and temperature regulated; expressed during infection of human buccal epithelial cells; down-regulated upon vaginal contact; putative GPI-anchored	GO:0016337 cell-cell adhesion | GO:0030448 hyphal growth | GO:0044406 adhesion to host | GO:0006508 proteolysis | GO:0006807 nitrogen compound metabolic process | GO:0000752 agglutination involved in conjugation with cellular fusion | GO:0007124 pseudohyphal growth | GO:0001403 invasive growth in response to glucose limitation |	GO:0050839 cell adhesion molecule binding |	GO:0009277 fungal-type cell wall | GO:0009986 cell surface | GO:0030445 yeast-form cell wall | GO:0000324 fungal-type vacuole | GO:0005886 plasma membrane |
orf19.1097	0.71283	0.408736	0.626799	0.52943	0.16926	0.173933	ALS2	ALS family protein; role in adhesion, biofilm formation, germ tube induction; expressed at infection of human buccal epithelial cells; putative GPI-anchor; induced by ketoconazole, low iron and at cell wall regeneration; regulated by Sfu1p	GO:0016337 cell-cell adhesion | GO:0044011 single-species biofilm formation on inanimate substrate | GO:0009405 pathogenesis | GO:0030448 hyphal growth | GO:0044406 adhesion to host | GO:0000128 flocculation |	GO:0030246 carbohydrate binding |	GO:0009277 fungal-type cell wall | GO:0009986 cell surface |
orf19.7043	1.43516	0.974551	0.538039	0.373596	0.22011	0.15944		Predicted ORF in Assemblies 19, 20 and 21			GO:0005783 endoplasmic reticulum |
orf19.2463	0.664072	0.881844	0.709717	0.409725	0.217513	0.113832	PRN2	Predicted ORF in Assemblies 19, 20 and 21; similar to pirin
orf19.4599	0.852811	0.86996	0.774835	0.615324	0.459998	0.340386	PHO89	Putative phosphate permease; expression is regulated upon white-opaque switching; alkaline upregulated by Rim101p; induced upon biofilm formation; possibly adherence-induced	GO:0006817 phosphate transport | GO:0006796 phosphate metabolic process | GO:0055085 transmembrane transport |	GO:0048249 high affinity phosphate transmembrane transporter activity | GO:0015319 sodium |	GO:0005886 plasma membrane |
orf19.2106	0.792126	0.74092	0.792673	0.527925	0.425765	0.349846		Predicted ORF in Assemblies 19, 20 and 21
orf19.692	0.952605	0.902364	0.784828	0.67821	0.301713	0.220258		Predicted ORF in Assemblies 19, 20 and 21
orf19.1162	0.669539	0.74155	0.644814	0.260059	0.0563986	0.0662937		Predicted ORF in Assemblies 19, 20 and 21; increased transcription is observed upon benomyl treatment
orf19.2462	0.715165	0.74182	0.732033	0.2932	0.0527475	0.0459819	PRN3	Predicted ORF in Assemblies 19, 20 and 21; similar to pirin; transcriptionally activated by Mnl1p under weak acid stress
orf19.5845	0.872251	0.815924	0.570577	0.883576	0.464038	0.397136	RNR3	Protein described as large subunit of ribonucleotide reductase; transcriptionally regulated by iron; expression greater in low iron	GO:0006260 DNA replication |	GO:0004748 ribonucleoside-diphosphate reductase activity |	GO:0005829 cytosol |
orf19.3106	0.813529	0.734485	0.631787	0.955938	0.436979	0.426313	MET16	Putative 3'-phosphoadenylsulfate reductase; predicted enzyme of sulfur amino acid metabolism; reports differ on regulation during biofilm formation; fungal-specific (no human or murine homolog)	GO:0000103 sulfate assimilation | GO:0042493 response to drug | GO:0006555 methionine metabolic process |	GO:0004604 phosphoadenylyl-sulfate reductase (thioredoxin) activity |
orf19.570	0.865809	0.810238	0.848935	0.889467	0.397569	0.381288	IFF8	Putative GPI-anchored protein of unknown function; decreased transcription is observed in an azole-resistant strain that overexpresses MDR1			GO:0009986 cell surface |
orf19.1460	0.818368	0.747124	0.697826	0.862323	0.310826	0.366826		Putative glutamine-dependent NAD synthetase, involved in NAD salvage pathway	GO:0019358 nicotinate nucleotide salvage | GO:0009435 NAD biosynthetic process |	GO:0003952 NAD+ synthase (glutamine-hydrolyzing) activity | GO:0016811 hydrolase activity, acting on carbon-nitrogen (but not peptide) bonds, in linear amides |	GO:0005634 nucleus | GO:0005737 cytoplasm |
orf19.6244	0.804197	0.877888	0.832181	0.809133	0.346641	0.415792		Predicted ORF in Assemblies 19, 20 and 21
orf19.3661	0.79878	0.891341	0.805594	1.04349	0.437112	0.35899		Predicted ORF in Assemblies 19, 20 and 21; transcriptionally activated by Mnl1p under weak acid stress	GO:0016579 protein deubiquitination |	GO:0004843 ubiquitin-specific protease activity |	GO:0005741 mitochondrial outer membrane |
orf19.321	0.509351	0.603729	0.538681	0.919871	0.10473	0.089206		Predicted ORF in Assemblies 19, 20 and 21	GO:0006865 amino acid transport |	GO:0015191 L-methionine transmembrane transporter activity |	GO:0016020 membrane |
orf19.3922	0.559436	0.846036	1.06307	0.857967	0.429945	0.462668		Predicted ORF in Assemblies 19, 20 and 21; protein detected by mass spec in exponential and stationary phase cultures	GO:0006206 pyrimidine base metabolic process |	GO:0008252 nucleotidase activity |
orf19.1130	0.655504	0.927815	1.15999	0.85836	0.396037	0.372353		Predicted ORF from Assembly 19; removed from Assembly 20
orf19.3364	0.499948	0.878373	1.37088	0.724339	0.518635	0.359927		Predicted ORF in Assemblies 19, 20 and 21; possibly spurious ORF (Annotation Working Group prediction)
orf19.6869	0.761389	0.993738	1.35877	0.623504	0.438799	0.384796		Predicted ORF in Assemblies 19, 20 and 21	GO:0006627 mitochondrial protein processing during import |	GO:0008233 peptidase activity |	GO:0005743 mitochondrial inner membrane | GO:0005811 lipid particle | GO:0005737 cytoplasm |
orf19.1321	0.74703	0.689422	1.66674	0.511826	0.382044	0.340079	HWP1	Hyphal cell wall protein; covalently crosslinked to epithelial cells by host transglutaminase; opaque- and a-specific, alpha-factor induced; at MTLa side of conjugation tube; assessment of virulence role complicated by URA3 effects	GO:0009405 pathogenesis | GO:0030448 hyphal growth | GO:0044406 adhesion to host | GO:0007124 pseudohyphal growth | GO:0001403 invasive growth in response to glucose limitation | GO:0030447 filamentous growth | GO:0044011 single-species biofilm formation on inanimate substrate | GO:0031505 fungal-type cell wall organization |		GO:0009986 cell surface | GO:0009277 fungal-type cell wall | GO:0005937 mating projection | GO:0030446 hyphal cell wall | GO:0005886 plasma membrane |
orf19.1327	0.484762	0.371899	1.55574	0.518964	0.248301	0.285598	RBT1	Putative cell wall protein with similarity to Hwp1p, required for virulence; predicted to be cell-wall attached and glycosylated; Tup1p repressed; serum, hyphal and alkaline induced; farnesol, alpha factor induced; Rfg1p-, Rim101p-regulated	GO:0009405 pathogenesis | GO:0031505 fungal-type cell wall organization |		GO:0009986 cell surface | GO:0009277 fungal-type cell wall | GO:0030446 hyphal cell wall |
orf19.5616	0.733518	0.732165	0.877922	0.482645	0.580959	0.190498		Predicted ORF in Assemblies 19, 20 and 21
orf19.6467	0.903976	0.746485	0.567429	0.45153	0.518546	0.319661		Predicted ORF from Assembly 19; merged with orf19.6469 in Assembly 20
orf19.780	0.58107	0.535295	0.497917	0.359274	0.599326	0.32741	DUR1,2	Urea amidolyase, contains urea carboxylase and allophanate hydrolase activities needed to hydrolyze urea to CO2; required for utilization of urea as nitrogen source and for hyphal switch in macrophages; transcription is regulated by Nrg1p
orf19.4404	0.963324	0.830821	0.692201	0.436265	0.287816	0.568429	PGA49	Putative GPI-anchored protein of unknown function			GO:0009986 cell surface |
orf19.3586	1.00104	0.918085	0.814303	0.497626	0.45853	0.658216		Predicted ORF in Assemblies 19, 20 and 21
orf19.37	1.10125	1.05151	0.795748	0.435482	0.452809	0.675133		Predicted ORF from Assembly 19; removed from Assembly 20
orf19.3268	1.08001	1.07231	0.826349	0.466017	0.359484	0.763082		Ortholog of S. cerevisiae Tma19p (Ykl065cp)	GO:0006412 translation | GO:0006979 response to oxidative stress |		GO:0005829 cytosol | GO:0005739 mitochondrion | GO:0005840 ribosome |
orf19.6403.1	1.00472	1.21897	0.776592	0.376842	0.318503	0.632244	RPP2A	Conserved acidic ribosomal protein, likely involved in regulation of translation elongation; interacts with Rpp1Bp; one of four similar ribosomal proteins (Rpp1Ap, Rpp1Bp, Rpp2Ap, Rpp2Bp); CUG start codon; upstream uORFs; Tbf1p-activated	GO:0006412 translation | GO:0006414 translational elongation |	GO:0003735 structural constituent of ribosome |	GO:0005840 ribosome |
orf19.4801	0.880862	0.883688	0.921692	0.35045	0.401067	0.649008		Predicted ORF in Assemblies 19, 20 and 21	GO:0006400 tRNA modification |	GO:0004811 tRNA isopentenyltransferase activity |	GO:0005829 cytosol | GO:0005739 mitochondrion | GO:0005730 nucleolus |
orf19.3325	0.913158	0.902571	0.898545	0.195573	0.349507	0.437467		Protein described as glycogen synthesis initiator; regulated by Efg1p and Efh1p; Hog1p-downregulated; shows colony morphology-related gene regulation by Ssn6p; increased expression in response to prostaglandins
orf19.922	0.964819	0.616425	0.85108	0.272735	0.383276	0.537011	ERG11	Lanosterol 14-alpha-demethylase, member of cytochrome P450 family that functions in ergosterol biosynthesis; target of azole antifungals; may contribute to drug resistance; azole- or biofilm-induced; subject to hypoxic regulation	GO:0042493 response to drug | GO:0006696 ergosterol biosynthetic process | GO:0001766 membrane raft polarization |	GO:0008398 sterol 14-demethylase activity | GO:0008144 drug binding |	GO:0016021 integral to membrane | GO:0005624 membrane fraction | GO:0005783 endoplasmic reticulum | GO:0005886 plasma membrane |
orf19.2704	0.884118	0.705451	0.650791	0.308146	0.309324	0.600443		Predicted ORF in Assemblies 19, 20 and 21
orf19.153	0.965071	0.884175	0.654044	0.358816	0.406832	0.796137		Predicted ORF from Assembly 19; merged with orf19.151 in Assembly 20
orf19.2310.1	0.957086	0.861222	0.66471	0.328095	0.32588	0.718834	RPL29	Ribosomal protein L29; transcription is induced upon germ tube formation; shows colony morphology-related gene regulation by Ssn6p; intron in 5'-UTR	GO:0006412 translation |	GO:0003735 structural constituent of ribosome |	GO:0022625 cytosolic large ribosomal subunit |
orf19.7596	0.902639	0.703124	0.614126	0.393696	0.4048	0.756453		Predicted ORF in Assemblies 19, 20 and 21
orf19.4375.1	0.957153	0.647181	0.595882	0.399929	0.400282	0.803863	RPS30	ORF Predicted by Annotation Working Group; putative 40S ribosomal protein S30; shows colony morphology-related gene regulation by Ssn6p	GO:0006412 translation |	GO:0003735 structural constituent of ribosome |	GO:0010494 stress granule |
orf19.162	0.858024	0.668713	0.678684	0.388142	0.402777	0.781928		Predicted ORF from Assembly 19; removed from Assembly 20
orf19.6734	0.866576	0.652157	0.67006	0.42932	0.387835	0.828276	TCC1	Protein involved in regulation of filamentous growth and virulence; interacts with Tup1p; acts in transcriptional regulation of hypha-specific genes; contains 4 tetratricopeptide repeat (TPR) motifs; flucytosine repressed; Tbp1p-activated	GO:0000122 negative regulation of transcription from RNA polymerase II promoter | GO:0016481 negative regulation of transcription | GO:0009405 pathogenesis | GO:0030447 filamentous growth |	GO:0003713 transcription coactivator activity | GO:0016565 general transcriptional repressor activity |	GO:0005634 nucleus |
orf19.7014	0.965967	0.718652	0.620423	0.47419	0.415961	0.72497		Putative protein of unknown function, transcription is positively regulated by Tbf1p; ORF Predicted by Annotation Working Group
orf19.4909.1	1.0952	0.794205	0.645607	0.411398	0.336099	0.946593	RPL42	ORF Predicted by Annotation Working Group; shows colony morphology-related gene regulation by Ssn6p	GO:0006412 translation |	GO:0003735 structural constituent of ribosome |
orf19.3035	0.955514	0.745003	0.904912	0.180949	0.271307	0.589555		Predicted ORF in Assemblies 19, 20 and 21	GO:0016584 nucleosome positioning | GO:0045944 positive regulation of transcription from RNA polymerase II promoter | GO:0006338 chromatin remodeling | GO:0006368 RNA elongation from RNA polymerase II promoter |	GO:0016944 RNA polymerase II transcription elongation factor activity | GO:0016887 ATPase activity |	GO:0005739 mitochondrion | GO:0008023 transcription elongation factor complex | GO:0046695 SLIK (SAGA-like) complex | GO:0000124 SAGA complex |
orf19.687.1	0.922934	0.822729	0.853168	0.240228	0.371729	0.765334	RPL25	ORF Predicted by Annotation Working Group; shows colony morphology-related gene regulation by Ssn6p	GO:0006412 translation | GO:0000027 ribosomal large subunit assembly |	GO:0003735 structural constituent of ribosome | GO:0003723 RNA binding |
orf19.1206	0.906947	0.621992	0.944995	0.181104	0.29935	0.776033	FET35	Protein with similarity to multicopper ferroxidase; transcriptionally activated in low iron conditions; transcription is repressed by Sfu1p and activated under weak acid stress by Mnl1p; merged with orf19.4215 in Assembly 20
orf19.527	0.901278	0.79222	0.728725	0.342271	0.433271	0.87352		Predicted ORF in Assemblies 19, 20 and 21; possibly spurious ORF (Annotation Working Group prediction)
orf19.2111.2	0.918347	0.655017	0.547196	0.174432	0.262156	0.840921	RPL38	Predicted ribosomal protein; genes encoding cytoplasmic ribosomal subunits, translation factors, and tRNA synthetases are downregulated upon phagocytosis by murine macrophage	GO:0006412 translation |	GO:0003735 structural constituent of ribosome |
orf19.2994	1.00985	0.842683	0.782123	0.442757	0.491649	0.937507	RPL13	Protein described as ribosomal subunit; antigenic during murine systemic infection; genes encoding cytoplasmic ribosomal subunits, translation factors, and tRNA synthetases are downregulated upon phagocytosis by murine macrophage	GO:0006412 translation |	GO:0003735 structural constituent of ribosome |
orf19.3325.3	0.809266	0.707496	0.625871	0.22308	0.380802	0.75973	RPS21B	Protein described as similar to ribosomal protein S21; regulated by Nrg1p, Tup1p; shows colony morphology-related gene regulation by Ssn6p; transcription is positively regulated by Tbf1p	GO:0006412 translation | GO:0000461 endonucleolytic cleavage to generate mature 3'-end of SSU-rRNA from (SSU-rRNA, 5.8S rRNA, LSU-rRNA) | GO:0000447 endonucleolytic cleavage in ITS1 to separate SSU-rRNA from 5.8S rRNA and LSU-rRNA from tricistronic rRNA transcript (SSU-rRNA, 5.8S rRNA, LSU-rRNA) |	GO:0003735 structural constituent of ribosome |	GO:0022627 cytosolic small ribosomal subunit |
orf19.6317	0.681198	0.521629	0.616044	0.131292	0.201579	0.784017	ADE6	Enzyme of adenine biosynthesis; not induced during GCN response, in contrast to the S. cerevisiae ortholog; protein detected by mass spec in stationary phase cultures	GO:0006164 purine nucleotide biosynthetic process |	GO:0004642 phosphoribosylformylglycinamidine synthase activity |	GO:0005737 cytoplasm |
orf19.4846	0.684563	0.706723	0.722792	0.488802	0.472212	0.87815		Protein not essential for viability			GO:0005737 cytoplasm |
orf19.6481	0.65509	0.690071	0.948	0.474118	0.495299	0.754173	YPS7	Putative aspartic-type endopeptidase with limited ability to degrade alpha pheromone; mutants show increased sensitivity to alpha pheromone	GO:0000749 response to pheromone during conjugation with cellular fusion |	GO:0004190 aspartic-type endopeptidase activity |	GO:0005783 endoplasmic reticulum |
orf19.3554	0.490283	0.63786	0.81107	0.26507	0.306859	0.660709	AAT1	Protein described as aspartate aminotransferase; soluble protein in hyphae; macrophage-induced protein; alkaline upregulated; amphotericin B repressed; gene used for strain identification by multilocus sequence typing, farnesol-induced	GO:0006536 glutamate metabolic process | GO:0006533 aspartate catabolic process |	GO:0004069 L-aspartate |	GO:0005625 soluble fraction | GO:0005737 cytoplasm |
orf19.3870	0.401256	0.550092	0.685804	0.178958	0.154327	0.505093	ADE13	Enzyme of adenine biosynthesis; soluble protein in hyphae; not induced during GCN response, in contrast to the S. cerevisiae ortholog; repressed by nitric oxide	GO:0006144 purine base metabolic process | GO:0006189 'de novo' IMP biosynthetic process |	GO:0004018 N6-(1,2-dicarboxyethyl)AMP AMP-lyase (fumarate-forming) activity |	GO:0005625 soluble fraction |
orf19.3391	0.682956	0.637705	0.879221	0.358251	0.354111	0.816991	ADK1	Protein described as adenylate kinase; decreased expression in hyphae compared to yeast-form cells; macrophage-induced protein; adenylate kinase release can be used as a marker for cell lysis	GO:0006172 ADP biosynthetic process |	GO:0004017 adenylate kinase activity |	GO:0005758 mitochondrial intermembrane space |
orf19.683	0.615743	0.623915	0.933229	0.234834	0.218962	0.692735		Predicted ORF from Assemblies 19 and 20; identical to orf19.3391; merged with orf19.3391 in Assembly 20 (see Locus History)
orf19.3967	0.699632	0.551667	1.08768	0.285246	0.280688	0.887392	PFK1	Alpha subunit of phosphofructokinase (PFK), which is Pfk1p, Pfk2p heteromultimer; PFK is activated by fructose 2,6-bisphosphate or AMP, inhibited by ATP; activity reduced on hyphal induction; phagocytosis-downregulated; fluconazole-induced	GO:0006096 glycolysis |	GO:0003872 6-phosphofructokinase activity |	GO:0005945 6-phosphofructokinase complex | GO:0005739 mitochondrion |
orf19.3759	1.34694	1.17353	0.841961	0.354937	0.343102	0.859038		Predicted ORF in Assemblies 19, 20 and 21	GO:0006357 regulation of transcription from RNA polymerase II promoter | GO:0002098 tRNA wobble uridine modification |	GO:0016944 RNA polymerase II transcription elongation factor activity |	GO:0008023 transcription elongation factor complex | GO:0005737 cytoplasm | GO:0033588 Elongator holoenzyme complex |
orf19.4632	1.08541	0.992444	0.805633	0.304766	0.279973	0.927241	RPL20B	Predicted ribosomal protein; genes encoding cytoplasmic ribosomal subunits, translation factors, and tRNA synthetases are downregulated upon phagocytosis by murine macrophage; intron in 5'-UTR	GO:0006412 translation |	GO:0003735 structural constituent of ribosome |
orf19.6375	1.0011	1.0464	0.825662	0.347081	0.277384	0.985904	RPS20	Putative ribosomal protein; genes encoding cytoplasmic ribosomal subunits, translation factors, and tRNA synthetases are downregulated upon phagocytosis by murine macrophage; transcription is positively regulated by Tbf1p	GO:0006412 translation | GO:0000462 maturation of SSU-rRNA from tricistronic rRNA transcript (SSU-rRNA, 5.8S rRNA, LSU-rRNA) |	GO:0003735 structural constituent of ribosome |	GO:0022627 cytosolic small ribosomal subunit |
orf19.6265	1.03722	0.98525	0.776812	0.4322	0.319193	0.953438	RPS22A	Predicted ribosomal protein; genes encoding cytoplasmic ribosomal subunits, translation factors, and tRNA synthetases are downregulated upon phagocytosis by murine macrophage
orf19.5982	1.07803	0.950983	0.743304	0.283701	0.304274	1.02731	RPL18	Predicted ribosomal protein; Plc1p-regulated, Tbf1p-activated; genes encoding cytoplasmic ribosomal subunits, translation factors, and tRNA synthetases are downregulated upon phagocytosis by murine macrophage	GO:0006412 translation |	GO:0003735 structural constituent of ribosome |
orf19.2864.1	0.993874	0.885729	0.826318	0.309194	0.325072	0.86633	RPL28	Putative ribosomal protein; Plc1p-regulated; genes encoding cytoplasmic ribosomal subunits, translation factors, and tRNA synthetases are downregulated upon phagocytosis by murine macrophage	GO:0006412 translation |	GO:0003735 structural constituent of ribosome | GO:0003723 RNA binding |	GO:0005634 nucleus |
orf19.7048.1	1.06054	0.978618	0.786189	0.333618	0.344504	0.799517	RPS28B	Putative ribosomal protein S28B; ORF Predicted by Annotation Working Group	GO:0006412 translation | GO:0006407 rRNA export from nucleus |	GO:0003735 structural constituent of ribosome |	GO:0022627 cytosolic small ribosomal subunit |
orf19.6663	1.01682	0.992895	0.827666	0.318461	0.368093	0.765646	RPS25B	Predicted ribosomal protein; macrophage/pseudohyphal-induced after 16 h; downregulated upon phagocytosis by murine macrophage; transcription is positively regulated by Tbf1p; intron in 5'-UTR	GO:0006412 translation |	GO:0003735 structural constituent of ribosome |	GO:0022627 cytosolic small ribosomal subunit |
orf19.3789	0.964379	0.95623	0.961053	0.373909	0.359333	0.796964	RPL24A	Predicted ribosomal protein; genes encoding cytoplasmic ribosomal subunits, translation factors, and tRNA synthetases are downregulated upon phagocytosis by murine macrophage; intron in 5'-UTR	GO:0006412 translation |	GO:0003735 structural constituent of ribosome | GO:0003723 RNA binding |
orf19.5996.1	1.02829	1.05174	1.08768	0.486355	0.455622	0.829883	RPS19A	Putative ribosomal protein; ORF Predicted by Annotation Working Group; protein level decreased in stationary phase cultures	GO:0042274 ribosomal small subunit biogenesis | GO:0006407 rRNA export from nucleus |	GO:0003735 structural constituent of ribosome |	GO:0022627 cytosolic small ribosomal subunit |
orf19.6852.1				0.358384	0.321532	0.728772		ORF added to Assembly 21 based on comparative genome analysis
orf19.493	1.01795	1.06767	1.08768	0.286288	0.298323	0.828163	RPL15A	Putative ribosomal protein; genes encoding cytoplasmic ribosomal subunits, translation factors, and tRNA synthetases are downregulated upon phagocytosis by murine macrophage; transcription is positively regulated by Tbf1p	GO:0006412 translation |	GO:0003723 RNA binding | GO:0003735 structural constituent of ribosome |	GO:0022625 cytosolic large ribosomal subunit |
orf19.5928	1.01795	1.06767	1.08768	0.3953	0.356616	0.91137	RPP2B	Conserved acidic ribosomal protein, likely to be involved in regulation of translation elongation; interacts with Rpp1Ap; one of four similar C. albicans ribosomal proteins (Rpp1Ap, Rpp1Bp, Rpp2Ap, Rpp2Bp); macrophage/pseudohyphal-induced	GO:0006412 translation | GO:0006414 translational elongation |	GO:0003735 structural constituent of ribosome |	GO:0005840 ribosome |
orf19.6975	1.01795	1.06767	1.08768	0.402429	0.377913	0.939644	YST1	Ribosome-associated protein; antigenic in mouse; complements S. cerevisiae yst1 yst2 mutant; similar to laminin-binding proteins, but does not bind laminin; possible S/T phosphorylation, N-glycosylation, myristoylation, Gcn4p-regulated	GO:0006412 translation | GO:0006407 rRNA export from nucleus | GO:0000447 endonucleolytic cleavage in ITS1 to separate SSU-rRNA from 5.8S rRNA and LSU-rRNA from tricistronic rRNA transcript (SSU-rRNA, 5.8S rRNA, LSU-rRNA) | GO:0000461 endonucleolytic cleavage to generate mature 3'-end of SSU-rRNA from (SSU-rRNA, 5.8S rRNA, LSU-rRNA) | GO:0000028 ribosomal small subunit assembly |	GO:0003735 structural constituent of ribosome |	GO:0016021 integral to membrane | GO:0005840 ribosome | GO:0005625 soluble fraction | GO:0005624 membrane fraction | GO:0030686 90S preribosome | GO:0022627 cytosolic small ribosomal subunit |
orf19.7018	1.07226	1.06767	1.08768	0.447022	0.399372	0.945331	RPS18	Predicted ribosomal protein; genes encoding cytoplasmic ribosomal subunits, translation factors, and tRNA synthetases are downregulated upon phagocytosis by murine macrophage; repressed by nitric oxide	GO:0006412 translation | GO:0006407 rRNA export from nucleus | GO:0000447 endonucleolytic cleavage in ITS1 to separate SSU-rRNA from 5.8S rRNA and LSU-rRNA from tricistronic rRNA transcript (SSU-rRNA, 5.8S rRNA, LSU-rRNA) |	GO:0003735 structural constituent of ribosome |	GO:0005739 mitochondrion |
orf19.5225.2	1.01795	1.06767	1.08768	0.400971	0.3724	1.027	RPL27A	Predicted ribosomal protein	GO:0006412 translation |	GO:0003735 structural constituent of ribosome |	GO:0032040 small-subunit processome |
orf19.2426	1.01007	0.905306	1.15994	0.256645	0.493638	0.880949		Predicted ORF in Assemblies 19, 20 and 21			GO:0005634 nucleus | GO:0005737 cytoplasm |
orf19.5927	1.0516	1.07075	1.08768	0.172098	0.327873	0.903629	RPS15	Putative ribosomal protein; macrophage/pseudohyphal-induced after 16 h; genes encoding cytoplasmic ribosomal subunits, translation factors, and tRNA synthetases are downregulated upon phagocytosis by murine macrophage	GO:0006412 translation | GO:0006407 rRNA export from nucleus |	GO:0003735 structural constituent of ribosome |
orf19.3504	1.04246	1.06747	1.08748	0.229697	0.406463	0.827446	RPL23A	Putative ribosomal protein; genes encoding cytoplasmic ribosomal subunits, translation factors, and tRNA synthetases are downregulated upon phagocytosis by murine macrophage	GO:0006412 translation | GO:0042493 response to drug |	GO:0003735 structural constituent of ribosome |
orf19.2994.1	0.908378	0.989336	1.00789	0.216959	0.389159	0.963013	RPS16A	Macrophage/pseudohyphal-induced after 16 h	GO:0006412 translation | GO:0000462 maturation of SSU-rRNA from tricistronic rRNA transcript (SSU-rRNA, 5.8S rRNA, LSU-rRNA) |	GO:0003735 structural constituent of ribosome |	GO:0030686 90S preribosome |
orf19.827.1	1.01795	1.2184	1.08768	0.284743	0.380775	0.939046	RPL39	Ribosomal protein L39; transcription is induced upon germ tube formation; shows colony morphology-related gene regulation by Ssn6p	GO:0006412 translation |	GO:0003735 structural constituent of ribosome | GO:0003723 RNA binding |	GO:0022625 cytosolic large ribosomal subunit |
orf19.6906	1.01795	0.999537	1.08768	0.268329	0.344714	0.967463	ASC1	40S ribosomal subunit protein; similar to G-beta subunits; antigenic in human, murine infection; soluble in hyphae; iron, temperature, Gcn4p regulated; amino acid starvation (3-aminotriazole)-, caspofungin-, farnesol-downregulated	GO:0010526 negative regulation of transposition, RNA-mediated | GO:0007186 G-protein coupled receptor protein signaling pathway | GO:0017148 negative regulation of translation | GO:0001403 invasive growth in response to glucose limitation | GO:0010255 glucose mediated signaling pathway |	GO:0005092 GDP-dissociation inhibitor activity | GO:0001965 G-protein alpha-subunit binding | GO:0004871 signal transducer activity |	GO:0005625 soluble fraction | GO:0022627 cytosolic small ribosomal subunit |
orf19.840	1.14191	1.0157	0.867681	0.320572	0.482803	0.847961	RPL21A	Putative ribosomal protein; genes encoding cytoplasmic ribosomal subunits, translation factors, and tRNA synthetases are downregulated upon phagocytosis by murine macrophage	GO:0006412 translation |	GO:0003735 structural constituent of ribosome |
orf19.3572.3	1.07734	1.02305	0.910283	0.378213	0.482374	0.976756		ORF Predicted by Annotation Working Group	GO:0006412 translation | GO:0006450 regulation of translational fidelity |	GO:0003735 structural constituent of ribosome |	GO:0022625 cytosolic large ribosomal subunit |
orf19.4149.1	1.0273	0.926961	0.908874	0.269265	0.3857	0.963697		ORF Predicted by Annotation Working Group	GO:0006412 translation | GO:0000028 ribosomal small subunit assembly | GO:0000462 maturation of SSU-rRNA from tricistronic rRNA transcript (SSU-rRNA, 5.8S rRNA, LSU-rRNA) |	GO:0003735 structural constituent of ribosome |	GO:0030686 90S preribosome | GO:0022627 cytosolic small ribosomal subunit |
orf19.2425.2	0.957816	1.02187	0.944717	0.326683	0.402854	0.834226		Putative ribosomal protein; Plc1p-regulated; genes encoding cytoplasmic ribosomal subunits, translation factors, and tRNA synthetases are downregulated upon phagocytosis by murine macrophage; merged with orf19.2864.1 in Assembly 20
orf19.7015	0.965669	1.06767	1.08433	0.327052	0.400489	0.733177	RPP0	Putative ribosomal protein; antigenic in mouse; biofilm induced; cytoplasmic ribosomal subunit, translation factor, and tRNA synthetase genes are downregulated upon phagocytosis by murine macrophage; transcription induced by Tbf1p	GO:0006414 translational elongation | GO:0000027 ribosomal large subunit assembly |	GO:0003735 structural constituent of ribosome | GO:0070180 LSU rRNA binding |	GO:0030686 90S preribosome |
orf19.2992	1.01795	1.03092	1.0492	0.292214	0.400196	0.707424	RPP1A	Conserved acidic ribosomal protein, likely to be involved in regulation of translation elongation; interacts with Rpp2Bp; one of four similar C. albicans ribosomal proteins (Rpp1Ap, Rpp1Bp, Rpp2Ap, Rpp2Bp)	GO:0006412 translation | GO:0006414 translational elongation |	GO:0003735 structural constituent of ribosome |	GO:0005840 ribosome |
orf19.4931.1	1.11124	0.824364	1.00893	0.304548	0.359465	0.989475	RPL14	ORF Predicted by Annotation Working Group	GO:0006412 translation |	GO:0003735 structural constituent of ribosome | GO:0003723 RNA binding |
orf19.6002	0.77658	1.06767	1.05823	0.387533	0.456874	0.915297	RPL8B	Predicted ribosomal protein; transcription is regulated upon yeast-hyphal switch; genes encoding cytoplasmic ribosomal subunits, translation factors, and tRNA synthetases are downregulated upon phagocytosis by murine macrophage	GO:0006412 translation |	GO:0003735 structural constituent of ribosome |
orf19.1626	0.75452	0.825531	0.770843	0.191307	0.457817	0.897265		Predicted ORF in Assemblies 19, 20 and 21	GO:0050983 spermidine catabolic process to deoxyhypusine, using deoxyhypusine synthase | GO:0008612 peptidyl-lysine modification to hypusine |	GO:0016765 transferase activity, transferring alkyl or aryl (other than methyl) groups |	GO:0005737 cytoplasm |
orf19.6541	0.961658	0.87134	0.708799	0.20952	0.413813	0.888027	RPL5	Predicted ribosomal protein; genes encoding cytoplasmic ribosomal subunits, translation factors, and tRNA synthetases are downregulated upon phagocytosis by murine macrophage	GO:0006412 translation | GO:0000027 ribosomal large subunit assembly |	GO:0003735 structural constituent of ribosome | GO:0003723 RNA binding |
orf19.6220.4	1.04424	0.947818	0.794299	0.233793	0.470043	0.85637		ORF Predicted by Annotation Working Group	GO:0006412 translation |	GO:0003735 structural constituent of ribosome |
orf19.1700	1.0175	0.924231	0.735016	0.0463339	0.313929	0.584548	RPS7A	Predicted ribosomal protein; genes encoding cytoplasmic ribosomal subunits, translation factors, and tRNA synthetases are downregulated upon phagocytosis by murine macrophage	GO:0006412 translation | GO:0042254 ribosome biogenesis |	GO:0003735 structural constituent of ribosome |	GO:0032040 small-subunit processome | GO:0030686 90S preribosome |
orf19.3788.1	1.13558	1.17614	0.678449	0.243978	0.467141	0.947178	RPL30	Similar to S. cerevisiae L30 ribosomal subunit; pre-mRNA is alternatively spliced to productive and unproductive transcripts; splicing is temperature-regulated; colony morphology-related gene regulation by Ssn6p; regulated by Nrg1p, Tup1p	GO:0006417 regulation of translation | GO:0006412 translation | GO:0000398 nuclear mRNA splicing, via spliceosome | GO:0006364 rRNA processing | GO:0048025 negative regulation of nuclear mRNA splicing, via spliceosome |	GO:0030627 pre-mRNA 5'-splice site binding | GO:0003735 structural constituent of ribosome |	GO:0005737 cytoplasm |
orf19.6882.1	0.916665	1.06767	0.685895	0.278182	0.410984	0.760715		ORF Predicted by Annotation Working Group	GO:0006412 translation |	GO:0003735 structural constituent of ribosome |	GO:0022625 cytosolic large ribosomal subunit |
orf19.3564	1.26655	1.36206	1.05067	0.263264	0.480962	0.955328	RPC40	Predicted ORF in Assemblies 19, 20 and 21; protein level decreased in stationary phase cultures	GO:0006383 transcription from RNA polymerase III promoter | GO:0006360 transcription from RNA polymerase I promoter |	GO:0003899 DNA-directed RNA polymerase activity |	GO:0005666 DNA-directed RNA polymerase III complex | GO:0005736 DNA-directed RNA polymerase I complex |
orf19.6873	0.56172	1.12349	1.05978	0.491159	0.392705	0.908736	RPS8A	Putative ribosomal protein; similar to S. cerevisiae Rps8Bp; gene is induced by ciclopirox olamine treatment; genes encoding cytoplasmic ribosomal subunits are downregulated upon phagocytosis by murine macrophage; intron in 5'-UTR	GO:0000462 maturation of SSU-rRNA from tricistronic rRNA transcript (SSU-rRNA, 5.8S rRNA, LSU-rRNA) |	GO:0003735 structural constituent of ribosome |	GO:0005840 ribosome | GO:0030686 90S preribosome | GO:0022627 cytosolic small ribosomal subunit |
orf19.5760	1.52859	1.78379	2.84923	0.217855	0.225704	0.870928	IHD1	Putative GPI-anchored protein of unknown function; alkaline upregulated; greater transcription in hyphal form than yeast form; regulated by Nrg1p, Rfg1p, Tup1p; regulated by Tsa1p, Tsa1Bp in minimal media at 37; not essential for viability			GO:0009986 cell surface | GO:0016021 integral to membrane |
orf19.898	1.08183	1.3243	1.35946	0.394872	0.304987	0.626366	HEM2	Protein described as porphobilinogen synthase; transcriptionally regulated by iron; expression greater in high iron; protein level decreased in stationary phase cultures	GO:0006783 heme biosynthetic process |	GO:0004655 porphobilinogen synthase activity |	GO:0005634 nucleus | GO:0005737 cytoplasm |
orf19.1470	1.04698	1.0808	1.06188	0.477323	0.283668	0.897296	RPS26A	Predicted ribosomal protein; regulated by Nrg1p, Tup1p; genes encoding cytoplasmic ribosomal subunits, translation factors, and tRNA synthetases are downregulated upon phagocytosis by murine macrophage; intron in 5'-UTR	GO:0006412 translation | GO:0006407 rRNA export from nucleus |	GO:0003735 structural constituent of ribosome |
orf19.7111.1	0.60044	2.15919	3.99955	0.599007	0.45417	0.483922	SOD3	Cytosolic manganese-containing superoxide dismutase, involved in protection against oxidative stress; transcription downregulated by treatment with ciclopirox olamine, induced during stationary phase when SOD1 expression is repressed	GO:0006979 response to oxidative stress | GO:0006800 oxygen and reactive oxygen species metabolic process |	GO:0004784 superoxide dismutase activity |	GO:0005829 cytosol | GO:0005759 mitochondrial matrix |
orf19.4450.1	0.378649	0.72251	4.74963	0.282431	0.232456	0.924096		ORF Predicted by Annotation Working Group
orf19.7296	1.13447	0.812937	1.06589	0.872245	0.319746	0.309978		Predicted ORF in Assemblies 19, 20 and 21; similar to stomatin mechanoreception protein; induced by Rgt1p			GO:0005886 plasma membrane |
orf19.732	0.891174	0.934013	1.24097	1.08609	0.233324	0.194684		Predicted ORF in Assemblies 19, 20 and 21; transcription is upregulated in both intermediate and mature biofilms	GO:0009062 fatty acid catabolic process |	GO:0008670 2,4-dienoyl-CoA reductase (NADPH) activity |	GO:0005782 peroxisomal matrix |
orf19.6840	0.93111	0.930527	1.01312	1.35814	0.244165	0.17625		Predicted ORF in Assemblies 19, 20 and 21; transcription is induced in response to alpha pheromone in SpiderM medium
orf19.7666	0.838629	1.00246	0.840246	1.41657	0.309065	0.280726		Predicted membrane transporter, member of the anion:cation symporter (ACS) family, major facilitator superfamily (MFS)	GO:0006820 anion transport |	GO:0015296 anion |	GO:0016020 membrane |
orf19.2618	0.842691	1.05633	0.951278	1.55467	0.479899	0.374209	MET2	Putative homoserine acetyltransferase; Gcn4p-regulated; macrophage/pseudohyphal-repressed; not greatly biofilm induced, in contrast to many sulfur amino acid metabolic genes; no human or murine homolog; virulence-group-correlated expression	GO:0009086 methionine biosynthetic process | GO:0009092 homoserine metabolic process |	GO:0004414 homoserine O-acetyltransferase activity |	GO:0005737 cytoplasm |
orf19.7550	0.657365	0.906624	1.78716	1.33129	0.224635	0.257488	IFA14	Predicted ORF in Assemblies 19, 20 and 21; Plc1p-regulated; transcription is induced in response to alpha pheromone in SpiderM medium
orf19.1421	1.11451	1.52278	1.23263	0.61424	0.04598	0.199297		Predicted ORF in Assemblies 19, 20 and 21	GO:0000256 allantoin catabolic process |	GO:0004848 ureidoglycolate hydrolase activity |	GO:0016020 membrane |
orf19.897	1.26696	1.07458	0.470454	1.1004	0.501815	0.212272		Predicted ORF in Assemblies 19, 20 and 21	GO:0070676 intralumenal vesicle formation | GO:0045324 late endosome to vacuole transport |	GO:0005515 protein binding |	GO:0000815 ESCRT III complex |
orf19.1167	1.54677	1.24996	0.914524	1.70979	0.39478	0.0853329		Predicted ORF in Assemblies 19, 20 and 21	GO:0044273 sulfur compound catabolic process |	GO:0000907 sulfonate dioxygenase activity |
orf19.5059	1.55215	1.19426	0.7631	1.13086	0.441629	0.266127	GCS1	Gamma-glutamylcysteine synthetase; enzyme of glutathione synthesis; similar to Hansenula polymorpha Gsh2p; induced on early/intermediate biofilm formation, in low iron, H2O2, Cd, or presence of human neutrophils; possibly adherence-induced	GO:0006750 glutathione biosynthetic process | GO:0042542 response to hydrogen peroxide | GO:0042493 response to drug | GO:0046686 response to cadmium ion |	GO:0004357 glutamate-cysteine ligase activity |	GO:0005622 intracellular |
orf19.24	2.78473	1.05044	0.824181	1.88125	0.260857	0.215185	RTA2	Putative floppase; required for sphingolipid long chain base release; mediates calcineurin-dependent resistance to azoles; stress-associated protein; Ca2+, calcineurin-regulated; ketoconazole, caspofungin induced; Plc1p-regulated	GO:0042493 response to drug | GO:0045332 phospholipid translocation | GO:0015908 fatty acid transport | GO:0046519 sphingoid metabolic process | GO:0034204 lipid translocation |	GO:0004012 phospholipid-translocating ATPase activity |	GO:0005783 endoplasmic reticulum | GO:0016021 integral to membrane | GO:0005886 plasma membrane |
orf19.5249	1.38333	1.7365	1.62374	0.781475	0.428857	0.362986		Predicted ORF in Assemblies 19, 20 and 21
orf19.7204	1.46704	1.92565	1.7013	0.7789	0.291865	0.293198		Predicted ORF in Assemblies 19, 20 and 21			GO:0005737 cytoplasm |
orf19.720	2.14993	2.92444	1.57379	0.914031	0.0900326	0.0798522	GST3	Expression is regulated upon white-opaque switching; upregulated in the presence of human neutrophils; peroxide-induced; induced in response to alpha pheromone in SpiderM medium	GO:0006808 regulation of nitrogen utilization |	GO:0003714 transcription corepressor activity |	GO:0005625 soluble fraction |
orf19.2863.1	1.59992	1.98891	1.90463	0.583902	0.456563	0.256552		ORF Predicted by Annotation Working Group	GO:0045041 protein import into mitochondrial intermembrane space | GO:0006879 cellular iron ion homeostasis | GO:0006979 response to oxidative stress |	GO:0016971 flavin-linked sulfhydryl oxidase activity |	GO:0005758 mitochondrial intermembrane space |
orf19.1048	1.22828	3.31797	3.10393	0.588782	0.29064	0.130899	IFD6	Aldo-keto reductase family member; similar to aryl alcohol dehydrogenases, S. cerevisiae Ypl088wp; increased protein correlates with MDR1 overexpression (but not CDR1 or CDR2) in fluconazole-resistant clinical isolates; farnesol regulated	GO:0006081 cellular aldehyde metabolic process | GO:0042710 biofilm formation |	GO:0018456 aryl-alcohol dehydrogenase activity |
orf19.2175	1.34438	2.86385	2.89277	0.275445	0.188723	0.172439		Predicted ORF in Assemblies 19, 20 and 21; induced by nitric oxide	GO:0043065 positive regulation of apoptosis | GO:0000304 response to singlet oxygen |		GO:0005886 plasma membrane | GO:0005739 mitochondrion | GO:0005634 nucleus |
orf19.5179	2.63841	1.39133	1.48718	0.435008	0.172483	0.0878786	LIP5	Secreted lipase, member of differentially expressed lipase gene family with possible roles in nutrition and acidic microenvironment; LIP5 and LIP8 expressed at all stages of mucosal and systemic infection; affects filamentous growth	GO:0016042 lipid catabolic process | GO:0030447 filamentous growth |	GO:0016298 lipase activity |	GO:0005576 extracellular region |
orf19.4057	1.37367	1.17014	1.03722	0.811297	0.496709	0.412117		Predicted ORF in Assemblies 19, 20 and 21
orf19.2498	1.34195	1.34408	1.05334	0.713876	0.441712	0.297534		Predicted ORF in Assemblies 19, 20 and 21; oxidative stress-induced via Cap1p	GO:0006325 chromatin organization |
orf19.747	1.53658	1.40016	1.07323	0.492367	0.244453	0.146558	NBP35	Similar to nucleotide-binding proteins; increased transcription is observed upon benomyl treatment; transcription is induced upon filamentous growth	GO:0016226 iron-sulfur cluster assembly | GO:0002098 tRNA wobble uridine modification |	GO:0000166 nucleotide binding | GO:0005506 iron ion binding | GO:0016887 ATPase activity | GO:0051539 4 iron, 4 sulfur cluster binding |	GO:0005634 nucleus | GO:0005625 soluble fraction | GO:0005737 cytoplasm |
orf19.6020	1.66695	1.78685	1.24139	0.474009	0.247246	0.236198		Predicted ORF in Assemblies 19, 20 and 21	GO:0006501 C-terminal protein lipidation | GO:0034727 piecemeal microautophagy of nucleus | GO:0032258 CVT pathway | GO:0000045 autophagic vacuole formation |	GO:0019776 Atg8 ligase activity |	GO:0005829 cytosol |
orf19.2633.1	2.41601	3.7097	1.21045	0.327265	0.0546818	0.0703894		ORF added to Assembly 21 based on comparative genome analysis
orf19.6464	1.45641	1.58517	1.24505	0.676378	0.332219	0.28382		Predicted ORF in Assemblies 19, 20 and 21; induced upon adherence to polystyrene; oxidative stress-induced via Cap1p
orf19.5259	1.52062	2.03602	1.09311	0.64268	0.312115	0.205249		Predicted ORF in Assemblies 19, 20 and 21
orf19.271	1.44748	1.34008	1.53259	0.380101	0.199134	0.218847	ADH4	Protein not essential for viability; transcription is increased in an azole-resistant strain overexpressing MDR1; transcription is increased in populations of cells exposed to fluconazole over multiple generations	GO:0009062 fatty acid catabolic process |	GO:0008670 2,4-dienoyl-CoA reductase (NADPH) activity |	GO:0005782 peroxisomal matrix |
orf19.4843	1.24579	1.22906	1.19223	0.68636	0.456025	0.473152		Predicted ORF in Assemblies 19, 20 and 21	GO:0006875 cellular metal ion homeostasis |	GO:0016722 oxidoreductase activity, oxidizing metal ions |
orf19.2623	1.53961	1.28969	1.1951	0.461412	0.219112	0.221363	ECM22	Putative transcription factor with zinc cluster DNA-binding motif	GO:0016126 sterol biosynthetic process | GO:0006355 regulation of transcription, DNA-dependent |	GO:0003702 RNA polymerase II transcription factor activity | GO:0003700 transcription factor activity |	GO:0005634 nucleus | GO:0005737 cytoplasm |
orf19.3537	1.99462	1.41795	1.15359	0.25241	0.0953385	0.0794959		Predicted ORF in Assemblies 19, 20 and 21; regulated by Tsa1p, Tsa1Bp in minimal media at 37 deg	GO:0006979 response to oxidative stress |	GO:0032542 sulfiredoxin activity |	GO:0005634 nucleus | GO:0005737 cytoplasm |
orf19.6984	1.40513	1.10624	1.05881	0.466458	0.283984	0.344065		Predicted ORF in Assemblies 19, 20 and 21
orf19.4955	1.72836	1.03682	1.26678	0.675004	0.258401	0.290885		Predicted ORF in Assemblies 19, 20 and 21	GO:0030476 ascospore wall assembly |
orf19.3606	1.40197	1.04126	0.938577	0.683689	0.382642	0.431933		Predicted ORF in Assemblies 19, 20 and 21; transcriptionally activated by Mnl1p under weak acid stress
orf19.5290	1.17821	1.19932	1.34932	0.879608	0.333298	0.271445		Transcription is negatively regulated by Sfu1p
orf19.3234	1.67132	1.73524	1.5503	0.564742	0.0835817	0.035641	OYE22	Predicted ORF in Assemblies 19, 20 and 21; transcription is upregulated in both intermediate and mature biofilms		GO:0003959 NADPH dehydrogenase activity |
orf19.4373	1.18049	1.1265	1.07129	0.709375	0.323022	0.309068		Protein similar to S. cerevisiae Fmn1p, which is riboflavin kinase; predicted Kex2p substrate	GO:0009398 FMN biosynthetic process |	GO:0003919 FMN adenylyltransferase activity | GO:0008531 riboflavin kinase activity |	GO:0005792 microsome | GO:0005743 mitochondrial inner membrane |
orf19.1887	0.887663	1.18872	1.12372	0.76397	0.451395	0.36699		Predicted ORF in Assemblies 19, 20 and 21	GO:0016125 sterol metabolic process |	GO:0004771 sterol esterase activity |	GO:0005811 lipid particle | GO:0016021 integral to membrane |
orf19.2337	1.13155	1.43265	0.737692	0.848757	0.407591	0.397315	ALP1	Putative high-affinity basic amino acid permease; fungal-specific (no human or murine homolog)	GO:0015802 basic amino acid transport |	GO:0015174 basic amino acid transmembrane transporter activity |	GO:0005886 plasma membrane |
orf19.5770	2.04731	2.01047	0.702003	0.643984	0.176601	0.0959045	OPT8	Possible oligopeptide transporter; similar to Opt1p and to S. cerevisiae Ygl114wp, but not other OPTs; induced by nitric oxide, amphotericin B; expression of OPT6, -7, or -8 does not suppress defect of mutant lacking Opt1p, Opt2p, and Opt3p	GO:0006857 oligopeptide transport |	GO:0015198 oligopeptide transporter activity |
orf19.4145	2.68329	2.18964	1.42244	0.394808	0.243991	0.208269	ZCF20	Predicted zinc-finger protein of unknown function	GO:0045944 positive regulation of transcription from RNA polymerase II promoter | GO:0009060 aerobic respiration |	GO:0003704 specific RNA polymerase II transcription factor activity |	GO:0005634 nucleus |
orf19.4757	2.28517	1.88502	1.29028	0.360914	0.239994	0.233335	NAR1	Predicted ORF in Assemblies 19, 20 and 21; induced by nitric oxide; oxidative stress-induced via Cap1p	GO:0016226 iron-sulfur cluster assembly |		GO:0016020 membrane | GO:0005829 cytosol |
orf19.5860				0.0766958	0.0255521	0.0245173		Predicted ORF from Assembly 19; removed from Assembly 20; subsequently reinstated in Assembly 21 based on comparative genome analysis
orf19.5785	4.20358	3.55484	1.36545	0.159106	0.0785955	0.0353803		Predicted ORF in Assemblies 19, 20 and 21; greater mRNA abundance observed in a cyr1 or ras1 homozygous null mutant than in wild type; induced by nitric oxide; possibly spurious ORF (Annotation Working Group prediction)
orf19.2285	5.47613	4.31426	1.92769	0.1165	0.0437495	0.0262339		Increased transcription is observed upon benomyl treatment	GO:0042493 response to drug |
orf19.6898	3.15734	2.58261	2.26211	0.138261	0.0691259	0.047555		Predicted ORF in Assemblies 19, 20 and 21; increased transcription is observed upon benomyl treatment or in an azole-resistant strain that overexpresses MDR1
orf19.3122	4.07653	2.75879	1.30476	0.221227	0.0692114	0.103539	ARR3	Protein not essential for viability; similar to S. cerevisiae Arr3p, which is an arsenite transporter of the plasma membrane required for resistance to arsenic compounds; benomyl-induced; Gcn4p-regulated	GO:0015700 arsenite transport |	GO:0015105 arsenite transmembrane transporter activity |	GO:0005887 integral to plasma membrane |
orf19.344	3.1238	3.59664	0.937936	0.107881	0.12274	0.109415		Predicted ORF in Assemblies 19, 20 and 21; increased transcription is observed upon fluphenazine treatment or in an azole-resistant strain that overexpresses CDR1 and CDR2; possibly transcriptionally regulated by Tac1p; possibly spurious ORF (Annotation Working Group prediction)
orf19.2825	2.02046	2.31899	1.10966	0.324835	0.347321	0.214282		Predicted ORF in Assemblies 19, 20 and 21; a-specific transcription	GO:0010421 hydrogen peroxide-mediated programmed cell death | GO:0016226 iron-sulfur cluster assembly | GO:0007064 mitotic sister chromatid cohesion |		GO:0005758 mitochondrial intermembrane space | GO:0005829 cytosol |
orf19.4337	2.53653	1.84422	1.31929	0.244435	0.247927	0.202693		Predicted membrane transporter, member of the monocarboxylate porter (MCP) family, major facilitator superfamily (MFS)	GO:0015718 monocarboxylic acid transport |	GO:0008028 monocarboxylic acid transmembrane transporter activity |	GO:0005739 mitochondrion | GO:0016020 membrane |
orf19.5759	4.9124	4.31327	1.9688	0.0521886	0.0550761	0.0896396	SNQ2	Protein similar to S. cerevisiae Snq2p transporter; member of PDR subfamily of ABC family; transposon mutation affects filamentation; benomyl-induced transcription; detected at yeast-form cell plasma membrane by mass spec	GO:0030447 filamentous growth | GO:0042493 response to drug | GO:0006810 transport | GO:0000304 response to singlet oxygen |	GO:0008559 xenobiotic-transporting ATPase activity | GO:0042626 ATPase activity, coupled to transmembrane movement of substances | GO:0005524 ATP binding |	GO:0016021 integral to membrane | GO:0005886 plasma membrane | GO:0005739 mitochondrion | GO:0005624 membrane fraction |
orf19.308	2.35799	1.29948	0.906926	0.306378	0.239937	0.246427		Predicted ORF in Assemblies 19, 20 and 21	GO:0042493 response to drug |		GO:0016020 membrane |
orf19.2368	1.13349	1.52459	1.06855	0.531494	0.420467	0.380434		Predicted ORF in Assemblies 19, 20 and 21		GO:0005515 protein binding |	GO:0005682 U5 snRNP | GO:0046540 U4/U6 x U5 tri-snRNP complex | GO:0000785 chromatin |
orf19.6957.3	1.34234	2.13921	0.950994	0.269424	0.302839	0.23445		ORF Predicted by Annotation Working Group; removed from Assembly 20
orf19.2231	2.42735	2.00737	1.02212	0.705965	0.397277	0.282474		Predicted ORF in Assemblies 19, 20 and 21
orf19.4949	2.43676	1.9614	0.904602	0.654048	0.409114	0.310803		Predicted ORF in Assemblies 19, 20 and 21
orf19.5258	2.24242	1.62002	1.11752	0.546331	0.438786	0.274047		Predicted ORF in Assemblies 19, 20 and 21; induced by nitric oxide
orf19.6326	2.82181	2.03881	0.715008	0.42568	0.397397	0.252291		Predicted ORF in Assemblies 19, 20 and 21	GO:0045944 positive regulation of transcription from RNA polymerase II promoter | GO:0007124 pseudohyphal growth |	GO:0003704 specific RNA polymerase II transcription factor activity |	GO:0005634 nucleus | GO:0005737 cytoplasm |
orf19.4284	2.67744	2.38788	1.03402	0.74905	0.539149	0.358137	BUR2	Protein with similarity to S. cerevisiae Bur2p, contains a cyclin domain; not required for wild-type hyphal growth, adherence to buccal epithelial cells, or virulence in mouse systemic infection	GO:0006350 transcription | GO:0000070 mitotic sister chromatid segregation |	GO:0016538 cyclin-dependent protein kinase regulator activity |
orf19.3639	2.52819	2.3571	1.69708	0.472923	0.258232	0.120592		Predicted ORF in Assemblies 19, 20 and 21	GO:0006307 DNA dealkylation |	GO:0003905 alkylbase DNA N-glycosylase activity |
orf19.1623	2.23598	2.30992	1.34562	0.557743	0.408726	0.235667	CAP1	Transcription factor, AP-1 family; role in oxidative stress response and resistance, multidrug resistance; oxidative stress regulates nuclear localization; partially complements S. cerevisiae yap1 mutation; human neutrophil-induced	GO:0006979 response to oxidative stress | GO:0042493 response to drug | GO:0046686 response to cadmium ion | GO:0020012 evasion or tolerance of host immune response | GO:0006355 regulation of transcription, DNA-dependent | GO:0043619 regulation of transcription from RNA polymerase II promoter in response to oxidative stress | GO:0045944 positive regulation of transcription from RNA polymerase II …	GO:0003700 transcription factor activity | GO:0030528 transcription regulator activity | GO:0003702 RNA polymerase II transcription factor activity |	GO:0005737 cytoplasm | GO:0005634 nucleus |
orf19.7003	2.68468	2.98546	1.45658	0.339631	0.364018	0.137965		Predicted ORF from Assembly 19; possibly spurious ORF (Annotation Working Group prediction); removed from Assembly 20
orf19.3395	1.70668	2.07394	1.06584	0.675156	0.48109	0.29009		Predicted membrane transporter, member of the drug:proton antiporter (12 spanner) (DHA1) family, major facilitator superfamily (MFS); induced by nitric oxide, oxidative stress, alpha pheromone; fungal-specific (no human or murine homolog)	GO:0015893 drug transport |	GO:0015238 drug transporter activity |	GO:0016020 membrane |
orf19.1069	1.94301	1.8881	1.33057	0.586612	0.408749	0.387182	RPN4	DNA binding protein with Cys2-His2 zinc-finger; putative regulator of proteasome genes; DNA recognition sequence (GAAGGCAAAA) enriched in regions upstream of proteasome genes; induced in core stress response	GO:0006357 regulation of transcription from RNA polymerase II promoter | GO:0043161 proteasomal ubiquitin-dependent protein catabolic process | GO:0000086 G2/M transition of mitotic cell cycle | GO:0045732 positive regulation of protein catabolic process | GO:0045941 positive regulation of transcription | GO:0045739 positive regulation of DNA repair | GO:0046685 response to arsenic |	GO:0003700 transcription factor activity | GO:0043565 sequence-specific DNA binding | GO:0004175 endopeptidase activity | GO:0016563 transcription activator activity |	GO:0005838 proteasome regulatory particle |
orf19.4907	2.64766	2.66544	1.86476	0.364104	0.276744	0.197387		Predicted ORF in Assemblies 19, 20 and 21; increased transcription is observed upon fluphenazine treatment; possibly transcriptionally regulated by Tac1p; induced by nitric oxide; fungal-specific (no human or murine homolog)	GO:0008361 regulation of cell size |		GO:0005737 cytoplasm |
orf19.4155.12	2.80753	3.30363	1.88624	0.420273	0.293934	0.171504		ORF Predicted by Annotation Working Group; removed from Assembly 20
orf19.1027	4.39195	3.30065	1.7854	0.202925	0.181566	0.0963794	PDR16	Phosphatidylinositol transfer protein; increased transcription correlates with CDR1 and CDR2 overexpression and azole resistance; induced by fluphenazine, 17-beta-estradiol, ethynyl estradiol, nitric oxide; farnesol-downregulated in biofilm	GO:0042493 response to drug | GO:0016126 sterol biosynthetic process | GO:0015914 phospholipid transport |	GO:0008526 phosphatidylinositol transporter activity |	GO:0001950 plasma membrane enriched fraction | GO:0005811 lipid particle | GO:0005792 microsome |
orf19.2067	2.25474	2.47303	1.67476	0.575635	0.443365	0.374129		Predicted ORF in Assemblies 19, 20 and 21	GO:0006880 intracellular sequestering of iron ion | GO:0016226 iron-sulfur cluster assembly |		GO:0005759 mitochondrial matrix |
orf19.3971	4.67196	6.18523	1.55743	0.363688	0.233249	0.132281		Predicted ORF in Assemblies 19, 20 and 21
orf19.4653	6.1174	5.61854	1.23873	0.273086	0.200088	0.113717		Transcriptionally regulated by iron; expression greater in low iron; similar to GPI-linked cell-wall proteins
orf19.3978	1.86312	1.77459	1.16152	0.452836	0.455276	0.720545		Predicted ORF in Assemblies 19, 20 and 21	GO:0040020 regulation of meiosis | GO:0000080 G1 phase of mitotic cell cycle | GO:0000462 maturation of SSU-rRNA from tricistronic rRNA transcript (SSU-rRNA, 5.8S rRNA, LSU-rRNA) |	GO:0045129 NAD-independent histone deacetylase activity | GO:0017136 NAD-dependent histone deacetylase activity |	GO:0005730 nucleolus |
orf19.5775.3	1.61251	2.20092	1.2186	0.444882	0.574065	0.474576		ORF Predicted by Annotation Working Group; removed from Assembly 21
orf19.6514	1.78865	1.74826	1.32782	0.426948	0.525235	0.486903	CUP9	Protein of unknown function, upregulated in clinical isolates from HIV+ patients with oral candidiasis; transcription reduced upon yeast-hyphal switch; ketoconazole-induced; Plc1p-regulated; shows colony morphology-related Ssn6p regulation	GO:0006367 transcription initiation from RNA polymerase II promoter | GO:0006878 cellular copper ion homeostasis |	GO:0003704 specific RNA polymerase II transcription factor activity | GO:0043565 sequence-specific DNA binding | GO:0003682 chromatin binding |	GO:0000790 nuclear chromatin |
orf19.7585	9.25856	1.67565	0.582056	0.26985	0.192347	0.205235	INO1	Inositol-1-phosphate synthase; enzyme of inositol biosynthesis; antigenic in human; repressed by farnesol (in biofilm) or caspofungin; regulated during planktonic growth; upstream inositol/choline regulatory element; glycosylation predicted	GO:0006021 inositol biosynthetic process |	GO:0004512 inositol-3-phosphate synthase activity |	GO:0009986 cell surface | GO:0030446 hyphal cell wall | GO:0005737 cytoplasm |
orf19.4531	3.47822	1.76297	0.88016	0.342639	0.333348	0.326993		Putative PDR-subfamily ABC transporter	GO:0006810 transport |	GO:0042626 ATPase activity, coupled to transmembrane movement of substances | GO:0005524 ATP binding |	GO:0016021 integral to membrane |
orf19.6811	2.08929	2.11067	1.64461	1.14746	0.329059	0.273957		Predicted ORF in Assemblies 19, 20 and 21	GO:0009102 biotin biosynthetic process | GO:0042493 response to drug | GO:0006826 iron ion transport |		GO:0005758 mitochondrial intermembrane space |
orf19.1286	3.16647	2.90121	1.40432	0.930849	0.219748	0.211836		Predicted ORF in Assemblies 19, 20 and 21
orf19.2165	5.06209	3.24297	1.74468	0.66321	0.184381	0.119829		Predicted ORF in Assemblies 19, 20 and 21; induced by nitric oxide
orf19.1125	3.73257	2.97354	1.70583	0.733577	0.219028	0.134637		Predicted ORF from Assembly 19; merged with orf19.2165 in Assembly 20
orf19.6548	3.52534	3.36974	1.76753	0.807933	0.307269	0.23591	ISU1	Protein with similarity to NifU; possible role in iron-sulfur cluster biogenesis; transcriptionally regulated by iron; expression greater in low iron; transcription is upregulated in both intermediate and mature biofilms	GO:0016226 iron-sulfur cluster assembly | GO:0006879 cellular iron ion homeostasis | GO:0002098 tRNA wobble uridine modification |	GO:0008198 ferrous iron binding |	GO:0005759 mitochondrial matrix |
orf19.1149	3.26278	3.73246	2.21434	0.927357	0.272612	0.134506	MRF1	Protein similar to mitochondrial respiratory proteins; increased transcription observed upon benomyl treatment; induced by farnesol, nitric oxide, core stress response; oxidative stress-induced via Cap1p	GO:0009060 aerobic respiration | GO:0007585 respiratory gaseous exchange |	GO:0003677 DNA binding |	GO:0005739 mitochondrion | GO:0005634 nucleus |
orf19.4474	4.15436	3.01076	1.52379	0.840704	0.431324	0.132534		Protein not essential for viability			GO:0005634 nucleus | GO:0005737 cytoplasm |
orf19.430	2.50173	2.02728	1.45182	1.12672	0.577307	0.341159		Predicted ORF in Assemblies 19, 20 and 21	GO:0007030 Golgi organization |	GO:0019001 guanyl nucleotide binding |
orf19.3130	2.73638	2.04202	1.18041	0.91206	0.498846	0.405393		Predicted ORF in Assemblies 19, 20 and 21
orf19.4290	4.0009	2.54687	1.4101	1.00989	0.356281	0.219436	TRR1	Putative thioredoxin reductase; upregulated in presence of human neutrophils; regulated by Tsa1p, Tsa1Bp; induced by nitric oxide; peroxide-induced; oxidative stress-induced via Cap1p; fungal-specific (no human/murine homolog)	GO:0045454 cell redox homeostasis | GO:0006979 response to oxidative stress |	GO:0004791 thioredoxin-disulfide reductase activity | GO:0008198 ferrous iron binding |	GO:0005829 cytosol |
orf19.2396	2.65143	3.34058	3.20661	0.915589	0.465922	0.210386	IFR2	Increased transcription is observed upon benomyl treatment; transcription is upregulated in response to treatment with ciclopirox olamine, alpha pheromone; regulated by oxidative stress (via Cap1p) and osmotic stress (via Hog1p)
orf19.2104	2.19933	2.30197	1.96516	0.949843	0.534669	0.396224		Predicted ORF in Assemblies 19, 20 and 21	GO:0009060 aerobic respiration | GO:0016226 iron-sulfur cluster assembly |	GO:0051087 chaperone binding |	GO:0005739 mitochondrion |
orf19.3443	5.59869	5.74162	1.80912	0.931048	0.500128	0.159125	OYE2	Putative NAPDH dehydrogenase; fungal-specific (no human or murine homolog); induced by nitric oxide		GO:0003959 NADPH dehydrogenase activity |	GO:0005739 mitochondrion | GO:0005634 nucleus |
orf19.3150	2.77475	3.41034	2.09798	0.761509	0.703892	0.272186	GRE2	Protein described as a reductase; transcription is regulated by Nrg1p and Tup1p; benomyl-induced; hyphal-induced; macrophage/pseudohyphal-repressed; expression greater in low iron; reported to be involved in osmotic stress response	GO:0006970 response to osmotic stress |	GO:0016491 oxidoreductase activity |
orf19.1340	2.97441	5.20285	2.14617	1.87063	0.545368	0.16809		Predicted ORF in Assemblies 19, 20 and 21; protein level decreased in stationary phase cultures	GO:0042180 cellular ketone metabolic process | GO:0006725 cellular aromatic compound metabolic process | GO:0043603 cellular amide metabolic process | GO:0006979 response to oxidative stress |	GO:0051269 alpha-keto ester reductase activity | GO:0004032 aldehyde reductase activity | GO:0051268 alpha-keto amide reductase activity |	GO:0001950 plasma membrane enriched fraction | GO:0005634 nucleus | GO:0005737 cytoplasm |
orf19.86	2.45823	2.91684	1.9418	1.52079	0.775816	0.250607		Protein described as glutathione peroxidase; macrophage-downregulated gene	GO:0006979 response to oxidative stress |	GO:0004602 glutathione peroxidase activity | GO:0047066 phospholipid-hydroperoxide glutathione peroxidase activity |	GO:0005622 intracellular |
orf19.2262	3.35427	3.57526	2.04641	1.62477	0.677283	0.212745		Predicted ORF in Assemblies 19, 20 and 21; similar to quinone oxidoreductases; increased transcription is observed upon benomyl treatment; induced by nitric oxide; oxidative stress-induced via Cap1p	GO:0006979 response to oxidative stress |	GO:0017091 AU-rich element binding | GO:0003960 NADPH |	GO:0005634 nucleus | GO:0005737 cytoplasm |
orf19.113	7.25285	14.1432	4.08345	0.977798	0.733348	0.025869	CIP1	Protein with slight similarity to plant isoflavone reductase; transcription induced by cadmium (specifically, not by other heavy metals or heat shock), yeast-hyphal switch, oxidative stress (via Cap1p), or macrophage interaction	GO:0046686 response to cadmium ion | GO:0006979 response to oxidative stress |		GO:0016020 membrane |
orf19.3139	3.52377	3.83119	1.61518	1.16958	0.878542	0.176904		Predicted ORF in Assemblies 19, 20 and 21; increased transcription is observed upon benomyl treatment; oxidative stress-induced via Cap1p
orf19.4476	1.96349	5.71315	3.69325	1.20784	0.540774	0.156512		Predicted ORF in Assemblies 19, 20 and 21	GO:0006081 cellular aldehyde metabolic process |	GO:0018456 aryl-alcohol dehydrogenase activity |
orf19.5257	1.82818	1.46564	1.34469	1.01906	0.468766	0.247644	LCB4	Putative sphingosine kinase; expression is Tac1p-regulated	GO:0019722 calcium-mediated signaling | GO:0006665 sphingolipid metabolic process |	GO:0017050 D-erythro-sphingosine kinase activity |	GO:0032541 cortical endoplasmic reticulum | GO:0005794 Golgi apparatus | GO:0005625 soluble fraction | GO:0005624 membrane fraction | GO:0005886 plasma membrane |
orf19.2461	1.89366	2.27783	1.41646	0.770065	0.298745	0.0821353	PRN4	Protein with similarity to pirins; increased transcription is observed upon benomyl treatment
orf19.2467	1.73272	1.49098	1.47723	1.24454	0.136013	0.0538581	PRN1	Protein with similarity to pirins; increased transcription is observed upon benomyl treatment and in response to alpha pheromone in SpiderM medium; transcriptionally activated by Mnl1p under weak acid stress
orf19.1237	1.66827	2.26946	1.21566	1.22955	0.390807	0.0878949	ARO9	Aromatic transaminase of the Ehrlich fusel oil pathway of aromatic alcohol biosynthesis; Rim101p-dependent pH-regulation (alkaline induced)	GO:0000949 aromatic amino acid family catabolic process to alcohol via Ehrlich pathway |	GO:0008793 aromatic-amino-acid |	GO:0005634 nucleus | GO:0005737 cytoplasm |
orf19.1763	3.815	3.32308	1.39926	2.0111	0.422588	0.0306131	IFR1	Predicted ORF in Assemblies 19, 20 and 21; induced by nitric oxide
orf19.5517	1.87915	3.8042	1.77652	0.997264	0.462535	0.115238		Similar to alcohol dehydrogenases; increased transcription is observed upon benomyl treatment; induced by nitric oxide; induced in core stress response; oxidative stress-induced via Cap1p	GO:0006081 cellular aldehyde metabolic process | GO:0006066 alcohol metabolic process |	GO:0008106 alcohol dehydrogenase (NADP+) activity |	GO:0005625 soluble fraction |
orf19.5741	2.16572	3.73215	3.02022	0.40598	0.225963	0.438141	ALS1	Adhesin; ALS family of cell-surface glycoproteins; adhesion, virulence roles; immunoprotective; in band at hyphal base; amyloid domain; biofilm-induced; Rfg1p, Ssk1p, growth-regulated; strain background affects expression	GO:0016337 cell-cell adhesion | GO:0030448 hyphal growth | GO:0030260 entry into host cell | GO:0007155 cell adhesion | GO:0009405 pathogenesis | GO:0044406 adhesion to host | GO:0000752 agglutination involved in conjugation with cellular fusion | GO:0044416 induction by symbiont of host defense response | GO:0044011 single-species biofilm formation on inanimate substrate | GO:0043709 cell adhesi…	GO:0005515 protein binding | GO:0050839 cell adhesion molecule binding |	GO:0009277 fungal-type cell wall | GO:0009986 cell surface | GO:0030445 yeast-form cell wall | GO:0030446 hyphal cell wall |
orf19.7306	3.11949	6.69116	4.44823	0.834669	0.37971	0.391036		Protein of aldo-keto reductase family; increased transcription associated with MDR1 overexpression, benomyl or long-term fluconazole treatment; overexpression does not affect drug or oxidative stress sensitivity			GO:0005634 nucleus | GO:0005737 cytoplasm |
orf19.318	1.78216	2.41249	2.60466	0.786174	0.502573	0.516211		Predicted ORF in Assemblies 19, 20 and 21	GO:0016226 iron-sulfur cluster assembly |		GO:0005759 mitochondrial matrix |
orf19.6586	10.057	10.4552	2.25157	0.306721	0.455632	0.210203		Predicted ORF in Assemblies 19, 20 and 21; increased transcription is observed upon benomyl treatment or in an azole-resistant strain that overexpresses MDR1; shows colony morphology-related gene regulation by Ssn6p; induced by nitric oxide, 17-beta-estradiol, ethynyl estradiol; macrophage-downregulated gene	GO:0042493 response to drug |
orf19.7042	6.21769	6.4903	2.98687	0.26691	0.328033	0.336711		Increased transcription is observed upon benomyl treatment or in an azole-resistant strain that overexpresses MDR1; induced by nitric oxide
orf19.6366	0.517822	0.362729	0.395041	0.979097	0.955133	0.924403		Predicted ORF in Assemblies 19, 20 and 21
orf19.1718	0.470276	0.427516	0.423739	1.21069	0.922681	0.844699		Predicted zinc-finger protein of unknown function; decreased transcription is observed upon fluphenazine treatment
orf19.4166	0.414869	0.395567	0.610127	1.03631	0.818273	1.03846		Predicted zinc-finger protein of unknown function
orf19.4044	0.318356	0.323166	0.479089	1.16646	0.998393	0.830263	MUM2	Protein similar to S. cerevisiae Mum2p; transcription is induced in response to alpha pheromone in SpiderM medium; transcription is regulated by Tup1p	GO:0006279 premeiotic DNA synthesis |
orf19.1604	0.437407	0.422336	0.459789	0.833328	0.940061	0.959302		Predicted ORF in Assemblies 19, 20 and 21; Gal4p-like DNA-binding domain
orf19.2849	0.11584	0.0688218	0.182034	0.622197	0.991098	0.753256	AQY1	Aquaporin water channel; mutant has increased resistance to osmotic shock; required for wild-type tolerance of freezing; not required for virulence in a mouse model of systemic infection; flucytosine repressed	GO:0006970 response to osmotic stress | GO:0050826 response to freezing | GO:0006833 water transport | GO:0030437 ascospore formation |	GO:0015250 water channel activity |	GO:0016020 membrane | GO:0005886 plasma membrane |
orf19.3146	0.513414	0.465529	0.425419	0.80959	1.09543	1.0365		Predicted ORF from Assembly 19; merged with orf19.2227 in Assembly 20
orf19.5316	0.409592	0.337776	0.390339	0.866873	1.12936	1.29	FGR29	Protein lacking an ortholog in S. cerevisiae; transposon mutation affects filamentous growth	GO:0030447 filamentous growth |
orf19.7017	0.529915	0.455887	0.494554	1.00938	1.1351	1.07407	YOX1	Predicted ORF in Assemblies 19, 20 and 21; periodic mRNA expression, peak at cell-cycle G1/S phase	GO:0000122 negative regulation of transcription from RNA polymerase II promoter | GO:0007346 regulation of mitotic cell cycle |	GO:0043565 sequence-specific DNA binding | GO:0016566 specific transcriptional repressor activity |	GO:0000790 nuclear chromatin |
orf19.5342.2	0.531245	0.383372	0.356534	0.913602	1.36586	1.35139		ORF added to Assembly 21 based on comparative genome analysis
orf19.5102	0.433669	0.306642	0.53496	0.882066	1.26206	1.09487	PLB5	Putative phospholipase B, fungal-specific (no human or murine homolog); null mutation eliminates cell-associated phospholipase A2 activity and attenuates virulence; putative GPI anchor	GO:0030384 phosphoinositide metabolic process | GO:0006644 phospholipid metabolic process |	GO:0004622 lysophospholipase activity | GO:0004623 phospholipase A2 activity |	GO:0009986 cell surface | GO:0005576 extracellular region | GO:0005886 plasma membrane |
orf19.2762	0.395681	0.233083	0.427622	1.14139	1.40088	0.858813	AHP1	Putative alkyl hydroperoxide reductase; immunogenic in mouse; biofilm-induced; fluconazole-induced; amphotericin B, caspofungin, alkaline downregulated; induced in core stress response; regulated by Ssk1p, Nrg1p, Tup1p, Ssn6p, Hog1p	GO:0010038 response to metal ion | GO:0045454 cell redox homeostasis | GO:0006979 response to oxidative stress |	GO:0008785 alkyl hydroperoxide reductase activity | GO:0008379 thioredoxin peroxidase activity |	GO:0030446 hyphal cell wall | GO:0005625 soluble fraction | GO:0001950 plasma membrane enriched fraction | GO:0005737 cytoplasm |
orf19.1522	0.575724	0.246179	0.303514	0.787396	0.784664	0.998101		Predicted ORF in Assemblies 19, 20 and 21
orf19.7218	0.782988	0.331639	0.427416	0.777315	0.779489	1.37141	RBE1	Putative cell wall protein; transcription is negatively regulated by Rim101p, Efg1p, Ssn6p; alkaline downregulated; predicted signal sequence, O-glycosylation; no GPI anchor predicted			GO:0009277 fungal-type cell wall | GO:0005635 nuclear envelope | GO:0000324 fungal-type vacuole | GO:0005576 extracellular region | GO:0005783 endoplasmic reticulum |
orf19.6536	0.686717	0.39295	0.484998	0.694341	1.12734	1.47715	IQG1	Component of actomyosin ring at bud neck; cell-cycle regulated serine phosphorylation at CDK sites regulates association with formins Bni1p and Bnr1p, Iqg1p degradation, and ring disassembly; mutation causes severe cytokinetic defects	GO:0006970 response to osmotic stress | GO:0000915 cytokinesis, contractile ring formation | GO:0032187 contractile ring localization involved in cytokinesis during cell cycle | GO:0007015 actin filament organization |	GO:0008092 cytoskeletal protein binding |	GO:0000142 cellular bud neck contractile ring |
orf19.5188	0.579529	0.297503	0.362697	0.748753	0.961375	1.36643	CHS1	Chitin synthase; essential; required for primary septum synthesis in yeast-form cells and hyphae; one of multiple chitin synthases; enzymatically activated by proteolytic processing; complements defects of S. cerevisiae chs1 or chs2 mutant	GO:0000917 barrier septum formation | GO:0006038 cell wall chitin biosynthetic process | GO:0009405 pathogenesis | GO:0000916 contractile ring contraction involved in cytokinesis during cell cycle |	GO:0004100 chitin synthase activity |	GO:0009986 cell surface | GO:0016020 membrane | GO:0030428 cell septum | GO:0005935 cellular bud neck |
orf19.95	0.474852	0.29493	0.432223	1.25108	1.3676	1.54815		Predicted ORF in Assemblies 19, 20 and 21
orf19.4255	0.689512	0.222111	0.468092	1.46106	1.15954	1.54333	ECM331	GPI-anchored protein; mainly at plasma membrane, also at cell wall; caspofungin induced; Plc1p-regulated; repressed by Rim101p, Hog1p; colony morphology-related gene regulation by Ssn6p; induced in cyr1 homozygous null mutant yeast-form cel			GO:0009986 cell surface | GO:0005886 plasma membrane | GO:0009277 fungal-type cell wall |
orf19.7482	0.395525	0.366782	0.407977	1.59589	1.62057	1.22274		Predicted ORF in Assemblies 19, 20 and 21
orf19.610	0.416963	0.458909	0.542573	1.35837	1.72295	1.19397	EFG1	Transcriptional repressor; required for white-phase cell type; hyphal growth, metabolism, cell-wall gene regulator; roles in adhesion, virulence; Cph1p and Efg1p have role in host cytokine response; bHLH; binds E-box; T206 phosphorylated	GO:0030448 hyphal growth | GO:0001410 chlamydospore formation | GO:0030447 filamentous growth | GO:0007124 pseudohyphal growth | GO:0045449 regulation of transcription | GO:0006355 regulation of transcription, DNA-dependent | GO:0009405 pathogenesis | GO:0044011 single-species biofilm formation on inanimate substrate | GO:0007155 cell adhesion | GO:0000902 cell morphogenesis | GO:0000122 negative…	GO:0003700 transcription factor activity | GO:0003677 DNA binding | GO:0016564 transcription repressor activity | GO:0043565 sequence-specific DNA binding |	GO:0005634 nucleus |
orf19.1935	0.492309	0.41574	0.462849	1.43209	1.14736	1.16465		Predicted ORF in Assemblies 19, 20 and 21; possibly spurious ORF (Annotation Working Group prediction)
orf19.5995	0.473958	0.462961	0.610106	1.34689	1.3268	1.07371	MCA1	Putative cysteine protease with similarity to S. cerevisiae Mca1p; has a role in apoptotic cell death upon H2O2 treatment; fungal-specific (no human or murine homolog); farnesol-induced	GO:0070301 cellular response to hydrogen peroxide | GO:0006915 apoptosis | GO:0042221 response to chemical stimulus |	GO:0008234 cysteine-type peptidase activity |	GO:0005634 nucleus |
orf19.3682	0.391802	0.284486	0.451011	1.50187	1.40935	0.943013	CWH8	Putative dolichyl pyrophosphate (Dol-P-P) phosphatase; ketoconazole-induced; expression is increased in a fluconazole-resistant isolate; clade-associated gene expression	GO:0008610 lipid biosynthetic process | GO:0006487 protein amino acid N-linked glycosylation |	GO:0016462 pyrophosphatase activity | GO:0047874 dolichyldiphosphatase activity |	GO:0030176 integral to endoplasmic reticulum membrane |
orf19.5635	0.341885	0.39693	0.70169	2.18322	1.9238	1.05328	PGA7	Protein described as a putative precursor of a hyphal surface antigen; putative GPI-anchor; induced by ciclopirox olamine, ketoconazole, or by Rim101p at pH 8; regulated during planktonic growth; induced during cell wall regeneration			GO:0009986 cell surface |
orf19.6983	0.482901	0.482324	0.726429	1.66715	1.42309	1.11286		Predicted ORF in Assemblies 19, 20 and 21; repressed by nitric oxide
orf19.6081	0.491737	0.461198	0.717082	1.519	1.50652	1.16899	PHR2	Glycosidase; role in cell wall structure; may act on beta-1,3-glucan prior to beta-1,6-glucan linkage; role in vaginal but not systemic virulence (low pH, not neutral); low pH, high iron, fluconazole induced; Rim101p-downregulated at pH 8	GO:0009405 pathogenesis | GO:0007047 cell wall organization | GO:0031505 fungal-type cell wall organization | GO:0030447 filamentous growth |	GO:0042123 glucanosyltransferase activity | GO:0004553 hydrolase activity, hydrolyzing O-glycosyl compounds | GO:0042124 1,3-beta-glucanosyltransferase activity |	GO:0009986 cell surface | GO:0009277 fungal-type cell wall | GO:0030446 hyphal cell wall | GO:0030445 yeast-form cell wall | GO:0001950 plasma membrane enriched fraction | GO:0045121 membrane raft | GO:0005739 mitochondrion | GO:0030134 ER to Golgi transport vesicle | GO:0005886 plasma membrane | GO:0046658 anchored to plasma membrane |
orf19.4390	0.254893	0.388241	0.561221	1.843	1.86348	1.38852		Predicted ORF in Assemblies 19, 20 and 21; transcription is repressed in response to alpha pheromone in SpiderM medium; transcriptionally activated by Mnl1p under weak acid stress
orf19.5417	0.385576	0.465913	0.634499	2.18813	1.73731	0.763162	DOT5	Alkaline downregulated	GO:0045454 cell redox homeostasis | GO:0006979 response to oxidative stress |	GO:0008379 thioredoxin peroxidase activity |	GO:0005634 nucleus |
orf19.1906	0.467886	0.464863	0.325342	1.53763	1.32496	1.08765		Predicted ORF in Assemblies 19, 20 and 21
orf19.4688	0.48814	0.359412	0.265925	1.8477	1.71786	0.802069	DAG7	Predicted ORF in Assemblies 19, 20 and 21; mutation confers hypersensitivity to toxic ergosterol analog; a-specific transcription; alpha-factor induced	GO:0042493 response to drug |
orf19.5477	0.383955	0.359535	0.224053	1.75942	1.83714	0.618633		Putative sulfite reductase; greater mRNA abundance observed in cyr1 or efg1 homozygous null mutant hyphae; merged with orf19.4099 in Assembly 20
orf19.7396	0.40011	0.3572	0.74108	0.709537	0.713843	1.19559		Predicted ORF in Assemblies 19, 20 and 21
orf19.3727	0.253098	0.284411	0.607482	0.581181	0.728758	1.16967	PHO112	Protein described as a constitutive acid phosphatase; transcription is negatively regulated by Rim101p; DTT-extractable; N-glycosylated	GO:0015888 thiamin transport |	GO:0003993 acid phosphatase activity |	GO:0030287 cell wall-bounded periplasmic space | GO:0009986 cell surface |
orf19.4664	0.161688	0.171719	0.532705	0.524002	0.896115	1.58482		Predicted ORF in Assemblies 19, 20 and 21	GO:0016573 histone acetylation | GO:0048869 cellular developmental process |	GO:0043166 H4/H2 histone acetyltransferase activity |	GO:0005634 nucleus | GO:0005737 cytoplasm |
orf19.6008	0.430727	0.328623	0.519456	0.696473	0.799624	1.19423		Predicted ORF in Assemblies 19, 20 and 21; transcription is repressed in response to alpha pheromone in SpiderM medium			GO:0005737 cytoplasm | GO:0005840 ribosome |
orf19.4679	0.37894	0.380727	0.4208	0.613073	0.982871	1.57466	AGP2	Protein described as an amino acid permease; hyphal downregulated; regulated upon white-opaque switching; induced in core caspofungin response, during cell wall regeneration, or by flucytosine; fungal-specific (no human or murine homolog)	GO:0006970 response to osmotic stress | GO:0006865 amino acid transport | GO:0006631 fatty acid metabolic process | GO:0015879 carnitine transport | GO:0015846 polyamine transport | GO:0055085 transmembrane transport |	GO:0005280 hydrogen | GO:0015226 carnitine transporter activity | GO:0015171 amino acid transmembrane transporter activity | GO:0015203 polyamine transmembrane transporter activity |	GO:0005887 integral to plasma membrane | GO:0005774 vacuolar membrane | GO:0005789 endoplasmic reticulum membrane |
orf19.3803	0.329375	0.24218	0.696203	0.425171	1.16576	1.72958	MNN22	Protein described as similar to Golgi alpha-1,2-mannosyltransferase; regulated by Tsa1p, Tsa1Bp in minimal media at 37 deg; Hog1p-induced; induced by nitric oxide; downregulated in core stress response	GO:0006486 protein amino acid glycosylation |	GO:0000026 alpha-1,2-mannosyltransferase activity |	GO:0005794 Golgi apparatus |
orf19.347	0.455791	0.382016	1.12859	0.813737	0.935267	0.887012	RSN1	Protein induced during the mating process
orf19.921	0.380616	0.475977	1.11901	0.603887	0.862726	1.22326		Predicted ORF in Assemblies 19, 20 and 21
orf19.951	0.177854	0.24415	1.28879	0.708086	1.44826	2.03119		Predicted ORF in Assemblies 19, 20 and 21; transcription downregulated upon yeast-hyphal switch; fluconazole-induced; possibly spurious ORF (Annotation Working Group prediction)
orf19.5911	0.302623	0.427649	1.04776	0.885495	0.94633	1.46268	CMK1	Expression is regulated upon white-opaque switching; biochemically purified Ca2+/CaM-dependent kinase is soluble, cytosolic, monomeric, and serine-autophosphorylated	GO:0007165 signal transduction | GO:0006468 protein amino acid phosphorylation |	GO:0004683 calmodulin-dependent protein kinase activity |	GO:0005737 cytoplasm |
orf19.5334	0.189531	0.291082	1.1532	0.695684	0.855019	2.04205		Predicted ORF in Assemblies 19, 20 and 21; transcription regulated upon yeast-hyphal switch
orf19.508	0.282107	0.563527	1.27545	0.266072	1.81321	4.23474	QDR1	Putative transporter of antibiotic resistance; transcription is regulated by Nrg1p and Tup1p; caspofungin repressed; expression is regulated upon white-opaque switching	GO:0006855 multidrug transport | GO:0015893 drug transport |	GO:0015559 multidrug efflux pump activity | GO:0015238 drug transporter activity |	GO:0005887 integral to plasma membrane | GO:0005886 plasma membrane | GO:0016020 membrane |
orf19.691	0.383652	0.556635	0.700032	0.387091	1.35552	1.5137	GPD2	Similar to glycerol 3-P dehydrogenases; regulated by Ssn6p (colony morphology-related), Nrg1p, Efg1p; induced upon osmotic and oxidative stress (via Hog1p), cell wall regeneration, macrophage/pseudohyphal growth, core stress response	GO:0006973 intracellular accumulation of glycerol |	GO:0004367 glycerol-3-phosphate dehydrogenase (NAD+) activity |	GO:0005737 cytoplasm |
orf19.3061.1	0.541148	0.482324	0.316152	0.3735	0.822148	1.33837		Predicted ORF in Assembly 20 and 21; gene has intron; similar to RPS22A/orf19.6265		GO:0003735 structural constituent of ribosome |	GO:0022627 cytosolic small ribosomal subunit |
orf19.4765	0.808584	0.423706	0.522754	0.166848	0.981858	2.51036	PGA6	Putative GPI-anchored cell-wall protein of unknown function; similar to S. cerevisiae Ccw12p/Ylr110cp; transcriptionally regulated by iron; expression greater in high iron; upregulated upon Als2p depletion			GO:0009986 cell surface | GO:0009277 fungal-type cell wall |
orf19.1051	0.789701	0.467156	0.564015	0.295083	0.577679	1.89468	HTA2	Protein described as histone H2A; farnesol regulated; transcription is downregulated in both intermediate and mature biofilms	GO:0006333 chromatin assembly or disassembly |	GO:0003677 DNA binding |	GO:0000786 nucleosome |
orf19.3048	0.459239	0.409049	0.486688	1.15885	2.08025	1.95801		Predicted ORF in Assemblies 19, 20 and 21; transcription is repressed in response to alpha pheromone in SpiderM medium
orf19.6737	0.53918	0.511307	0.666408	0.747048	2.40086	2.29469		Protein not essential for viability; greater mRNA abundance observed in a cyr1, ras1, or efg1 homozygous null mutant than in wild type; possibly spurious ORF (Annotation Working Group prediction)
orf19.668	0.607888	0.453886	0.614543	0.790727	2.08976	2.13707		Predicted ORF in Assemblies 19, 20 and 21	GO:0034984 cellular response to DNA damage stimulus |	GO:0003682 chromatin binding |	GO:0005739 mitochondrion | GO:0070210 Rpd3L-Expanded complex |
orf19.5873	0.506668	0.453379	0.594675	0.903477	2.19724	2.08224	POL1	Protein described as DNA directed DNA polymerase alpha; RNA abundance regulated by cell cycle, tyrosol and cell density	GO:0006273 lagging strand elongation | GO:0006270 DNA replication initiation | GO:0006279 premeiotic DNA synthesis | GO:0006278 RNA-dependent DNA replication | GO:0000731 DNA synthesis during DNA repair |	GO:0003887 DNA-directed DNA polymerase activity |	GO:0005739 mitochondrion | GO:0005658 alpha DNA polymerase |
orf19.1960	0.427127	0.481979	0.804142	0.95042	1.5311	1.99077	CLN3	G1 cyclin; depletion causes abolished budding and hyphal growth defects; likely to be essential; farnesol regulated, upregulated in biofilm; functional in S. cerevisiae; similar to S. cerevisiae Cln3p, which is a G1-specific cyclin	GO:0000079 regulation of cyclin-dependent protein kinase activity | GO:0000082 G1/S transition of mitotic cell cycle | GO:0030447 filamentous growth | GO:0051726 regulation of cell cycle | GO:0030448 hyphal growth | GO:0007114 cell budding | GO:0042493 response to drug | GO:0008361 regulation of cell size | GO:0042144 vacuole fusion, non-autophagic |	GO:0016538 cyclin-dependent protein kinase regulator activity |	GO:0005634 nucleus |
orf19.4212	0.829403	0.771304	1.02044	1.19152	2.87159	2.21046	FET99	Protein of multicopper oxidase family; similar to S. cerevisiae Fet3p; does not functionally complement S. cerevisiae fet3 mutant growth under low-iron conditions; iron-repressed transcription; regulated by Tup1p, Rim101p
orf19.1835	0.820471	0.739717	0.672237	1.28244	2.64542	2.19684		Predicted ORF in Assemblies 19, 20 and 21	GO:0007121 bipolar cellular bud site selection | GO:0007015 actin filament organization | GO:0007266 Rho protein signal transduction |	GO:0005519 cytoskeletal regulatory protein binding |	GO:0000133 polarisome | GO:0030478 actin cap |
orf19.1445	0.833898	0.842469	0.88486	1.26253	2.1251	2.0499	ESC4	Protein similar to S. cerevisiae Esc4p, which represses transposition; transposon mutation affects filamentous growth	GO:0030447 filamentous growth | GO:0000335 negative regulation of transposition, DNA-mediated |
orf19.4867	0.863313	0.811013	0.809325	1.25401	2.10691	2.01048	SWE1	Functional homolog of S. cerevisiae Swe1p; mutant cells are small, rounded, and sometimes binucleate; not required for filamentous growth; transcription is repressed in response to alpha pheromone in SpiderM medium	GO:0000902 cell morphogenesis | GO:0040020 regulation of meiosis | GO:0010697 negative regulation of spindle pole body separation | GO:0000079 regulation of cyclin-dependent protein kinase activity | GO:0008361 regulation of cell size | GO:0000086 G2/M transition of mitotic cell cycle | GO:0000078 cell morphogenesis checkpoint | GO:0000320 re-entry into mitotic cell cycle |	GO:0004713 protein tyrosine kinase activity | GO:0004672 protein kinase activity |	GO:0005634 nucleus | GO:0005935 cellular bud neck |
orf19.4853	0.634609	0.559216	0.687223	1.0402	3.07565	2.63734	HCM1	Protein with forkhead domain; similar to S. cerevisiae Hcm1p	GO:0006367 transcription initiation from RNA polymerase II promoter | GO:0051300 spindle pole body organization | GO:0000115 regulation of transcription involved in S-phase of mitotic cell cycle |	GO:0043565 sequence-specific DNA binding | GO:0003704 specific RNA polymerase II transcription factor activity |	GO:0000790 nuclear chromatin |
orf19.6022	1.03257	0.693102	0.607147	1.18666	2.10519	2.40994		Predicted ORF in Assemblies 19, 20 and 21; downregulated during core stress response
orf19.4459	0.505424	0.855899	1.03401	1.53473	2.47789	3.10642		Predicted ORF in Assemblies 19, 20 and 21; similar to S. cerevisiae Ynl234wp, which is a putative heme-binding stress-related protein; transposon mutation affects filamentous growth	GO:0030447 filamentous growth |
orf19.4318	0.685687	0.780775	1.22689	0.971821	2.04443	2.56851	MIG1	Transcriptional repressor; regulates genes for utilization of carbon sources; Tup1p-dependent and -independent functions; upregulated in biofilm; hyphal downregulated; caspofungin repressed; functional homolog of S. cerevisiae Mig1p	GO:0016481 negative regulation of transcription | GO:0015976 carbon utilization | GO:0006357 regulation of transcription from RNA polymerase II promoter | GO:0006006 glucose metabolic process | GO:0006355 regulation of transcription, DNA-dependent | GO:0000433 negative regulation of transcription from RNA polymerase II promoter by glucose |	GO:0016564 transcription repressor activity | GO:0003700 transcription factor activity | GO:0003690 double-stranded DNA binding | GO:0003714 transcription corepressor activity | GO:0043565 sequence-specific DNA binding | GO:0016566 specific transcriptional repressor activity |	GO:0005634 nucleus | GO:0005641 nuclear envelope lumen | GO:0005737 cytoplasm |
orf19.2385	1.16035	1.00439	0.887386	0.587674	2.41636	3.95682	KTI12	Protein similar to S. cerevisiae Kti12p, which associates with Elongator complex; has a role in resistance to killer toxin; predicted Kex2p substrate	GO:0015976 carbon utilization | GO:0016049 cell growth | GO:0006357 regulation of transcription from RNA polymerase II promoter | GO:0002098 tRNA wobble uridine modification |	GO:0030234 enzyme regulator activity | GO:0003682 chromatin binding |	GO:0016591 DNA-directed RNA polymerase II, holoenzyme | GO:0005634 nucleus | GO:0005737 cytoplasm |
orf19.6014	1.1908	0.852174	0.809459	0.531552	2.05115	2.15758	RRS1	Predicted ORF in Assemblies 19, 20 and 21; mutation confers hypersensitivity to 5-fluorocytosine (5-FC), 5-fluorouracil (5-FU), and tubercidin (7-deazaadenosine)	GO:0042493 response to drug | GO:0042254 ribosome biogenesis |		GO:0030687 preribosome, large subunit precursor | GO:0005634 nucleus |
orf19.6420	0.868982	0.513158	0.591271	0.686386	2.35807	2.86254	PGA13	Putative GPI-anchored protein; described as similar to mucins; induced during cell wall regeneration, and during core caspofungin response; regulated by Tsa1p, Tsa1Bp in minimal media at 37 deg and by Cyr1p, Nrg1p, Tup1p, Rlm1p			GO:0009986 cell surface |
orf19.2735	1.16008	0.702248	0.590183	0.642235	2.03392	2.64925	SEN2	Predicted ORF in Assemblies 19, 20 and 21; mutation confers hypersensitivity to toxic ergosterol analog, and to amphotericin B; has intron in 5'-UTR	GO:0042493 response to drug | GO:0000379 tRNA-type intron splice site recognition and cleavage |	GO:0000213 tRNA-intron endonuclease activity |	GO:0005637 nuclear inner membrane | GO:0000214 tRNA-intron endonuclease complex | GO:0005741 mitochondrial outer membrane |
orf19.6178	0.639226	1.20359	2.01119	0.769709	1.80151	2.23328	FBP1	Fructose-1,6-bisphosphatase, a key enzyme of gluconeogenesis; involved in the carbohydrate metabolism; regulated by Efg1p, Ssn6p; upregulated upon phagocytosis, effecting switch from glycolysis to gluconeogenesis in macrophage	GO:0006094 gluconeogenesis | GO:0006800 oxygen and reactive oxygen species metabolic process |	GO:0042132 fructose 1,6-bisphosphate 1-phosphatase activity |	GO:0005829 cytosol |
orf19.4492	0.323665	1.17712	1.30362	1.1655	2.17144	2.30249		Predicted ORF in Assemblies 19, 20 and 21	GO:0006364 rRNA processing | GO:0000280 nuclear division |		GO:0030687 preribosome, large subunit precursor | GO:0005730 nucleolus |
orf19.1930	0.726731	0.347675	0.462605	3.22208	1.42986	0.198769	CFL5	Protein similar to ferric reductase Fre10p; expression greater in low iron; negatively regulated by Sfu1p; ciclopirox olamine, flucytosine induced; amphotericin B repressed; transcription is positively regulated by Tbf1p	GO:0015892 siderophore-iron transport |	GO:0000293 ferric-chelate reductase activity |	GO:0005886 plasma membrane |
orf19.5645	0.77098	0.350766	0.495444	3.61714	3.29199	0.255577	MET15	O-acetylhomoserine O-acetylserine sulfhydrylase; involved in sulfur amino acid biosynthesis; immunogenic; Hog1p, biofilm, possibly adherence-induced; brown colony color of homozygous mutant in Pb(2+) medium is visual selection marker	GO:0009086 methionine biosynthetic process | GO:0042493 response to drug |	GO:0003961 O-acetylhomoserine aminocarboxypropyltransferase activity | GO:0004124 cysteine synthase activity |	GO:0030446 hyphal cell wall | GO:0005625 soluble fraction | GO:0005829 cytosol | GO:0001950 plasma membrane enriched fraction | GO:0005737 cytoplasm |
orf19.2652	0.670821	0.473475	0.396963	5.68788	2.50148	1.55569	TEF4	Putative translation elongation factor; genes encoding ribosomal subunits, translation factors, and tRNA synthetases are downregulated upon phagocytosis by murine macrophage	GO:0006414 translational elongation |	GO:0003746 translation elongation factor activity |	GO:0005840 ribosome |
orf19.1366	0.651232	0.609915	0.563231	5.58052	2.12187	1.37865		Predicted ORF in Assemblies 19, 20 and 21
orf19.6202	0.53763	0.34827	0.495807	3.69551	2.46155	1.71644	RBT4	Similar to plant pathogenesis-related proteins; required for virulence in mouse systemic, rabbit corneal infections; not required for filamentation; secretion signal; TUP1/RFG1/SSN6/HOG1 repressed; serum, hyphal, pheromone, alkaline-induced	GO:0009405 pathogenesis | GO:0042493 response to drug |		GO:0005576 extracellular region | GO:0005635 nuclear envelope | GO:0005783 endoplasmic reticulum |
orf19.889	0.534656	0.489632	0.592251	2.97796	2.43437	1.43114	THI20	Putative phosphomethylpyrimidine kinase; also described as a putative transcription factor with TENA DNA-binding motif; fungal-specific (no human or murine homolog)	GO:0006355 regulation of transcription, DNA-dependent | GO:0009230 thiamin catabolic process | GO:0009228 thiamin biosynthetic process |	GO:0008972 phosphomethylpyrimidine kinase activity | GO:0003700 transcription factor activity | GO:0008902 hydroxymethylpyrimidine kinase activity | GO:0050334 thiaminase activity |	GO:0005829 cytosol |
orf19.4099	0.693127	0.507155	0.491818	2.27543	2.04908	0.903748	ECM17	Predicted enzyme of sulfur amino acid biosynthesis; putative role in regulation of cell wall biogenesis; upregulated in biofilm; possibly adherence-induced; regulated by Tsa1p, Tsa1Bp under H2O2 stress; Gcn4p-regulated; Tbf1p-activated	GO:0000103 sulfate assimilation | GO:0042493 response to drug | GO:0007047 cell wall organization |	GO:0004783 sulfite reductase (NADPH) activity |	GO:0005737 cytoplasm | GO:0009337 sulfite reductase complex (NADPH) |
orf19.6124	0.402148	0.294031	0.409442	4.97249	1.25236	0.977654	ACE2	Putative transcription factor involved in regulation of morphogenesis; required for wild-type cell separation, adherence, biofilm formation, and virulence in mouse; mutant is hyperfilamentous; similar to S. cerevisiae Ace2p and Swi5p	GO:0045944 positive regulation of transcription from RNA polymerase II promoter | GO:0009405 pathogenesis | GO:0030447 filamentous growth | GO:0007047 cell wall organization | GO:0042710 biofilm formation | GO:0000114 regulation of transcription involved in G1 phase of mitotic cell cycle |	GO:0016563 transcription activator activity | GO:0043565 sequence-specific DNA binding |	GO:0005634 nucleus | GO:0005829 cytosol |
orf19.3940.1	0.983166	0.197186	0.230055	2.54721	3.13743	1.71543	CUP1	Metallothionein, involved in copper resistance; transcription is induced by copper	GO:0006878 cellular copper ion homeostasis |	GO:0005507 copper ion binding |
orf19.4654	0.810458	0.881217	0.77129	9.41709	2.45292	0.766485		Predicted ORF in Assemblies 19, 20 and 21
orf19.3425	0.91437	0.942064	0.917868	5.07262	2.22099	0.965606		Predicted ORF in Assemblies 19, 20 and 21
orf19.6595	0.770659	0.912868	0.90496	4.42338	2.30208	0.688213	RTA4	Predicted ORF in Assemblies 19, 20 and 21; similar to S. cerevisiae Yor049cp, which is involved in fatty acid transport; transposon mutation affects filamentous growth; alkaline downregulated; caspofungin induced	GO:0030447 filamentous growth | GO:0015908 fatty acid transport |	GO:0004012 phospholipid-translocating ATPase activity |	GO:0005886 plasma membrane | GO:0016021 integral to membrane | GO:0005783 endoplasmic reticulum |
orf19.3263	1.33068	1.41817	1.11166	9.07164	2.79149	0.704848		Predicted ORF in Assemblies 19, 20 and 21	GO:0007126 meiosis | GO:0006259 DNA metabolic process |
orf19.338	1.06843	0.587567	0.691779	2.36574	2.04176	0.743328		Predicted ORF in Assemblies 19, 20 and 21; Hog1p-downregulated; shows colony morphology-related gene regulation by Ssn6p; protein detected by mass spec in stationary phase cultures			GO:0005737 cytoplasm |
orf19.7350	1.12832	0.691655	0.637159	2.75717	2.0013	0.768905		Soluble protein in hyphae; fluconazole-induced; mRNA abundance is elevated in a cyr1 or ras1 null mutant and decreased mRNA abundance in an efg1 null mutant; regulated by Nrg1p, Tup1p, Tbf1p, Ssn6p			GO:0005625 soluble fraction | GO:0005739 mitochondrion | GO:0005840 ribosome |
orf19.3388	1.13675	0.705251	0.654773	5.32758	7.92108	3.64208		Predicted ORF from Assembly 19; removed from Assembly 20
orf19.5180	1.20008	0.868345	0.830636	2.42913	2.58387	1.88529	PRX1	Protein described as a putative cysteine peroxidase; transcriptionally induced by interaction with macrophage; fluconazole induced; Fkh2p-downregulated; caspofungin repressed	GO:0046686 response to cadmium ion | GO:0045454 cell redox homeostasis | GO:0006979 response to oxidative stress |	GO:0008379 thioredoxin peroxidase activity |	GO:0005739 mitochondrion |
orf19.4945	1.00685	0.859478	1.00885	2.36763	2.76768	2.32507	MSH6	Protein similar to S. cerevisiae Msh6p, which is involved in mismatch repair; repressed under Cdc5p depletion	GO:0000710 meiotic mismatch repair |	GO:0032138 single base insertion or deletion binding | GO:0032137 guanine/thymine mispair binding | GO:0016887 ATPase activity | GO:0000400 four-way junction DNA binding | GO:0005524 ATP binding |	GO:0032301 MutSalpha complex |
orf19.3548.1	0.86885	0.651418	0.821094	3.84937	7.95547	4.10956	WH11	Cytoplasmic protein expressed specifically in white phase yeast-form cells; expression in opaque cells increases virulence and frequency of opaque-to-white switching; null mutant shows wild-type switching; similar to S. cerevisiae Hsp12p	GO:0009405 pathogenesis |		GO:0005737 cytoplasm | GO:0005886 plasma membrane | GO:0005634 nucleus | GO:0016023 cytoplasmic membrane-bounded vesicle |
orf19.7041	1.07463	0.973891	0.918056	2.20691	2.03986	2.02937		Putative protein of unknown function; heterozygous null mutant exhibits hypersensitivity to parnafungin and cordycepin in the C. albicans fitness test; predicted ORF in Assemblies 19, 20 and 21	GO:0008033 tRNA processing | GO:0006379 mRNA cleavage | GO:0006378 mRNA polyadenylation | GO:0030847 termination of RNA polymerase II transcription, poly(A)-independent | GO:0030846 termination of RNA polymerase II transcription, poly(A)-coupled | GO:0042493 response to drug |		GO:0005847 mRNA cleavage and polyadenylation specificity factor complex |
orf19.3353	0.960686	0.790214	1.05931	2.39215	2.26084	2.64908		Protein described as similar to a mitochondrial complex I intermediate-associated protein; fluconazole-downregulated
orf19.2713	1.33801	0.943674	0.951914	1.8185	2.41535	2.08084		Predicted ORF in Assemblies 19, 20 and 21	GO:0006281 DNA repair | GO:0007131 reciprocal meiotic recombination |		GO:0005634 nucleus |
orf19.5166	1.34393	1.13558	0.901262	1.98066	3.0987	3.00929	DBF4	Predicted ORF in Assemblies 19, 20 and 21; macrophage/pseudohyphal-repressed; cell-cycle regulated periodic mRNA expression; S. cerevisiae ortholog is not cell-cycle regulated	GO:0006275 regulation of DNA replication | GO:0006468 protein amino acid phosphorylation | GO:0045860 positive regulation of protein kinase activity | GO:0006270 DNA replication initiation |	GO:0004674 protein serine/threonine kinase activity | GO:0043539 protein serine/threonine kinase activator activity | GO:0003688 DNA replication origin binding |	GO:0005654 nucleoplasm | GO:0031431 Dbf4-dependent protein kinase complex |
orf19.1437	1.23641	1.07379	0.980214	1.80144	2.17599	2.64183		Transcription is negatively regulated by Sfu1p; removed from Assembly 20
orf19.6747	0.999137	1.02529	1.09023	1.57929	2.15312	2.44195		Predicted ORF in Assemblies 19, 20 and 21	GO:0032366 intracellular sterol transport |		GO:0005634 nucleus | GO:0005737 cytoplasm |
orf19.1618	0.916996	1.01808	0.950895	1.97273	2.79716	2.53939	GFA1	Glucosamine-6-phosphate synthase; enzyme of chitin/hexosamine biosynthesis; homotetrameric; inhibited by UDP-GlcNAc, FMDP, N-acyl peptide, kanosamine-6-P; functional homolog of S. cerevisiae Gfa1p; growth-phase regulated; catalytic Cys	GO:0042493 response to drug | GO:0006487 protein amino acid N-linked glycosylation | GO:0006042 glucosamine biosynthetic process | GO:0006031 chitin biosynthetic process | GO:0006038 cell wall chitin biosynthetic process | GO:0030448 hyphal growth |	GO:0004360 glutamine-fructose-6-phosphate transaminase (isomerizing) activity |
orf19.7314	1.21399	1.20032	1.534	3.40741	3.89051	6.31002	CDG1	Protein described as similar to cysteine dioxygenases; expression is regulated upon white-opaque switching; transcription is upregulated in both intermediate and mature biofilms
orf19.2885	1.0452	0.779938	0.950889	1.60583	2.12421	2.52217	PRI2	Gene adjacent to CDC68; divergently transcribed with CDC68	GO:0006273 lagging strand elongation | GO:0006270 DNA replication initiation | GO:0000731 DNA synthesis during DNA repair | GO:0006269 DNA replication, synthesis of RNA primer |	GO:0003896 DNA primase activity |	GO:0005635 nuclear envelope | GO:0005658 alpha DNA polymerase |
orf19.4004	1.61362	1.24216	0.808423	3.03472	2.48438	1.76541	CCT3	Predicted ORF in Assemblies 19, 20 and 21; mutation confers hypersensitivity to cytochalasin D	GO:0006457 protein folding | GO:0007010 cytoskeleton organization | GO:0006461 protein complex assembly | GO:0042493 response to drug |	GO:0051082 unfolded protein binding |	GO:0005856 cytoskeleton | GO:0005832 chaperonin-containing T-complex |
orf19.5431	1.29778	1.05682	0.743781	3.38455	2.74037	1.87087		Predicted ORF in Assemblies 19, 20 and 21
orf19.302	1.15941	1.1188	0.761635	2.16686	2.0458	1.26254		Predicted ORF in Assemblies 19, 20 and 21	GO:0006888 ER to Golgi vesicle-mediated transport |	GO:0017112 Rab guanyl-nucleotide exchange factor activity |	GO:0030008 TRAPP complex |
orf19.171	1.19225	0.852427	0.63192	2.21284	2.58379	1.52098	DBP2	Predicted ORF in Assemblies 19, 20 and 21; flucytosine induced; downregulated in core stress response	GO:0006364 rRNA processing | GO:0000184 nuclear-transcribed mRNA catabolic process, nonsense-mediated decay |	GO:0003724 RNA helicase activity |	GO:0005935 cellular bud neck | GO:0005739 mitochondrion | GO:0005634 nucleus |
orf19.3863	1.07389	0.90262	1.02552	3.25308	2.31451	1.20281		Predicted ORF in Assemblies 19, 20 and 21
orf19.31	1.03894	0.817928	0.983251	2.35255	2.19825	1.21801		Predicted ORF in Assemblies 19, 20 and 21	GO:0007047 cell wall organization |	GO:0005199 structural constituent of cell wall |	GO:0005886 plasma membrane | GO:0005783 endoplasmic reticulum | GO:0005618 cell wall | GO:0005934 cellular bud tip |
orf19.4072	0.930966	1.0552	1.0019	2.36965	2.00497	0.930034	IFF6	Putative GPI-anchored protein of unknown function; opaque-specific transcription; macrophage-induced gene			GO:0009986 cell surface |
orf19.4246	0.827877	1.08156	1.13954	4.40977	3.15155	1.12075		Predicted ORF in Assemblies 19, 20 and 21; similar to S. cerevisiae Ykr070wp; transposon mutation affects filamentous growth; Hog1p-downregulated; shows colony morphology-related gene regulation by Ssn6p; induced during cell wall regeneration	GO:0030447 filamentous growth |
orf19.7558	0.723528	0.772792	0.667248	4.16504	3.43764	1.04047	YTA6	Protein similar to S. cerevisiae Yta6p ATPase; transposon mutation affects filamentous growth; transcriptionally activated by Mnl1p under weak acid stress	GO:0030447 filamentous growth |		GO:0005737 cytoplasm |
orf19.1339	0.796484	0.934283	0.841236	2.68922	2.30913	1.16013	CPY1	Carboxypeptidase Y; transcriptionally regulated at yeast-hyphal transition or macrophage response; upregulated in the presence of human neutrophils; regulated by Gcn2p and Gcn4p; putative N-glycosylation	GO:0007039 vacuolar protein catabolic process | GO:0046938 phytochelatin biosynthetic process |	GO:0004180 carboxypeptidase activity | GO:0004185 serine-type carboxypeptidase activity |	GO:0000324 fungal-type vacuole | GO:0005783 endoplasmic reticulum |
orf19.7310	0.662104	0.625205	0.81464	4.04737	4.11846	1.04339		Protein similar to S. cerevisiae Gin3p; transcription is upregulated in response to treatment with ciclopirox olamine; positively regulated by Sfu1p; Hog1p, fluconazole-downregulated	GO:0007131 reciprocal meiotic recombination |		GO:0001950 plasma membrane enriched fraction | GO:0005739 mitochondrion | GO:0005783 endoplasmic reticulum |
orf19.5311	0.894625	1.04082	1.2175	2.09235	2.00858	1.16262		Predicted ORF in Assemblies 19, 20 and 21
orf19.2769	0.708833	1.14439	1.20124	3.13614	3.08059	1.30893		Predicted ORF in Assemblies 19, 20 and 21; hyphal-induced expression; greater mRNA abundance observed in a cyr1 or ras1 homozygous null mutant than in wild type	GO:0030162 regulation of proteolysis | GO:0042144 vacuole fusion, non-autophagic |	GO:0004866 endopeptidase inhibitor activity |	GO:0000324 fungal-type vacuole |
orf19.1153	0.838867	1.1737	1.32162	2.29902	2.92583	1.29363	GAD1	Protein described as glutamate decarboxylase; macrophage-downregulated gene; alkaline downregulated; amphotericin B induced; transcriptionally activated by Mnl1p under weak acid stress	GO:0006538 glutamate catabolic process | GO:0006979 response to oxidative stress |	GO:0004351 glutamate decarboxylase activity |	GO:0005737 cytoplasm |
orf19.5514	0.729096	1.62302	0.999289	3.48714	2.9668	1.14869		Predicted ORF in Assemblies 19, 20 and 21
orf19.5474	1.01584	1.17211	0.849467	2.96426	2.833	1.35019		Predicted ORF in Assemblies 19, 20 and 21; possibly spurious ORF (Annotation Working Group prediction); transcriptionally activated by Mnl1p under weak acid stress
orf19.3319	0.930662	1.18028	0.911657	2.16551	2.41883	1.10648		Predicted ORF in Assemblies 19, 20 and 21	GO:0006970 response to osmotic stress | GO:0006261 DNA-dependent DNA replication |		GO:0000324 fungal-type vacuole | GO:0005829 cytosol |
orf19.5140	0.631559	0.743672	1.27333	6.336	6.65063	2.39024		Predicted ORF in Assemblies 19, 20 and 21
orf19.6196	0.764936	0.899266	1.13749	2.44473	2.09791	1.39154		Predicted ORF in Assemblies 19, 20 and 21; possibly spurious ORF (Annotation Working Group prediction)
orf19.727	0.940907	0.878909	0.985328	2.08946	2.48439	1.52724		Predicted ORF in Assemblies 19, 20 and 21; member of a family encoded by FGR6-related genes in the RB2 repeat sequence; possibly spurious ORF (Annotation Working Group prediction)
orf19.3490	0.804454	0.862916	1.08781	2.14874	2.49124	1.72596	FGR6-4	Protein lacking an ortholog in S. cerevisiae; member of a family encoded by FGR6-related genes in the RB2 repeat sequence; transposon mutation affects filamentous growth	GO:0030447 filamentous growth |
orf19.36.1	1.04408	0.765991	1.35533	3.71347	2.85091	2.1445		ORF added to Assembly 21 based on comparative genome analysis
orf19.4712	0.975626	0.859763	1.15944	2.20559	2.07241	1.34466	FGR6-3	Protein lacking an ortholog in S. cerevisiae; member of a family encoded by FGR6-related genes in the RB2 repeat sequence; transposon mutation affects filamentous growth	GO:0030447 filamentous growth |
orf19.6021	0.547915	0.740726	1.01133	2.09129	2.55797	1.76355	IHD2	Transcriptionally regulated by iron and by yeast-hyphal switching; expression greater in low iron
orf19.682	0.665604	0.743149	1.04496	2.18906	2.35167	1.47062		Predicted ORF from Assembly 19; ketoconazole-induced; fluconazole-downregulated; induced in a cyr1 homozygous null mutant; shows colony morphology-related gene regulation by Ssn6p; merged with orf19.2296 in Assembly 20
orf19.3932.1	1.09758	1.00809	0.901949	2.20351	3.88708	1.17297		ORF added to Assembly 21 based on comparative genome analysis
orf19.7301	0.888762	0.977123	0.993837	2.13479	2.35119	1.26381		Predicted ORF in Assemblies 19, 20 and 21
orf19.3160	0.961131	0.85647	1.02803	2.4721	3.13561	1.29232	HSP12	Heat-shock protein; induced upon osmotic/oxidative/cadmium stress, fluphenazine treatment, low iron, CDR1 and CDR2 overexpression, or ssn6 or ssk1 homozygous null mutation; repressed by Hog1p, flucytosine, elevated CO2	GO:0006950 response to stress | GO:0042026 protein refolding | GO:0006979 response to oxidative stress | GO:0009408 response to heat | GO:0006972 hyperosmotic response | GO:0007155 cell adhesion |
orf19.4216	0.898171	0.789372	0.949592	2.12726	2.93497	1.18653		Predicted ORF in Assemblies 19, 20 and 21; decreased expression in hyphae compared to yeast-form cells; transcription is increased in populations of cells exposed to fluconazole over multiple generations	GO:0042026 protein refolding | GO:0006979 response to oxidative stress | GO:0009408 response to heat | GO:0006972 hyperosmotic response | GO:0007155 cell adhesion |		GO:0001950 plasma membrane enriched fraction | GO:0005634 nucleus | GO:0005737 cytoplasm | GO:0005886 plasma membrane |
orf19.5315	0.783399	0.713927	0.928424	2.03829	3.69396	1.25529	FGR6	Protein lacking an ortholog in S. cerevisiae; transposon mutation affects filamentous growth; removed from Assembly 20
orf19.4082	0.554927	0.348837	0.868442	6.63623	10.3267	1.74161	DDR48	Immunogenic stress-associated protein; regulated by filamentous growth pathways; induced by benomyl, caspofungin, or in azole-resistant strain; Hog1p, farnesol, alkaline downregulated; similar to S. cerevisiae Ddr48p	GO:0006950 response to stress | GO:0030448 hyphal growth | GO:0006979 response to oxidative stress |		GO:0030446 hyphal cell wall |
orf19.4551	1.46629	2.51952	5.13087	2.52415	5.20731	3.36827	CTN1	Predicted carnitine acetyl transferase; required for growth on nonfermentable carbon sources but not for hyphal growth or virulence in mouse systemic model; transcription induced in macrophage; macrophage/pseudohyphal-repressed after 16 hr	GO:0006084 acetyl-CoA metabolic process | GO:0045333 cellular respiration | GO:0009437 carnitine metabolic process | GO:0006066 alcohol metabolic process |	GO:0004092 carnitine O-acetyltransferase activity |	GO:0005741 mitochondrial outer membrane |
orf19.4602	1.62372	1.79262	2.32235	1.98715	2.62186	1.87687	MDH1-1	Predicted malate dehydrogenase; macrophage-induced protein	GO:0006108 malate metabolic process | GO:0001302 replicative cell aging | GO:0001300 chronological cell aging | GO:0006099 tricarboxylic acid cycle |	GO:0004470 malic enzyme activity | GO:0030060 L-malate dehydrogenase activity |	GO:0005759 mitochondrial matrix |
orf19.4450	1.95297	2.28802	3.61737	2.44173	2.78303	3.52877		Predicted zinc-finger protein of unknown function		GO:0043565 sequence-specific DNA binding |
orf19.272	2.01524	2.3115	3.19556	1.75173	2.50567	2.9356	FAA21	Predicted acyl CoA synthetase; upregulated upon phagocytosis; transcription is regulated by Nrg1p and Mig1p	GO:0006629 lipid metabolic process | GO:0006499 N-terminal protein myristoylation |	GO:0004467 long-chain-fatty-acid-CoA ligase activity |	GO:0005739 mitochondrion | GO:0005777 peroxisome |
orf19.6165	1.89895	2.41449	2.67645	1.74218	2.62094	2.53844	KGD1	Protein described as 2-oxoglutarate dehydrogenase; regulated by Efg1p under yeast-form but not hyphal growth conditions; transcription is upregulated in an RHE model of oral candidiasis; detected by mass spec in stationary phase cultures	GO:0006099 tricarboxylic acid cycle | GO:0006103 2-oxoglutarate metabolic process |	GO:0004591 oxoglutarate dehydrogenase (succinyl-transferring) activity |	GO:0042645 mitochondrial nucleoid | GO:0009353 mitochondrial oxoglutarate dehydrogenase complex |
orf19.670.2	1.46834	4.1524	7.92256	2.65558	5.25813	9.35083		ORF Predicted by Annotation Working Group
orf19.944	1.13954	2.93719	3.29711	1.93945	2.85486	2.88938	IFG3	Putative D-amino acid oxidase
orf19.3733	1.59776	2.39064	3.81963	2.95976	4.13	4.32741	IDP2	Putative isocitrate dehydrogenase; expression is regulated upon white-opaque switching; shows colony morphology-related gene regulation by Ssn6p; protein detected by mass spec in exponential and stationary phase cultures	GO:0006537 glutamate biosynthetic process | GO:0006102 isocitrate metabolic process |	GO:0004450 isocitrate dehydrogenase (NADP+) activity |	GO:0005829 cytosol |
orf19.5118	1.1422	1.66575	2.11534	1.84935	2.15285	2.3773	SDS24	Protein described as similar to S. cerevisiae Ybr214wp; transcription regulated by Mig1p and Tup1p; fluconazole-induced	GO:0007126 meiosis | GO:0006259 DNA metabolic process | GO:0006897 endocytosis | GO:0000920 cell separation during cytokinesis |		GO:0005737 cytoplasm |
orf19.5022	1.29423	1.79553	2.12138	1.8136	2.52866	3.06711		Predicted ORF in Assemblies 19, 20 and 21	GO:0006828 manganese ion transport |	GO:0005384 manganese ion transmembrane transporter activity |	GO:0000324 fungal-type vacuole | GO:0005886 plasma membrane | GO:0005739 mitochondrion | GO:0016023 cytoplasmic membrane-bounded vesicle |
orf19.3518	1.37309	2.72535	2.05268	1.44007	1.87317	1.80959		Predicted ORF in Assemblies 19, 20 and 21	GO:0006839 mitochondrial transport |	GO:0005310 dicarboxylic acid transmembrane transporter activity |	GO:0005743 mitochondrial inner membrane |
orf19.1375	1.1519	2.12572	1.60816	1.60803	2.07356	1.50848	LEU42	Putative alpha-isopropylmalate synthase; fungal-specific (no human/murine homolog); upregulated in the presence of human blood or polymorphonuclear cells; regulated by Gcn2p and Gcn4p; detected by mass spec in stationary phase cultures	GO:0009098 leucine biosynthetic process |	GO:0003852 2-isopropylmalate synthase activity |	GO:0005739 mitochondrion |
orf19.802	0.759964	1.50351	2.35181	1.76322	2.3562	2.26124	UGA1	Protein described as GABA transaminase; transcription regulated by Mig1p and Tup1p; protein detected by mass spec in stationary phase cultures	GO:0019740 nitrogen utilization | GO:0009450 gamma-aminobutyric acid catabolic process |	GO:0003867 4-aminobutyrate transaminase activity |
orf19.7359	1.71236	1.71227	2.35853	2.26751	1.23025	1.47487	CRZ1	Putative transcription factor; similar to S. cerevisiae calcineurin-regulated transcription factor Crz1p; mutant is fluconazole hypersensitive; likely to act downstream of calcineurin; has C2H2 zinc fingers; not required for mouse virulence	GO:0019722 calcium-mediated signaling | GO:0042493 response to drug | GO:0006355 regulation of transcription, DNA-dependent | GO:0010447 response to acidity | GO:0030448 hyphal growth | GO:0009612 response to mechanical stimulus |	GO:0003700 transcription factor activity |	GO:0005737 cytoplasm | GO:0005634 nucleus |
orf19.5619	1.29964	1.84093	3.04833	2.03453	1.71308	1.57963		Predicted ORF in Assemblies 19, 20 and 21; transcription is induced in response to alpha pheromone in SpiderM medium
orf19.5626	1.47278	1.85108	3.06785	1.56155	1.31249	2.07823		Predicted ORF in Assemblies 19, 20 and 21; Plc1p-regulated; transcriptionally activated by Mnl1p under weak acid stress
orf19.857	2.04882	1.77666	1.79129	1.46348	2.77401	1.7062	FMO2	Predicted ORF in Assemblies 19, 20 and 21; expression regulated during planktonic growth
orf19.3335	2.4553	2.03033	1.64075	2.12881	3.75271	2.75823		Predicted ORF in Assemblies 19, 20 and 21; shows colony morphology-related gene regulation by Ssn6p; repressed by nitric oxide			GO:0005886 plasma membrane |
orf19.6114	1.84471	1.99504	1.78594	1.75066	2.74251	2.13176		Predicted ORF in Assemblies 19, 20 and 21
orf19.5806	2.7403	1.70661	1.38242	1.34151	3.10764	1.62386	ALD5	Protein described as an aldehyde dehydrogenase; decreased expression in fluconazole-resistant isolate, or in hyphae; biofilm induced;fluconazole-downregulated; protein abundance is affected by URA3 expression in the CAI-4 strain background	GO:0019413 acetate biosynthetic process |	GO:0004028 3-chloroallyl aldehyde dehydrogenase activity | GO:0004030 aldehyde dehydrogenase [NAD(P)+] activity |	GO:0005625 soluble fraction | GO:0005739 mitochondrion |
orf19.6311	11.1144	9.81786	1.74429	6.54072	7.75994	3.01133		Predicted ORF in Assemblies 19, 20 and 21
orf19.3428	2.52004	1.94413	1.28101	2.50161	2.14798	1.52271		Predicted ORF in Assemblies 19, 20 and 21	GO:0006338 chromatin remodeling |	GO:0016887 ATPase activity | GO:0003677 DNA binding | GO:0031491 nucleosome binding | GO:0005515 protein binding |	GO:0016587 ISW1 complex |
orf19.1847	14.7073	8.02694	4.58071	8.55074	8.80002	2.73737	ARO10	Aromatic decarboxylase of the Ehrlich fusel oil pathway of aromatic alcohol biosynthesis; pH-regulated (alkaline downregulated); protein abundance is affected by URA3 expression in the CAI-4 strain background	GO:0000949 aromatic amino acid family catabolic process to alcohol via Ehrlich pathway | GO:0000951 methionine catabolic process to 3-methylthiopropanol | GO:0000950 branched chain family amino acid catabolic process to alcohol via Ehrlich pathway | GO:0006569 tryptophan catabolic process | GO:0006552 leucine catabolic process | GO:0006559 L-phenylalanine catabolic process |	GO:0016831 carboxy-lyase activity | GO:0050177 phenylpyruvate decarboxylase activity |	GO:0005737 cytoplasm |
orf19.6100	2.36735	1.8406	1.53023	2.0112	2.24606	1.7076		Protein not essential for viability; similar to S. cerevisiae Crd1p, which is cardiolipin synthase; transcription is upregulated in clinical isolates from HIV+ patients with oral candidiasis	GO:0006873 cellular ion homeostasis | GO:0008610 lipid biosynthetic process | GO:0007006 mitochondrial membrane organization |	GO:0043337 CDP-diacylglycerol-phosphatidylglycerol phosphatidyltransferase activity | GO:0008808 cardiolipin synthase activity |	GO:0005740 mitochondrial envelope |
orf19.1397	2.43396	2.50533	1.63241	1.97558	2.07752	1.68198		Predicted ORF in Assemblies 19, 20 and 21	GO:0016126 sterol biosynthetic process |	GO:0009055 electron carrier activity |	GO:0005792 microsome |
orf19.5097	2.83557	2.98527	1.98818	1.97705	2.37113	1.91194	CAT8	Predicted zinc-cluster protein; null mutant shows a defect in transcription of JEN1 lactate permease gene; flucytosine repressed; similar to S. cerevisiae Cat8p but mutant phenotype suggests that it has a different set of target genes	GO:0045944 positive regulation of transcription from RNA polymerase II promoter | GO:0006094 gluconeogenesis | GO:0045722 positive regulation of gluconeogenesis |	GO:0003700 transcription factor activity | GO:0043565 sequence-specific DNA binding | GO:0003704 specific RNA polymerase II transcription factor activity |
orf19.5877	9.40573	11.6107	6.10828	5.10705	6.11377	3.55257	ATF1	Putative alcohol acetyltransferase; caspofungin repressed; expression depends on Tac1p	GO:0006113 fermentation |	GO:0004026 alcohol O-acetyltransferase activity |
orf19.1341	2.42388	2.15837	1.42075	1.72044	1.7064	1.35004	PRR2	Predicted ORF in Assemblies 19, 20 and 21; mutation confers resistance to 5-fluorocytosine (5-FC)	GO:0000165 MAPKKK cascade | GO:0042493 response to drug |	GO:0004702 receptor signaling protein serine/threonine kinase activity |
orf19.3365	1.78638	2.13983	1.42803	1.83597	2.22714	1.58319	DAO2	Putative D-amino acid oxidase
orf19.4718	1.9096	2.72369	1.65606	1.80905	2.21309	1.60091	TRP5	Predicted tryptophan synthase; Gcn4p-regulated; upregulated in biofilm; identified in detergent-resistant membrane fraction (possible lipid raft component); predicted N-terminal acetylation; S. cerevisiae ortholog is Gcn4p regulated	GO:0000162 tryptophan biosynthetic process |	GO:0004834 tryptophan synthase activity |	GO:0005624 membrane fraction | GO:0005634 nucleus | GO:0005737 cytoplasm |
orf19.6413	3.1935	3.50792	2.5431	3.82534	3.00118	2.64076		Predicted ORF in Assemblies 19, 20 and 21; possibly spurious ORF (Annotation Working Group prediction)
orf19.6235	2.11431	1.86708	1.77208	2.37982	2.11695	1.91258		Predicted ORF in Assemblies 19, 20 and 21
orf19.6726	2.08784	2.11096	1.71369	2.6666	2.01277	2.11612		Predicted ORF in Assemblies 19, 20 and 21	GO:0043631 RNA polyadenylation | GO:0045816 negative regulation of transcription from RNA polymerase II promoter, global | GO:0006368 RNA elongation from RNA polymerase II promoter | GO:0006325 chromatin organization |	GO:0000217 DNA secondary structure binding |	GO:0005634 nucleus |
orf19.3142	2.17498	2.55453	1.74236	1.89856	1.97018	2.04161		Predicted ORF in Assemblies 19, 20 and 21
orf19.4513	2.45174	2.95152	2.01341	2.41552	2.21038	2.26052		Protein not essential for viability; possibly spurious ORF (Annotation Working Group prediction)
orf19.6985	2.08488	2.1675	1.59419	2.1307	1.74896	2.11396	TEA1	Putative transcription factor with zinc cluster DNA-binding motif; has similarity to S. cerevisiae Tea1p	GO:0006355 regulation of transcription, DNA-dependent | GO:0006350 transcription |	GO:0003700 transcription factor activity | GO:0043565 sequence-specific DNA binding |	GO:0005634 nucleus |
orf19.4105	2.1203	1.9389	2.13937	1.60881	2.0469	2.14143		Predicted ORF in Assemblies 19, 20 and 21	GO:0045132 meiotic chromosome segregation |
orf19.4396	2.48105	2.12206	2.10986	2.03566	2.71211	2.41654		Predicted ORF in Assemblies 19, 20 and 21	GO:0042407 cristae formation |		GO:0030061 mitochondrial crista | GO:0005886 plasma membrane |
orf19.6066	3.283	2.99012	2.92842	3.04332	3.28847	2.69796		Predicted ORF in Assemblies 19, 20 and 21			GO:0005811 lipid particle | GO:0005768 endosome | GO:0031307 integral to mitochondrial outer membrane |
orf19.6062.3	2.3479	2.21335	2.15623	2.08648	1.97588	1.96142		ORF Predicted by Annotation Working Group			GO:0005739 mitochondrion |
orf19.1584	1.92463	1.99737	1.37458	1.81365	2.20221	2.07715		Predicted membrane transporter, member of the monocarboxylate porter (MCP) family, major facilitator superfamily (MFS); shows colony morphology-related gene regulation by Ssn6p	GO:0015718 monocarboxylic acid transport |	GO:0008028 monocarboxylic acid transmembrane transporter activity |	GO:0016020 membrane |
orf19.7370	2.92731	3.08615	1.53728	3.17559	2.85444	2.44599		Member of family of putative 7-transmembrane, PQ loop-family of G-protein-coupled receptors (GPCRs) similar to S. pombe Stm1p			GO:0000329 fungal-type vacuole membrane |
orf19.1673	1.99768	1.79709	1.36617	2.40927	2.22707	2.17445	PPT1	Protein described as serine/threonine phosphatase; transcriptionally regulated by iron; expression greater in high iron	GO:0006468 protein amino acid phosphorylation | GO:0006470 protein amino acid dephosphorylation |	GO:0004722 protein serine/threonine phosphatase activity |	GO:0005634 nucleus | GO:0005737 cytoplasm |
orf19.5012	2.38597	2.10657	1.87685	1.24977	1.4068	1.55495		Predicted ORF in Assemblies 19, 20 and 21; possibly spurious ORF (Annotation Working Group prediction)
orf19.3611	2.44619	2.07152	1.86328	1.17006	1.3592	1.95418		Predicted ORF in Assemblies 19, 20 and 21; repressed by nitric oxide
orf19.345	2.47738	2.25495	2.00346	1.67763	1.5615	1.82976		Predicted ORF in Assemblies 19, 20 and 21	GO:0006540 glutamate decarboxylation to succinate | GO:0009450 gamma-aminobutyric acid catabolic process | GO:0006979 response to oxidative stress |	GO:0009013 succinate-semialdehyde dehydrogenase [NAD(P)+] activity |	GO:0005737 cytoplasm |
orf19.361	2.70495	3.82435	5.00575	1.70738	3.0863	2.12387		Predicted ORF from Assembly 19; merged with orf19.4551 in Assembly 20
orf19.6724.1	2.63287	3.41326	3.6889	1.92978	2.60448	2.52552		ORF Predicted by Annotation Working Group; merged with orf19.6724 in Assembly 20
orf19.1701	3.66582	4.08245	2.98959	1.38084	2.09024	2.84815	RKI1	Predicted ORF in Assemblies 19, 20 and 21	GO:0008615 pyridoxine biosynthetic process | GO:0006098 pentose-phosphate shunt |	GO:0004751 ribose-5-phosphate isomerase activity |	GO:0005634 nucleus | GO:0005737 cytoplasm |
orf19.1517	7.06718	7.63479	5.92842	1.54385	3.61985	4.50621	ARO3	3-Deoxy-D-arabinoheptulosonate-7-phosphate synthase; enzyme of aromatic amino acid biosynthesis; GCN-regulated; feedback-inhibited by phenylalanine when heterologously produced in S. cerevisiae; Aro3p and Aro4p catalyze the same reaction	GO:0009073 aromatic amino acid family biosynthetic process |	GO:0003849 3-deoxy-7-phosphoheptulonate synthase activity |	GO:0005739 mitochondrion | GO:0005634 nucleus |
orf19.5639	2.03117	2.30973	2.06524	1.2228	1.70451	1.74052	HIS4	Multifunctional enzyme that catalyzes three steps of histidine biosynthesis, with phosphoribosyl-AMP cyclohydrolase, phosphoribosyl-ATP diphosphatase, and histidinol dehydrogenase activities; required for wild-type adhesion to human calls	GO:0000105 histidine biosynthetic process | GO:0044406 adhesion to host | GO:0007155 cell adhesion |	GO:0004399 histidinol dehydrogenase activity | GO:0004636 phosphoribosyl-ATP diphosphatase activity | GO:0004635 phosphoribosyl-AMP cyclohydrolase activity |	GO:0005623 cell |
orf19.2785	3.06535	3.49833	2.9656	1.46193	1.8875	2.20072	ATP7	Putative subunit of the F1F0-ATPase complex; shows colony morphology-related gene regulation by Ssn6p; farnesol-, macrophage-downregulated protein abundance	GO:0006461 protein complex assembly | GO:0015986 ATP synthesis coupled proton transport |	GO:0046961 proton-transporting ATPase activity, rotational mechanism | GO:0046933 hydrogen ion transporting ATP synthase activity, rotational mechanism | GO:0016887 ATPase activity |	GO:0000274 mitochondrial proton-transporting ATP synthase, stator stalk | GO:0005886 plasma membrane |
orf19.5722	3.32182	3.90287	3.12774	1.29776	2.1438	1.93034		Predicted ORF in Assemblies 19, 20 and 21		GO:0003677 DNA binding |	GO:0005730 nucleolus | GO:0005840 ribosome |
orf19.6724	4.64283	6.15219	6.14886	1.69668	3.02789	3.20788	FUM12	Protein described as similar to fumarate hydratase, enzyme of citric acid cycle; fluconazole-downregulated; downregulated by Efg1p; transcriptionally regulated by iron; expression greater in high iron	GO:0006099 tricarboxylic acid cycle | GO:0006106 fumarate metabolic process |	GO:0004333 fumarate hydratase activity |	GO:0005759 mitochondrial matrix | GO:0005829 cytosol |
orf19.6725	4.0629	6.01081	6.73163	1.71291	3.23031	3.81583		Protein described as similar to fumarate hydratase, enzyme of citric acid cycle; fluconazole-downregulated; downregulated by Efg1p; merged with orf19.6724 in Assembly 20
orf19.5201.1	2.06119	2.42852	2.71142	1.27154	1.68839	1.64567		ORF added to Assembly 21 based on comparative genome analysis	GO:0032780 negative regulation of ATPase activity |	GO:0004857 enzyme inhibitor activity |	GO:0005739 mitochondrion |
orf19.2446	3.18507	4.09943	3.2208	1.63784	1.72609	1.8433		Predicted ORF in Assemblies 19, 20 and 21			GO:0005634 nucleus | GO:0005737 cytoplasm |
orf19.1789.1	2.70259	3.46161	2.71778	1.44423	1.62721	1.72531	LYS1	Saccharopine dehydrogenase (biosynthetic); enzyme of alpha-aminoadipate lysine biosynthesis pathway; functionally complements S. cerevisiae lys1 mutation; fungal-specific (no human or murine homolog)	GO:0019878 lysine biosynthetic process via aminoadipic acid |	GO:0004754 saccharopine dehydrogenase (NAD+, L-lysine-forming) activity |	GO:0005737 cytoplasm |
orf19.4451	2.8285	3.12723	2.26332	1.68446	1.67026	1.46677	RIA1	Putative translation elongation factor; genes encoding ribosomal subunits, translation factors, and tRNA synthetases are downregulated upon phagocytosis by murine macrophage	GO:0000466 maturation of 5.8S rRNA from tricistronic rRNA transcript (SSU-rRNA, 5.8S rRNA, LSU-rRNA) | GO:0042273 ribosomal large subunit biogenesis | GO:0000463 maturation of LSU-rRNA from tricistronic rRNA transcript (SSU-rRNA, 5.8S rRNA, LSU-rRNA) |	GO:0003746 translation elongation factor activity | GO:0003924 GTPase activity |	GO:0005737 cytoplasm |
orf19.6779	2.36124	3.49682	2.40294	1.51145	2.04138	1.56665	PRO2	Predicted ORF in Assemblies 19, 20 and 21; regulated by Gcn2p and Gcn4p	GO:0006561 proline biosynthetic process |	GO:0004350 glutamate-5-semialdehyde dehydrogenase activity |	GO:0005634 nucleus | GO:0005737 cytoplasm |
orf19.1815	2.25742	3.07338	2.03296	1.60924	2.23072	1.88982		Predicted ORF in Assemblies 19, 20 and 21	GO:0000466 maturation of 5.8S rRNA from tricistronic rRNA transcript (SSU-rRNA, 5.8S rRNA, LSU-rRNA) | GO:0000054 ribosome export from nucleus | GO:0042273 ribosomal large subunit biogenesis | GO:0000463 maturation of LSU-rRNA from tricistronic rRNA transcript (SSU-rRNA, 5.8S rRNA, LSU-rRNA) |	GO:0043023 ribosomal large subunit binding |	GO:0030687 preribosome, large subunit precursor | GO:0005730 nucleolus | GO:0005737 cytoplasm |
orf19.7646	2.12788	2.21852	1.39215	1.32913	1.50002	1.93732		Predicted ORF in Assemblies 19, 20 and 21	GO:0006364 rRNA processing | GO:0008361 regulation of cell size | GO:0006457 protein folding |		GO:0005732 small nucleolar ribonucleoprotein complex | GO:0005634 nucleus | GO:0005737 cytoplasm |
orf19.4921.1	11.6035	12.2098	3.2287	1.84426	5.3721	4.10787		ORF added to Assembly 21 based on comparative genome analysis
orf19.558	2.6253	2.86312	1.81565	1.38891	2.21795	1.92541	GUT1	Protein described as glycerol kinase; downregulated upon adherence to polystyrene; greater mRNA abundance observed in a cyr1 homozygous null mutant than in wild type	GO:0006071 glycerol metabolic process |	GO:0004370 glycerol kinase activity |	GO:0005737 cytoplasm |
orf19.832	3.35779	2.61907	1.60077	1.47985	2.11021	1.84777	GPI13	Protein of major facilitator superfamily; has phosphodiesterase/nucleotide pyrophosphatase domain; similar to S. cerevisiae Gpi13p, which acts in GPI anchor biosynthesis	GO:0006505 GPI anchor metabolic process | GO:0006506 GPI anchor biosynthetic process |	GO:0000234 phosphoethanolamine N-methyltransferase activity | GO:0051377 mannose-ethanolamine phosphotransferase activity |	GO:0016021 integral to membrane | GO:0005783 endoplasmic reticulum |
orf19.1020	2.29536	2.13326	1.20941	1.16449	1.93411	1.53797		Predicted ORF from Assembly 19; removed from Assembly 20; merged with orf19.5719 in Assembly 21
orf19.22	2.12408	2.02361	1.48944	0.967205	1.29129	1.57438		Transcription is positively regulated by Sfu1p; possibly spurious ORF (Annotation Working Group prediction)
orf19.6899	2.61839	4.39228	2.63287	1.33677	2.68441	2.78202		Predicted ORF in Assemblies 19, 20 and 21; mutation confers hypersensitivity to toxic ergosterol analog	GO:0042493 response to drug |
orf19.4393	4.13485	4.45225	4.94572	1.04896	3.69044	6.10587	CIT1	Protein described as citrate synthase; soluble protein in hyphae; biofilm induced; expression greater in high iron; upregulated upon phagocytosis; Hog1p-downregulated; regulated by Efg1p under yeast-form but not hyphal growth conditions	GO:0006099 tricarboxylic acid cycle | GO:0006537 glutamate biosynthetic process | GO:0006101 citrate metabolic process | GO:0046356 acetyl-CoA catabolic process |	GO:0003878 ATP citrate synthase activity | GO:0004108 citrate (Si)-synthase activity |	GO:0005625 soluble fraction | GO:0005759 mitochondrial matrix | GO:0005739 mitochondrion |
orf19.710	1.86837	2.28811	2.05456	1.01671	1.78806	2.158		Protein described as beta subunit of succinate-CoA ligase; transcription regulated by Mig1p and Tup1p; transcriptionally regulated by iron; expression greater in high iron; merged with orf19.1860 in Assembly 20
orf19.2599	2.07968	2.09783	2.01434	1.24102	1.71386	2.04349		Predicted ORF in Assemblies 19, 20 and 21	GO:0006631 fatty acid metabolic process |	GO:0005476 carnitine |	GO:0005743 mitochondrial inner membrane | GO:0005886 plasma membrane |
orf19.4669	2.66961	2.35388	2.20583	1.19303	1.95922	2.73185	AAT22	Protein not essential for viability; similar to S. cerevisiae Aat2p, which is an aspartate aminotransferase involved in nitrogen metabolism; clade-associated gene expression; protein level decreased in stationary phase cultures	GO:0006536 glutamate metabolic process | GO:0006533 aspartate catabolic process |	GO:0004069 L-aspartate |	GO:0005777 peroxisome |
orf19.6632	3.00073	3.33472	2.38539	1.39998	3.00109	3.27557	ACO2	Protein described as aconitate hydratase 2; regulated by Gcn4p; repressed in response to amino acid starvation (3-aminotriazole treatment); transcriptionally regulated by iron; expression greater in high iron		GO:0003994 aconitate hydratase activity |	GO:0005739 mitochondrion |
orf19.6141	1.94581	1.79346	1.40578	1.43754	2.04089	2.22539	HGT16	Putative glucose transporter of the major facilitator superfamily; the C. albicans glucose transporter family comprises 20 members; 12 probable membrane-spanning segments; gene has intron; expressed in rich medium with 2% glucose	GO:0015758 glucose transport | GO:0008643 carbohydrate transport |	GO:0005355 glucose transmembrane transporter activity | GO:0015578 mannose transmembrane transporter activity | GO:0005354 galactose transmembrane transporter activity | GO:0051119 sugar transmembrane transporter activity |	GO:0005887 integral to plasma membrane | GO:0016020 membrane |
orf19.3276	1.9936	2.05686	1.5123	1.45342	2.18356	2.58654	PWP2	Predicted ORF in Assemblies 19, 20 and 21; downregulated during core stress response; decreased expression in response to prostaglandins; physically interacts with TAP-tagged Nop1p	GO:0030010 establishment of cell polarity | GO:0000910 cytokinesis | GO:0000480 endonucleolytic cleavage in 5'-ETS of tricistronic rRNA transcript (SSU-rRNA, 5.8S rRNA, LSU-rRNA) | GO:0000472 endonucleolytic cleavage to generate mature 5'-end of SSU-rRNA from (SSU-rRNA, 5.8S rRNA, LSU-rRNA) | GO:0000447 endonucleolytic cleavage in ITS1 to separate SSU-rRNA from 5.8S rRNA and LSU-rRNA from tricist…	GO:0030515 snoRNA binding |	GO:0005732 small nucleolar ribonucleoprotein complex | GO:0034388 Pwp2p-containing subcomplex of 90S preribosome | GO:0005737 cytoplasm | GO:0032040 small-subunit processome |
orf19.3099	2.10177	1.96468	1.44135	1.34723	2.20622	2.30028	TRP4	Predicted enzyme of amino acid biosynthesis; upregulated in biofilm; regulated by Gcn2p and Gcn4p; S. cerevisiae ortholog is Gcn4p regulated	GO:0000162 tryptophan biosynthetic process |	GO:0004048 anthranilate phosphoribosyltransferase activity |	GO:0005634 nucleus | GO:0005737 cytoplasm |
orf19.2003	2.01337	2.15777	1.54869	1.51459	2.43149	2.42436	HNM1	Predicted ORF in Assemblies 19, 20 and 21; mutation confers hypersensitivity to toxic ergosterol analog; shows colony morphology-related gene regulation by Ssn6p; clade-associated gene expression	GO:0015871 choline transport | GO:0042493 response to drug |	GO:0015220 choline transmembrane transporter activity |	GO:0005886 plasma membrane |
orf19.4885	2.04476	2.10247	1.63625	1.3588	2.09931	2.48249	MIR1	Putative mitochondrial phosphate transporter; caspofungin repressed; expression is increased in a fluconazole-resistant isolate; induced upon adherence to polystyrene	GO:0006817 phosphate transport |	GO:0015114 phosphate transmembrane transporter activity | GO:0005315 inorganic phosphate transmembrane transporter activity |	GO:0005739 mitochondrion | GO:0005740 mitochondrial envelope | GO:0005886 plasma membrane |
orf19.6630	2.05008	1.86431	1.73107	1.48516	2.45102	2.57245		ORF Predicted by Annotation Working Group
orf19.789	1.97081	2.26229	1.94149	1.81627	2.38972	3.09692	PYC2	Putative pyruvate carboxylase, binds to biotin cofactor; up-regulated in mutant lacking the Ssk1p response regulator protein, upon benomyl treatment, or in an azole-resistant strain overexpressing MDR1	GO:0006740 NADPH regeneration | GO:0006094 gluconeogenesis |	GO:0004736 pyruvate carboxylase activity |	GO:0005829 cytosol |
orf19.5870	2.07354	2.59081	1.7794	1.03896	2.32312	2.6961	CTP1	Predicted ORF in Assemblies 19, 20 and 21; flucytosine induced; amphotericin B repressed, caspofungin repressed	GO:0006843 mitochondrial citrate transport | GO:0055085 transmembrane transport |	GO:0005371 tricarboxylate secondary active transmembrane transporter activity |	GO:0005743 mitochondrial inner membrane | GO:0005739 mitochondrion | GO:0005886 plasma membrane |
orf19.5243	1.8821	2.083	1.58253	1.16009	2.27336	2.68709	TRP3	Predicted ORF in Assemblies 19, 20 and 21; regulated by Gcn2p and Gcn4p	GO:0000162 tryptophan biosynthetic process |	GO:0004049 anthranilate synthase activity | GO:0004425 indole-3-glycerol-phosphate synthase activity |	GO:0005950 anthranilate synthase complex |
orf19.7534	2.56996	2.90294	1.52063	1.30815	2.52787	3.14045	MIS12	Predicted ORF in Assemblies 19, 20 and 21	GO:0006139 nucleobase, nucleoside, nucleotide and nucleic acid metabolic process | GO:0006520 cellular amino acid metabolic process |	GO:0004488 methylenetetrahydrofolate dehydrogenase (NADP+) activity | GO:0004477 methenyltetrahydrofolate cyclohydrolase activity | GO:0004329 formate-tetrahydrofolate ligase activity |	GO:0005739 mitochondrion |
orf19.7645	2.15976	2.17982	1.55527	0.917905	2.63372	2.34396		Biotin protein ligase; catalyzes covalent attachment of biotin to biotin-dependent enzymes including acetyl CoA carboxylase and pyruvate carboxylase	GO:0009305 protein amino acid biotinylation |	GO:0004080 biotin-[propionyl-CoA-carboxylase (ATP-hydrolyzing)] ligase activity | GO:0004079 biotin-[methylmalonyl-CoA-carboxytransferase] ligase activity | GO:0004078 biotin-[methylcrotonoyl-CoA-carboxylase] ligase activity | GO:0004077 biotin-[acetyl-CoA-carboxylase] ligase activity | GO:0018271 biotin-protein ligase activity |	GO:0005737 cytoplasm |
orf19.1646	2.06967	1.94697	1.48356	0.737741	2.46297	2.3131		Predicted ORF in Assemblies 19, 20 and 21	GO:0034462 small-subunit processome assembly | GO:0000480 endonucleolytic cleavage in 5'-ETS of tricistronic rRNA transcript (SSU-rRNA, 5.8S rRNA, LSU-rRNA) | GO:0000472 endonucleolytic cleavage to generate mature 5'-end of SSU-rRNA from (SSU-rRNA, 5.8S rRNA, LSU-rRNA) | GO:0000447 endonucleolytic cleavage in ITS1 to separate SSU-rRNA from 5.8S rRNA and LSU-rRNA from tricistronic rRNA transcript …		GO:0030686 90S preribosome | GO:0005730 nucleolus |
orf19.3265	2.49922	2.1023	2.06329	0.927623	2.49194	2.57555	TRM1	Protein described as an N2,N2-dimethylguanine tRNA methyltransferase; induced upon adherence to polystyrene	GO:0030488 tRNA methylation |	GO:0004809 tRNA (guanine-N2-)-methyltransferase activity |	GO:0005640 nuclear outer membrane | GO:0005739 mitochondrion | GO:0005635 nuclear envelope |
orf19.6994	1.66251	1.85109	1.83409	0.785825	2.23976	2.28552	BAT22	Protein described as a branched chain amino acid aminotransferase; regulated by Gcn4p; induced in response to amino acid starvation (3-aminotriazole treatment), farnesol treatment	GO:0009082 branched chain family amino acid biosynthetic process |	GO:0004084 branched-chain-amino-acid transaminase activity |	GO:0005737 cytoplasm |
orf19.2970	1.91709	3.12642	1.99816	0.87633	2.34119	2.91221	LYS2	Large subunit of heterodimeric alpha-aminoadipate reductase; enzyme of lysine biosynthesis; contains predicted binding sites for AMP and alpha-aminoadipate; feedback inhibited by lysine or thialysine; regulated by Gcn2p and Gcn4p	GO:0009085 lysine biosynthetic process | GO:0019878 lysine biosynthetic process via aminoadipic acid |	GO:0004043 L-aminoadipate-semialdehyde dehydrogenase activity |	GO:0016020 membrane | GO:0005737 cytoplasm |
orf19.5147	1.47056	1.77471	1.80573	1.33969	2.53416	2.50142		Predicted ORF in Assemblies 19, 20 and 21			GO:0005737 cytoplasm |
orf19.5791	1.57161	1.93076	1.72618	1.19989	2.08842	2.87287	IDH2	Protein described as isocitrate dehydrogenase subunit; transcription is upregulated in response to treatment with ciclopirox olamine; transcriptionally regulated by iron; expression greater in high iron	GO:0006099 tricarboxylic acid cycle | GO:0006102 isocitrate metabolic process | GO:0006537 glutamate biosynthetic process |	GO:0004448 isocitrate dehydrogenase activity | GO:0004449 isocitrate dehydrogenase (NAD+) activity |	GO:0005962 mitochondrial isocitrate dehydrogenase complex (NAD+) |
orf19.409	2.5494	2.47501	2.18765	1.98874	7.50937	9.42515		Predicted membrane protein; similar to S. cerevisiae Ynr018Wp			GO:0016020 membrane | GO:0005739 mitochondrion | GO:0005886 plasma membrane |
orf19.5015	1.62336	1.41548	1.52938	1.17792	2.06187	2.93782	MYO2	Class V myosin; nonessential; required for wild-type actin cytoskeletal polarity, nuclear organization and migration, and hyphal growth; sole class V myosin in C. albicans; conserved myosin ATPase and tail domains	GO:0040023 establishment of nucleus localization | GO:0006997 nucleus organization | GO:0030448 hyphal growth | GO:0007163 establishment or maintenance of cell polarity | GO:0030036 actin cytoskeleton organization | GO:0006897 endocytosis | GO:0030050 vesicle transport along actin filament | GO:0007118 budding cell apical bud growth | GO:0000001 mitochondrion inheritance | GO:0045033 peroxisome i…	GO:0003774 motor activity | GO:0000146 microfilament motor activity | GO:0051015 actin filament binding | GO:0005516 calmodulin binding |	GO:0016461 unconventional myosin complex | GO:0030478 actin cap | GO:0043332 mating projection tip | GO:0005934 cellular bud tip | GO:0031982 vesicle | GO:0031941 filamentous actin | GO:0000329 fungal-type vacuole membrane | GO:0032432 actin filament bundle | GO:0005935 cellular bud neck | GO:0000131 incipient cellular bud site |
orf19.6385	1.80242	1.77299	1.80505	1.13937	3.26575	4.03984	ACO1	Protein described as aconitase; Gcn4p-regulated; amino acid starvation (3-AT treatment), amphotericin B, phagocytosis, farnesol induced; fluconazole-downregulated; expression greater in high iron; antigenic in human or murine infection	GO:0044416 induction by symbiont of host defense response | GO:0006099 tricarboxylic acid cycle | GO:0019541 propionate metabolic process | GO:0006537 glutamate biosynthetic process | GO:0006101 citrate metabolic process | GO:0042493 response to drug | GO:0000002 mitochondrial genome maintenance |	GO:0003994 aconitate hydratase activity | GO:0003690 double-stranded DNA binding | GO:0003697 single-stranded DNA binding |	GO:0005625 soluble fraction | GO:0005829 cytosol | GO:0042645 mitochondrial nucleoid |
orf19.986	1.10988	1.45445	1.31104	0.918451	2.01551	2.05638	GLY1	L-threonine aldolase; possibly tetrameric; complements the glycine auxotrophy of an S. cerevisiae shm1 null shm2 null gly1-1 triple mutant; macrophage/pseudohyphal-induced; the GLY1 locus has an RFLP and is triploid in strain SGY269	GO:0006730 one-carbon metabolic process | GO:0006544 glycine metabolic process | GO:0006567 threonine catabolic process | GO:0006545 glycine biosynthetic process |	GO:0004793 threonine aldolase activity |
orf19.4773	1.48327	2.65647	1.76555	1.52913	17.1689	46.8691	AOX2	Alternative oxidase; induced by antimycin A, some oxidants; growth- and carbon-source-regulated; one of two isoforms (Aox1p and Aox2p); involved in cyanide-resistant respiratory pathway that is absent from S. cerevisiae	GO:0045333 cellular respiration | GO:0009060 aerobic respiration |	GO:0009916 alternative oxidase activity |	GO:0005739 mitochondrion | GO:0005886 plasma membrane |
orf19.2808	1.1698	1.25665	1.20426	1.2629	2.26565	2.77281		Predicted zinc-finger protein of unknown function, not essential for viability		GO:0003700 transcription factor activity |
orf19.7088	1.65447	1.29858	0.971872	1.1977	2.27827	2.94761		Predicted ORF in Assemblies 19, 20 and 21	GO:0006400 tRNA modification | GO:0000723 telomere maintenance |	GO:0043047 single-stranded telomeric DNA binding |	GO:0005737 cytoplasm |
orf19.6052	1.61182	1.33004	1.08681	1.19528	2.48531	2.79953	CNS1	Predicted ORF in Assemblies 19, 20 and 21; mutation confers hypersensitivity to radicicol	GO:0006461 protein complex assembly | GO:0042493 response to drug | GO:0006457 protein folding |	GO:0051879 Hsp90 protein binding | GO:0030544 Hsp70 protein binding |	GO:0005737 cytoplasm |
orf19.431	1.28017	1.21403	1.06809	1.02219	2.04729	2.01686		Putative transcription factor with zinc cluster DNA-binding motif	GO:0006355 regulation of transcription, DNA-dependent |	GO:0003700 transcription factor activity |
orf19.2746	1.49896	1.17466	1.05803	1.02942	2.22131	2.25297		Predicted ORF in Assemblies 19, 20 and 21	GO:0006810 transport | GO:0007124 pseudohyphal growth | GO:0001403 invasive growth in response to glucose limitation |	GO:0005215 transporter activity |	GO:0005624 membrane fraction | GO:0005768 endosome |
orf19.2875	1.48037	1.05183	1.2849	1.44277	2.40043	2.65593		Predicted ORF in Assemblies 19, 20 and 21	GO:0006616 SRP-dependent cotranslational protein targeting to membrane, translocation | GO:0006615 SRP-dependent cotranslational protein targeting to membrane, docking |	GO:0005047 signal recognition particle binding |	GO:0005785 signal recognition particle receptor complex |
orf19.6034	1.19778	1.05841	1.14991	1.41459	2.33215	2.45828	TUB2	Beta-tubulin; functional homolog of ScTub2p; hyphal-induced; fluconazole-induced; gene has two introns; overproduction causes inviability in S. cerevisiae; slow growth, increased white-to opaque switching in ectopic expression strains	GO:0000743 nuclear migration during conjugation with cellular fusion | GO:0000070 mitotic sister chromatid segregation | GO:0045143 homologous chromosome segregation | GO:0042493 response to drug |	GO:0005200 structural constituent of cytoskeleton |	GO:0045298 tubulin complex | GO:0005827 polar microtubule | GO:0005880 nuclear microtubule | GO:0005828 kinetochore microtubule | GO:0005881 cytoplasmic microtubule | GO:0005876 spindle microtubule | GO:0005816 spindle pole body |
orf19.7313	2.4651	1.4672	1.06288	2.42113	11.5097	9.26781	SSU1	Protein similar to S. cerevisiae Ssu1p sulfite transport protein; transposon mutation affects filamentous growth; regulated by Gcn2p and Gcn4p; induced by nitric oxide	GO:0030447 filamentous growth | GO:0000316 sulfite transport |	GO:0000319 sulfite transmembrane transporter activity |	GO:0005886 plasma membrane |
orf19.2654	1.82314	1.63004	1.28152	1.47802	2.34462	3.18196	RMS1	Protein induced during the mating process	GO:0006350 transcription | GO:0018026 peptidyl-lysine monomethylation |	GO:0016279 protein-lysine N-methyltransferase activity |	GO:0005634 nucleus |
orf19.3934	3.53786	2.30111	1.32908	1.72808	3.92247	7.14464	CAR1	Transcription is regulated by Nrg1p, Mig1p, and Tup1p; shows colony morphology-related gene regulation by Ssn6p; alkaline upregulated; protein level decreased in stationary phase cultures	GO:0019547 arginine catabolic process to ornithine |	GO:0004053 arginase activity | GO:0030145 manganese ion binding | GO:0008270 zinc ion binding |	GO:0043332 mating projection tip |
orf19.3370	1.68891	1.14431	1.0811	1.40699	2.02321	2.76765	DOT4	Protein similar to ubiquitin C-terminal hydrolase; localizes to cell surface of hyphal cells, but not yeast-form cells; repressed upon high-level peroxide stress	GO:0006348 chromatin silencing at telomere | GO:0016579 protein deubiquitination |	GO:0004843 ubiquitin-specific protease activity |	GO:0030446 hyphal cell wall | GO:0009986 cell surface | GO:0005634 nucleus |
orf19.1663	1.98795	1.23392	1.30578	1.57307	2.08884	2.12582	MNT2	Alpha-1,2-mannosyl transferase; adds third mannose during cell-wall mannoprotein biosynthesis; partially redundant with Mnt1p; role in adherence and virulence; expressed in yeast-form and hyphal cells; fungal-specific	GO:0006057 mannoprotein biosynthetic process | GO:0009405 pathogenesis | GO:0016337 cell-cell adhesion | GO:0007160 cell-matrix adhesion | GO:0030447 filamentous growth | GO:0007047 cell wall organization | GO:0051834 evasion or tolerance of defenses of other organism during symbiotic interaction | GO:0006493 protein amino acid O-linked glycosylation | GO:0000032 cell wall mannoprotein biosynthet…	GO:0000026 alpha-1,2-mannosyltransferase activity |	GO:0000139 Golgi membrane | GO:0016021 integral to membrane |
orf19.5098	1.15917	1.55072	1.16683	1.45445	3.07432	2.3813	NTG1	Protein with strong similarity to both S. cerevisiae Ntg1p and Ntg2p DNA repair glycosylases; transcriptionally regulated by iron; expression greater in high iron	GO:0006285 base-excision repair, AP site formation |	GO:0000703 oxidized pyrimidine base lesion DNA N-glycosylase activity |	GO:0005634 nucleus |
orf19.1363	1.48774	2.07276	0.963175	1.66051	4.30244	3.31355		Predicted ORF in Assemblies 19, 20 and 21; Plc1p-regulated; transcriptionally activated by Mnl1p under weak acid stress	GO:0030437 ascospore formation | GO:0045944 positive regulation of transcription from RNA polymerase II promoter |
orf19.3362	1.49632	1.29945	1.15312	1.58625	4.88536	2.32514		Predicted ORF in Assemblies 19, 20 and 21	GO:0000304 response to singlet oxygen |		GO:0005886 plasma membrane |
orf19.3710	1.48112	1.90671	1.84885	1.96187	3.65027	3.53877	YHB5	Protein related to flavohemoglobins; not required for wild-type nitric oxide resistance; has predicted globin, FAD-binding, and NAD(P)-binding domains but lacks some conserved residues of flavohemoglobins; mRNA detected; filament induced	GO:0006950 response to stress |	GO:0008941 nitric oxide dioxygenase activity |
orf19.2192	1.36125	1.62354	2.01754	1.74514	3.04382	3.20935	GDH2	Putative NAD-specific glutamate dehydrogenase; fungal-specific (no human or murine homolog); transcription is regulated by Nrg1p, Mig1p, Tup1p, and Gcn4p	GO:0006807 nitrogen compound metabolic process |	GO:0004352 glutamate dehydrogenase activity |	GO:0005739 mitochondrion |
orf19.7615	1.26682	1.71984	1.40441	1.5068	2.07407	2.40132		Predicted ORF in Assemblies 19, 20 and 21	GO:0006888 ER to Golgi vesicle-mediated transport |	GO:0005088 Ras guanyl-nucleotide exchange factor activity |	GO:0030008 TRAPP complex |
orf19.7411	1.25757	1.82172	1.63831	2.17385	3.62669	2.82802	OAC1	Predicted ORF in Assemblies 19, 20 and 21; transcription is upregulated in both intermediate and mature biofilms	GO:0008272 sulfate transport | GO:0034659 isopropylmalate transport | GO:0015729 oxaloacetate transport |	GO:0000227 oxaloacetate secondary active transmembrane transporter activity | GO:0008271 secondary active sulfate transmembrane transporter activity | GO:0034658 isopropylmalate transmembrane transporter activity |	GO:0005743 mitochondrial inner membrane |
orf19.547	1.35507	1.49497	1.28238	1.79317	2.5824	2.57305		Predicted ORF in Assemblies 19, 20 and 21	GO:0043137 DNA replication, removal of RNA primer | GO:0001302 replicative cell aging | GO:0000734 gene conversion at mating-type locus, DNA repair synthesis | GO:0006303 double-strand break repair via nonhomologous end joining | GO:0006286 base-excision repair, base-free sugar-phosphate removal |	GO:0008409 5'-3' exonuclease activity | GO:0017108 5'-flap endonuclease activity |	GO:0005634 nucleus |
orf19.7516	1.22657	1.3168	1.30959	1.57168	2.06716	2.08		Predicted ORF in Assemblies 19, 20 and 21
orf19.7500	1.29142	1.33979	1.44889	2.15914	2.2592	2.36213	PXA1	Putative peroxisomal, half-size adrenoleukodystrophy protein (ALD or ALDp) subfamily ABC family transporter	GO:0006810 transport | GO:0015908 fatty acid transport |	GO:0042626 ATPase activity, coupled to transmembrane movement of substances | GO:0005524 ATP binding |	GO:0016021 integral to membrane | GO:0005779 integral to peroxisomal membrane |
orf19.4456	1.44735	1.58137	1.47748	2.70579	3.25773	2.95094	GAP4	Putative amino acid permease; hyphal induced; regulated by Gcn2p and Gcn4p; shows colony morphology-related gene regulation by Ssn6p; detected at plasma membrane of yeast-form and germ tube by mass spectrometry	GO:0006865 amino acid transport |		GO:0005887 integral to plasma membrane | GO:0005886 plasma membrane |
orf19.6072	1.36968	1.43813	1.75484	2.50419	3.52015	2.93235		Predicted ORF in Assemblies 19, 20 and 21
orf19.5271	1.66037	1.49864	1.44596	1.7686	2.45453	2.6736		Predicted ORF in Assemblies 19, 20 and 21
orf19.7150	1.59231	1.4376	1.63725	1.73523	2.48429	2.72126	NRG1	Transcriptional repressor; regulates hyphal genes, virulence genes, chlamydospore development, and genes involved in rescue and stress responses; effects both Tup1p-dependent (major) and -independent (minor) regulation	GO:0016481 negative regulation of transcription | GO:0000122 negative regulation of transcription from RNA polymerase II promoter | GO:0009405 pathogenesis | GO:0030447 filamentous growth | GO:0030448 hyphal growth | GO:0001410 chlamydospore formation | GO:0006355 regulation of transcription, DNA-dependent | GO:0009372 quorum sensing | GO:0045827 negative regulation of isoprenoid metabolic proces…	GO:0016564 transcription repressor activity | GO:0003704 specific RNA polymerase II transcription factor activity | GO:0003690 double-stranded DNA binding | GO:0003700 transcription factor activity | GO:0043565 sequence-specific DNA binding |
orf19.2990	1.84346	1.66338	1.93186	2.58211	4.42402	3.7585	XOG1	Exo-1,3-beta-glucanase, major exoglucanase; member of family 5 glycosyl hydrolases; affects sensitivity to inhibitors of chitin and glucan synthesis; not required for yeast-to-hyphal transition or for virulence in mouse systemic infection	GO:0007047 cell wall organization | GO:0006073 cellular glucan metabolic process |	GO:0004338 glucan 1,3-beta-glucosidase activity |	GO:0005576 extracellular region | GO:0009277 fungal-type cell wall |
orf19.2671	1.57779	1.3937	1.22451	1.71311	2.12795	2.43915		Predicted ORF in Assemblies 19, 20 and 21; Plc1p-regulated	GO:0000304 response to singlet oxygen |		GO:0005886 plasma membrane |
orf19.7680	1.20407	1.13575	1.65237	1.98317	3.29768	2.87451	CTA26	Putative transcriptional activator; downregulated by Efg1p; transcription is upregulated in an RHE model of oral candidiasis; member of a family of telomere-proximal genes	GO:0045893 positive regulation of transcription, DNA-dependent |	GO:0016563 transcription activator activity |
orf19.3074	1.31091	1.2229	1.56903	1.5829	2.7275	2.28455	TLO10	Member of a family of telomere-proximal genes of unknown function
orf19.2995	1.531	1.40337	1.34533	2.07357	1.5584	2.03566		Predicted ORF in Assemblies 19, 20 and 21; induced by nitric oxide
orf19.4666	1.16971	1.34691	1.83812	2.26258	1.95159	2.16787		Predicted ORF in Assemblies 19, 20 and 21; hyphal-induced expression, regulated by Cyr1p, Ras1p, Efg1p; possibly spurious ORF (Annotation Working Group prediction)
orf19.4941	1.09082	0.964981	1.52206	1.27179	2.18354	3.73582	TYE7	Putative bHLH (basic region, helix-loop-helix) transcription factor; hyphally regulated via Cph1p, Cyr1p; flucytosine, Hog1p induced; amphotericin B, caspofungin repressed; downregulated in azole-resistant strain overexpressing MDR1	GO:0045821 positive regulation of glycolysis | GO:0006350 transcription | GO:0045991 positive regulation of transcription by carbon catabolites |	GO:0003700 transcription factor activity | GO:0043565 sequence-specific DNA binding | GO:0016563 transcription activator activity |	GO:0000790 nuclear chromatin |
orf19.6873.1	1.53864	1.24747	0.59516	1.11841	4.02132	3.14006		ORF Predicted by Annotation Working Group	GO:0000080 G1 phase of mitotic cell cycle | GO:0017183 peptidyl-diphthamide biosynthetic process from peptidyl-histidine | GO:0002098 tRNA wobble uridine modification |	GO:0005506 iron ion binding | GO:0008270 zinc ion binding | GO:0009055 electron carrier activity |	GO:0005634 nucleus | GO:0005737 cytoplasm |
orf19.4227	1.46066	1.19167	1.35168	3.84137	2.45881	1.43913		Predicted ORF in Assemblies 19, 20 and 21; possibly spurious ORF (Annotation Working Group prediction)
orf19.4861	1.55503	1.17528	1.30895	4.41499	2.94133	1.5158		Predicted ORF in Assemblies 19, 20 and 21
orf19.425	1.62744	1.3598	1.42998	5.89964	3.6114	1.92635		Protein not essential for viability
orf19.2887	1.66806	1.06989	1.10466	3.01278	2.04924	1.44119	MET13	Predicted ORF in Assemblies 19, 20 and 21; ketoconazole-induced; amphotericin B repressed			GO:0043332 mating projection tip | GO:0005933 cellular bud | GO:0005840 ribosome |
orf19.4959	1.5084	1.21923	1.03074	2.81003	2.09349	1.25654		Predicted ORF in Assemblies 19, 20 and 21
orf19.1582	1.19935	1.23346	1.0935	3.07615	2.26209	1.14236		Predicted membrane transporter, member of the drug:proton antiporter (12 spanner) (DHA1) family, major facilitator superfamily (MFS)	GO:0015893 drug transport |	GO:0015238 drug transporter activity |	GO:0005886 plasma membrane | GO:0016020 membrane |
orf19.3174	1.21811	1.30858	0.993461	3.00082	2.56418	1.21804	CDC24	GDP-GTP exchange factor for Cdc42p; phosphorylated; required for maintenance of hyphal growth; misexpression blocks hyphal growth and causes avirulence in a mouse model of systemic infection; antigenic during human oral infection	GO:0030010 establishment of cell polarity | GO:0009405 pathogenesis | GO:0030448 hyphal growth | GO:0007118 budding cell apical bud growth | GO:0006033 chitin localization | GO:0007124 pseudohyphal growth | GO:0000750 pheromone-dependent signal transduction involved in conjugation with cellular fusion | GO:0007096 regulation of exit from mitosis | GO:0001403 invasive growth in response to glucose…	GO:0005085 guanyl-nucleotide exchange factor activity | GO:0004871 signal transducer activity | GO:0005089 Rho guanyl-nucleotide exchange factor activity |	GO:0001411 hyphal tip | GO:0043332 mating projection tip | GO:0005634 nucleus | GO:0005935 cellular bud neck | GO:0000131 incipient cellular bud site |
orf19.3282	1.08831	1.26765	0.981579	2.93328	2.00454	1.26602	BMT3	Putative beta-mannosyltransferase, required for addition of the 2nd beta-mannose to the acid-stable fraction of cell wall phosphopeptidomannan and for elongation of beta-mannose chains on the phosphopeptidomannan acid-labile fraction	GO:0070135 beta-1,2-oligomannoside metabolic process |
orf19.3742	3.02602	3.0485	1.35526	31.7684	8.84	1.64658		Predicted ORF in Assemblies 19, 20 and 21; expression regulated during planktonic growth; greater mRNA abundance observed in a cyr1 homozygous null mutant than in wild type; possibly spurious ORF (Annotation Working Group prediction)
orf19.1058	1.40925	1.4593	1.15032	3.85803	2.50161	1.01352		Predicted ORF in Assemblies 19, 20 and 21	GO:0006511 ubiquitin-dependent protein catabolic process |	GO:0043130 ubiquitin binding |	GO:0008541 proteasome regulatory particle, lid subcomplex | GO:0034515 proteasome storage granule |
orf19.7521	1.63843	1.61148	1.42249	2.81006	2.76209	2.13781	REP1	Protein involved in negative regulation of MDR1 transcription; mutants show increased resistance to azole drugs	GO:0042493 response to drug |
orf19.713	1.71301	1.88144	1.56211	2.96463	2.68032	2.09853		Predicted ORF in Assemblies 19, 20 and 21	GO:0006915 apoptosis |		GO:0005634 nucleus | GO:0005737 cytoplasm |
orf19.6742	1.68799	1.75314	1.68342	3.49945	3.24569	3.07101		Predicted ORF in Assemblies 19, 20 and 21	GO:0006350 transcription | GO:0006470 protein amino acid dephosphorylation |	GO:0004721 phosphoprotein phosphatase activity |	GO:0005634 nucleus |
orf19.4963	1.74118	1.49258	1.3694	3.21047	2.2654	1.97505		Predicted ORF in Assemblies 19, 20 and 21			GO:0005634 nucleus | GO:0005737 cytoplasm |
orf19.4445	1.67882	2.09021	1.63	2.44534	2.688	2.10723		Predicted ORF in Assemblies 19, 20 and 21; Plc1p-regulated	GO:0030447 filamentous growth |
orf19.1280	2.8509	3.15848	2.23889	4.94419	7.04099	4.1536	SUI1	Putative translation initiation factor; flucytosine induced; genes encoding ribosomal subunits, translation factors, and tRNA synthetases are downregulated upon phagocytosis by murine macrophage	GO:0006413 translational initiation |	GO:0003743 translation initiation factor activity |	GO:0005840 ribosome | GO:0043614 multi-eIF complex |
orf19.6126	1.68645	2.52926	2.4974	3.62289	4.92017	3.67436	KGD2	Protein described as dihydrolipoamide S-succinyltransferase; transcriptionally regulated by iron; expression greater in high iron	GO:0006099 tricarboxylic acid cycle | GO:0006103 2-oxoglutarate metabolic process |	GO:0030523 dihydrolipoamide S-acyltransferase activity | GO:0004149 dihydrolipoyllysine-residue succinyltransferase activity |	GO:0042645 mitochondrial nucleoid | GO:0009353 mitochondrial oxoglutarate dehydrogenase complex |
orf19.715	1.44452	1.9567	1.78563	5.52857	4.34177	2.36689		Predicted ORF in Assemblies 19, 20 and 21
orf19.6684	1.31938	1.46148	1.46038	2.98197	2.58368	1.53145	PNC1	Putative nicotinamidase, involved in NAD salvage pathway; decreased transcription is observed in an azole-resistant strain that overexpresses MDR1	GO:0019358 nicotinate nucleotide salvage | GO:0006348 chromatin silencing at telomere | GO:0001302 replicative cell aging | GO:0000183 chromatin silencing at rDNA |	GO:0008936 nicotinamidase activity |	GO:0005634 nucleus | GO:0005777 peroxisome |
orf19.5056	1.22477	1.45405	1.48969	2.292	2.403	1.53264		Predicted ORF in Assemblies 19, 20 and 21	GO:0000022 mitotic spindle elongation | GO:0007091 mitotic metaphase/anaphase transition | GO:0000070 mitotic sister chromatid segregation | GO:0008054 cyclin catabolic process |	GO:0008047 enzyme activator activity |	GO:0005680 anaphase-promoting complex |
orf19.7654	1.31529	1.97585	2.02046	6.64875	6.983	2.12608	CPR6	Predicted ORF in Assemblies 19, 20 and 21; macrophage/pseudohyphal-repressed; heavy metal (cadmium) stress-induced; heterozygous null mutant displays sensitivity to virgineone	GO:0006457 protein folding |	GO:0003755 peptidyl-prolyl cis-trans isomerase activity | GO:0051082 unfolded protein binding |	GO:0005737 cytoplasm |
orf19.1486	1.4839	2.1147	2.1304	6.688	5.68469	3.67281		Predicted ORF in Assemblies 19, 20 and 21; possibly spurious ORF (Annotation Working Group prediction)
orf19.2531	2.40867	2.00799	2.94892	5.04881	5.14201	2.46386	CSP37	Plasma membrane, hyphal cell wall protein; role in progression of murine systemic infection; predicted P-loop, divalent cation binding, N-glycosylation sites; expressed in yeast and hyphae; hyphal downregulated; lacks S. cerevisiae homolog	GO:0009405 pathogenesis | GO:0006461 protein complex assembly | GO:0006888 ER to Golgi vesicle-mediated transport |		GO:0016021 integral to membrane | GO:0005886 plasma membrane | GO:0009986 cell surface | GO:0005624 membrane fraction | GO:0030446 hyphal cell wall | GO:0005625 soluble fraction |
orf19.1809	1.33091	1.47764	1.76591	2.29569	2.4044	1.75314		Predicted 3-hydroxyacyl-CoA epimerase; upregulated upon phagocytosis; transcription is regulated by Mig1p; expression is regulated upon white-opaque switching; merged with orf19.1288 in Assembly 20
orf19.7284	1.78142	1.66978	1.79661	3.41805	4.6039	1.74727	ASR2	Gene regulated by cAMP and by osmotic stress; greater mRNA abundance observed in a cyr1 or ras1 homozygous null mutant than in wild type; protein detected by mass spec in stationary phase cultures
orf19.4162	1.34693	1.54209	1.18081	2.961	3.77974	1.8438	MLH1	Predicted ORF in Assemblies 19, 20 and 21; cell-cycle regulated periodic mRNA expression	GO:0000710 meiotic mismatch repair | GO:0007131 reciprocal meiotic recombination | GO:0000713 meiotic heteroduplex formation |	GO:0032139 dinucleotide insertion or deletion binding | GO:0000404 loop DNA binding | GO:0003697 single-stranded DNA binding | GO:0016887 ATPase activity | GO:0005524 ATP binding |	GO:0032389 MutLalpha complex | GO:0005739 mitochondrion | GO:0032390 MutLbeta complex |
orf19.5772	1.33861	1.4504	1.10756	2.19781	2.31602	1.45515		Predicted ORF in Assemblies 19, 20 and 21	GO:0043486 histone exchange |		GO:0000812 Swr1 complex |
orf19.6192	1.82707	1.7418	1.45263	3.75543	5.56948	3.35807		Predicted ORF in Assemblies 19, 20 and 21; Plc1p-regulated; possibly spurious ORF (Annotation Working Group prediction)
orf19.3206	1.46744	1.55773	1.20533	2.28011	2.71942	1.7817	CCT7	Predicted ORF in Assemblies 19, 20 and 21. Protein detected by mass spec in exponential and stationary phase cultures.	GO:0006457 protein folding | GO:0007010 cytoskeleton organization | GO:0006461 protein complex assembly |	GO:0051082 unfolded protein binding |	GO:0005856 cytoskeleton | GO:0005832 chaperonin-containing T-complex |
orf19.7672	1.39298	1.8079	0.969723	2.5269	2.4451	1.57578		Predicted ORF in Assemblies 19, 20 and 21	GO:0030968 endoplasmic reticulum unfolded protein response |		GO:0005783 endoplasmic reticulum |
orf19.2401	1.45612	1.64765	1.59186	3.12775	2.4827	1.53934		Predicted ORF in Assemblies 19, 20 and 21	GO:0006501 C-terminal protein lipidation | GO:0034727 piecemeal microautophagy of nucleus | GO:0006612 protein targeting to membrane | GO:0000045 autophagic vacuole formation | GO:0051605 protein maturation by peptide bond cleavage |	GO:0004197 cysteine-type endopeptidase activity |	GO:0005875 microtubule associated complex | GO:0005829 cytosol |
orf19.4361	1.5821	1.85242	1.54482	3.98483	3.27741	1.75917	IFF3	Putative GPI-anchored protein of unknown function			GO:0009986 cell surface |
orf19.4993	1.64425	1.63719	1.48518	3.06457	2.71978	1.6336	SEC18	Functional homolog of S. cerevisiae Sec18p, which acts in protein transport; conserved ATP binding site; not glycosylated	GO:0048193 Golgi vesicle transport | GO:0043001 Golgi to plasma membrane protein transport | GO:0006888 ER to Golgi vesicle-mediated transport | GO:0009306 protein secretion | GO:0034727 piecemeal microautophagy of nucleus | GO:0042144 vacuole fusion, non-autophagic | GO:0000011 vacuole inheritance |	GO:0005524 ATP binding | GO:0016887 ATPase activity |	GO:0043332 mating projection tip | GO:0005737 cytoplasm | GO:0019897 extrinsic to plasma membrane |
orf19.1938	1.68839	1.95908	1.53574	2.89352	2.36138	1.61447		Decreased transcription is observed in an azole-resistant strain that overexpresses CDR1 and CDR2; increased transcription is observed upon benomyl treatment
orf19.506	2.23905	2.29775	1.97325	5.15465	3.73729	2.13605	YDJ1	Predicted ORF in Assemblies 19, 20 and 21; heavy metal (cadmium) stress-induced	GO:0045047 protein targeting to ER | GO:0042026 protein refolding | GO:0006458 'de novo' protein folding | GO:0042493 response to drug | GO:0030433 ER-associated protein catabolic process | GO:0006626 protein targeting to mitochondrion |	GO:0051082 unfolded protein binding | GO:0001671 ATPase activator activity |	GO:0005829 cytosol | GO:0048471 perinuclear region of cytoplasm | GO:0005792 microsome |
orf19.350	1.57707	2.09783	1.63035	3.21751	2.36466	1.56523	PRE9	Alpha3 (C9) subunit of the 20S proteasome; transcription is regulated by Mig1p	GO:0006511 ubiquitin-dependent protein catabolic process | GO:0030447 filamentous growth |	GO:0004175 endopeptidase activity |	GO:0019773 proteasome core complex, alpha-subunit complex | GO:0005839 proteasome core complex | GO:0034515 proteasome storage granule |
orf19.123	1.79675	1.78239	1.37292	2.95247	2.63182	1.56		Predicted ORF in Assemblies 19, 20 and 21; possibly spurious ORF (Annotation Working Group prediction)	GO:0032512 regulation of protein phosphatase type 2B activity | GO:0032513 negative regulation of protein phosphatase type 2B activity | GO:0033554 cellular response to stress | GO:0019722 calcium-mediated signaling |	GO:0008597 calcium-dependent protein serine/threonine phosphatase regulator activity |
orf19.6582	1.71719	1.81139	1.457	2.95143	2.77866	1.4165	PRE10	Alpha7 (C8) subunit of the 20S proteasome; multiple phosphorylated residues; transcription is induced upon filamentous growth	GO:0006511 ubiquitin-dependent protein catabolic process |	GO:0004175 endopeptidase activity |	GO:0019773 proteasome core complex, alpha-subunit complex | GO:0005839 proteasome core complex | GO:0034515 proteasome storage granule |
orf19.1992	1.55304	1.55443	1.35678	2.47994	2.0621	1.33998	SIR2	Required for wild-type lifespan, asymmetric inheritance of oxidatively damaged proteins, rDNA silencing; regulates phenotypic switching in strain 3153A, not WO-1; partially functionally complements S. cerevisiae sir2 mutant mating defect	GO:0045595 regulation of cell differentiation | GO:0001319 inheritance of oxidatively modified proteins during replicative cell aging | GO:0000183 chromatin silencing at rDNA |	GO:0045129 NAD-independent histone deacetylase activity |	GO:0000118 histone deacetylase complex |
orf19.2481	2.18672	2.53148	2.01233	5.18406	3.86797	1.72546		Predicted ORF in Assemblies 19, 20 and 21; possibly spurious ORF (Annotation Working Group prediction)
orf19.6063	1.84911	2.33953	1.70964	4.23678	3.29948	1.60141	UBP6	Predicted ORF in Assemblies 19, 20 and 21; oxidative stress-induced via Cap1p	GO:0016579 protein deubiquitination |	GO:0004843 ubiquitin-specific protease activity |	GO:0005838 proteasome regulatory particle |
orf19.6674	1.37424	1.71309	1.33412	2.36443	2.00593	1.52581	BTS1	Decreased transcription is observed upon benomyl treatment	GO:0016114 terpenoid biosynthetic process |	GO:0004311 farnesyltranstransferase activity |	GO:0005739 mitochondrion |
orf19.3113	1.38453	1.67121	1.28376	2.31116	2.04357	1.4034		Predicted ORF in Assemblies 19, 20 and 21
orf19.1299	1.47305	2.13864	1.3651	2.92335	2.49616	1.54781	RPN6	Predicted ORF in Assemblies 19, 20 and 21; regulated by Gcn2p and Gcn4p	GO:0043248 proteasome assembly | GO:0006511 ubiquitin-dependent protein catabolic process |	GO:0004175 endopeptidase activity | GO:0005198 structural molecule activity |	GO:0008541 proteasome regulatory particle, lid subcomplex | GO:0034515 proteasome storage granule |
orf19.62	1.86353	2.52431	1.94298	3.78348	3.46939	2.21849		Predicted ORF from Assembly 19; merged with orf19.73 in Assembly 20
orf19.1402	1.58041	1.85962	1.42229	2.66307	2.53822	1.68145	CCT2	Predicted ORF in Assemblies 19, 20 and 21; protein detected by mass spec in exponential and stationary phase cultures	GO:0006457 protein folding | GO:0007010 cytoskeleton organization | GO:0006461 protein complex assembly |	GO:0051082 unfolded protein binding |	GO:0005856 cytoskeleton | GO:0005832 chaperonin-containing T-complex |
orf19.7128	1.35815	1.64941	1.26087	2.167	2.36438	1.3837	SYS1	Predicted ORF in Assemblies 19, 20 and 21; transcription is regulated by Mig1p	GO:0043001 Golgi to plasma membrane protein transport | GO:0016050 vesicle organization | GO:0006895 Golgi to endosome transport |		GO:0005802 trans-Golgi network | GO:0030173 integral to Golgi membrane |
orf19.3007.2	1.45922	1.73324	1.42463	2.55989	2.34245	1.23172		ORF Predicted by Annotation Working Group
orf19.4032	1.36968	1.74269	1.313	2.4283	2.3086	1.28885	RPN5	Predicted ORF in Assemblies 19, 20 and 21; macrophage/pseudohyphal-repressed	GO:0006511 ubiquitin-dependent protein catabolic process |	GO:0004175 endopeptidase activity |	GO:0008541 proteasome regulatory particle, lid subcomplex | GO:0034515 proteasome storage granule |
orf19.709	1.39476	1.77442	1.44688	2.82745	2.532	1.37127	PUP2	Alpha5 subunit of the 20S proteasome; macrophage/pseudohyphal-repressed; regulated by Gcn2p and Gcn4p; protein detected by mass spec in exponential and stationary phase cultures	GO:0006511 ubiquitin-dependent protein catabolic process | GO:0006950 response to stress |	GO:0004175 endopeptidase activity |	GO:0019773 proteasome core complex, alpha-subunit complex | GO:0005839 proteasome core complex | GO:0034515 proteasome storage granule |
orf19.3221	1.69163	2.42947	1.8068	5.71221	4.67127	1.25838	CPA2	Predicted ORF in Assemblies 19, 20 and 21; protein detected by mass spec in stationary phase cultures; transcription is upregulated in both intermediate and mature biofilms	GO:0006526 arginine biosynthetic process |	GO:0004088 carbamoyl-phosphate synthase (glutamine-hydrolyzing) activity |	GO:0005829 cytosol | GO:0005951 carbamoyl-phosphate synthase complex |
orf19.4230	1.51704	1.95349	1.83026	3.23584	2.95224	1.39523		Predicted ORF in Assemblies 19, 20 and 21; protein detected by mass spec in exponential and stationary phase cultures	GO:0006511 ubiquitin-dependent protein catabolic process | GO:0043248 proteasome assembly |	GO:0004175 endopeptidase activity |	GO:0019774 proteasome core complex, beta-subunit complex | GO:0034515 proteasome storage granule |
orf19.3054	1.39762	2.11606	1.42676	3.6081	2.4688	1.36117	RPN3	Predicted ORF in Assemblies 19, 20 and 21; amphotericin B repressed; oxidative stress-induced via Cap1p	GO:0006511 ubiquitin-dependent protein catabolic process |	GO:0004175 endopeptidase activity |	GO:0008541 proteasome regulatory particle, lid subcomplex |
orf19.1586	1.80411	1.75032	1.65503	4.38031	2.80675	1.4286	FGR22	Putative phosphatidylinositol-specific phospholipase C (PI-PLC); predicted type 2 membrane protein; no S. cerevisiae ortholog; role in, and regulated by, filamentation; no mouse systemic virulence role; almost identical to orf19.5797	GO:0030447 filamentous growth |	GO:0004435 phosphoinositide phospholipase C activity |	GO:0016021 integral to membrane |
orf19.213	1.42185	1.6166	1.43999	3.02813	2.04956	1.20791		Predicted ORF in Assemblies 19, 20 and 21	GO:0006511 ubiquitin-dependent protein catabolic process |		GO:0005634 nucleus | GO:0008541 proteasome regulatory particle, lid subcomplex | GO:0034515 proteasome storage granule |
orf19.3320	1.64657	1.61552	1.32293	5.45939	2.801	1.72861		Predicted ORF in Assemblies 19, 20 and 21; possibly spurious ORF (Annotation Working Group prediction)
orf19.2435	1.96804	1.93497	1.4351	8.46432	3.43836	1.62502	MSI3	Protein of the HSP70 family; antigenic; functional homolog of S. cerevisiae Msi3p; physically interacts (by 2-hybrid) with Cgr1p; transcriptionally regulated by iron; expression greater in high iron; farnesol downregulated in biofilm	GO:0042026 protein refolding |	GO:0016887 ATPase activity | GO:0051087 chaperone binding | GO:0042277 peptide binding | GO:0000774 adenyl-nucleotide exchange factor activity | GO:0005524 ATP binding |	GO:0005737 cytoplasm |
orf19.5942	1.25057	1.37883	1.16113	2.56864	2.04561	1.36492		Protein described as a zinc finger protein similar to S. cerevisiae Itt1p; downregulated upon adherence to polystyrene	GO:0006449 regulation of translational termination |
orf19.3329	1.36607	1.37617	1.21788	3.05337	2.25514	1.40217		Predicted ORF in Assemblies 19, 20 and 21	GO:0030148 sphingolipid biosynthetic process | GO:0019722 calcium-mediated signaling |	GO:0042392 sphingosine-1-phosphate phosphatase activity |	GO:0005783 endoplasmic reticulum |
orf19.446	1.46588	1.73644	1.25447	3.79992	2.66882	1.36383		Predicted ORF in Assemblies 19, 20 and 21; constitutive expression independent of MTL or white-opaque status; greater mRNA abundance observed in a cyr1 homozygous null mutant than in wild type; possibly spurious ORF (Annotation Working Group prediction)
orf19.5833	1.33897	1.45516	1.22936	2.71798	2.03745	1.26426		Predicted ORF in Assemblies 19, 20 and 21	GO:0015031 protein transport |		GO:0034098 Cdc48p-Npl4p-Ufd1p AAA ATPase complex |
orf19.5378	1.32546	1.59166	1.21638	3.20542	2.21004	1.33233	SCL1	Predicted ORF in Assemblies 19, 20 and 21; protein detected by mass spec in exponential and stationary phase cultures	GO:0006511 ubiquitin-dependent protein catabolic process |	GO:0004175 endopeptidase activity |	GO:0005739 mitochondrion | GO:0030686 90S preribosome | GO:0019773 proteasome core complex, alpha-subunit complex | GO:0034515 proteasome storage granule |
orf19.5793	1.33307	1.4689	1.17118	2.76394	2.42376	1.23311	PR26	Protein with similarity to proteasomal 26S regulatory subunit of S. cerevisiae, H. sapiens, Methanobacterium thermoautotrophicum (Archaebacterium)	GO:0006511 ubiquitin-dependent protein catabolic process |	GO:0004175 endopeptidase activity | GO:0016887 ATPase activity |	GO:0005838 proteasome regulatory particle | GO:0008540 proteasome regulatory particle, base subcomplex |
orf19.1359	1.62772	2.01654	1.23394	3.72968	3.38287	1.67098		Predicted ORF in Assemblies 19, 20 and 21
orf19.4678	1.57598	1.93737	1.16004	3.47594	2.76841	1.42308		Predicted ORF in Assemblies 19, 20 and 21
orf19.5755	1.8142	1.86607	1.24982	3.71188	3.07658	1.54099		Predicted ORF in Assemblies 19, 20 and 21	GO:0019220 regulation of phosphate metabolic process |	GO:0016538 cyclin-dependent protein kinase regulator activity |	GO:0000307 cyclin-dependent protein kinase holoenzyme complex |
orf19.6220	1.59783	1.62119	1.13082	3.4147	2.59062	1.51369		Predicted ORF in Assemblies 19, 20 and 21	GO:0006357 regulation of transcription from RNA polymerase II promoter |		GO:0030015 CCR4-NOT core complex |
orf19.413.1	1.96345	1.95982	1.03139	5.99559	4.66131	1.5964	RPS27A	Predicted ribosomal protein S27; ORF Predicted by Annotation Working Group	GO:0006412 translation |	GO:0003735 structural constituent of ribosome |	GO:0005737 cytoplasm |
orf19.1186	1.30638	1.59994	1.0869	2.08034	2.03084	1.2		Predicted ORF in Assemblies 19, 20 and 21; possibly spurious ORF (Annotation Working Group prediction)
orf19.7178	1.12493	1.59171	1.16339	2.32066	2.15236	1.2215	PRE5	Alpha6 subunit of the 20S proteasome; regulated by Gcn4p; induced in response to amino acid starvation (3-aminotriazole treatment)	GO:0006511 ubiquitin-dependent protein catabolic process |	GO:0004175 endopeptidase activity |	GO:0019773 proteasome core complex, alpha-subunit complex | GO:0005839 proteasome core complex | GO:0034515 proteasome storage granule |
orf19.544.1	1.16062	1.56113	1.21865	2.22382	2.10796	1.31023	PRE6	Protein described as alpha-4 subunit of proteasome; reported as macrophage-induced protein and macrophage/pseudohyphal-repressed gene; regulated by Gcn2p and Gcn4p; removed from/reinstated in Assembly 20 (see Locus History)	GO:0006511 ubiquitin-dependent protein catabolic process |	GO:0008233 peptidase activity |	GO:0005739 mitochondrion | GO:0019773 proteasome core complex, alpha-subunit complex | GO:0034515 proteasome storage granule |
orf19.6991	1.14876	1.58616	1.22391	2.45471	2.01301	1.36435	PRE3	Protein described as beta-1 subunit of proteasome; macrophage-induced protein; regulated by Gcn2p and Gcn4p	GO:0006511 ubiquitin-dependent protein catabolic process | GO:0006950 response to stress |	GO:0004175 endopeptidase activity |	GO:0019774 proteasome core complex, beta-subunit complex | GO:0034515 proteasome storage granule |
orf19.6781	1.74864	1.81151	1.30611	2.73136	2.61266	1.2021		Putative transcription factor with zinc finger DNA-binding motif	GO:0006355 regulation of transcription, DNA-dependent |	GO:0003700 transcription factor activity |
orf19.3132	1.6409	1.49529	1.17277	2.00825	2.17768	1.02484		Predicted ORF in Assemblies 19, 20 and 21; induced by nitric oxide	GO:0006882 cellular zinc ion homeostasis |	GO:0015491 cation |	GO:0005634 nucleus | GO:0016020 membrane | GO:0005783 endoplasmic reticulum |
orf19.1406	1.71275	2.24879	1.21954	2.60251	2.28756	1.21394		Predicted ORF in Assemblies 19, 20 and 21
orf19.6391	1.4235	1.67372	0.938578	11.77	5.98693	2.84464		Increased transcription is observed in an azole-resistant strain that overexpresses MDR1
orf19.4802	1.09688	1.24771	1.04342	3.67173	3.0364	2.01867	FTH1	Protein not essential for viability; similar to S. cerevisiae Fth1p (putative high affinity iron transporter for intravacuolar stores of iron); repressed by Sfu1p, amphotericin B, caspofungin; induced by alkaline pH, ciclopirox olamine	GO:0006897 endocytosis | GO:0006827 high-affinity iron ion transport |		GO:0000329 fungal-type vacuole membrane |
orf19.7257	1.16221	1.23363	1.05852	3.34505	2.87966	1.4804		Predicted ORF in Assemblies 19, 20 and 21	GO:0006298 mismatch repair | GO:0007131 reciprocal meiotic recombination |		GO:0032390 MutLbeta complex |
orf19.5934	1.05664	1.47874	1.25305	3.2806	2.60466	1.96066		Predicted ORF in Assemblies 19, 20 and 21	GO:0007004 telomere maintenance via telomerase | GO:0007131 reciprocal meiotic recombination | GO:0007064 mitotic sister chromatid cohesion | GO:0000018 regulation of DNA recombination |	GO:0003917 DNA topoisomerase type I activity |	GO:0031422 RecQ helicase-Topo III complex |
orf19.7520	1.05701	1.44449	1.20645	3.29996	2.86683	1.85443	POT1	Putative peroxisomal 3-oxoacyl CoA thiolase; transcription is regulated by Nrg1p and Mig1p; farnesol regulated	GO:0006635 fatty acid beta-oxidation |	GO:0003988 acetyl-CoA C-acyltransferase activity |	GO:0005782 peroxisomal matrix |
orf19.7119	1.08264	1.39195	1.05312	2.10588	2.03488	1.60073		Predicted ORF in Assemblies 19, 20 and 21	GO:0006367 transcription initiation from RNA polymerase II promoter | GO:0000717 nucleotide-excision repair, DNA duplex unwinding | GO:0007070 negative regulation of transcription from RNA polymerase II promoter, mitotic | GO:0033683 nucleotide-excision repair, DNA incision | GO:0010525 regulation of transposition, RNA-mediated | GO:0006366 transcription from RNA polymerase II promoter | GO:00000…	GO:0016251 general RNA polymerase II transcription factor activity | GO:0043141 ATP-dependent 5'-3' DNA helicase activity | GO:0003684 damaged DNA binding |	GO:0000443 SSL2-core TFIIH complex portion of holo TFIIH complex | GO:0000442 SSL2-core TFIIH complex portion of NEF3 complex | GO:0000439 core TFIIH complex |
orf19.4774	1.28205	1.51441	1.21188	3.57865	2.26851	1.94601	AOX1	Alternative oxidase; low abundance; constitutively expressed; one of two isoforms (Aox1p and Aox2p); involved in a cyanide-resistant respiratory pathway present in plants, protists, and some fungi, although absent from S. cerevisiae	GO:0045333 cellular respiration | GO:0009060 aerobic respiration |	GO:0009916 alternative oxidase activity |	GO:0005743 mitochondrial inner membrane | GO:0005739 mitochondrion |
orf19.2515	1.30221	1.65398	1.65108	7.19383	4.55909	1.81685		Predicted ORF in Assemblies 19, 20 and 21
orf19.2344	1.26011	2.16954	2.1738	16.7703	15.8714	2.25334	ASR1	Protein described as similar to heat shock proteins; transcription regulated by cAMP, osmotic stress, ciclopirox olamine, ketoconazole; negatively regulated by Cyr1p, Ras1p; shows colony morphology-related gene regulation by Ssn6p
orf19.3593	1.11537	1.3288	1.17147	2.40424	2.39104	1.32166	RPT6	Predicted ORF in Assemblies 19, 20 and 21; transcription is regulated by Mig1p; regulated by Gcn2p and Gcn4p	GO:0006511 ubiquitin-dependent protein catabolic process |	GO:0004175 endopeptidase activity | GO:0016887 ATPase activity |	GO:0005634 nucleus | GO:0008540 proteasome regulatory particle, base subcomplex | GO:0034515 proteasome storage granule |
orf19.7215.3	0.970402	1.39788	1.50639	3.05549	2.47546	1.26393		ORF Predicted by Annotation Working Group	GO:0006461 protein complex assembly | GO:0042026 protein refolding |	GO:0051082 unfolded protein binding | GO:0051087 chaperone binding |	GO:0005759 mitochondrial matrix |
orf19.1234	0.982797	1.46336	1.24612	3.28835	3.73493	1.7329	FGR6-10	Protein lacking an ortholog in S. cerevisiae; member of a family encoded by FGR6-related genes in the RB2 repeat sequence; transposon mutation affects filamentous growth	GO:0030447 filamentous growth |
orf19.7258	0.81019	1.41563	1.05413	3.43276	3.5057	1.68601	DDI1	Predicted ORF in Assemblies 19, 20 and 21; macrophage/pseudohyphal-repressed	GO:0016192 vesicle-mediated transport | GO:0006511 ubiquitin-dependent protein catabolic process |	GO:0000149 SNARE binding |	GO:0005886 plasma membrane |
orf19.4956	1.0002	1.59671	1.03458	2.78288	2.701	1.40441	RPN1	Predicted ORF in Assemblies 19, 20 and 21; regulated by Gcn2p and Gcn4p	GO:0006511 ubiquitin-dependent protein catabolic process |	GO:0004175 endopeptidase activity | GO:0030674 protein binding, bridging |	GO:0005634 nucleus | GO:0008540 proteasome regulatory particle, base subcomplex | GO:0034515 proteasome storage granule | GO:0005783 endoplasmic reticulum |
orf19.6083	1.06325	1.11229	1.24421	2.31538	2.58076	1.71012		Predicted ORF in Assemblies 19, 20 and 21
orf19.3501	1.12455	1.3949	1.2003	3.05292	3.73733	2.78114		Predicted ORF in Assemblies 19, 20 and 21; Hog1p-downregulated	GO:0030011 maintenance of cell polarity |		GO:0043332 mating projection tip | GO:0005934 cellular bud tip | GO:0005737 cytoplasm | GO:0005935 cellular bud neck | GO:0000131 incipient cellular bud site |
orf19.842	1.04965	1.36562	1.25235	2.04698	2.25706	2.00007	ASR3	Gene regulated by cAMP and by osmotic stress; greater mRNA abundance observed in a cyr1 or ras1 homozygous null mutant than in wild type; possibly spurious ORF (Annotation Working Group prediction)
orf19.5110	1.16581	1.16774	1.07786	2.74944	2.6314	2.26254	OPY2	Predicted ORF in Assemblies 19, 20 and 21	GO:0007231 osmosensory signaling pathway | GO:0000751 cell cycle arrest in response to pheromone |		GO:0000324 fungal-type vacuole | GO:0016021 integral to membrane | GO:0005886 plasma membrane |
orf19.4593	1.31116	1.12093	1.11396	2.64725	2.25947	1.80719	RGA2	Putative GTPase-activating protein (GAP) for Rho-type GTPase Cdc42p; involved in cell signaling pathways that control cell polarity; similar to S. cerevisiae Rga2p; induced upon low-level peroxide stress	GO:0000753 cellular morphogenesis during conjugation with cellular fusion | GO:0030448 hyphal growth | GO:0007264 small GTPase mediated signal transduction | GO:0030010 establishment of cell polarity | GO:0007118 budding cell apical bud growth | GO:0007124 pseudohyphal growth | GO:0000750 pheromone-dependent signal transduction involved in conjugation with cellular fusion | GO:0007015 actin filam…	GO:0004871 signal transducer activity | GO:0005100 Rho GTPase activator activity |	GO:0000142 cellular bud neck contractile ring | GO:0030427 site of polarized growth | GO:0032177 cellular bud neck split septin rings |
orf19.742	0.935819	1.40249	1.4274	2.07153	2.33097	1.48759	ALD6	Putative aldehyde dehydrogenase; expression is regulated upon white-opaque switching; protein detected by mass spec in stationary phase cultures; transcription is upregulated in both intermediate and mature biofilms	GO:0006067 ethanol metabolic process |	GO:0004029 aldehyde dehydrogenase (NAD) activity |	GO:0005739 mitochondrion |
orf19.5278	0.830328	1.59989	1.62313	2.23946	2.52847	1.59841		Predicted ORF in Assemblies 19, 20 and 21			GO:0005739 mitochondrion |
orf19.7668	0.833069	1.68337	2.00478	5.22721	4.9568	2.50715	MAL2	Alpha-glucosidase that hydrolyzes sucrose; required for sucrose utilization; transcriptionally regulated by Suc1p; expression induced by maltose, repressed by glucose; transposon mutation affects filamentous growth; upregulated in RHE model	GO:0005987 sucrose catabolic process | GO:0030447 filamentous growth | GO:0000025 maltose catabolic process |	GO:0004575 sucrose alpha-glucosidase activity | GO:0004574 oligo-1,6-glucosidase activity |	GO:0005576 extracellular region | GO:0005739 mitochondrion | GO:0005840 ribosome |
orf19.5250	0.802092	1.27587	1.52221	2.29572	3.32312	1.8081		Predicted ORF in Assemblies 19, 20 and 21
orf19.5614	1.11063	2.19057	2.2058	5.60467	4.41779	1.87249		Predicted ORF in Assemblies 19, 20 and 21	GO:0006260 DNA replication | GO:0006401 RNA catabolic process | GO:0007047 cell wall organization |	GO:0004523 ribonuclease H activity |	GO:0005623 cell |
orf19.5823	1.05182	1.7404	1.55569	2.31867	2.0634	1.23472	SGT2	Protein abundance is affected by URA3 expression in the CAI-4 strain background; transcription is regulated by Mig1p	GO:0009408 response to heat |		GO:0005737 cytoplasm |
orf19.5262	1.37693	2.53364	1.36141	9.80786	4.43893	0.83502		Predicted ORF in Assemblies 19, 20 and 21
orf19.3351	1.33798	2.15537	1.36047	4.69596	2.56919	0.915883		Predicted ORF in Assemblies 19, 20 and 21
orf19.589	1.06295	1.85295	1.05151	3.04183	2.19	0.912827	VPS21	Late endosomal Rab small monomeric GTPase involved in transport of endocytosed proteins to the vacuole; involved in filamentous growth and virulence	GO:0006897 endocytosis | GO:0006623 protein targeting to vacuole | GO:0009405 pathogenesis | GO:0007038 endocytosed protein transport to vacuole |	GO:0005525 GTP binding | GO:0003924 GTPase activity |	GO:0005741 mitochondrial outer membrane | GO:0005770 late endosome |
orf19.2989	1.79692	2.78816	1.46445	6.3923	4.85675	1.00739		Predicted ORF in Assemblies 19, 20 and 21	GO:0009436 glyoxylate catabolic process |	GO:0047964 glyoxylate reductase activity |	GO:0005739 mitochondrion | GO:0005634 nucleus |
orf19.5943	1.30684	1.96776	1.38504	3.02892	2.312	1.0561		Predicted ORF in Assemblies 19, 20 and 21	GO:0007031 peroxisome organization |		GO:0005778 peroxisomal membrane |
orf19.89	1.5785	1.81211	1.40203	4.16426	2.83165	1.0148		Predicted ORF in Assemblies 19, 20 and 21	GO:0016560 protein import into peroxisome matrix, docking |	GO:0005053 peroxisome matrix targeting signal-2 binding |	GO:0005782 peroxisomal matrix | GO:0005829 cytosol | GO:0005777 peroxisome |
orf19.7570	1.53033	1.80628	1.55949	4.2779	2.78915	1.13295		Putative transcription factor with zinc cluster DNA-binding motif; has similarity to S. cerevisiae Uga3p, which is a transcription factor involved in the regulation of gamma-aminobutyrate metabolism genes	GO:0006350 transcription | GO:0006355 regulation of transcription, DNA-dependent | GO:0019740 nitrogen utilization | GO:0045893 positive regulation of transcription, DNA-dependent | GO:0009450 gamma-aminobutyric acid catabolic process | GO:0006357 regulation of transcription from RNA polymerase II promoter |	GO:0003700 transcription factor activity | GO:0043565 sequence-specific DNA binding | GO:0003704 specific RNA polymerase II transcription factor activity |
orf19.7469	1.51605	2.56831	1.98347	6.87823	3.05515	0.888651	ARG1	Similar to argininosuccinate synthase; enzyme of arginine biosynthesis; increased transcription is observed upon benomyl treatment; regulated by Gcn4p, Rim101p; induced in response to amino acid starvation (3-aminotriazole treatment)	GO:0006526 arginine biosynthetic process | GO:0000052 citrulline metabolic process | GO:0000053 argininosuccinate metabolic process |	GO:0004055 argininosuccinate synthase activity |	GO:0005829 cytosol |
orf19.6668	1.52344	1.99813	1.6532	4.323	2.92495	0.850055		Predicted ORF in Assemblies 19, 20 and 21	GO:0045184 establishment of protein localization | GO:0030433 ER-associated protein catabolic process |	GO:0005515 protein binding |	GO:0005739 mitochondrion | GO:0030176 integral to endoplasmic reticulum membrane | GO:0000837 Doa10p ubiquitin ligase complex |
orf19.3417	1.1094	1.46474	1.2859	2.65443	2.00572	1.03733	ACF2	Putative endo-1,3-beta-glucanase; fungal-specific (no human or murine homolog)	GO:0030036 actin cytoskeleton organization |	GO:0004338 glucan 1,3-beta-glucosidase activity | GO:0042973 glucan endo-1,3-beta-D-glucosidase activity |	GO:0005622 intracellular |
orf19.2690	1.10806	1.59242	1.46651	2.9818	2.1764	1.12299		Predicted ORF in Assemblies 19, 20 and 21	GO:0008053 mitochondrial fusion | GO:0000002 mitochondrial genome maintenance |	GO:0003924 GTPase activity |	GO:0005739 mitochondrion | GO:0005741 mitochondrial outer membrane | GO:0005758 mitochondrial intermembrane space |
orf19.2356	1.28325	1.40325	1.44022	3.75717	2.54752	0.947357	CRZ2	Putative transcription factor; zinc finger; similar to S. cerevisiae Crz1p; homozygous crz1, not crz2, null mutation suppresses fluconazole resistance of homozygous cka2 null (defective in CK2 kinase ); Rim101p-downregulated at pH 8	GO:0006355 regulation of transcription, DNA-dependent | GO:0010447 response to acidity |	GO:0003700 transcription factor activity |
orf19.3438	1.43777	1.40393	1.48478	3.54775	2.77334	1.16581		Predicted ORF in Assemblies 19, 20 and 21	GO:0006986 response to unfolded protein | GO:0006457 protein folding | GO:0030433 ER-associated protein catabolic process |	GO:0051087 chaperone binding |	GO:0005788 endoplasmic reticulum lumen |
orf19.4788	1.29787	1.59667	1.16616	2.66118	3.07243	1.12342	ARG5,6	Arginine biosynthetic enzyme activities; in S. cerevisiae, processed into distinct polypeptides with acetylglutamate kinase (Arg6p) activity and acetylglutamate-phosphate reductase (Arg5p) activity; Gcn4p regulated; alkaline downregulated
orf19.675	1.54616	2.09468	1.78055	3.20015	3.73718	0.959941		Similar to cell wall proteins; induced in core stress response, core caspofungin response; iron-regulated; amphotericin B induced; regulated by Cyr1p, Ssn6p; possibly spurious ORF (Annotation Working Group prediction)
orf19.5816	0.955218	1.43004	1.55911	3.64547	2.19059	0.945235	EBP7	Predicted ORF in Assemblies 19, 20 and 21; mutation confers hypersensitivity to toxic ergosterol analog; oxidative stress-induced via Cap1p	GO:0042493 response to drug |	GO:0003959 NADPH dehydrogenase activity |
orf19.7210	0.934792	1.35036	1.25735	2.84178	2.32528	0.835728		Predicted ORF in Assemblies 19, 20 and 21			GO:0005634 nucleus | GO:0005737 cytoplasm |
orf19.5686	0.854421	1.34757	1.38643	4.14952	4.01936	0.711685		Predicted ORF in Assemblies 19, 20 and 21
orf19.4430	2.69522	1.71522	1.07343	2.67822	2.15471	1.06838		Predicted ORF in Assemblies 19, 20 and 21			GO:0005634 nucleus | GO:0005737 cytoplasm |
orf19.813	4.95184	3.2275	1.0735	10.3278	5.82706	1.7982		Predicted ORF in Assemblies 19, 20 and 21; not essential for viability; oxidative stress-induced via Cap1p; similar to S. cerevisiae Vhs3p, which is a putative phosphopantothenoylcysteine decarboxylase
orf19.6783	1.68846	1.30313	0.934096	2.04478	2.05508	1.46867		Predicted ORF in Assemblies 19, 20 and 21	GO:0006886 intracellular protein transport |		GO:0016020 membrane | GO:0005737 cytoplasm | GO:0005886 plasma membrane |
orf19.6306	2.06429	2.49081	1.67756	3.04109	1.94763	1.59983		Trimethylaminobutyraldehyde dehydrogenase, the third enzyme of the carnitine biosynthesis pathway	GO:0006067 ethanol metabolic process | GO:0045329 carnitine biosynthetic process |	GO:0004029 aldehyde dehydrogenase (NAD) activity |	GO:0005739 mitochondrion |
orf19.4012	2.81378	4.30116	1.98554	5.54206	2.78134	1.55139	PCL5	Protein similar to S. cerevisiae Pcl5p and other cyclins for Pho85p kinase; Gcn4p-induced; suppresses toxicity of C. albicans Gcn4p overproduction in S. cerevisiae via increased Pho85p-dependent phosphorylation and degradation of Gcn4p	GO:0030448 hyphal growth | GO:0030447 filamentous growth | GO:0007049 cell cycle |	GO:0016538 cyclin-dependent protein kinase regulator activity |	GO:0000307 cyclin-dependent protein kinase holoenzyme complex |
orf19.7602	3.24477	3.58656	2.4389	8.1737	2.37274	1.43974		Predicted ORF in Assemblies 19, 20 and 21; heavy metal (cadmium) stress-induced; oxidative stress-induced via Cap1p	GO:0006950 response to stress | GO:0006457 protein folding |	GO:0001671 ATPase activator activity | GO:0051087 chaperone binding |	GO:0005737 cytoplasm |
orf19.5797	2.44792	2.18559	2.25736	6.37129	3.35982	1.69864	PI-PLC	Phosphatidylinositol (PtdIns)-specific phospholipase C (PI-PLC); predicted type 2 membrane protein; role in, and regulated by, filamentation, Nrg1p and Tup1p; no mouse systemic virulence role; orf19.5797 and orf19.1586 are almost identical	GO:0030447 filamentous growth |	GO:0004435 phosphoinositide phospholipase C activity |	GO:0016021 integral to membrane |
orf19.6479	1.71698	1.846	1.6443	2.94879	2.11301	1.28596		Predicted ORF in Assemblies 19, 20 and 21	GO:0006906 vesicle fusion | GO:0006904 vesicle docking during exocytosis |	GO:0000149 SNARE binding |	GO:0030478 actin cap | GO:0005934 cellular bud tip | GO:0005935 cellular bud neck | GO:0005886 plasma membrane |
orf19.7604	2.03841	1.88459	1.67475	3.31416	1.93368	1.51245		Predicted ORF in Assemblies 19, 20 and 21	GO:0006888 ER to Golgi vesicle-mediated transport | GO:0032313 regulation of Rab GTPase activity |		GO:0030008 TRAPP complex |
orf19.6604	2.03311	2.41689	2.03555	4.77076	2.30816	1.66446		Predicted ORF in Assemblies 19, 20 and 21; greater mRNA abundance observed in a cyr1 homozygous null mutant than in wild type
orf19.5752	2.26335	2.90378	2.32102	4.30183	2.46971	1.20318		Predicted ORF in Assemblies 19, 20 and 21	GO:0031146 SCF-dependent proteasomal ubiquitin-dependent protein catabolic process |	GO:0004842 ubiquitin-protein ligase activity |	GO:0019005 SCF ubiquitin ligase complex |
orf19.1764	2.13666	2.47197	1.84964	3.43621	2.03529	1.17983		Predicted ORF in Assemblies 19, 20 and 21
orf19.635	1.7628	2.1503	1.61373	3.26693	1.96723	0.994581		Predicted ORF in Assemblies 19, 20 and 21; possibly spurious ORF (Annotation Working Group prediction); transcription is induced in response to alpha pheromone in SpiderM medium
orf19.2054	2.1429	2.51596	1.81387	4.3842	2.43587	1.13459	FGR15	Putative transcription factor with zinc finger DNA-binding motif; lacks an ortholog in S. cerevisiae; transposon mutation affects filamentous growth; caspofungin induced; mutation causes marginal increase in caspofungin sensitivity	GO:0030447 filamentous growth | GO:0006355 regulation of transcription, DNA-dependent |	GO:0003700 transcription factor activity |
orf19.916	1.90505	2.27288	1.46937	3.03521	2.0329	1.09639		Predicted ORF in Assemblies 19, 20 and 21			GO:0000324 fungal-type vacuole |
orf19.882	3.87559	5.70306	3.46329	11.4914	5.31656	0.843385	HSP78	Protein described as a heat-shock protein; transcriptionally regulated by macrophage response; transcription is regulated by Nrg1p, Mig1p, Gcn2p, Gcn4p, Mnl1p; heavy metal (cadmium) stress-induced	GO:0006461 protein complex assembly | GO:0000002 mitochondrial genome maintenance | GO:0010892 positive regulation of mitochondrial translation in response to stress | GO:0050821 protein stabilization | GO:0042026 protein refolding | GO:0034605 cellular response to heat | GO:0043335 protein unfolding | GO:0030150 protein import into mitochondrial matrix |	GO:0004176 ATP-dependent peptidase activity | GO:0051787 misfolded protein binding | GO:0016887 ATPase activity |	GO:0005759 mitochondrial matrix |
orf19.429	2.6224	3.53375	2.45795	5.36578	3.86572	1.14541		Predicted ORF in Assemblies 19, 20 and 21; repressed by nitric oxide	GO:0016076 snRNA catabolic process | GO:0016075 rRNA catabolic process | GO:0031126 snoRNA 3'-end processing | GO:0034475 U4 snRNA 3'-end processing | GO:0000292 RNA fragment catabolic process | GO:0043630 ncRNA polyadenylation during polyadenylation-dependent ncRNA catabolic process | GO:0016078 tRNA catabolic process | GO:0031047 gene silencing by RNA | GO:0016077 snoRNA catabolic process | GO:…	GO:0051575 5'-deoxyribose-5-phosphate lyase activity | GO:0004652 polynucleotide adenylyltransferase activity |	GO:0031499 TRAMP complex |
orf19.6387	4.26278	5.37972	4.04747	8.96603	5.72153	1.03372	HSP104	Functional homolog of S. cerevisiae Hsp104p; has chaperone and prion propagation activity in S. cerevisiae; guanidine-insensitive; heat shock/stress induced; downregulated in biofilm upon treatment with farnesol; no human or murine homolog	GO:0051085 chaperone mediated protein folding requiring cofactor | GO:0009408 response to heat | GO:0001319 inheritance of oxidatively modified proteins during replicative cell aging | GO:0070414 trehalose metabolism in response to heat stress | GO:0070389 chaperone cofactor-dependent protein refolding | GO:0034975 protein folding in endoplasmic reticulum | GO:0043335 protein unfolding | GO:00703…	GO:0042623 ATPase activity, coupled | GO:0051082 unfolded protein binding | GO:0043531 ADP binding | GO:0051087 chaperone binding | GO:0005524 ATP binding |	GO:0009986 cell surface | GO:0005634 nucleus | GO:0005737 cytoplasm |
orf19.4525	1.82609	1.92166	1.35719	2.96507	2.18341	1.07878		Predicted ORF in Assemblies 19, 20 and 21			GO:0005783 endoplasmic reticulum |
orf19.4677	1.86392	2.41649	1.6306	4.5165	2.97228	1.24049		Putative protein of unknown function, transcription is upregulated in clinical isolates from HIV+ patients with oral candidiasis; predicted ORF in Assemblies 19, 20 and 21
orf19.5402	1.73696	1.82024	1.50069	2.43364	2.30712	1.08772		ORF Predicted by Annotation Working Group
orf19.3237	1.68817	2.08582	1.53294	2.50844	2.26988	1.1623		Predicted ORF in Assemblies 19, 20 and 21	GO:0000209 protein polyubiquitination | GO:0006513 protein monoubiquitination |	GO:0004842 ubiquitin-protein ligase activity |	GO:0005739 mitochondrion |
orf19.2846	1.46395	1.75749	1.83841	2.33557	2.20925	1.21699		Predicted ORF in Assemblies 19, 20 and 21; induced in core caspofungin response; transcription regulated upon yeast-hyphal switch
orf19.7214	1.57215	1.65866	1.84165	2.28314	2.11237	1.1173		Similar to glucan 1,3-beta-glucosidase; regulated by Nrg1p, Tup1p; possibly regulated by Tac1p; induced upon biofilm formation; induced by nitric oxide; induced during cell wall regeneration; detected by mass spec in stationary phase			GO:0005737 cytoplasm |
orf19.4046	1.39293	2.01475	1.62285	2.287	2.11974	1.25581		Putative transcription factor containing a Zn(2)-Cys(6) binuclear cluster; predicted ORF in Assemblies 19, 20 and 21
orf19.5876	2.05099	3.70939	2.55388	4.57188	3.50027	1.57067		Predicted ORF in Assemblies 19, 20 and 21; greater mRNA abundance observed in a cyr1 homozygous null mutant than in wild type; transcription is induced in response to alpha pheromone in SpiderM medium
orf19.5749	2.19955	3.28867	2.78403	5.83825	3.70813	1.3778	SBA1	Similar to co-chaperones; transcriptionally regulated by iron; expression greater in high iron; farnesol-, heavy metal (cadmium) stress-induced; protein level decreased in stationary phase cultures	GO:0006457 protein folding | GO:0032212 positive regulation of telomere maintenance via telomerase | GO:0051972 regulation of telomerase activity |	GO:0051087 chaperone binding |	GO:0005634 nucleus | GO:0005737 cytoplasm |
orf19.3292	1.40795	2.31349	1.61389	2.63934	2.5316	1.24388		Predicted ORF in Assemblies 19, 20 and 21	GO:0006979 response to oxidative stress |	GO:0000318 protein-methionine-R-oxide reductase activity | GO:0033743 peptide-methionine (R)-S-oxide reductase activity |
orf19.5440	1.32108	1.98175	1.45958	2.36134	2.2378	1.11932	RPT2	Predicted ORF in Assemblies 19, 20 and 21; oxidative stress-induced via Cap1p	GO:0006511 ubiquitin-dependent protein catabolic process |	GO:0004175 endopeptidase activity | GO:0016887 ATPase activity |	GO:0005634 nucleus | GO:0008540 proteasome regulatory particle, base subcomplex |
orf19.6979	1.96163	3.09624	1.98546	3.41517	3.62876	1.70358		Predicted ORF in Assemblies 19, 20 and 21; intron in 5'-UTR	GO:0019836 hemolysis by symbiont of host erythrocytes | GO:0030026 cellular manganese ion homeostasis | GO:0007005 mitochondrion organization |		GO:0000329 fungal-type vacuole membrane |
orf19.7605	1.6138	2.48444	1.95817	3.27982	3.20039	1.65021	PUP1	Predicted ORF in Assemblies 19, 20 and 21; macrophage/pseudohyphal-repressed	GO:0006511 ubiquitin-dependent protein catabolic process |	GO:0004175 endopeptidase activity |	GO:0019774 proteasome core complex, beta-subunit complex | GO:0034515 proteasome storage granule |
orf19.1949	1.32015	2.09955	1.36971	1.94758	2.08446	1.3431	VPS1	Protein described as a dynamin-family GTPase-related protein; induced upon adherence to polystyrene; regulated by Gcn2p and Gcn4p	GO:0030447 filamentous growth | GO:0042710 biofilm formation | GO:0006623 protein targeting to vacuole | GO:0045053 protein retention in Golgi apparatus | GO:0030036 actin cytoskeleton organization | GO:0007031 peroxisome organization |	GO:0003924 GTPase activity |	GO:0005777 peroxisome | GO:0005624 membrane fraction | GO:0005741 mitochondrial outer membrane |
orf19.94	2.79832	4.26931	4.03167	7.85875	3.92902	2.48114		Predicted ORF in Assemblies 19, 20 and 21
orf19.4914	1.67642	1.87648	2.02959	2.73725	2.39693	1.63109		Predicted ORF in Assemblies 19, 20 and 21
orf19.3226	2.39211	2.54163	1.74569	3.93296	3.58799	1.90624		Predicted ORF in Assemblies 19, 20 and 21	GO:0032366 intracellular sterol transport |		GO:0000328 fungal-type vacuole lumen |
orf19.1304	2.15893	2.44541	1.9361	3.3002	3.06944	1.94009		Predicted ORF in Assemblies 19, 20 and 21	GO:0031126 snoRNA 3'-end processing | GO:0000467 exonucleolytic trimming to generate mature 3'-end of 5.8S rRNA from tricistronic rRNA transcript (SSU-rRNA, 5.8S rRNA, LSU-rRNA) | GO:0034475 U4 snRNA 3'-end processing | GO:0034427 nuclear-transcribed mRNA catabolic process, exonucleolytic, 3'-5' | GO:0000292 RNA fragment catabolic process |		GO:0000177 cytoplasmic exosome (RNase complex) | GO:0000176 nuclear exosome (RNase complex) |
orf19.4177	2.5594	2.98971	1.88035	3.21363	3.0439	2.06244	HIS5	Predicted ORF in Assemblies 19, 20 and 21; Gcn4p-regulated	GO:0000105 histidine biosynthetic process |	GO:0004400 histidinol-phosphate transaminase activity |	GO:0005623 cell |
orf19.3396	2.27165	2.81784	2.39908	3.2922	2.80749	1.77645	HCH1	Protein not essential for viability; regulated by Gcn4p; induced in response to amino acid starvation (3-aminotriazole treatment); similar to S. cerevisiae Hch1p, which is a regulator of heat shock protein Hsp90p	GO:0006950 response to stress | GO:0006457 protein folding |	GO:0001671 ATPase activator activity | GO:0051087 chaperone binding |	GO:0005634 nucleus | GO:0005737 cytoplasm |
orf19.2755	1.77526	2.4606	1.7881	2.43487	2.24157	1.60043		Predicted ORF in Assemblies 19, 20 and 21	GO:0006511 ubiquitin-dependent protein catabolic process |	GO:0004175 endopeptidase activity |	GO:0019774 proteasome core complex, beta-subunit complex |
orf19.6272	2.53322	2.84247	1.96323	2.94822	1.59705	1.01827		Predicted ORF in Assemblies 19, 20 and 21; regulated by Gcn2p and Gcn4p	GO:0016579 protein deubiquitination |	GO:0004843 ubiquitin-specific protease activity |	GO:0005737 cytoplasm |
orf19.834	1.76947	2.00386	1.48842	2.21257	1.51689	1.06113		Predicted ORF in Assemblies 19, 20 and 21	GO:0030433 ER-associated protein catabolic process |	GO:0030246 carbohydrate binding |	GO:0005788 endoplasmic reticulum lumen |
orf19.2301	1.78614	2.11771	1.74577	2.39723	1.43161	1.24504		Predicted ORF in Assemblies 19, 20 and 21	GO:0070682 proteasome regulatory particle assembly |		GO:0005829 cytosol | GO:0005634 nucleus |
orf19.93	3.65246	7.14464	4.78053	5.10601	4.44362	1.92101		Predicted ORF in Assemblies 19, 20 and 21; shows colony morphology-related gene regulation by Ssn6p	GO:0044114 development of symbiont in host |		GO:0005634 nucleus | GO:0005758 mitochondrial intermembrane space |
orf19.3192	2.70133	2.83525	2.57643	2.7726	2.32521	1.56046	STI1	Protein that interacts with Cdc37p and Crk1p in two-hybrid system; may be involved in Cdc37p chaperone activity; biofilm induced; soluble protein in hyphae; protein detected by mass spec in exponential and stationary phase cultures	GO:0006461 protein complex assembly | GO:0006457 protein folding |	GO:0051879 Hsp90 protein binding | GO:0030544 Hsp70 protein binding |	GO:0005625 soluble fraction | GO:0005737 cytoplasm |
orf19.3507	2.50741	3.30804	2.93755	3.49967	2.15428	1.91232	MCR1	Protein described as NADH-cytochrome-b5 reductase; soluble protein in hyphae; biofilm induced; alkaline downregulated; ketoconazole or flucytosine induced, farnesol-induced	GO:0006979 response to oxidative stress | GO:0006696 ergosterol biosynthetic process |	GO:0004128 cytochrome-b5 reductase activity |	GO:0005625 soluble fraction | GO:0031307 integral to mitochondrial outer membrane | GO:0005758 mitochondrial intermembrane space |
orf19.4936.1	1.61742	4.74714	3.19736	6.41453	2.52939	1.47491		ORF added to Assembly 21 based on comparative genome analysis
orf19.428	1.33809	1.75549	2.01972	3.48119	1.76296	1.25285		Predicted ORF in Assemblies 19, 20 and 21; induced during planktonic growth		GO:0004672 protein kinase activity |
orf19.1331	1.28146	1.89214	2.01287	4.74678	2.15143	1.05758	HSM3	Protein not essential for viability; similar to S. cerevisiae Hsm3p, which may be involved in DNA mismatch repair	GO:0006298 mismatch repair |
orf19.7010	2.36309	2.52858	1.75314	4.08893	1.01786	1.22808		Predicted ORF in Assemblies 19, 20 and 21			GO:0005737 cytoplasm |
orf19.3433	1.60548	2.42255	1.38752	3.38761	1.44158	1.34194	OYE23	Putative NAPDH dehydrogenase; induced by nitric oxide, benomyl; oxidative stress-induced via Cap1p; fungal-specific (no human or murine homolog)		GO:0003959 NADPH dehydrogenase activity |
orf19.3526	11.0979	5.41856	2.93166	14.7329	3.98891	0.801749	ITR1	Inositol transporter required for uptake of exogenous inositol; major facilitator superfamily; 12 probable transmembrane motifs; expressed in rich medium with 2% glucose; fluconazole, caspofungin downregulated	GO:0015758 glucose transport | GO:0015798 myo-inositol transport | GO:0008643 carbohydrate transport |	GO:0005355 glucose transmembrane transporter activity | GO:0005365 myo-inositol transmembrane transporter activity | GO:0051119 sugar transmembrane transporter activity |	GO:0005887 integral to plasma membrane | GO:0016020 membrane |
orf19.4307	2.323	2.11181	1.46153	3.23149	1.47854	0.810223		Predicted ORF in Assemblies 19, 20 and 21	GO:0032511 late endosome to vacuole transport via multivesicular body sorting pathway | GO:0006623 protein targeting to vacuole |		GO:0005739 mitochondrion | GO:0005770 late endosome |
orf19.6073	4.77075	3.06985	2.46136	4.7122	1.4074	0.837741	HMX1	Heme oxygenase; acts in utilization of hemin iron; gene transcriptionally activated by heat, low iron, or hemin; negatively regulated by Efg1p; expression greater in low iron; upregulated by Rim101p at pH 8	GO:0006879 cellular iron ion homeostasis | GO:0042167 heme catabolic process |	GO:0004392 heme oxygenase (decyclizing) activity | GO:0020037 heme binding | GO:0004601 peroxidase activity |	GO:0016020 membrane | GO:0005783 endoplasmic reticulum | GO:0005886 plasma membrane |
orf19.4122	2.18702	2.32478	1.22222	1.82237	1.97507	1.041		Predicted ORF in Assemblies 19, 20 and 21	GO:0006635 fatty acid beta-oxidation |	GO:0016291 acyl-CoA thioesterase activity |	GO:0005739 mitochondrion | GO:0005777 peroxisome |
orf19.2829	2.15968	2.21837	1.31063	1.96956	1.50708	0.965829		Predicted ORF in Assemblies 19, 20 and 21	GO:0015031 protein transport |		GO:0005635 nuclear envelope | GO:0005783 endoplasmic reticulum |
orf19.5218	2.30351	2.57489	1.44304	2.22769	1.72656	1.12356		Predicted ORF from Assembly 19; merged with orf19.4122 in Assembly 20
orf19.4630	1.33978	2.80572	1.75331	5.87229	1.33458	0.723037	CPA1	Putative carbamoyl-phosphate synthase subunit; alkaline downregulated; transcription is upregulated in both intermediate and mature biofilms	GO:0006526 arginine biosynthetic process |	GO:0004088 carbamoyl-phosphate synthase (glutamine-hydrolyzing) activity |	GO:0005739 mitochondrion | GO:0005829 cytosol | GO:0005951 carbamoyl-phosphate synthase complex |
orf19.2092	1.60739	2.03239	1.42564	3.1369	1.34894	0.699716		Predicted ORF in Assemblies 19, 20 and 21; Gcn4p-regulated	GO:0019346 transsulfuration | GO:0009086 methionine biosynthetic process |	GO:0004121 cystathionine beta-lyase activity |
orf19.5561	1.58279	2.05226	1.34867	2.72264	1.33834	0.84215	RAV2	Protein similar to S. cerevisiae Rav2p, which is involved in acidification of the vacuole; transposon mutation affects filamentous growth	GO:0030447 filamentous growth | GO:0000747 conjugation with cellular fusion | GO:0007323 peptide pheromone maturation |
orf19.6947	1.78365	2.01165	1.46329	2.58953	2.03054	0.700795	GTT11	Predicted ORF in Assemblies 19, 20 and 21; induced by nitric oxide	GO:0006749 glutathione metabolic process |	GO:0004364 glutathione transferase activity |	GO:0005783 endoplasmic reticulum |
orf19.896	1.53949	2.01336	1.32294	2.26574	1.80149	0.725139	CHK1	Histidine kinase involved in a two-component signaling pathway that regulates cell wall biosynthesis; disruption impairs hyphal development and decreases virulence in mouse intravenous (but not rat vaginal) infection	GO:0000160 two-component signal transduction system (phosphorelay) | GO:0051042 negative regulation of calcium-independent cell-cell adhesion | GO:0009405 pathogenesis | GO:0044011 single-species biofilm formation on inanimate substrate | GO:0030448 hyphal growth | GO:0006468 protein amino acid phosphorylation | GO:0007234 osmosensory signaling pathway via two-component system | GO:0009272 fungal…	GO:0000155 two-component sensor activity | GO:0005034 osmosensor activity |	GO:0005737 cytoplasm | GO:0005886 plasma membrane |
orf19.3929	1.90782	2.1423	1.32115	4.32938	2.40451	0.758587		Predicted ORF in Assemblies 19, 20 and 21			GO:0005739 mitochondrion |
orf19.3861	2.27709	1.88895	1.48508	4.74081	2.39823	0.767337	SIS1	Predicted ORF in Assemblies 19, 20 and 21; macrophage/pseudohyphal-repressed; heavy metal (cadmium) stress-induced; heterozygous null mutant displays sensitivity to virgineone	GO:0006461 protein complex assembly | GO:0006413 translational initiation | GO:0006457 protein folding |		GO:0022627 cytosolic small ribosomal subunit |
orf19.2896	1.50999	2.07947	1.51592	1.67365	4.0786	1.70198	SOU1	Enzyme involved in utilization of L-sorbose; has sorbitol dehydrogenase, fructose reductase, and sorbose reductase activities; has NAD-binding site motif; transcriptional regulation affected by chromosome 5 copy number	GO:0042850 L-sorbose catabolic process | GO:0009062 fatty acid catabolic process |	GO:0008670 2,4-dienoyl-CoA reductase (NADPH) activity | GO:0032115 sorbose reductase activity | GO:0050085 mannitol 2-dehydrogenase (NADP+) activity |	GO:0005782 peroxisomal matrix |
orf19.2233	1.57831	2.38357	1.28573	1.73944	2.57215	1.27841	PRE2	Protein described as beta-5 subunit of proteasome; macrophage-induced protein	GO:0006511 ubiquitin-dependent protein catabolic process |	GO:0004175 endopeptidase activity |	GO:0019774 proteasome core complex, beta-subunit complex |
orf19.4527	0.916058	3.0201	2.63753	3.29711	2.35664	1.65484	HGT1	High-affinity glucose transporter, member of major facilitator superfamily; transcription induced by progesterone and by drugs including chloramphenicol and benomyl; likely essential for growth, based on an insertional mutagenesis strategy	GO:0015758 glucose transport | GO:0042493 response to drug | GO:0008643 carbohydrate transport |	GO:0005355 glucose transmembrane transporter activity | GO:0051119 sugar transmembrane transporter activity |	GO:0016021 integral to membrane | GO:0005887 integral to plasma membrane | GO:0016020 membrane | GO:0005886 plasma membrane |
orf19.822	0.673411	1.61216	5.66389	7.43216	5.81265	1.30085		Protein detected in some, not all, biofilm extracts; fluconazole-downregulated; greater mRNA abundance observed in cyr1 or ras1 homozygous null mutant than in wild type; protein detected by mass spec in stationary phase cultures			GO:0009986 cell surface |
orf19.1014	0.968442	2.17438	1.46882	2.39844	1.4228	0.734292		Predicted ORF from Assembly 19; removed from Assembly 20
orf19.4026	1.09318	2.04601	2.29735	1.40035	1.27976	2.86845	HIS1	ATP phosphoribosyl transferase; enzyme of histidine biosynthesis; fungal-specific (no human, murine homolog); upregulated in biofilm; acid upregulated/alkaline downregulated by Rim101p; regulated by Gcn2p, Gcn4p; strain CA9 is a his1 mutant	GO:0000105 histidine biosynthetic process |	GO:0003879 ATP phosphoribosyltransferase activity |	GO:0005623 cell |
orf19.4342	1.24503	4.31116	6.21408	1.62309	2.14145	10.4403	SUT1	Predicted ORF in Assemblies 19, 20 and 21	GO:0015918 sterol transport | GO:0006357 regulation of transcription from RNA polymerase II promoter |	GO:0003700 transcription factor activity | GO:0003704 specific RNA polymerase II transcription factor activity |	GO:0005634 nucleus |
orf19.3637	1.43057	2.08038	1.95988	1.10312	1.36031	2.15227		Predicted ORF in Assemblies 19, 20 and 21
orf19.3675	1.63147	3.04347	3.48588	1.12621	1.85305	3.04058	GAL7	Predicted ORF in Assemblies 19, 20 and 21; macrophage/pseudohyphal-repressed	GO:0033499 galactose catabolic process via UDP-galactose |	GO:0017103 UTP | GO:0008108 UDP-glucose |	GO:0005737 cytoplasm |
orf19.2658	1.27772	1.35417	2.33617	0.931273	1.45573	2.46554		Predicted ORF from Assembly 19; merged with orf19.1352 in Assembly 20
orf19.4591	1.23421	1.39423	2.36353	0.780753	1.69584	3.4238	CAT2	Major carnitine acetyl transferase localized in peroxisomes and mitochondria; involved in intracellular acetyl-CoA transport; transcriptionally induced in macrophage; farnesol-upregulated in biofilm; Hog1p-downregulated	GO:0006084 acetyl-CoA metabolic process | GO:0006520 cellular amino acid metabolic process | GO:0009405 pathogenesis | GO:0042710 biofilm formation | GO:0006635 fatty acid beta-oxidation | GO:0045333 cellular respiration | GO:0009437 carnitine metabolic process |	GO:0004092 carnitine O-acetyltransferase activity |	GO:0005777 peroxisome | GO:0005739 mitochondrion | GO:0005782 peroxisomal matrix |
orf19.3669	1.16711	1.89852	2.44643	0.915967	2.16163	3.4266	SHA3	Protein similar to S. cerevisiae Sha3p, which is a serine/threonine kinase involved in glucose transport; transposon mutation affects filamentous growth; fluconazole-induced; ketoconazole-repressed; induced in response to alpha pheromone	GO:0030447 filamentous growth | GO:0006468 protein amino acid phosphorylation | GO:0015758 glucose transport | GO:0045944 positive regulation of transcription from RNA polymerase II promoter | GO:0009749 response to glucose stimulus |	GO:0004674 protein serine/threonine kinase activity |	GO:0005634 nucleus | GO:0005737 cytoplasm |
orf19.7514	1.09524	6.52201	13.0499	0.619824	0.859218	3.74673	PCK1	Phosphoenolpyruvate carboxykinase; role in gluconeogenesis; regulated by hyphal switch, carbon source; repressed on glucose; induced by fluconazole, phagocytosis, H2O2; predicted ATP-dependent, dimeric; predicted PKC phosphorylation sites	GO:0006094 gluconeogenesis |	GO:0004612 phosphoenolpyruvate carboxykinase (ATP) activity |	GO:0005829 cytosol |
orf19.3672	0.659799	2.44652	5.60226	0.505509	1.25312	4.04012	GAL10	UDP-glucose 4-epimerase, required for galactose utilization; mutant shows cell wall defects and increased filamentation; fluconazole-induced; protein detected by mass spec in stationary phase cultures	GO:0030447 filamentous growth | GO:0006979 response to oxidative stress | GO:0009272 fungal-type cell wall biogenesis | GO:0001403 invasive growth in response to glucose limitation | GO:0019388 galactose catabolic process | GO:0033499 galactose catabolic process via UDP-galactose |	GO:0003978 UDP-glucose 4-epimerase activity | GO:0004034 aldose 1-epimerase activity |	GO:0005737 cytoplasm | GO:0005625 soluble fraction |
orf19.3419	0.75339	3.45587	7.38959	0.632147	1.31691	3.65549	MAE1	Malic enzyme, mitochondrial; transcription regulated by Mig1p and Tup1p; shows colony morphology-related gene regulation by Ssn6p	GO:0006520 cellular amino acid metabolic process | GO:0006090 pyruvate metabolic process |	GO:0004470 malic enzyme activity | GO:0016619 malate dehydrogenase (oxaloacetate-decarboxylating) activity |	GO:0005739 mitochondrion |
orf19.3540	1.58839	1.51689	1.61508	0.601699	2.12708	2.23057	MAK5	Predicted ORF in Assemblies 19, 20 and 21; oxidative stress-repressed via Cap1p; decreased expression in response to prostaglandins	GO:0000027 ribosomal large subunit assembly | GO:0006364 rRNA processing |	GO:0004004 ATP-dependent RNA helicase activity |	GO:0005730 nucleolus |
orf19.2250	2.50162	1.97927	1.8742	0.445326	2.02288	2.64146	SPE3	Predicted ORF in Assemblies 19, 20 and 21	GO:0008295 spermidine biosynthetic process | GO:0015940 pantothenate biosynthetic process |	GO:0004766 spermidine synthase activity |	GO:0005634 nucleus | GO:0005737 cytoplasm |
orf19.4401	2.0573	1.62785	1.43553	0.993965	1.38009	2.51034	YVH1	Putative dual specificity phosphatase (phosphoserine/threonine and phosphotyrosine phosphatase); similar to S. cerevisiae Yvh1p; required for wild-type growth rate and for wild-type virulence in mouse model of systemic infection	GO:0040010 positive regulation of growth rate | GO:0030448 hyphal growth | GO:0009405 pathogenesis | GO:0007126 meiosis | GO:0030437 ascospore formation | GO:0005977 glycogen metabolic process |	GO:0008138 protein tyrosine/serine/threonine phosphatase activity | GO:0004725 protein tyrosine phosphatase activity |	GO:0005737 cytoplasm |
orf19.7424	2.48271	1.8957	1.66813	0.78432	1.80958	2.83128	NSA2	Predicted ORF in Assemblies 19, 20 and 21; decreased expression in response to prostaglandins	GO:0000466 maturation of 5.8S rRNA from tricistronic rRNA transcript (SSU-rRNA, 5.8S rRNA, LSU-rRNA) | GO:0042273 ribosomal large subunit biogenesis | GO:0000463 maturation of LSU-rRNA from tricistronic rRNA transcript (SSU-rRNA, 5.8S rRNA, LSU-rRNA) |		GO:0030687 preribosome, large subunit precursor | GO:0005634 nucleus |
orf19.962	2.29068	1.94022	1.512	0.882556	1.94853	2.62749		Predicted ORF in Assemblies 19, 20 and 21
orf19.2504	2.16463	1.9443	1.48635	0.628821	1.5728	2.63911	BMS1	Predicted ORF in Assemblies 19, 20 and 21; mutation confers resistance to 5-fluorocytosine (5-FC); flucytosine induced; decreased expression in response to prostaglandins	GO:0042493 response to drug | GO:0042255 ribosome assembly | GO:0006364 rRNA processing |	GO:0005525 GTP binding | GO:0034511 U3 snoRNA binding | GO:0003924 GTPase activity |	GO:0005739 mitochondrion | GO:0030686 90S preribosome | GO:0005730 nucleolus |
orf19.2859	2.362	1.85136	1.41368	0.630036	1.78277	2.81856	SRP40	Predicted ORF in Assemblies 19, 20 and 21; macrophage/pseudohyphal-induced	GO:0006913 nucleocytoplasmic transport | GO:0006461 protein complex assembly |		GO:0005730 nucleolus |
orf19.5850	2.27476	1.54844	1.32103	0.595538	1.71496	3.21525	NOC2	Protein similar to S. cerevisiae Noc2p; transposon mutation affects filamentous growth; mutation confers hypersensitivity to 5-fluorouracil (5-FU), tubercidin (7-deazaadenosine); downregulated during core stress response	GO:0030447 filamentous growth | GO:0042493 response to drug |		GO:0005730 nucleolus | GO:0005739 mitochondrion | GO:0030691 Noc2p-Noc3p complex | GO:0030690 Noc1p-Noc2p complex |
orf19.7011	2.26912	1.77316	1.55719	0.741488	1.56118	3.45077		Predicted ORF in Assemblies 19, 20 and 21	GO:0030490 maturation of SSU-rRNA |		GO:0005840 ribosome | GO:0005634 nucleus | GO:0030686 90S preribosome |
orf19.5959	2.06487	1.82124	1.37487	0.671753	2.90949	3.04025	NOP14	Predicted ORF in Assemblies 19, 20 and 21; mutation confers resistance to 5-fluorocytosine (5-FC), 5-fluorouracil (5-FU), and tubercidin (7-deazaadenosine); heterozygous null mutant exhibits resistance to parnafungin	GO:0042493 response to drug | GO:0042274 ribosomal small subunit biogenesis | GO:0000480 endonucleolytic cleavage in 5'-ETS of tricistronic rRNA transcript (SSU-rRNA, 5.8S rRNA, LSU-rRNA) | GO:0000472 endonucleolytic cleavage to generate mature 5'-end of SSU-rRNA from (SSU-rRNA, 5.8S rRNA, LSU-rRNA) | GO:0000447 endonucleolytic cleavage in ITS1 to separate SSU-rRNA from 5.8S rRNA and LSU-rRNA fro…	GO:0030515 snoRNA binding |	GO:0005732 small nucleolar ribonucleoprotein complex | GO:0005739 mitochondrion | GO:0032040 small-subunit processome | GO:0030692 Noc4p-Nop14p complex |
orf19.7398	2.05004	1.8448	1.34251	0.792003	2.60258	2.67737		Predicted ORF in Assemblies 19, 20 and 21; decreased expression in response to prostaglandins	GO:0042273 ribosomal large subunit biogenesis |		GO:0005634 nucleus |
orf19.6297	1.80326	1.57366	1.3292	0.790012	2.00629	2.5084		Predicted ORF in Assemblies 19, 20 and 21	GO:0031119 tRNA pseudouridine synthesis |	GO:0004730 pseudouridylate synthase activity | GO:0009982 pseudouridine synthase activity |	GO:0005634 nucleus | GO:0005737 cytoplasm |
orf19.7422	2.14678	1.6432	1.42048	0.909354	2.42707	3.53254		Predicted ORF in Assemblies 19, 20 and 21	GO:0000154 rRNA modification |	GO:0003723 RNA binding |	GO:0005732 small nucleolar ribonucleoprotein complex | GO:0030532 small nuclear ribonucleoprotein complex |
orf19.665	1.68	1.42974	1.26555	1.01087	2.09993	2.91374	NEP1	Protein of unknown function; ortholog of S. cerevisiae Emg1p, which is involved in ribosome biogenesis	GO:0042254 ribosome biogenesis | GO:0042274 ribosomal small subunit biogenesis | GO:0000480 endonucleolytic cleavage in 5'-ETS of tricistronic rRNA transcript (SSU-rRNA, 5.8S rRNA, LSU-rRNA) | GO:0000472 endonucleolytic cleavage to generate mature 5'-end of SSU-rRNA from (SSU-rRNA, 5.8S rRNA, LSU-rRNA) | GO:0000447 endonucleolytic cleavage in ITS1 to separate SSU-rRNA from 5.8S rRNA and LSU-rRNA …	GO:0003723 RNA binding | GO:0042803 protein homodimerization activity |	GO:0005730 nucleolus | GO:0032040 small-subunit processome | GO:0030686 90S preribosome | GO:0005737 cytoplasm | GO:0005880 nuclear microtubule |
orf19.1923	1.48295	1.36445	1.03781	0.90627	2.20581	2.61549	RRN3	Predicted ORF in Assemblies 19, 20 and 21; caspofungin induced, flucytosine repressed; downregulated in core stress response; decreased expression in response to prostaglandins	GO:0006360 transcription from RNA polymerase I promoter |	GO:0003701 RNA polymerase I transcription factor activity |	GO:0000120 RNA polymerase I transcription factor complex | GO:0005730 nucleolus |
orf19.1687	1.82157	1.65764	1.18676	0.947784	2.73673	3.27387		Predicted ORF in Assemblies 19, 20 and 21	GO:0000466 maturation of 5.8S rRNA from tricistronic rRNA transcript (SSU-rRNA, 5.8S rRNA, LSU-rRNA) | GO:0042273 ribosomal large subunit biogenesis | GO:0000463 maturation of LSU-rRNA from tricistronic rRNA transcript (SSU-rRNA, 5.8S rRNA, LSU-rRNA) | GO:0000390 spliceosome disassembly | GO:0000462 maturation of SSU-rRNA from tricistronic rRNA transcript (SSU-rRNA, 5.8S rRNA, LSU-rRNA) |	GO:0031202 RNA splicing factor activity, transesterification mechanism | GO:0004004 ATP-dependent RNA helicase activity |	GO:0005681 spliceosomal complex | GO:0005739 mitochondrion | GO:0030686 90S preribosome |
orf19.6175	1.42891	1.16516	0.94641	0.789032	2.29604	2.11137		Predicted ORF in Assemblies 19, 20 and 21; decreased expression in response to prostaglandins	GO:0000480 endonucleolytic cleavage in 5'-ETS of tricistronic rRNA transcript (SSU-rRNA, 5.8S rRNA, LSU-rRNA) | GO:0000472 endonucleolytic cleavage to generate mature 5'-end of SSU-rRNA from (SSU-rRNA, 5.8S rRNA, LSU-rRNA) | GO:0000447 endonucleolytic cleavage in ITS1 to separate SSU-rRNA from 5.8S rRNA and LSU-rRNA from tricistronic rRNA transcript (SSU-rRNA, 5.8S rRNA, LSU-rRNA) |		GO:0005730 nucleolus |
orf19.5020	1.67979	1.12359	0.898366	0.817469	2.3478	2.95813		Predicted ORF in Assemblies 19, 20 and 21
orf19.661	1.65714	1.19667	1.06851	0.901359	2.00257	2.521	KRR1	Decreased transcription is observed upon benomyl treatment or in an azole-resistant strain that overexpresses MDR1; induced upon biofilm formation	GO:0042274 ribosomal small subunit biogenesis | GO:0000447 endonucleolytic cleavage in ITS1 to separate SSU-rRNA from 5.8S rRNA and LSU-rRNA from tricistronic rRNA transcript (SSU-rRNA, 5.8S rRNA, LSU-rRNA) |		GO:0032040 small-subunit processome | GO:0030686 90S preribosome | GO:0005730 nucleolus |
orf19.4870	1.89579	1.52728	1.1805	0.368812	2.38452	3.67923	DBP3	Predicted ORF in Assemblies 19, 20 and 21; decreased expression in response to prostaglandins	GO:0006364 rRNA processing | GO:0000027 ribosomal large subunit assembly |	GO:0004004 ATP-dependent RNA helicase activity | GO:0008186 RNA-dependent ATPase activity |	GO:0005730 nucleolus |
orf19.7384	2.39448	1.79562	1.41956	0.276131	2.39311	4.6519	NOG1	Predicted ORF in Assemblies 19, 20 and 21; mutation confers hypersensitivity to 5-fluorocytosine (5-FC), 5-fluorouracil (5-FU), and tubercidin (7-deazaadenosine); decreased expression in response to prostaglandins	GO:0042493 response to drug | GO:0006364 rRNA processing | GO:0000054 ribosome export from nucleus | GO:0042273 ribosomal large subunit biogenesis |	GO:0003924 GTPase activity |	GO:0030687 preribosome, large subunit precursor | GO:0005730 nucleolus |
orf19.1566	2.03347	1.43934	1.00279	0.541048	2.75235	4.23304	UTP21	Predicted ORF in Assemblies 19, 20 and 21; physically interacts with TAP-tagged Nop1p	GO:0006364 rRNA processing |		GO:0034388 Pwp2p-containing subcomplex of 90S preribosome | GO:0032040 small-subunit processome |
orf19.5038	1.66272	1.26837	1.11152	0.567424	2.48919	2.75284		Predicted ORF in Assemblies 19, 20 and 21	GO:0030488 tRNA methylation |	GO:0016423 tRNA (guanine) methyltransferase activity |	GO:0005737 cytoplasm |
orf19.3034	1.887	1.45025	0.959169	0.540004	2.30337	2.67779	RLI1	Member of RNase L inhibitor (RLI) subfamily of ABC family; predicted not to be a transporter	GO:0006413 translational initiation | GO:0000054 ribosome export from nucleus | GO:0042273 ribosomal large subunit biogenesis |	GO:0005524 ATP binding | GO:0005506 iron ion binding |	GO:0005634 nucleus | GO:0022626 cytosolic ribosome |
orf19.4093	2.42073	2.18805	1.61861	0.196285	1.52365	3.45868	NOP7	Pescadillo homolog required for filament-to-yeast switching; mutation confers hypersensitivity to 5-fluorocytosine (5-FC), 5-fluorouracil (5-FU), and tubercidin (7-deazaadenosine)	GO:0042493 response to drug | GO:0008283 cell proliferation | GO:0007049 cell cycle | GO:0042273 ribosomal large subunit biogenesis | GO:0000462 maturation of SSU-rRNA from tricistronic rRNA transcript (SSU-rRNA, 5.8S rRNA, LSU-rRNA) | GO:0009405 pathogenesis | GO:0030447 filamentous growth |		GO:0030687 preribosome, large subunit precursor | GO:0005730 nucleolus |
orf19.7062	2.55775	2.20344	1.66616	0.254443	1.45353	3.22874	RPA135	Predicted ORF in Assemblies 19, 20 and 21; decreased expression in response to prostaglandins	GO:0006360 transcription from RNA polymerase I promoter |	GO:0003899 DNA-directed RNA polymerase activity |	GO:0005736 DNA-directed RNA polymerase I complex |
orf19.1030	2.83298	2.06882	1.56053	0.420356	1.39246	2.76014		Predicted ORF in Assemblies 19, 20 and 21	GO:0051598 meiotic recombination checkpoint |	GO:0003755 peptidyl-prolyl cis-trans isomerase activity | GO:0005527 macrolide binding |	GO:0005730 nucleolus |
orf19.1839	2.18416	2.03071	1.39186	0.399778	1.48653	2.65434	RPA190	Predicted ORF in Assemblies 19, 20 and 21;flucytosine induced	GO:0006360 transcription from RNA polymerase I promoter |	GO:0003899 DNA-directed RNA polymerase activity |	GO:0005736 DNA-directed RNA polymerase I complex | GO:0005730 nucleolus |
orf19.637	1.71282	2.41403	2.23064	0.443183	1.53341	1.72473	SDH2	Succinate dehydrogenase, Fe-S subunit; localizes to surface of yeast-form cells, but not hyphae; transcriptionally regulated by iron; expression greater in high iron; repressed by nitric oxide; induced during log phase (aerobic growth)	GO:0006099 tricarboxylic acid cycle | GO:0006105 succinate metabolic process | GO:0006121 mitochondrial electron transport, succinate to ubiquinone |	GO:0000104 succinate dehydrogenase activity | GO:0008177 succinate dehydrogenase (ubiquinone) activity |	GO:0030445 yeast-form cell wall | GO:0009986 cell surface | GO:0005759 mitochondrial matrix | GO:0005749 mitochondrial respiratory chain complex II |
orf19.1770	1.28889	2.08267	2.02204	0.451183	1.61082	2.15577	CYC1	Cytochrome c; complements defects of an S. cerevisiae cyc1 cyc7 double mutant; transcriptionally regulated by iron; expression greater in high iron; alkaline downregulated; repressed by nitric oxide	GO:0006122 mitochondrial electron transport, ubiquinol to cytochrome c | GO:0006123 mitochondrial electron transport, cytochrome c to oxygen |	GO:0009055 electron carrier activity |	GO:0005739 mitochondrion | GO:0005758 mitochondrial intermembrane space |
orf19.3121	3.23693	5.77524	2.29234	8.07393	0.82308	0.169448	GST1	Predicted ORF in Assemblies 19, 20 and 21; upregulated in the presence of human neutrophils; expression is regulated upon white-opaque switching; increased transcription is observed upon benomyl treatment	GO:0006808 regulation of nitrogen utilization |	GO:0003714 transcription corepressor activity |	GO:0005625 soluble fraction |
orf19.1958	2.08178	1.94822	1.45226	2.0302	0.867056	0.709489		Predicted ORF in Assemblies 19, 20 and 21; possibly spurious ORF (Annotation Working Group prediction)
orf19.541	3.44569	4.1786	2.48009	6.08914	0.81219	0.585087		Predicted ORF in Assemblies 19, 20 and 21
orf19.6408	3.05345	1.89505	1.06808	2.57456	1.1695	0.416245		Predicted ORF in Assemblies 19, 20 and 21; induced during planktonic growth	GO:0006626 protein targeting to mitochondrion |	GO:0001671 ATPase activator activity |	GO:0005829 cytosol |
orf19.4133	2.08898	2.0269	1.63704	1.48794	1.01685	0.931707		Predicted ORF in Assemblies 19, 20 and 21	GO:0006366 transcription from RNA polymerase II promoter |		GO:0005737 cytoplasm |
orf19.459	2.0684	2.19061	1.65716	1.93271	1.07235	0.860851	ADP1	Putative PDR-subfamily ABC transporter; similar to WHITE subfamily proteins; gene used for strain identification by multilocus sequence typing	GO:0006810 transport |	GO:0042626 ATPase activity, coupled to transmembrane movement of substances | GO:0005524 ATP binding |	GO:0016021 integral to membrane | GO:0005783 endoplasmic reticulum |
orf19.3516	2.42284	3.27284	2.19151	1.95515	1.29755	0.987359		Predicted ORF in Assemblies 19, 20 and 21
orf19.2244	3.48574	8.39199	3.43602	2.56914	1.35206	0.327408		Similar to oxidoreductases and to S. cerevisiae Yjr096wp; transcription is negatively regulated by Sfu1p; increased transcription is observed upon benomyl treatment; decreased expression observed in an ssr1 homozygous null mutant
orf19.6059	2.36335	2.66824	2.05722	1.75602	1.51904	0.634302	TTR1	Putative glutaredoxin; described as a glutathione reductase; upregulated in the presence of human neutrophils, and upon benomyl treatment; alkaline downregulated; regulated by Gcn2p and Gcn4p; required for virulence in mouse model	GO:0009405 pathogenesis | GO:0006979 response to oxidative stress | GO:0045454 cell redox homeostasis |	GO:0004364 glutathione transferase activity | GO:0015036 disulfide oxidoreductase activity | GO:0004602 glutathione peroxidase activity |	GO:0005829 cytosol | GO:0005739 mitochondrion |
orf19.717	1.70725	2.0332	2.01552	1.87545	1.6704	0.790898	HSP60	Protein described as mitochondrial heat shock protein; soluble protein in hyphae; transcription is regulated by Nrg1p; transcriptionally regulated by iron; expression greater in high iron; heavy metal (cadmium) stress-induced	GO:0045041 protein import into mitochondrial intermembrane space | GO:0051131 chaperone-mediated protein complex assembly | GO:0050821 protein stabilization | GO:0042026 protein refolding | GO:0006458 'de novo' protein folding | GO:0051604 protein maturation |	GO:0042623 ATPase activity, coupled | GO:0051082 unfolded protein binding | GO:0003697 single-stranded DNA binding | GO:0003688 DNA replication origin binding | GO:0051087 chaperone binding | GO:0016887 ATPase activity |	GO:0005625 soluble fraction | GO:0042645 mitochondrial nucleoid |
orf19.2284	2.72092	3.49411	2.29262	1.25417	1.02081	0.837065		Predicted ORF in Assemblies 19, 20 and 21
orf19.5720	4.10403	5.32973	2.33379	1.20749	1.00746	0.668511		Predicted membrane transporter, member of the monocarboxylate porter (MCP) family, major facilitator superfamily (MFS); ketoconazole or caspofungin repressed	GO:0015718 monocarboxylic acid transport |	GO:0008028 monocarboxylic acid transmembrane transporter activity |	GO:0000329 fungal-type vacuole membrane | GO:0016020 membrane |
orf19.238	2.20766	2.91233	1.59647	1.16249	1.18585	0.722715	CCP1	Similar to cytochrome-c peroxidase N terminus; transcription is negatively regulated by Rim101p or alkaline pH; transcription induced by interaction with macrophage or low iron; oxygen-induced activity	GO:0006979 response to oxidative stress |	GO:0004130 cytochrome-c peroxidase activity |	GO:0005758 mitochondrial intermembrane space |
orf19.23	3.72278	3.5657	2.37386	0.989157	1.07941	0.630755	RTA3	Similar to S. cerevisiae Rta1p (role in 7-aminocholesterol resistance) and Rsb1p (flippase); putative membrane protein; putative drug-responsive regulatory site; induced by fluphenazine, estradiol, ketoconazole, caspofungin	GO:0015908 fatty acid transport |	GO:0004012 phospholipid-translocating ATPase activity |	GO:0016020 membrane | GO:0005886 plasma membrane | GO:0016021 integral to membrane | GO:0005783 endoplasmic reticulum |
orf19.6229	10.3413	6.51507	4.36064	1.314	1.17263	0.364876	CAT1	Catalase; role in resistance to oxidative stress, neutrophils, peroxide; role in murine systemic virulence; regulated by iron, ciclopirox olamine, fluconazole, growth, carbon source, pH, Rim101p, Ssn6p, Hog1p, farnesol, core stress response	GO:0009405 pathogenesis | GO:0006800 oxygen and reactive oxygen species metabolic process | GO:0042744 hydrogen peroxide catabolic process | GO:0051701 interaction with host | GO:0030448 hyphal growth | GO:0042542 response to hydrogen peroxide | GO:0001315 age-dependent response to reactive oxygen species |	GO:0004096 catalase activity | GO:0005515 protein binding |	GO:0009277 fungal-type cell wall | GO:0005759 mitochondrial matrix | GO:0005782 peroxisomal matrix |
orf19.3131	9.8655	12.3451	9.82845	1.78945	0.98751	0.331877	OYE32	Protein of NAD(P)H oxidoreductase family; induced by nitric oxide, amphotericin B, oxidative stress (via Cap1p); increased transcription associated with MDR1 overexpression or benomyl treatment; macrophage-downregulated protein abundance	GO:0045454 cell redox homeostasis |	GO:0003959 NADPH dehydrogenase activity |
orf19.251	6.07833	6.65029	4.12872	1.94642	0.984488	0.449567		ThiJ/PfpI protein family; antigenic (Cand a 3 allergen); binds human immunoglobulin E; 2 N-glycosylation motifs; alkaline, fluconazole, Hog1p-downregulated; induced in core stress response or by oxidative stress (via Cap1p)			GO:0030446 hyphal cell wall | GO:0005625 soluble fraction |
orf19.7601	2.54848	2.48789	1.42417	1.28898	0.889962	0.829636		Predicted ORF in Assemblies 19, 20 and 21	GO:0031167 rRNA methylation |	GO:0008650 rRNA (uridine-2'-O-)-methyltransferase activity |	GO:0005739 mitochondrion |
orf19.5356	2.59998	2.35538	1.33548	0.936421	0.788432	0.746892		Predicted ORF in Assemblies 19, 20 and 21; downregulated during core stress response			GO:0005634 nucleus | GO:0005737 cytoplasm |
orf19.5604	11.317	17.0041	4.46406	0.743113	0.63313	0.22152	MDR1	Multidrug efflux pump of plasma membrane; member of the MDR family of major facilitator transporter superfamily; methotrexate is preferred substrate; overexpression in drug-resistant clinical isolates confers fluconazole resistance	GO:0006855 multidrug transport | GO:0046618 drug export | GO:0042493 response to drug | GO:0015903 fluconazole transport | GO:0042710 biofilm formation | GO:0006979 response to oxidative stress | GO:0009405 pathogenesis | GO:0009636 response to toxin | GO:0015893 drug transport |	GO:0015559 multidrug efflux pump activity | GO:0015244 fluconazole transporter activity | GO:0015238 drug transporter activity |	GO:0005886 plasma membrane | GO:0016021 integral to membrane | GO:0005887 integral to plasma membrane | GO:0016020 membrane |
orf19.6000	4.37163	3.75522	2.57941	1.12619	0.532982	0.53614	CDR1	Multidrug transporter of ATP-binding cassette (ABC) superfamily; transports phospholipids in an in-to-out direction; transcription induced by beta-estradiol, progesterone, corticosteroid, or cholesterol	GO:0042493 response to drug | GO:0006855 multidrug transport | GO:0046618 drug export | GO:0015903 fluconazole transport | GO:0045332 phospholipid translocation | GO:0045117 azole transport | GO:0042710 biofilm formation | GO:0006979 response to oxidative stress | GO:0006810 transport | GO:0048545 response to steroid hormone stimulus |	GO:0005215 transporter activity | GO:0042626 ATPase activity, coupled to transmembrane movement of substances | GO:0015239 multidrug transporter activity | GO:0015238 drug transporter activity | GO:0015244 fluconazole transporter activity | GO:0005548 phospholipid transporter activity | GO:0045118 azole transporter activity | GO:0017111 nucleoside-triphosphatase activity | GO:0008144 drug binding…	GO:0005887 integral to plasma membrane | GO:0005886 plasma membrane | GO:0016020 membrane | GO:0009986 cell surface | GO:0045121 membrane raft | GO:0016021 integral to membrane | GO:0005739 mitochondrion |
orf19.5094	2.92737	4.78059	1.92907	1.26812	1.06913	0.35352	BUL1	Protein not essential for viability; macrophage/pseudohyphal-induced; similar to S. cerevisiae Bul1p, which may be involved in selection of substrates for ubiquitination	GO:0000209 protein polyubiquitination | GO:0006513 protein monoubiquitination | GO:0000001 mitochondrion inheritance |		GO:0005886 plasma membrane |
orf19.432	3.35684	3.73902	1.72995	1.34587	0.806719	0.424463		Predicted ORF in Assemblies 19, 20 and 21
orf19.1797	2.86089	2.87738	1.26631	1.43205	0.833432	0.39914		Predicted ORF in Assemblies 19, 20 and 21; induced upon biofilm formation; has GutQ domain, which is associated with phosphosugar binding
orf19.2977	2.08099	2.34951	1.96446	1.37332	0.865258	0.529401		Predicted ORF in Assemblies 19, 20 and 21
orf19.6491	6.93666	3.99687	2.93647	2.0168	1.03345	0.39023		Predicted ORF in Assemblies 19, 20 and 21
orf19.7085	8.07971	4.69282	3.122	2.69077	1.10232	0.237196		Predicted ORF in Assemblies 19, 20 and 21; induced in core stress response; induced by heavy metal (cadmium) stress via Hog1p; oxidative stress-induced via Cap1p; induced by Mnl1p under weak acid stress; macrophage-downregulated
orf19.847	5.27575	5.08472	3.17869	1.99506	1.29276	0.366761	YIM1	Protein similar to protease of mitochondrial inner membrane; increased transcription is observed upon benomyl treatment; macrophage-downregulated gene	GO:0006627 mitochondrial protein processing during import | GO:0006974 response to DNA damage stimulus |	GO:0004175 endopeptidase activity |	GO:0005743 mitochondrial inner membrane | GO:0005811 lipid particle |
orf19.6070	4.24414	2.09755	1.38996	1.14781	0.782556	0.9397	ENA2	Protein described as sodium transporter; transcription is upregulated in response to ciclopirox olamine; alkaline upregulated by Rim101p; repressed upon high-level peroxide stress; upregulated in oral candidiasis clinical isolates	GO:0006814 sodium ion transport | GO:0006813 potassium ion transport | GO:0055085 transmembrane transport |	GO:0008556 potassium-transporting ATPase activity | GO:0008554 sodium-exporting ATPase activity, phosphorylative mechanism |	GO:0005739 mitochondrion | GO:0005624 membrane fraction | GO:0005886 plasma membrane |
orf19.5908	2.42544	2.46992	1.17863	1.09095	0.608645	0.942634	TEC1	TEA/ATTS transcription factor involved in regulation of hypha-specific genes; required for wild-type biofilm formation; regulates BCR1; directly transcriptionally regulated by Cph2p under some growth conditions; alkaline upregulated	GO:0030448 hyphal growth | GO:0009405 pathogenesis | GO:0007124 pseudohyphal growth | GO:0006355 regulation of transcription, DNA-dependent | GO:0045944 positive regulation of transcription from RNA polymerase II promoter | GO:0044011 single-species biofilm formation on inanimate substrate | GO:0007155 cell adhesion | GO:0044406 adhesion to host |	GO:0003704 specific RNA polymerase II transcription factor activity | GO:0003700 transcription factor activity |	GO:0005634 nucleus |
orf19.2480.1	1.44303	1.8707	1.50785	2.32399	0.424129	0.337629	AUT7	ORF Predicted by Annotation Working Group; macrophage/pseudohyphal-repressed; intron in 5'-UTR	GO:0006888 ER to Golgi vesicle-mediated transport | GO:0034727 piecemeal microautophagy of nucleus | GO:0032258 CVT pathway | GO:0006944 membrane fusion | GO:0000045 autophagic vacuole formation |		GO:0005875 microtubule associated complex | GO:0005829 cytosol | GO:0005776 autophagic vacuole | GO:0019898 extrinsic to membrane | GO:0005774 vacuolar membrane | GO:0000407 pre-autophagosomal structure |
orf19.4477	1.65956	2.57912	2.49966	2.04822	0.634418	0.542095	CSH1	Member of aldo-keto reductase family, similar to aryl alcohol dehydrogenases; role in adhesion to fibronectin, cell surface hydrophobicity; regulated by temperature, growth phase, benomyl, macrophage interaction; azole resistance associated	GO:0007160 cell-matrix adhesion | GO:0009405 pathogenesis | GO:0006081 cellular aldehyde metabolic process | GO:0042710 biofilm formation |	GO:0016491 oxidoreductase activity | GO:0018456 aryl-alcohol dehydrogenase activity |	GO:0005829 cytosol | GO:0009986 cell surface | GO:0030446 hyphal cell wall |
orf19.125	2.15806	2.44324	1.87378	1.6771	0.362267	0.565836	EBP1	NADPH oxidoreductase; interacts with phenolic substrates, such as 17beta-estradiol; possible role in response to estrogen; induced by oxidative and weak acid stress, nitric oxide, benomyl; activated by Cap1p, Mnl1p; no mammalian homolog	GO:0008202 steroid metabolic process |	GO:0005496 steroid binding | GO:0003959 NADPH dehydrogenase activity | GO:0008144 drug binding | GO:0042562 hormone binding |	GO:0000324 fungal-type vacuole | GO:0030446 hyphal cell wall | GO:0009986 cell surface | GO:0005625 soluble fraction |
orf19.3309	1.20619	2.1947	1.55831	2.50441	0.66146	0.965489		Predicted ORF in Assemblies 19, 20 and 21
orf19.4095	2.43407	2.17508	1.70511	0.859206	1.2671	0.812519		Predicted ORF in Assemblies 19, 20 and 21
orf19.4028	2.17928	2.15072	1.64724	0.742595	1.07677	0.892874		Predicted ORF in Assemblies 19, 20 and 21	GO:0006888 ER to Golgi vesicle-mediated transport | GO:0019408 dolichol biosynthetic process | GO:0006486 protein amino acid glycosylation |	GO:0045547 dehydrodolichyl diphosphate synthase activity |	GO:0005783 endoplasmic reticulum |
orf19.3448	3.45162	3.43869	2.22018	0.734681	1.07589	1.14918		Predicted ORF in Assemblies 19, 20 and 21; ketoconazole-repressed; possibly spurious ORF (Annotation Working Group prediction)
orf19.6948	2.41136	2.68577	1.53509	0.607298	1.3507	0.764173	CCC1	Protein described as predicted manganese transporter; alkaline downregulated; shows colony morphology-related gene regulation by Ssn6p; repressed by nitric oxide	GO:0030026 cellular manganese ion homeostasis | GO:0015684 ferrous iron transport | GO:0006879 cellular iron ion homeostasis | GO:0006828 manganese ion transport | GO:0006874 cellular calcium ion homeostasis | GO:0030447 filamentous growth |	GO:0005384 manganese ion transmembrane transporter activity | GO:0015093 ferrous iron transmembrane transporter activity |	GO:0005624 membrane fraction | GO:0005794 Golgi apparatus | GO:0000329 fungal-type vacuole membrane | GO:0005886 plasma membrane |
orf19.4826	2.73723	2.7712	2.63736	0.389174	0.755549	0.929108	IDH1	Predicted ORF in Assemblies 19, 20 and 21; soluble protein in hyphae; protein level decreased in stationary phase cultures	GO:0006099 tricarboxylic acid cycle | GO:0006102 isocitrate metabolic process | GO:0006537 glutamate biosynthetic process |	GO:0004449 isocitrate dehydrogenase (NAD+) activity |	GO:0005625 soluble fraction | GO:0005962 mitochondrial isocitrate dehydrogenase complex (NAD+) | GO:0042645 mitochondrial nucleoid |
orf19.6854	1.98582	2.13159	2.04296	0.481573	1.18374	1.09933	ATP1	Protein similar to alpha subunit of ATP synthase; antigenic in human, mouse; at surface of hyphae, not yeast-form; soluble protein in hyphae; induced by ciclopirox olamine, ketoconazole, or flucytosine; downregulated by Efg1p, caspofungin	GO:0006754 ATP biosynthetic process | GO:0015986 ATP synthesis coupled proton transport |	GO:0046961 proton-transporting ATPase activity, rotational mechanism | GO:0046933 hydrogen ion transporting ATP synthase activity, rotational mechanism | GO:0016887 ATPase activity |	GO:0030446 hyphal cell wall | GO:0009986 cell surface | GO:0005625 soluble fraction | GO:0005754 mitochondrial proton-transporting ATP synthase, catalytic core | GO:0042645 mitochondrial nucleoid | GO:0005886 plasma membrane |
orf19.7498	1.3217	2.09688	2.45248	0.685666	1.40456	1.02898	LEU1	Protein described as 3-isopropylmalate dehydratase; antigenic in human; decreased expression in hyphae compared to yeast-form cells; alkaline downregulated; upregulated in the presence of human whole blood or polymorphonuclear (PMN) cells	GO:0009098 leucine biosynthetic process |	GO:0003861 3-isopropylmalate dehydratase activity |	GO:0005625 soluble fraction |
orf19.1735	1.88097	2.07301	1.70569	0.899078	1.45317	2.16887		Predicted ORF in Assemblies 19, 20 and 21
orf19.446.2	2.02999	1.77776	1.99913	0.785973	1.41908	2.05013		Predicted ORF in Assembly 20 and 21; gene has intron
orf19.4495	2.79654	2.52731	2.44388	0.604041	2.02161	2.65923	NDH51	Subunit of nicotinamide adenine dinucleotide dehydrogenase complex I, of the mitochondrial electron transport chain; required for wild-type filamentous growth; alkaline downregulated	GO:0009060 aerobic respiration | GO:0030447 filamentous growth | GO:0042710 biofilm formation |	GO:0008137 NADH dehydrogenase (ubiquinone) activity |	GO:0005747 mitochondrial respiratory chain complex I | GO:0005624 membrane fraction | GO:0005886 plasma membrane |
orf19.2821	2.2468	2.68426	2.35614	0.7104	1.51502	1.87861		Predicted ORF in Assemblies 19, 20 and 21; repressed by nitric oxide
orf19.5231.2	1.82549	2.00507	2.02324	0.795656	1.24765	1.6398		ORF Predicted by Annotation Working Group	GO:0015986 ATP synthesis coupled proton transport |	GO:0046933 hydrogen ion transporting ATP synthase activity, rotational mechanism |	GO:0000276 mitochondrial proton-transporting ATP synthase complex, coupling factor F(o) | GO:0005886 plasma membrane |
orf19.2644	2.24246	2.51641	2.25931	0.740599	1.51384	1.55562	QCR2	Protein described as ubiquinol-cytochrome-c reductase; antigenic in human; transcriptionally induced by interaction with macrophage; repressed by nitric oxide; in detergent-resistant membrane fraction (possible lipid raft component)	GO:0006122 mitochondrial electron transport, ubiquinol to cytochrome c | GO:0009060 aerobic respiration |	GO:0008121 ubiquinol-cytochrome-c reductase activity |	GO:0005624 membrane fraction | GO:0005750 mitochondrial respiratory chain complex III | GO:0005886 plasma membrane |
orf19.5893	2.29082	2.1213	2.39887	0.639814	1.40868	1.86346	RIP1	Protein described as subunit of ubiquinol cytochrome c-reductase; transcriptionally regulated by iron; expression greater in high iron; alkaline downregulated; repressed by nitric oxide	GO:0006122 mitochondrial electron transport, ubiquinol to cytochrome c | GO:0009060 aerobic respiration |	GO:0008121 ubiquinol-cytochrome-c reductase activity |	GO:0005750 mitochondrial respiratory chain complex III | GO:0005886 plasma membrane |
orf19.3757	2.07284	2.17012	2.01738	0.679256	1.28796	1.83506	ATP20	Predicted ORF in Assemblies 19, 20 and 21; shows colony morphology-related gene regulation by Ssn6p; flucytosine induced; caspofungin repressed; macrophage/pseudohyphal-induced	GO:0042407 cristae formation | GO:0051259 protein oligomerization | GO:0015986 ATP synthesis coupled proton transport |	GO:0005198 structural molecule activity |	GO:0000276 mitochondrial proton-transporting ATP synthase complex, coupling factor F(o) | GO:0005886 plasma membrane |
orf19.1409.2	1.67663	1.7021	2.40525	0.804457	1.50501	2.20284		ORF added to Assembly 21 based on comparative genome analysis
orf19.1873	2.35438	2.06892	2.02497	0.79853	1.04011	1.33626		Predicted ORF in Assemblies 19, 20 and 21; repressed by nitric oxide; possibly spurious ORF (Annotation Working Group prediction)
orf19.5660.1	2.61934	2.20689	2.27079	0.719993	0.918757	1.51749		ORF Predicted by Annotation Working Group	GO:0042407 cristae formation | GO:0051259 protein oligomerization | GO:0015986 ATP synthesis coupled proton transport |	GO:0005198 structural molecule activity |	GO:0000276 mitochondrial proton-transporting ATP synthase complex, coupling factor F(o) |
orf19.4311	2.55693	2.65437	2.29307	0.687633	0.803393	1.41925	YNK1	Nucleoside diphosphate kinase (NDP kinase); homo-hexameric; soluble protein in hyphae; flucytosine induced; biofilm induced; macrophage-induced protein; protein detected by mass spec in stationary phase cultures	GO:0006165 nucleoside diphosphate phosphorylation | GO:0009142 nucleoside triphosphate biosynthetic process | GO:0006974 response to DNA damage stimulus |	GO:0004550 nucleoside diphosphate kinase activity |	GO:0005625 soluble fraction | GO:0005886 plasma membrane | GO:0005829 cytosol | GO:0005758 mitochondrial intermembrane space |
orf19.2270	2.09647	2.63031	3.22857	0.779806	0.941763	1.63288	SMF12	Protein not essential for viability; similar to S. cerevisiae Smf1p, which is a manganese transporter; Gcn4p-regulated; alkaline upregulated; caspofungin repressed	GO:0006828 manganese ion transport |	GO:0005384 manganese ion transmembrane transporter activity |	GO:0000324 fungal-type vacuole | GO:0005886 plasma membrane |
orf19.6139	13.9216	19.4995	10.6275	2.45722	1.62714	1.94206	FRE7	Protein similar to ferric reductase Fre10p; transcription is downregulated in response to treatment with ciclopirox olamine or 17-beta-estradiol; transcriptionally induced by alkaline conditions or interaction with macrophage	GO:0015892 siderophore-iron transport |	GO:0000293 ferric-chelate reductase activity |	GO:0005886 plasma membrane | GO:0016021 integral to membrane |
orf19.6578	2.46397	2.37097	2.4327	1.20783	1.21581	1.24682		Predicted membrane transporter, member of the vesicular neurotransmitter (VNT) family, major facilitator superfamily (MFS); downregulated in core caspofungin response	GO:0006817 phosphate transport | GO:0006836 neurotransmitter transport |	GO:0005315 inorganic phosphate transmembrane transporter activity | GO:0005326 neurotransmitter transporter activity |	GO:0005887 integral to plasma membrane | GO:0016020 membrane |
orf19.4674.1	4.22735	5.26469	5.24269	1.07885	1.53494	1.20792	CRD2	Metallothionein; role in adaptation to growth with high concentration of copper ions; basal transcription is cadmium-repressed; regulated by Ssn6p; complements copper sensitivity of an S. cerevisiae cup1 null mutant	GO:0006878 cellular copper ion homeostasis |	GO:0005507 copper ion binding |
orf19.4506	6.58309	11.3999	9.02222	1.50685	1.27577	1.31547	LYS22	Putative homocitrate synthase; fungal-specific (no human or murine homolog); repressed by nitric oxide; protein level decreased in stationary phase cultures	GO:0019878 lysine biosynthetic process via aminoadipic acid |	GO:0004410 homocitrate synthase activity |	GO:0005634 nucleus |
orf19.1394	1.86957	2.42086	2.20948	1.44098	1.05354	1.0196		Protein not essential for viability; protein level decreased in stationary phase cultures			GO:0005634 nucleus | GO:0005737 cytoplasm |
orf19.3646	11.7961	12.2252	9.68272	0.942161	1.8153	4.36972	CTR1	Copper transporter; probably multimeric; transcribed if copper limited; induced by Mac1p, macrophage interaction, alkaline pH via Rim101p; 17-beta-estradiol downregulated; complements S. cerevisiae ctr1 ctr3 copper transport mutant	GO:0006825 copper ion transport | GO:0015677 copper ion import | GO:0006827 high-affinity iron ion transport | GO:0006412 translation |	GO:0015088 copper uptake transmembrane transporter activity | GO:0005507 copper ion binding |	GO:0005886 plasma membrane |
orf19.5491.1	1.95739	2.15389	2.20292	1.03545	1.11535	1.46146	ATP14	ORF Predicted by Annotation Working Group; macrophage/pseudohyphal-induced	GO:0015986 ATP synthesis coupled proton transport |	GO:0046961 proton-transporting ATPase activity, rotational mechanism | GO:0046933 hydrogen ion transporting ATP synthase activity, rotational mechanism | GO:0016887 ATPase activity |	GO:0000276 mitochondrial proton-transporting ATP synthase complex, coupling factor F(o) |
orf19.3223	2.7854	3.24481	3.05882	1.0988	1.59186	1.57675	ATP3	Predicted ORF in Assemblies 19, 20 and 21; flucytosine induced; caspofungin repressed; macrophage/pseudohyphal-induced	GO:0015986 ATP synthesis coupled proton transport |	GO:0046961 proton-transporting ATPase activity, rotational mechanism | GO:0046933 hydrogen ion transporting ATP synthase activity, rotational mechanism | GO:0016887 ATPase activity |	GO:0005756 mitochondrial proton-transporting ATP synthase, central stalk | GO:0005886 plasma membrane |
orf19.5921	1.96735	2.37108	2.91539	1.18612	1.37123	1.70259		Predicted ORF in Assemblies 19, 20 and 21	GO:0006810 transport |	GO:0005215 transporter activity |
orf19.346	1.69301	2.54554	2.29598	1.29436	1.38715	1.17207		Predicted ORF in Assemblies 19, 20 and 21; mutation confers hypersensitivity to 5-fluorocytosine (5-FC)	GO:0042493 response to drug | GO:0006524 alanine catabolic process | GO:0006523 alanine biosynthetic process |	GO:0004021 L-alanine |	GO:0005739 mitochondrion |
orf19.3340	2.07769	3.30233	3.02806	1.92994	1.74417	1.04867	SOD2	Mitochondrial Mn-containing superoxide dismutase; protection against oxidative stress; active as homotetramer; N-terminal 34 amino acids removed upon mitochondrial import; H2O2-induced via Cap1p; alkaline downregulated, farnesol-induced	GO:0006800 oxygen and reactive oxygen species metabolic process | GO:0010226 response to lithium ion | GO:0001320 age-dependent response to reactive oxygen species during chronological cell aging | GO:0001302 replicative cell aging |	GO:0004784 superoxide dismutase activity |	GO:0005739 mitochondrion | GO:0005759 mitochondrial matrix |
orf19.7481	1.69421	2.3161	3.3751	1.57909	1.54076	1.43478	MDH1	Protein described as malate dehydrogenase, mitochondrial; transcription regulated by Mig1p and Tup1p, white-opaque switching; induced in high iron, biofilm; regulated upon phagocytosis; antigenic during murine or human infection	GO:0006099 tricarboxylic acid cycle | GO:0006108 malate metabolic process |	GO:0016615 malate dehydrogenase activity | GO:0004470 malic enzyme activity |	GO:0005739 mitochondrion | GO:0005625 soluble fraction | GO:0005759 mitochondrial matrix |
orf19.7077	2.15254	6.59615	4.00297	0.819121	1.183	1.16757		Protein with similarity to ferric reductases; transcription is activated by Mac1p under copper starvation; Plc1p-regulated; transcription is negatively regulated by Rim101p	GO:0015677 copper ion import | GO:0006826 iron ion transport |	GO:0000293 ferric-chelate reductase activity |	GO:0005886 plasma membrane |
orf19.376	1.41262	2.54855	3.53705	1.12407	1.12422	1.24512		Predicted ORF in Assemblies 19, 20 and 21
orf19.7091	2.31458	2.04122	1.49945	1.37964	0.983294	1.79673		Predicted ORF in Assemblies 19, 20 and 21; induced by nitric oxide
orf19.1215	2.12852	1.11735	2.40434	1.34797	1.26284	1.07278		Predicted ORF in Assemblies 19, 20 and 21
orf19.1473	8.97662	2.3526	0.992359	1.46483	1.47347	1.2619		Predicted ORF in Assemblies 19, 20 and 21; transcription is induced in response to alpha pheromone in SpiderM medium
orf19.7362	5.33473	2.36402	1.57386	0.810401	1.97424	1.30374	SKN1	Protein with predicted role in beta-1,6-glucan synthesis; probable N-glycosylated type II membrane protein; transcription and change in mRNA length induced by yeast-hyphal transition; transcription induced by Rim101p or caspofungin	GO:0006078 1,6-beta-glucan biosynthetic process |		GO:0016021 integral to membrane |

## Sheet: Complete dataset
Dye Swap ()*	green/red	red/green	green/red	red/green	green/red	red/green	green/red	red/green	green/red	red/green	green/red	red/green	green/red	red/green	green/red	red/green
Treatment	Compound 13	Compound 13	Compound 13	Compound 13	Compound 13	Compound 13	Compound 13	Compound 13	Compound 33	Compound 33	Compound 33	Compound 33	Compound 33	Compound 33	Compound 33	Compound 33
Time (min)	0	0	20	20	40	40	60	60	0	0	20	20	40	40	60	60	Common	Description	GO biological process	GO molecular function	GO cellular component
orf19.10	1.1	0.899996	0.706152	0.618591	0.367932	0.398068	0.338346	0.389231	1.01122	0.98878	0.743521	0.767388	0.463	0.408298	0.748156	0.592204	ALK8	Alkane-inducible cytochrome P450; catalyzes hydroxylation of lauric acid to hydroxylauric acid; overproduction causes fluconazole resistance in a wild-type background and causes multidrug resistance in a cdr1 cdr2 double mutant background	GO:0048252 lauric acid metabolic process | GO:0042493 response to drug | GO:0010430 fatty acid omega-oxidation |	GO:0019825 oxygen binding | GO:0020037 heme binding | GO:0008393 fatty acid (omega-1)-hydroxylase activity |	GO:0030176 integral to endoplasmic reticulum membrane |
orf19.100	0.8497	1.1503	0.777078	0.547568	0.874877	0.53658	0.896907	0.593211	0.730421	1.26958	0.597462	0.716809	0.403994	1.16411	0.489973	0.41396		Predicted ORF in Assemblies 19, 20 and 21
orf19.1002	0.875362	1.12464	0.667667	0.759613	0.791772	0.813493	1.07507	1.27914	0.779568	1.22043	0.521247	0.567152	0.648568	1.56583	0.582371	0.558164		Predicted ORF in Assemblies 19, 20 and 21; possibly spurious ORF (Annotation Working Group prediction)	GO:0007126 meiosis | GO:0007265 Ras protein signal transduction | GO:0007188 G-protein signaling, coupled to cAMP nucleotide second messenger |	GO:0004016 adenylate cyclase activity |	GO:0005886 plasma membrane |
orf19.1003	0.978785	1.02121	0.852083	0.80667	0.781557	0.745096	0.950843	0.843956	0.971546	1.02845	0.638447	0.775487	0.939734	0.696656	1.20424	1.02001		Predicted ORF from Assembly 19; merged with orf19.1005 in Assembly 20
orf19.1004	1.18294	0.817056	1.04818	0.98849	1.04775	0.884369	0.63685	0.70106	1.00905	0.990953	1.09936	0.667758	1.14947	1.33206	0.848707	0.637054		Predicted ORF from Assembly 19; removed from Assembly 20
orf19.1005	1.24906	0.750945	0.977265	0.617302	0.822009	0.631223	0.908193	0.629888	0.846178	1.15382	1.47716	1.92396	1.12235	0.879699	0.818162	0.6465		Predicted ORF in Assemblies 19, 20 and 21; transcription is upregulated in both intermediate and mature biofilms	GO:0007126 meiosis | GO:0007265 Ras protein signal transduction | GO:0007188 G-protein signaling, coupled to cAMP nucleotide second messenger |	GO:0004016 adenylate cyclase activity |	GO:0005886 plasma membrane |
orf19.1006	0.956676	1.04332	0.664247	0.969302	0.497425	0.602455	0.494808	0.688845	0.892631	1.10737	0.809038	0.701548	0.593597	1.32246	1.02463	0.893355		Protein lacking an ortholog in S. cerevisiae; transposon mutation affects filamentous growth; merged with orf19.562 in Assembly 20
orf19.1007	0.833466	1.16653	0.929098	1.27405	0.985077	1.39147	1.14612	1.28998	0.965807	1.03419	1.54929	1.28273	1.63883	1.78225	1.65274	1.63723		Putative transcription factor with bZIP DNA-binding motif	GO:0006950 response to stress | GO:0016049 cell growth | GO:0006355 regulation of transcription, DNA-dependent |	GO:0016301 kinase activity | GO:0003700 transcription factor activity |
orf19.1008	0.582175	1.41783	0.694989	1.00939	1.00988	0.941705	0.844267	1.56351	1.06614	0.933863	1.36215	2.75825	1.42922	0.805682	1.06182	1.08859		Predicted ORF in Assemblies 19, 20 and 21
orf19.1009	0.673733	1.32627	1.02155	1.88998	0.741595	1.4458	0.701774	1.34792	0.894079	1.10592	0.999626	1.58001	1.8648	1.78244	1.7804	2.22302		Predicted ORF in Assemblies 19, 20 and 21
orf19.101	0.777153	1.22285	0.350547	0.36063	0.24098	0.34862	0.408293	0.498907	0.596591	1.40341	0.446149	0.900574	0.219653	0.338968	0.317426	0.240311	RIM9	Protein required for alkaline pH response via the RIM101 signaling pathway; ortholog of S. cerevisiae RIM9 and A. nidulans palI	GO:0030437 ascospore formation | GO:0010226 response to lithium ion | GO:0010446 response to alkalinity | GO:0030447 filamentous growth |
orf19.1010	0.859169	1.14083	0.768663	1.00727	0.665118	0.945752	0.845295	0.869211	1.00878	0.991223	1.54922	1.8555	1.06783	1.45038	1.12176	1.15173	MNT3	Protein with similarity to mannosyltransferases; transcription is elevated in cyr1, chk1, nik1, and sln1 homozygous null mutants; fungal-specific (no human or murine homolog)	GO:0000032 cell wall mannoprotein biosynthetic process | GO:0006493 protein amino acid O-linked glycosylation | GO:0006491 N-glycan processing |	GO:0000026 alpha-1,2-mannosyltransferase activity |	GO:0005794 Golgi apparatus |
orf19.1011	0.941149	1.05885	0.668016	0.635712	0.682703	0.591587	0.654394	0.751243	0.955856	1.04414	0.912991	1.17738	0.920057	1.10229	0.820976	0.906593		Predicted ORF in Assemblies 19, 20 and 21	GO:0006486 protein amino acid glycosylation |	GO:0000026 alpha-1,2-mannosyltransferase activity |	GO:0005794 Golgi apparatus |
orf19.1012	1.21512	0.784882	1.10819	0.842214	1.1813	0.830796	0.960592	0.725189	1.02021	0.979787	1.01976	1.13973	1.25507	1.24277	1.24604	1.25974		Predicted ORF in Assemblies 19, 20 and 21	GO:0006896 Golgi to vacuole transport |	GO:0030276 clathrin binding |	GO:0030121 AP-1 adaptor complex |
orf19.1013	0.735081	1.26492	0.768527	0.800345	0.550442	1.00919	0.609876	1.0499	0.326848	1.67315	0.718039	1.17393	0.524266	1.24963	0.394738	0.68416		Predicted ORF from Assembly 19; merged with orf19.5289 in Assembly 20
orf19.1014	1.05969	0.94031	2.3273	0.40299	2.39688	1.97254	1.3565	1.59044	1.19743	0.802572	2.0856	2.75821	1.2909	1.56817	0.658807	0.818426		Predicted ORF from Assembly 19; removed from Assembly 20
orf19.1016	0.91842	1.08158	1.24678	1.34814	1.06062	1.41317	1.20066	1.16624	1.04961	0.950393	1.11421	0.729677	1.05657	0.976643	1.52802	1.41477		Predicted ORF from Assembly 19; removed from Assembly 20
orf19.1017	1.27818	0.721824	1.47591	0.961049	1.07851	0.816626	1.07208	0.611216	1.04536	0.954635	1.35593	1.2614	1.03593	1.41256	1.09102	0.842858		Predicted ORF from Assembly 19; removed from Assembly 20
orf19.1018	1.13015	0.869852	1.03266	0.695465	1.02731	0.751515	1.11443	0.736458	1.16477	0.83523	1.00773	0.673822	1.15916	0.875442	1.33275	0.966131		Predicted ORF from Assembly 19; removed from Assembly 20
orf19.1019	0.913551	1.08645	1.05207	0.999149	1.22992	1.00553	1.22855	1.41743	0.997623	1.00238	1.30539	1.50844	1.26499	1.6726	0.868584	0.901763		Predicted ORF from Assembly 19; removed from Assembly 20; merged with orf19.5718 in Assembly 21
orf19.102	0.871834	1.12817	1.21088	1.11832	0.985787	1.10732	1.36245	1.39821	1.00407	0.99593	1.22615	1.01515	1.76878	2.19901	1.93772	1.74722		Predicted ORF in Assemblies 19, 20 and 21; possibly spurious ORF (Annotation Working Group prediction)	GO:0007064 mitotic sister chromatid cohesion |		GO:0008278 cohesin complex |
orf19.1020	1.10174	0.898258	3.02264	1.74307	2.98808	1.52299	1.37614	1.06289	0.947017	1.05298	1.19639	1.13344	2.07915	1.79919	1.60634	1.4725		Predicted ORF from Assembly 19; removed from Assembly 20; merged with orf19.5719 in Assembly 21
orf19.1021	0.937481	1.06252	1.2055	0.793319	0.997408	0.936386	1.05041	0.922075	1.0112	0.988803	0.921886	0.904668	1.42544	1.01431	1.10188	1.19247		Predicted ORF from Assembly 19; removed from Assembly 20
orf19.1022	0.976591	1.02341	0.844638	0.80246	0.835924	0.852604	0.835703	0.881638	0.894652	1.10535	1.11278	1.59316	1.38457	1.31428	0.936068	1.10184		Predicted ORF from Assembly 19; removed from Assembly 20
orf19.1023	1.09748	0.902516	1.1882	1.14729	0.908342	1.01359	0.409137	1.68508	1.04179	0.95821	1.26393	1.24251	0.97168	0.812713	0.82333	1.10521		Predicted ORF from Assembly 19; possibly spurious ORF (Annotation Working Group prediction); removed from Assembly 20
orf19.1024	1.25669	0.743306	1.03954	0.807623	0.959654	0.86535	1.02563	1.07338	0.869668	1.13033	1.61598	1.24163	1.08793	0.717773	0.909864	1.16494		Predicted ORF from Assembly 19; removed from Assembly 20
orf19.1025																		Predicted ORF from Assembly 19; removed from Assembly 20
orf19.1026	1.00505	0.994947	0.957934	1.34614	0.913975	1.25659	0.819926	1.16992	0.906536	1.09346	0.669725	0.544957	0.855682	0.696093	0.946727	1.43024		Predicted ORF in Assemblies 19, 20 and 21	GO:0070481 nuclear-transcribed mRNA catabolic process, non-stop decay | GO:0000467 exonucleolytic trimming to generate mature 3'-end of 5.8S rRNA from tricistronic rRNA transcript (SSU-rRNA, 5.8S rRNA, LSU-rRNA) | GO:0034427 nuclear-transcribed mRNA catabolic process, exonucleolytic, 3'-5' | GO:0000292 RNA fragment catabolic process |	GO:0000175 3'-5'-exoribonuclease activity |	GO:0000177 cytoplasmic exosome (RNase complex) | GO:0000176 nuclear exosome (RNase complex) |
orf19.1026.1	1.03778	0.96222	1.10673	1.15148	0.895628	1.11011	0.902035	1.00015	0.901074	1.09893	1.35522	0.917951	0.989453	1.21466	1.1246	1.34409		ORF added to Assembly 21 based on comparative genome analysis
orf19.1027	0.882822	1.11718	5.62976	3.4263	3.72788	2.92239	1.64051	1.94307	0.967976	1.03202	0.179414	0.229515	0.185551	0.177666	0.102812	0.090349	PDR16	Phosphatidylinositol transfer protein; increased transcription correlates with CDR1 and CDR2 overexpression and azole resistance; induced by fluphenazine, 17-beta-estradiol, ethynyl estradiol, nitric oxide; farnesol-downregulated in biofilm	GO:0042493 response to drug | GO:0016126 sterol biosynthetic process | GO:0015914 phospholipid transport |	GO:0008526 phosphatidylinositol transporter activity |	GO:0001950 plasma membrane enriched fraction | GO:0005811 lipid particle | GO:0005792 microsome |
[truncated: 6,776 more rows]
