# Supplementary material for: Identification and Characterization of Antifungal Compounds Using a Saccharomyces cerevisiae Reporter Bioassay
Source: PLoS One. 2012 May 4;7(5):e36021. doi: 10.1371/journal.pone.0036021 (PMC3344848; doi:10.1371/journal.pone.0036021)
Supplement: File S2 — GSEA results. Results of a gene set enrichment analysis (GSEA) [12] performed on the t = 20 min compound 13 and compound 33 data using the Preranked tool and the weighted enrichment statistics on 6387 gene sets each containing 5–500 genes. Statistical significance was estimated from 1000 permutations. Table lists enriched gene sets where the p-value is smalller or equal to 0.05 while the FDR is smaller or equal to 25%. A description of the GSEA statistics is provided at http://www.broadinstitute.org/gsea/doc/GSEAUserGuideFrame.html?_Interpreting_GSEA_Results. Each gene sets includes a suffix to indicate whether it originates from transcriptional profiles (_UP and _DN), GO Terms (_BIO, _CEL, _MOL), signaling pathways as defined by the Candida Genome Database (_PATH), transcription factor binding motifs (_MOTIF), the S. cerevisiae BIND protein-protein interaction database (_BIND), or S. cerevisiae genetic interaction groups (_SGA). (XLS) [file pone.0036021.s006.xls]

## Sheet: C13 Upregulated
File S2: Gene sets upregulated by Candida albicans after 20 min of treatment with compound 13
NAME	SIZE	ES	NES	NOM p-val	FDR q-val	FWER p-val	RANK AT MAX	LEADING EDGE
UPC2_DN	250	0.582614	3.19164	0	0	0	1205	tags=59%, list=19%, signal=70%
XS_UP	127	0.618671	3.18607	0	0	0	452	tags=38%, list=7%, signal=40%
YTM1_BIND	46	0.701266	3.12087	0	0	0	982	tags=76%, list=16%, signal=90%
NSA1_BIND	37	0.731045	3.11627	0	0	0	927	tags=78%, list=15%, signal=91%
NUCLEOLUS_CEL	110	0.61093	3.10118	0	0	0	1699	tags=81%, list=27%, signal=109%
RLP7_BIND	58	0.659227	3.06752	0	0	0	1156	tags=76%, list=18%, signal=92%
TIF6_BIND	61	0.664534	3.02478	0	0	0	1156	tags=74%, list=18%, signal=90%
NIP7_BIND	46	0.681523	3.00452	0	0	0	1156	tags=80%, list=18%, signal=98%
ERB1_BIND	63	0.63889	2.97135	0	0	0	1156	tags=71%, list=18%, signal=87%
NOP2_BIND	53	0.654716	2.94284	0	0	0	1547	tags=81%, list=25%, signal=107%
CAT8P_TFMOTIF	36	0.688629	2.93113	0	0	0	510	tags=56%, list=8%, signal=60%
NSA2_BIND	25	0.746246	2.88107	0	0	0	945	tags=80%, list=15%, signal=94%
BIOFILMBATCH_DN	113	0.565771	2.86941	0	0	0	952	tags=50%, list=15%, signal=57%
HYPHAE FBS37 (NANTEL)_UP	123	0.559783	2.84974	0	0	0	945	tags=55%, list=15%, signal=64%
SPB4_BIND	21	0.764223	2.84668	0	0	0	844	tags=86%, list=13%, signal=99%
NOG1_BIND	79	0.588502	2.83545	0	0	0	1217	tags=66%, list=19%, signal=81%
RPF1_BIND	31	0.682653	2.82956	0	0	0	1079	tags=74%, list=17%, signal=89%
NOC2_BIND	59	0.604348	2.82301	0	0	0	1486	tags=75%, list=24%, signal=97%
NOC3_BIND	38	0.659817	2.8191	0	0	0	1581	tags=84%, list=25%, signal=112%
BRX1_BIND	65	0.599052	2.81468	0	0	0	1486	tags=74%, list=24%, signal=96%
CIC1_BIND	55	0.610795	2.79456	0	0	0	1113	tags=67%, list=18%, signal=81%
RIBOSOMAL LARGE SUBUNIT BIOGENESIS AND ASSEMBLY_BIO	38	0.650836	2.78449	0	0	0	844	tags=68%, list=13%, signal=79%
HAS1_BIND	85	0.567819	2.77682	0	0	0	982	tags=60%, list=16%, signal=70%
NOP7_BIND	58	0.592923	2.75068	0	0	0	1113	tags=64%, list=18%, signal=77%
DRS1_BIND	44	0.620622	2.74061	0	4.01262e-05	0.001	1113	tags=66%, list=18%, signal=80%
RRNA METABOLIC PROCESS_BIO	97	0.548881	2.73171	0	7.71024e-05	0.002	1405	tags=67%, list=22%, signal=85%
RSA4_BIND	21	0.737043	2.72795	0	7.42467e-05	0.002	1068	tags=86%, list=17%, signal=103%
MAK21_BIND	25	0.695187	2.72272	0	7.15951e-05	0.002	1547	tags=88%, list=25%, signal=116%
RPL5_BIND	79	0.557189	2.71873	0	6.91263e-05	0.002	1156	tags=61%, list=18%, signal=74%
RRNA PROCESSING_BIO	94	0.548657	2.69567	0	6.68221e-05	0.002	1405	tags=67%, list=22%, signal=85%
HS_DN	224	0.497916	2.68599	0	6.46665e-05	0.002	1765	tags=62%, list=28%, signal=83%
NUCLEOLAR PART_CEL	47	0.601515	2.67811	0	6.26457e-05	0.002	1861	tags=85%, list=30%, signal=120%
RIBOSOME BIOGENESIS AND ASSEMBLY_BIO	142	0.518491	2.67268	0	6.07473e-05	0.002	1405	tags=63%, list=22%, signal=79%
DBP10_BIND	26	0.679197	2.66724	0	5.89607e-05	0.002	1242	tags=81%, list=20%, signal=100%
PSEUDOMONAS_UP	78	0.544855	2.66325	0	5.72761e-05	0.002	970	tags=45%, list=15%, signal=52%
YAK1_H_DN	282	0.480981	2.65353	0	5.56851e-05	0.002	1322	tags=44%, list=21%, signal=54%
NUG1_BIND	54	0.582689	2.64768	0	5.41801e-05	0.002	1203	tags=65%, list=19%, signal=79%
NOP4_BIND	44	0.59699	2.64521	0	5.27543e-05	0.002	1486	tags=73%, list=24%, signal=95%
RPF2_BIND	50	0.575945	2.64081	0	5.14016e-05	0.002	927	tags=58%, list=15%, signal=68%
RRP1_BIND	37	0.602325	2.62851	0	5.01166e-05	0.002	927	tags=57%, list=15%, signal=66%
TAC1_DN	54	0.576954	2.61977	0	4.88942e-05	0.002	419	tags=28%, list=7%, signal=30%
RIX7_BIND	22	0.684009	2.61348	0	4.77301e-05	0.002	1636	tags=91%, list=26%, signal=123%
PMT5_P5-571_UP	25	0.682624	2.61291	0	4.66201e-05	0.002	747	tags=64%, list=12%, signal=72%
RRP5_BIND	88	0.536766	2.59366	0	9.12967e-05	0.004	1347	tags=64%, list=21%, signal=80%
UTP10_BIND	41	0.593523	2.58921	0	8.92679e-05	0.004	2176	tags=90%, list=35%, signal=137%
DBP9_BIND	24	0.668373	2.57662	0	0.000130973	0.006	1513	tags=83%, list=24%, signal=109%
RPL7B_BIND	52	0.551796	2.57588	0	0.000128186	0.006	982	tags=58%, list=16%, signal=68%
ADA2_TF	175	0.4832	2.57392	0	0.000125516	0.006	448	tags=24%, list=7%, signal=25%
CSR_UP	19	0.713446	2.56638	0	0.000143531	0.007	686	tags=32%, list=11%, signal=35%
PROCESSING OF 20S PRE-RRNA_BIO	27	0.649211	2.56319	0	0.00014066	0.007	1765	tags=89%, list=28%, signal=123%
ELECTRON CARRIER ACTIVITY_MOL	27	0.63137	2.53476	0	0.000236517	0.012	532	tags=41%, list=8%, signal=44%
SMALL NUCLEOLAR RIBONUCLEOPROTEIN COMPLEX_CEL	27	0.648596	2.53161	0	0.000231968	0.012	1765	tags=89%, list=28%, signal=123%
SIT4_HYPHAE_DN	97	0.510305	2.53133	0	0.000227592	0.012	1684	tags=64%, list=27%, signal=86%
EBP2_BIND	44	0.560682	2.52302	0	0.000372406	0.02	844	tags=57%, list=13%, signal=65%
RRP9_BIND	30	0.621236	2.50909	0	0.000438635	0.024	1184	tags=73%, list=19%, signal=90%
IPI3_BIND	17	0.708195	2.50153	0	0.000466729	0.025	1068	tags=82%, list=17%, signal=99%
TRICARBOXYLIC ACID CYCLE INTERMEDIATE METABOLIC PROCESS_BIO	20	0.679091	2.49103	0	0.000511556	0.028	606	tags=55%, list=10%, signal=61%
TRICARBOXYLIC ACID CYCLE_BIO	15	0.739043	2.48687	0	0.000520027	0.029	583	tags=67%, list=9%, signal=73%
CD(HOG1)_UP	64	0.533727	2.47474	0	0.000579415	0.033	428	tags=27%, list=7%, signal=28%
COFACTOR CATABOLIC PROCESS_BIO	16	0.710486	2.47172	0	0.000586452	0.034	583	tags=63%, list=9%, signal=69%
NOP56_BIND	70	0.51463	2.46995	0	0.000626399	0.037	2236	tags=79%, list=36%, signal=121%
ACETYL-COA CATABOLIC PROCESS_BIO	15	0.739043	2.46558	0	0.000616295	0.037	583	tags=67%, list=9%, signal=73%
TSA1_Â·-MEM_UP	12	0.792528	2.46519	0	0.000606513	0.037	256	tags=33%, list=4%, signal=35%
SNORNA BINDING_MOL	28	0.624506	2.45293	0	0.000738336	0.046	1382	tags=79%, list=22%, signal=100%
PMN PHAGOCYTOSIS_UP	178	0.466591	2.45092	0	0.000726977	0.046	938	tags=30%, list=15%, signal=35%
PWY3B3-100_PATH	15	0.719852	2.44973	0	0.000761684	0.048	571	tags=60%, list=9%, signal=66%
OXIDOREDUCTASE ACTIVITY, ACTING ON NADH OR NADPH_MOL	22	0.6615	2.44745	0	0.000855323	0.054	785	tags=45%, list=13%, signal=52%
RIX1_BIND	28	0.611334	2.44364	0.00106045	0.000916616	0.059	1068	tags=68%, list=17%, signal=81%
MONOVALENT INORGANIC CATION TRANSPORT_BIO	14	0.727597	2.44135	0	0.000932411	0.061	1061	tags=71%, list=17%, signal=86%
CD_UP	96	0.497213	2.44059	0	0.000919091	0.061	755	tags=27%, list=12%, signal=30%
YAK1_Y_DN	190	0.454878	2.43886	0	0.000906146	0.061	1324	tags=41%, list=21%, signal=50%
RAS1_HYPHAE_UP	34	0.591351	2.43873	0	0.00089356	0.061	622	tags=41%, list=10%, signal=45%
OXIDATIVE PHOSPHORYLATION_BIO	23	0.639501	2.43269	0	0.000908902	0.063	1061	tags=65%, list=17%, signal=78%
CAP2_UP	372	0.433072	2.426	0	0.00103256	0.073	1371	tags=47%, list=22%, signal=56%
SCL1_BIND	38	0.551202	2.41772	0	0.00119298	0.085	2373	tags=89%, list=38%, signal=143%
RPL27A_BIND	54	0.525112	2.41599	0	0.00120381	0.087	943	tags=56%, list=15%, signal=65%
COENZYME CATABOLIC PROCESS_BIO	16	0.710486	2.41415	0	0.00122729	0.09	583	tags=63%, list=9%, signal=69%
CSR_DN	37	0.55947	2.41035	0	0.00130163	0.097	1184	tags=59%, list=19%, signal=73%
PRE6_BIND	41	0.556518	2.40218	0	0.00146326	0.109	2373	tags=90%, list=38%, signal=144%
PURINE RIBONUCLEOSIDE TRIPHOSPHATE METABOLIC PROCESS_BIO	10	0.797249	2.40124	0	0.0014827	0.112	443	tags=70%, list=7%, signal=75%
XS(HOG1)_UP	465	0.417686	2.40042	0	0.00148926	0.114	970	tags=28%, list=15%, signal=31%
ATP METABOLIC PROCESS_BIO	10	0.797249	2.39953	0	0.00148339	0.114	443	tags=70%, list=7%, signal=75%
RPL3_BIND	105	0.475639	2.39835	0	0.00148962	0.116	1158	tags=52%, list=18%, signal=63%
GROUP TRANSFER COENZYME METABOLIC PROCESS_BIO	21	0.651248	2.3945	0	0.0016393	0.129	443	tags=48%, list=7%, signal=51%
DFG16_DN	25	0.615724	2.38815	0	0.00176204	0.139	383	tags=36%, list=6%, signal=38%
RIBONUCLEOPROTEIN COMPLEX BIOGENESIS AND ASSEMBLY_BIO	182	0.446485	2.38337	0	0.00186998	0.15	1906	tags=63%, list=30%, signal=88%
RIBONUCLEOSIDE TRIPHOSPHATE METABOLIC PROCESS_BIO	10	0.797249	2.37943	0	0.00195267	0.158	443	tags=70%, list=7%, signal=75%
NAN1_BIND	43	0.534248	2.37071	0	0.00218129	0.178	1382	tags=65%, list=22%, signal=83%
RRS1_BIND	38	0.562135	2.36828	0	0.00224705	0.184	1547	tags=68%, list=25%, signal=90%
CDC5_2H_UP	63	0.509176	2.36727	0	0.00222208	0.184	982	tags=41%, list=16%, signal=48%
PURINE NUCLEOSIDE TRIPHOSPHATE BIOSYNTHETIC PROCESS_BIO	10	0.797249	2.36536	0	0.0022751	0.19	443	tags=70%, list=7%, signal=75%
PURINE RIBONUCLEOSIDE TRIPHOSPHATE BIOSYNTHETIC PROCESS_BIO	10	0.797249	2.3605	0	0.00240336	0.199	443	tags=70%, list=7%, signal=75%
RIBONUCLEOSIDE TRIPHOSPHATE BIOSYNTHETIC PROCESS_BIO	10	0.797249	2.35853	0	0.00248557	0.208	443	tags=70%, list=7%, signal=75%
ATP BIOSYNTHETIC PROCESS_BIO	10	0.797249	2.35765	0	0.00249115	0.21	443	tags=70%, list=7%, signal=75%
NUCLEOSIDE PHOSPHATE METABOLIC PROCESS_BIO	10	0.797249	2.34823	0	0.00281393	0.236	443	tags=70%, list=7%, signal=75%
CD_DN	76	0.48669	2.34458	0	0.00293086	0.247	1214	tags=54%, list=19%, signal=66%
OXYGEN AND REACTIVE OXYGEN SPECIES METABOLIC PROCESS_BIO	47	0.523403	2.34073	0	0.00314979	0.267	785	tags=34%, list=13%, signal=39%
PURINE NUCLEOSIDE TRIPHOSPHATE METABOLIC PROCESS_BIO	10	0.797249	2.34	0	0.00311765	0.267	443	tags=70%, list=7%, signal=75%
LOC1_BIND	25	0.611346	2.33988	0	0.00308616	0.267	1072	tags=64%, list=17%, signal=77%
CLA37_UP	143	0.45517	2.33659	0	0.00321604	0.277	1324	tags=34%, list=21%, signal=42%
GLUTAMINE FAMILY AMINO ACID METABOLIC PROCESS_BIO	36	0.543519	2.33644	0	0.0031842	0.277	741	tags=44%, list=12%, signal=50%
ION TRANSPORT_BIO	85	0.474841	2.33565	0	0.00318249	0.279	1109	tags=40%, list=18%, signal=48%
NOC4_BIND	39	0.545658	2.33283	0	0.00320038	0.282	1184	tags=62%, list=19%, signal=75%
BMS1_BIND	47	0.519377	2.3299	0	0.00334344	0.297	1184	tags=60%, list=19%, signal=73%
PRE3_BIND	31	0.573598	2.32441	0	0.00357973	0.318	2322	tags=90%, list=37%, signal=143%
PUP2_BIND	37	0.542832	2.32318	0	0.00360272	0.321	2373	tags=86%, list=38%, signal=138%
RPN11_BIND	44	0.53501	2.32224	0	0.00360664	0.323	2373	tags=86%, list=38%, signal=138%
NOP16_BIND	30	0.576037	2.31946	0	0.00370363	0.334	1486	tags=70%, list=24%, signal=91%
RRP12_BIND	58	0.498805	2.31533	0	0.00390005	0.355	2469	tags=81%, list=39%, signal=132%
NOP58_BIND	36	0.543464	2.31495	0	0.00388287	0.357	2176	tags=81%, list=35%, signal=123%
NUCLEOSIDE TRIPHOSPHATE BIOSYNTHETIC PROCESS_BIO	11	0.764422	2.31414	0	0.0039022	0.362	443	tags=64%, list=7%, signal=68%
ACETYL-COA METABOLIC PROCESS_BIO	25	0.600784	2.31339	0	0.00388528	0.364	1165	tags=60%, list=19%, signal=73%
MRT4_BIND	106	0.463723	2.3105	0	0.00402007	0.378	1124	tags=51%, list=18%, signal=61%
NOP15_BIND	64	0.489331	2.30949	0	0.00402	0.381	1492	tags=61%, list=24%, signal=79%
ENERGY COUPLED PROTON TRANSPORT, DOWN ELECTROCHEMICAL GRADIENT_BIO	9	0.800637	2.30321	0	0.00445715	0.411	443	tags=78%, list=7%, signal=84%
SDA1_BIND	19	0.643388	2.30309	0	0.00441873	0.411	945	tags=68%, list=15%, signal=80%
CCR4_UP	164	0.435701	2.29919	0	0.00463836	0.431	812	tags=34%, list=13%, signal=38%
XS(2006)_UP	439	0.405142	2.29753	0	0.00467569	0.436	970	tags=24%, list=15%, signal=26%
PROTON TRANSPORT_BIO	9	0.800637	2.29741	0	0.0046364	0.436	443	tags=78%, list=7%, signal=84%
UTP6_BIND	23	0.592826	2.29576	0	0.00465637	0.441	2164	tags=87%, list=34%, signal=132%
RIBOSOMAL LARGE SUBUNIT ASSEMBLY AND MAINTENANCE_BIO	24	0.596129	2.29508	0	0.00468419	0.445	1547	tags=75%, list=25%, signal=99%
OXIDOREDUCTASE ACTIVITY_MOL	227	0.422308	2.28765	0	0.0050494	0.473	817	tags=27%, list=13%, signal=30%
ATP SYNTHESIS COUPLED PROTON TRANSPORT_BIO	9	0.800637	2.28685	0	0.00507372	0.477	443	tags=78%, list=7%, signal=84%
PRE8_BIND	32	0.561296	2.28603	0	0.00507338	0.479	2373	tags=91%, list=38%, signal=145%
PRE5_BIND	39	0.539708	2.28313	0	0.0052179	0.489	2423	tags=90%, list=39%, signal=145%
GLUTAMATE METABOLIC PROCESS_BIO	16	0.669581	2.27974	0	0.00540788	0.506	606	tags=50%, list=10%, signal=55%
HYDROGEN TRANSPORT_BIO	9	0.800637	2.27968	0	0.00537317	0.507	443	tags=78%, list=7%, signal=84%
TAC1_TF	36	0.546607	2.2778	0	0.00551155	0.518	1202	tags=42%, list=19%, signal=51%
MITOCHONDRIAL PROTON-TRANSPORTING ATP SYNTHASE COMPLEX_CEL	10	0.747359	2.26535	0	0.00633336	0.574	443	tags=70%, list=7%, signal=75%
COMPLETE-ARO_PATH	13	0.70905	2.26509	0	0.00630007	0.575	794	tags=69%, list=13%, signal=79%
PRE7_BIND	25	0.592651	2.2649	0.00107296	0.00626738	0.576	2373	tags=96%, list=38%, signal=154%
NOP12_BIND	108	0.451243	2.26344	0	0.00636464	0.585	1545	tags=57%, list=25%, signal=75%
35S PRIMARY TRANSCRIPT PROCESSING_BIO	44	0.512376	2.26317	0	0.00636214	0.589	2077	tags=77%, list=33%, signal=115%
ARX1_BIND	53	0.491895	2.2584	0	0.00671173	0.61	1114	tags=53%, list=18%, signal=64%
SPB1_BIND	18	0.641073	2.25818	0	0.00666944	0.61	927	tags=67%, list=15%, signal=78%
NUCLEOSIDE TRIPHOSPHATE METABOLIC PROCESS_BIO	12	0.719395	2.25808	0	0.00662777	0.611	443	tags=58%, list=7%, signal=63%
RPL4A_BIND	55	0.48971	2.25757	0	0.00662338	0.612	1513	tags=60%, list=24%, signal=78%
RLP24_BIND	19	0.640149	2.25523	0.00110132	0.00670642	0.619	709	tags=63%, list=11%, signal=71%
FPR4_BIND	43	0.523254	2.25084	0	0.00700517	0.638	1486	tags=63%, list=24%, signal=82%
HU_2H_UP	146	0.431054	2.24032	0	0.0080321	0.684	1897	tags=50%, list=30%, signal=70%
CD(HOG1)_DN	19	0.628597	2.23592	0	0.0084382	0.704	945	tags=63%, list=15%, signal=74%
ATPASE ACTIVITY, COUPLED TO TRANSMEMBRANE MOVEMENT OF SUBSTANCES_MOL	56	0.479467	2.23557	0	0.0084071	0.705	1061	tags=41%, list=17%, signal=49%
PUP1_BIND	32	0.546124	2.23321	0	0.00862252	0.718	2373	tags=88%, list=38%, signal=140%
ANTIOXIDANT ACTIVITY_MOL	14	0.682006	2.23036	0	0.00877917	0.723	532	tags=36%, list=8%, signal=39%
RESPONSE TO OXIDATIVE STRESS_BIO	46	0.513785	2.22192	0	0.00958495	0.758	785	tags=33%, list=13%, signal=37%
CATION TRANSPORT_BIO	69	0.4655	2.21656	0	0.0101183	0.784	1109	tags=39%, list=18%, signal=47%
PROTEASOME COMPLEX (SENSU EUKARYOTA)_CEL	42	0.506737	2.21016	0	0.0108431	0.805	2373	tags=83%, list=38%, signal=133%
PNO1_BIND	26	0.548539	2.2088	0	0.0109599	0.81	2164	tags=81%, list=34%, signal=123%
RPN3_BIND	43	0.502958	2.20681	0	0.0111088	0.816	2518	tags=86%, list=40%, signal=143%
PROTON-TRANSPORTING ATP SYNTHASE COMPLEX_CEL	10	0.747359	2.20591	0.00124844	0.0111622	0.821	443	tags=70%, list=7%, signal=75%
ATPASE ACTIVITY, COUPLED TO MOVEMENT OF SUBSTANCES_MOL	56	0.479467	2.20462	0	0.0112081	0.822	1061	tags=41%, list=17%, signal=49%
TSA1_UP	6	0.876001	2.2022	0	0.0114387	0.826	11	tags=33%, list=0%, signal=33%
BMDM PHAGOCYTOSIS_UP	460	0.387547	2.1995	0	0.0117845	0.838	856	tags=23%, list=14%, signal=25%
HYDROLASE ACTIVITY, ACTING ON ACID ANHYDRIDES, CATALYZING TRANSMEMBRANE MOVEMENT OF SUBSTANCES_MOL	56	0.479467	2.19825	0	0.0118711	0.84	1061	tags=41%, list=17%, signal=49%
DIP2_BIND	27	0.550036	2.19786	0	0.0118593	0.842	2164	tags=81%, list=34%, signal=124%
HYPHAE_UP	195	0.40763	2.19766	0	0.0118156	0.843	1637	tags=42%, list=26%, signal=55%
PRE4_BIND	25	0.567576	2.19718	0	0.0117531	0.844	1513	tags=76%, list=24%, signal=100%
UTP18_BIND	14	0.670181	2.19565	0	0.0118948	0.852	1765	tags=93%, list=28%, signal=129%
ADENYL NUCLEOTIDE BINDING_MOL	28	0.544494	2.19563	0	0.01182	0.852	764	tags=43%, list=12%, signal=49%
GLUTAMINE FAMILY AMINO ACID BIOSYNTHETIC PROCESS_BIO	22	0.584651	2.1929	0.0010661	0.0121294	0.858	741	tags=50%, list=12%, signal=56%
PROTON-TRANSPORTING ATP SYNTHASE COMPLEX, COUPLING FACTOR F(O)_CEL	8	0.778574	2.18926	0	0.012572	0.866	443	tags=75%, list=7%, signal=81%
RPN7_BIND	37	0.511467	2.18895	0.00103093	0.0125502	0.869	2847	tags=95%, list=45%, signal=172%
RPT2_BIND	34	0.521995	2.18599	0	0.0129106	0.88	2507	tags=88%, list=40%, signal=146%
COENZYME BIOSYNTHETIC PROCESS_BIO	33	0.519243	2.18302	0	0.0133589	0.893	443	tags=33%, list=7%, signal=36%
GLR1_BIND	13	0.674435	2.18014	0	0.0136859	0.902	532	tags=38%, list=8%, signal=42%
CDC5_4H_DN	133	0.423501	2.18001	0	0.0136278	0.903	1585	tags=46%, list=25%, signal=60%
PHOSPHOLIPID TRANSPORTER ACTIVITY_MOL	18	0.61232	2.17883	0.00110497	0.0137868	0.906	959	tags=50%, list=15%, signal=59%
UTP21_BIND	29	0.551269	2.17511	0	0.0141654	0.912	2164	tags=83%, list=34%, signal=126%
MDN1_BIND	33	0.520239	2.1742	0	0.0142302	0.913	1255	tags=58%, list=20%, signal=72%
CDC5_7H_DN	336	0.390081	2.17243	0	0.0143889	0.916	1915	tags=54%, list=31%, signal=73%
ENP2_BIND	24	0.572031	2.16836	0	0.0149867	0.923	1113	tags=63%, list=18%, signal=76%
PUF6_BIND	81	0.441518	2.16681	0	0.0151802	0.926	850	tags=44%, list=14%, signal=51%
OXIDOREDUCTASE ACTIVITY, ACTING ON THE ALDEHYDE OR OXO GROUP OF DONORS_MOL	17	0.619712	2.16636	0	0.0151853	0.927	300	tags=47%, list=5%, signal=49%
URA2_BIND	47	0.484751	2.16383	0	0.0156007	0.932	1593	tags=60%, list=25%, signal=79%
URB1_BIND	20	0.589962	2.16338	0.00107643	0.0155862	0.933	2176	tags=85%, list=35%, signal=130%
ATP BINDING_MOL	28	0.544494	2.16279	0	0.0155719	0.933	764	tags=43%, list=12%, signal=49%
RIBOSOME ASSEMBLY_BIO	31	0.538897	2.16267	0.00104167	0.0155066	0.933	1360	tags=65%, list=22%, signal=82%
UTP15_BIND	39	0.498903	2.15843	0	0.0161308	0.941	1765	tags=67%, list=28%, signal=92%
MAK5_BIND	21	0.584595	2.15227	0	0.0171351	0.951	749	tags=57%, list=12%, signal=65%
GAR1_BIND	22	0.579673	2.15177	0.0021254	0.0171236	0.951	2024	tags=82%, list=32%, signal=120%
ALB1_BIND	13	0.678924	2.15069	0.00111607	0.0171844	0.951	1094	tags=77%, list=17%, signal=93%
PMT2/PMT2_UP	9	0.747463	2.15059	0	0.0171065	0.952	749	tags=67%, list=12%, signal=76%
MITOCHONDRIAL PROTON-TRANSPORTING ATP SYNTHASE COMPLEX, COUPLING FACTOR F(O)_CEL	8	0.778574	2.14485	0	0.0179134	0.957	443	tags=75%, list=7%, signal=81%
CLA30_UP	84	0.440078	2.14465	0	0.0178542	0.957	1313	tags=38%, list=21%, signal=48%
RPL12A_BIND	28	0.545244	2.14079	0	0.0184752	0.967	1513	tags=68%, list=24%, signal=89%
DETOX1_PATH	7	0.785834	2.13974	0	0.0186191	0.968	339	tags=43%, list=5%, signal=45%
IRON ION HOMEOSTASIS_BIO	31	0.518804	2.13613	0.00105152	0.0192662	0.971	600	tags=26%, list=10%, signal=28%
MPP10_BIND	46	0.481664	2.13366	0	0.0196502	0.972	1184	tags=54%, list=19%, signal=66%
HYDRO-LYASE ACTIVITY_MOL	21	0.581666	2.13199	0	0.0198811	0.973	762	tags=52%, list=12%, signal=59%
PURINE RIBONUCLEOTIDE BIOSYNTHETIC PROCESS_BIO	17	0.604546	2.12663	0.00224719	0.0208234	0.977	443	tags=41%, list=7%, signal=44%
LIPID TRANSPORTER ACTIVITY_MOL	19	0.583172	2.12661	0	0.0207143	0.977	959	tags=47%, list=15%, signal=56%
GENERATION OF PRECURSOR METABOLITES AND ENERGY_BIO	120	0.412579	2.12444	0	0.0210724	0.979	1769	tags=45%, list=28%, signal=61%
HS_UP	153	0.40786	2.12121	0	0.0217072	0.981	771	tags=24%, list=12%, signal=27%
RPL4B_BIND	43	0.481914	2.11638	0	0.0228173	0.983	1762	tags=65%, list=28%, signal=90%
PEROXIDASE ACTIVITY_MOL	12	0.670005	2.11451	0	0.0231746	0.984	218	tags=25%, list=3%, signal=26%
RNA POLYMERASE COMPLEX_CEL	30	0.513705	2.11332	0.00104822	0.0232766	0.986	2493	tags=87%, list=40%, signal=143%
UTP13_BIND	30	0.530738	2.112	0	0.0234747	0.987	2164	tags=80%, list=34%, signal=122%
RRP14_BIND	13	0.645928	2.11099	0	0.0236047	0.987	1113	tags=69%, list=18%, signal=84%
NOP53_BIND	31	0.520991	2.11072	0.00206825	0.0235568	0.987	1246	tags=58%, list=20%, signal=72%
RIBOSOMAL SUBUNIT ASSEMBLY_BIO	29	0.518433	2.10873	0	0.0239061	0.988	1547	tags=66%, list=25%, signal=87%
UTP30_BIND	33	0.513033	2.10767	0	0.0240969	0.989	1148	tags=58%, list=18%, signal=70%
ENP1_BIND	25	0.542106	2.1043	0.00213675	0.0247981	0.992	882	tags=56%, list=14%, signal=65%
PROTEASOME CORE COMPLEX (SENSU EUKARYOTA)_CEL	15	0.631369	2.10425	0.00224215	0.0246907	0.992	2322	tags=100%, list=37%, signal=158%
ATP-DEPENDENT RNA HELICASE ACTIVITY_MOL	26	0.534752	2.09907	0.00104058	0.0258402	0.993	1547	tags=69%, list=25%, signal=91%
TRANSITION METAL ION HOMEOSTASIS_BIO	45	0.477328	2.09868	0	0.0258171	0.994	600	tags=27%, list=10%, signal=29%
RPL15B_BIND	10	0.700375	2.09782	0.00119332	0.0259502	0.994	1033	tags=80%, list=16%, signal=96%
RAS1_YEAST_UP	60	0.448738	2.09419	0	0.0267619	0.995	419	tags=17%, list=7%, signal=18%
DNA-DIRECTED RNA POLYMERASE COMPLEX_CEL	30	0.513705	2.09205	0.00105597	0.0271452	0.995	2493	tags=87%, list=40%, signal=143%
SKO1_DN	490	0.365567	2.09151	0	0.0271308	0.995	1792	tags=50%, list=29%, signal=64%
RNA-DEPENDENT ATPASE ACTIVITY_MOL	26	0.534752	2.09092	0.00106496	0.0271214	0.995	1547	tags=69%, list=25%, signal=91%
AMINO ACID CATABOLIC PROCESS_BIO	26	0.532969	2.09002	0.00316122	0.02725	0.997	129	tags=15%, list=2%, signal=16%
RIBONUCLEOTIDE BIOSYNTHETIC PROCESS_BIO	17	0.604546	2.08964	0.00113122	0.0272305	0.997	443	tags=41%, list=7%, signal=44%
OXIDOREDUCTASE ACTIVITY, ACTING ON PEROXIDE AS ACCEPTOR_MOL	12	0.670005	2.08895	0.00118064	0.0272964	0.997	218	tags=25%, list=3%, signal=26%
NUCLEAR DNA-DIRECTED RNA POLYMERASE COMPLEX_CEL	30	0.513705	2.08253	0.00103627	0.0290658	0.998	2493	tags=87%, list=40%, signal=143%
NOG2_BIND	35	0.496369	2.08108	0.00102564	0.0293703	0.999	1068	tags=51%, list=17%, signal=62%
AROMATIC COMPOUND BIOSYNTHETIC PROCESS_BIO	15	0.619935	2.08088	0	0.0292901	0.999	794	tags=53%, list=13%, signal=61%
CELLULAR RESPIRATION_BIO	67	0.437585	2.07891	0	0.0296738	0.999	1769	tags=54%, list=28%, signal=74%
WHITE_2_UP	414	0.370777	2.07579	0	0.03045	0.999	984	tags=23%, list=16%, signal=26%
RPN5_BIND	33	0.499821	2.07569	0	0.0303522	0.999	2507	tags=85%, list=40%, signal=141%
RPN8_BIND	47	0.469407	2.07099	0	0.0316255	0.999	2619	tags=83%, list=42%, signal=141%
AROMATIC AMINO ACID FAMILY BIOSYNTHETIC PROCESS_BIO	15	0.619935	2.06752	0.00348028	0.0325329	1	794	tags=53%, list=13%, signal=61%
LYS14P_TFMOTIF	30	0.517358	2.06724	0.00208986	0.0324453	1	722	tags=37%, list=12%, signal=41%
AMINE CATABOLIC PROCESS_BIO	27	0.52327	2.06658	0.0010627	0.0325881	1	129	tags=15%, list=2%, signal=15%
XS_DN	226	0.380965	2.0641	0	0.0332274	1	1136	tags=40%, list=18%, signal=47%
SOF1_BIND	24	0.549666	2.06322	0	0.0333433	1	1208	tags=63%, list=19%, signal=77%
RPL8B_BIND	91	0.416652	2.06156	0	0.0338537	1	2063	tags=63%, list=33%, signal=92%
DIM1_BIND	26	0.525571	2.06046	0.00106724	0.0340011	1	2164	tags=81%, list=34%, signal=123%
ECM16_BIND	35	0.488771	2.06013	0	0.0339578	1	2164	tags=74%, list=34%, signal=113%
NOB1_BIND	10	0.682004	2.0601	0.00243902	0.0338184	1	1290	tags=80%, list=21%, signal=101%
RPT5_BIND	46	0.461097	2.05983	0	0.0337763	1	1590	tags=61%, list=25%, signal=81%
RIM101_UP	10	0.686932	2.0577	0.00358423	0.0342782	1	334	tags=40%, list=5%, signal=42%
AROMATIC AMINO ACID FAMILY METABOLIC PROCESS_BIO	19	0.5673	2.05611	0.00218341	0.0346675	1	794	tags=47%, list=13%, signal=54%
COENZYME METABOLIC PROCESS_BIO	88	0.424482	2.05597	0	0.0345533	1	654	tags=30%, list=10%, signal=33%
RPT3_BIND	60	0.43697	2.05525	0	0.0346549	1	2847	tags=83%, list=45%, signal=151%
NADPH DEHYDROGENASE ACTIVITY_MOL	7	0.781658	2.05485	0	0.0346614	1	507	tags=43%, list=8%, signal=47%
GCN4_ONLY_UP	43	0.470033	2.05007	0.00102459	0.0361919	1	591	tags=30%, list=9%, signal=33%
PURINE NUCLEOTIDE BINDING_MOL	42	0.464898	2.04763	0	0.0368869	1	764	tags=36%, list=12%, signal=40%
RPL23A_BIND	29	0.507093	2.03954	0.0021097	0.039814	1	2275	tags=79%, list=36%, signal=124%
CELL FRACTION_CEL	119	0.391297	2.03923	0	0.0397819	1	1392	tags=40%, list=22%, signal=51%
AEROBIC RESPIRATION_BIO	66	0.433292	2.0355	0	0.041086	1	1769	tags=53%, list=28%, signal=73%
RPT1_BIND	49	0.451562	2.03488	0.00303644	0.04122	1	2847	tags=86%, list=45%, signal=156%
PRE2_BIND	33	0.497001	2.03423	0.00104058	0.0412906	1	2373	tags=82%, list=38%, signal=131%
LHP1_BIND	37	0.473933	2.03274	0	0.0418402	1	2575	tags=81%, list=41%, signal=137%
PURINE NUCLEOTIDE BIOSYNTHETIC PROCESS_BIO	20	0.552136	2.03002	0.00328228	0.0425996	1	1061	tags=45%, list=17%, signal=54%
TRANSITION METAL ION TRANSPORT_BIO	41	0.464384	2.02699	0	0.0435864	1	1109	tags=37%, list=18%, signal=44%
DNA-DIRECTED RNA POLYMERASE ACTIVITY_MOL	32	0.495539	2.02681	0	0.043499	1	2493	tags=84%, list=40%, signal=139%
KRE33_BIND	60	0.434375	2.02459	0	0.0442054	1	2176	tags=68%, list=35%, signal=104%
NAS6_BIND	20	0.567081	2.02254	0.00218341	0.044805	1	2027	tags=85%, list=32%, signal=125%
OXIDOREDUCTASE ACTIVITY, ACTING ON THE ALDEHYDE OR OXO GROUP OF DONORS, NAD OR NADP AS ACCEPTOR_MOL	14	0.609682	2.02072	0.00336323	0.0455251	1	230	tags=43%, list=4%, signal=44%
RCL1_BIND	14	0.617333	2.01909	0.00337838	0.0461064	1	1148	tags=71%, list=18%, signal=87%
PXR1_BIND	11	0.642786	2.0174	0.007109	0.0466438	1	1984	tags=91%, list=32%, signal=133%
EMG1_BIND	26	0.51355	2.01255	0.00105152	0.04858	1	2164	tags=77%, list=34%, signal=117%
RPN2_BIND	43	0.460951	2.01173	0.00102564	0.0486858	1	1611	tags=63%, list=26%, signal=84%
PROTON-TRANSPORTING TWO-SECTOR ATPASE COMPLEX, PROTON-TRANSPORTING DOMAIN_CEL	14	0.609959	2.01049	0.00344828	0.0490559	1	443	tags=50%, list=7%, signal=54%
DNA-DIRECTED RNA POLYMERASE I COMPLEX_CEL	13	0.626729	2.00948	0.00233918	0.0493286	1	1664	tags=85%, list=27%, signal=115%
NOP6_BIND	25	0.521742	2.00389	0.00427808	0.0519699	1	691	tags=48%, list=11%, signal=54%
RRNA MODIFICATION_BIO	15	0.589886	1.99778	0.00224719	0.0546533	1	1984	tags=87%, list=32%, signal=126%
NITROGEN COMPOUND CATABOLIC PROCESS_BIO	30	0.484411	1.99623	0.00103842	0.0552909	1	129	tags=13%, list=2%, signal=14%
GCN4_GCN2_UP	80	0.411519	1.99547	0	0.0554535	1	1631	tags=51%, list=26%, signal=68%
HYPHAL CELL WALL_CEL	18	0.569274	1.99544	0.00324324	0.0552596	1	476	tags=28%, list=8%, signal=30%
RPN12_BIND	36	0.476953	1.99331	0.00102775	0.0560914	1	2507	tags=81%, list=40%, signal=133%
UTP8_BIND	33	0.485132	1.99314	0.00104058	0.0559425	1	1449	tags=61%, list=23%, signal=78%
RPA49_BIND	34	0.473279	1.99169	0.00208768	0.0563866	1	1664	tags=59%, list=27%, signal=80%
DI-, TRI-VALENT INORGANIC CATION HOMEOSTASIS_BIO	50	0.440435	1.99137	0	0.0563329	1	1065	tags=32%, list=17%, signal=38%
FERRIC-CHELATE REDUCTASE ACTIVITY_MOL	15	0.597396	1.98869	0.00113122	0.0574553	1	20	tags=13%, list=0%, signal=13%
GLYOXYLATE-BYPASS_PATH	6	0.787481	1.98825	0.00413793	0.0574546	1	313	tags=50%, list=5%, signal=53%
NUCLEOTIDE BINDING_MOL	46	0.450322	1.98806	0	0.0573034	1	764	tags=35%, list=12%, signal=39%
PRE10_BIND	39	0.460177	1.98643	0	0.0579446	1	2477	tags=79%, list=39%, signal=130%
CARBOXY-LYASE ACTIVITY_MOL	13	0.605471	1.98477	0.00464037	0.0586035	1	429	tags=23%, list=7%, signal=25%
RPL17A_BIND	50	0.443262	1.98385	0.00201816	0.0588407	1	2176	tags=68%, list=35%, signal=103%
RPT6_BIND	62	0.425785	1.98323	0	0.0589682	1	2373	tags=73%, list=38%, signal=116%
PROTEASOME REGULATORY PARTICLE (SENSU EUKARYOTA)_CEL	20	0.551822	1.98088	0.00325027	0.0600479	1	1590	tags=75%, list=25%, signal=100%
RPL7A_BIND	45	0.446089	1.97969	0.00101112	0.0604832	1	781	tags=42%, list=12%, signal=48%
RPL20A_BIND	69	0.418463	1.97844	0	0.0610328	1	2176	tags=65%, list=35%, signal=99%
CA21CHRRX8	104	0.396756	1.97812	0	0.06099	1	1028	tags=31%, list=16%, signal=36%
PURINE RIBONUCLEOTIDE METABOLIC PROCESS_BIO	19	0.550034	1.97209	0.00222222	0.0641337	1	443	tags=37%, list=7%, signal=40%
CARBON-OXYGEN LYASE ACTIVITY_MOL	28	0.489114	1.97042	0.00315126	0.0648056	1	794	tags=43%, list=13%, signal=49%
OXIDOREDUCTASE ACTIVITY, ACTING ON DIPHENOLS AND RELATED SUBSTANCES AS DONORS_MOL	10	0.666482	1.96793	0.00372671	0.0659713	1	1709	tags=90%, list=27%, signal=123%
PUT3P_TFMOTIF	154	0.37514	1.96448	0	0.0677199	1	1311	tags=32%, list=21%, signal=40%
RIBONUCLEOTIDE METABOLIC PROCESS_BIO	19	0.550034	1.96442	0.00440044	0.0675175	1	443	tags=37%, list=7%, signal=40%
SOLUBLE FRACTION_CEL	66	0.418806	1.96371	0	0.0676919	1	1392	tags=41%, list=22%, signal=52%
RNA MODIFICATION_BIO	31	0.484372	1.96353	0.00103093	0.067523	1	2311	tags=77%, list=37%, signal=122%
XENOBIOTIC-TRANSPORTING ATPASE ACTIVITY_MOL	7	0.745606	1.9624	0.00258732	0.0679058	1	382	tags=43%, list=6%, signal=46%
OXIDOREDUCTASE ACTIVITY, OXIDIZING METAL IONS, NAD OR NADP AS ACCEPTOR_MOL	17	0.558214	1.9617	0.00334076	0.0680982	1	20	tags=12%, list=0%, signal=12%
RPC19_BIND	26	0.497848	1.96142	0.00840336	0.0680603	1	1952	tags=73%, list=31%, signal=106%
PEROXISOMAL MATRIX_CEL	24	0.500963	1.9591	0.00645161	0.0693046	1	977	tags=38%, list=16%, signal=44%
NOP1_BIND	130	0.382064	1.95692	0	0.0705197	1	1220	tags=43%, list=19%, signal=52%
XENOBIOTIC TRANSPORTER ACTIVITY_MOL	7	0.745606	1.95637	0.00399467	0.0705749	1	382	tags=43%, list=6%, signal=46%
GAL4_DN	147	0.370011	1.95622	0	0.0704385	1	2078	tags=54%, list=33%, signal=78%
OS(HOG1)_UP	79	0.401769	1.95591	0	0.0703964	1	1422	tags=34%, list=23%, signal=44%
LSG1_BIND	18	0.549519	1.9541	0.00438597	0.0713252	1	1449	tags=67%, list=23%, signal=86%
DBP2_BIND	28	0.48507	1.95294	0.00421496	0.0717555	1	2311	tags=79%, list=37%, signal=124%
UBIQUINOL-CYTOCHROME-C REDUCTASE COMPLEX_CEL	9	0.660019	1.9413	0.003663	0.0792944	1	1709	tags=89%, list=27%, signal=122%
OXIDOREDUCTASE ACTIVITY, ACTING ON DIPHENOLS AND RELATED SUBSTANCES AS DONORS, CYTOCHROME AS ACCEPTOR_MOL	8	0.708066	1.94122	0.00372208	0.0790828	1	800	tags=75%, list=13%, signal=86%
WHITE_UP	94	0.389998	1.93935	0	0.0801809	1	757	tags=22%, list=12%, signal=25%
MITOCHONDRIAL RESPIRATORY CHAIN COMPLEX III_CEL	9	0.660019	1.93722	0.00381679	0.0813319	1	1709	tags=89%, list=27%, signal=122%
DICARBOXYLIC ACID METABOLIC PROCESS_BIO	12	0.617245	1.9301	0.00572738	0.0864608	1	1024	tags=50%, list=16%, signal=60%
RPL30_BIND	55	0.417205	1.92848	0	0.0873272	1	867	tags=42%, list=14%, signal=48%
RPA190_BIND	30	0.477366	1.92825	0.00726895	0.0872537	1	2176	tags=73%, list=35%, signal=112%
PWY-5078_PATH	7	0.736635	1.9278	0.00649351	0.0872644	1	520	tags=29%, list=8%, signal=31%
UTP22_BIND	60	0.414153	1.9247	0	0.0894279	1	1148	tags=45%, list=18%, signal=55%
TRANSCRIPTION FROM RNA POLYMERASE I PROMOTER_BIO	30	0.476197	1.92389	0.00206398	0.0897569	1	2139	tags=73%, list=34%, signal=111%
NPL4_BIND	17	0.55913	1.92348	0.0111857	0.0897261	1	1975	tags=76%, list=31%, signal=111%
MITOCHONDRIAL ELECTRON TRANSPORT, UBIQUINOL TO CYTOCHROME C_BIO	9	0.660341	1.9225	0.00859951	0.0902079	1	1709	tags=89%, list=27%, signal=122%
OXIDOREDUCTASE ACTIVITY, OXIDIZING METAL IONS_MOL	22	0.506801	1.92098	0.00322581	0.0911082	1	20	tags=9%, list=0%, signal=9%
NUCLEOSIDE-TRIPHOSPHATASE ACTIVITY_MOL	184	0.355298	1.92092	0	0.0908663	1	2027	tags=52%, list=32%, signal=74%
METAL ION HOMEOSTASIS_BIO	54	0.423793	1.91982	0	0.0914869	1	1065	tags=31%, list=17%, signal=38%
RRP42_BIND	14	0.589863	1.91949	0.00806452	0.0914672	1	2251	tags=93%, list=36%, signal=144%
PEROXISOME_CEL	48	0.42705	1.91915	0.00302725	0.0914703	1	1444	tags=44%, list=23%, signal=56%
PUP3_BIND	18	0.541523	1.91863	0.00775194	0.0915577	1	2166	tags=83%, list=35%, signal=127%
RESPONSE TO REACTIVE OXYGEN SPECIES_BIO	6	0.752402	1.91802	0.00395778	0.0917416	1	785	tags=67%, list=13%, signal=76%
DNA-DIRECTED RNA POLYMERASE III COMPLEX_CEL	17	0.534129	1.9173	0.00978261	0.0920047	1	2423	tags=88%, list=39%, signal=143%
JJJ1_BIND	18	0.540775	1.91693	0.00441014	0.0919871	1	2011	tags=78%, list=32%, signal=114%
RGA2_BIND	20	0.519553	1.91648	0.00326087	0.0920462	1	1762	tags=70%, list=28%, signal=97%
RRP15_BIND	11	0.62792	1.91589	0.00696864	0.0921784	1	1611	tags=73%, list=26%, signal=98%
ATPASE ACTIVITY_MOL	148	0.369662	1.91523	0	0.0923859	1	2027	tags=53%, list=32%, signal=76%
CLA30_DN	82	0.393087	1.91521	0	0.0921071	1	1672	tags=46%, list=27%, signal=62%
RPS22B_BIND	35	0.44613	1.91473	0.0010395	0.0922062	1	2176	tags=66%, list=35%, signal=100%
UBIQUINOL-CYTOCHROME-C REDUCTASE ACTIVITY_MOL	8	0.708066	1.91395	0.00497512	0.0925407	1	800	tags=75%, list=13%, signal=86%
RESPIRATORY CHAIN COMPLEX III_CEL	9	0.660019	1.91295	0.0100629	0.0931183	1	1709	tags=89%, list=27%, signal=122%
RRP46_BIND	15	0.571573	1.91188	0.00446429	0.0937363	1	2251	tags=87%, list=36%, signal=135%
NUCLEAR LUMEN_CEL	308	0.342434	1.91105	0	0.0940506	1	2790	tags=68%, list=44%, signal=116%
AIR1_BIND	38	0.455549	1.90968	0.00309278	0.0948604	1	1068	tags=47%, list=17%, signal=57%
PTM1_BIND	10	0.646066	1.90962	0.013382	0.0946173	1	1794	tags=90%, list=29%, signal=126%
DBP3_BIND	52	0.422863	1.90957	0	0.0943539	1	1569	tags=56%, list=25%, signal=74%
PDX1_BIND	16	0.552688	1.90957	0.00793651	0.0940645	1	1513	tags=63%, list=24%, signal=82%
TIF1_BIND	67	0.404554	1.90741	0.00200401	0.09555	1	2262	tags=63%, list=36%, signal=97%
COFACTOR METABOLIC PROCESS_BIO	113	0.379536	1.90626	0	0.0962271	1	908	tags=28%, list=14%, signal=33%
ATPASE ACTIVITY, COUPLED_MOL	107	0.376671	1.90228	0.002	0.099205	1	1566	tags=43%, list=25%, signal=56%
RPA43_BIND	20	0.523922	1.89939	0.00664452	0.101274	1	1739	tags=70%, list=28%, signal=97%
CICLOPIROX_OLAMINE_UP	44	0.430617	1.89922	0.0061287	0.10115	1	339	tags=14%, list=5%, signal=14%
FERMENTATION_BIO	13	0.58188	1.89808	0.00699301	0.101799	1	802	tags=31%, list=13%, signal=35%
MICROBODY_CEL	48	0.42705	1.89717	0.00708502	0.102338	1	1444	tags=44%, list=23%, signal=56%
RPN13_BIND	36	0.454692	1.89579	0.00309278	0.103174	1	1636	tags=61%, list=26%, signal=82%
MONOVALENT INORGANIC CATION TRANSPORTER ACTIVITY_MOL	32	0.466758	1.89574	0.00315457	0.102902	1	1061	tags=47%, list=17%, signal=56%
PRE1_BIND	35	0.453066	1.89491	0.00205128	0.103272	1	2921	tags=89%, list=47%, signal=165%
GLUTAMATE BIOSYNTHETIC PROCESS_BIO	11	0.62546	1.89465	0.00477897	0.103186	1	606	tags=45%, list=10%, signal=50%
ENDOPEPTIDASE ACTIVITY_MOL	56	0.413012	1.89397	0.00101215	0.103473	1	2373	tags=66%, list=38%, signal=105%
TSR1_BIND	18	0.523516	1.89083	0.010101	0.105806	1	2469	tags=83%, list=39%, signal=137%
CARBON-CARBON LYASE ACTIVITY_MOL	17	0.54447	1.89029	0.00672646	0.105989	1	558	tags=24%, list=9%, signal=26%
ECM29_BIND	40	0.442415	1.88504	0.00712831	0.110186	1	1522	tags=58%, list=24%, signal=75%
ENERGY DERIVATION BY OXIDATION OF ORGANIC COMPOUNDS_BIO	102	0.377456	1.88473	0	0.110128	1	1769	tags=41%, list=28%, signal=56%
RPL11A_BIND	24	0.491695	1.87793	0.00535332	0.115933	1	1928	tags=71%, list=31%, signal=102%
TRPSYN_PATH	5	0.804364	1.87741	0	0.116025	1	558	tags=80%, list=9%, signal=88%
RPL15A_BIND	41	0.431663	1.87737	0.00408998	0.115729	1	2176	tags=66%, list=35%, signal=100%
LEUCINE METABOLIC PROCESS_BIO	7	0.722568	1.87716	0.00770218	0.115616	1	0	tags=14%, list=0%, signal=14%
PYC2_BIND	38	0.441511	1.87691	0.00205973	0.115535	1	2009	tags=63%, list=32%, signal=92%
MITOCHONDRIAL MEMBRANE PART_CEL	44	0.42744	1.87621	0.00717949	0.115904	1	1919	tags=57%, list=31%, signal=81%
SNQ2_BIND	11	0.610137	1.87443	0.00723764	0.117222	1	1306	tags=64%, list=21%, signal=80%
PURINE NUCLEOTIDE METABOLIC PROCESS_BIO	22	0.498728	1.87239	0.0075594	0.118805	1	1061	tags=41%, list=17%, signal=49%
RNA BINDING_MOL	109	0.371222	1.87132	0	0.119474	1	1915	tags=57%, list=31%, signal=80%
GIT1_BIND	5	0.78205	1.87073	0.00824176	0.119637	1	109	tags=40%, list=2%, signal=41%
ARR3_BIND	6	0.747818	1.87038	0.00534045	0.119657	1	764	tags=67%, list=12%, signal=76%
AMINO ACID BIOSYNTHETIC PROCESS_BIO	92	0.375853	1.86941	0	0.120225	1	794	tags=30%, list=13%, signal=34%
RHB1_SGA	84	0.377025	1.86901	0.001001	0.120251	1	1724	tags=49%, list=27%, signal=66%
RRP40_BIND	13	0.585659	1.86811	0.00829384	0.120754	1	2251	tags=92%, list=36%, signal=144%
PWP2_BIND	19	0.509923	1.8664	0.00975081	0.122017	1	2164	tags=79%, list=34%, signal=120%
ACH1_BIND	23	0.482525	1.86453	0.0150054	0.123234	1	1698	tags=61%, list=27%, signal=83%
HSP82_BIND	43	0.419707	1.86424	0.00204499	0.123165	1	2169	tags=60%, list=35%, signal=92%
SLS1_BIND	30	0.460739	1.86323	0.00731452	0.123825	1	2286	tags=73%, list=36%, signal=115%
YBR141C_BIND	22	0.497207	1.86216	0.00861141	0.124418	1	1130	tags=41%, list=18%, signal=50%
PWY3O-4108_PATH	5	0.795803	1.86105	0.00412088	0.125212	1	510	tags=40%, list=8%, signal=44%
MDH1_BIND	27	0.470323	1.85957	0.00945378	0.12636	1	1069	tags=44%, list=17%, signal=53%
RPL25_BIND	72	0.388205	1.8595	0	0.126054	1	2935	tags=78%, list=47%, signal=144%
LYS4_BIND	6	0.740068	1.85785	0.00394218	0.127322	1	300	tags=50%, list=5%, signal=52%
DBP3_SGA	41	0.429024	1.85565	0.00306122	0.129215	1	2246	tags=68%, list=36%, signal=106%
RPT4_BIND	42	0.429345	1.8545	0.00708502	0.130049	1	2373	tags=74%, list=38%, signal=118%
RIO1_BIND	8	0.674069	1.85376	0.00998752	0.130394	1	867	tags=75%, list=14%, signal=87%
LIPID TRANSPORT_BIO	16	0.533058	1.85342	0.00571429	0.130401	1	746	tags=38%, list=12%, signal=42%
POL5_BIND	17	0.533744	1.85288	0.00673401	0.13058	1	1352	tags=65%, list=22%, signal=82%
KRI1_BIND	28	0.461531	1.85286	0.00312826	0.130253	1	2270	tags=71%, list=36%, signal=111%
GTS1_BIND	16	0.532465	1.85186	0.00678733	0.130896	1	1276	tags=50%, list=20%, signal=63%
METAL ION TRANSPORT_BIO	55	0.39805	1.85156	0.00506073	0.130866	1	1414	tags=36%, list=23%, signal=47%
RPL19A_BIND	13	0.570704	1.85128	0.0117786	0.130785	1	2176	tags=85%, list=35%, signal=129%
OS(2006)_UP	194	0.347582	1.84712	0	0.134684	1	755	tags=18%, list=12%, signal=20%
UTP4_BIND	43	0.423049	1.84645	0.00510204	0.135001	1	1080	tags=47%, list=17%, signal=56%
RNA METHYLTRANSFERASE ACTIVITY_MOL	15	0.541682	1.84477	0.0168729	0.136435	1	2631	tags=93%, list=42%, signal=160%
TEC1_TF	15	0.550279	1.84239	0.0114416	0.13844	1	417	tags=33%, list=7%, signal=36%
NCA2_SGA	22	0.479345	1.84081	0.0109409	0.139742	1	2131	tags=68%, list=34%, signal=103%
RPN1_BIND	56	0.396416	1.84067	0.0020141	0.139527	1	2923	tags=79%, list=47%, signal=146%
EPT1_SGA	49	0.406251	1.83851	0.0030303	0.1415	1	2182	tags=59%, list=35%, signal=90%
DIS3_BIND	21	0.483016	1.83803	0.0110011	0.141651	1	2251	tags=76%, list=36%, signal=118%
GAL4_UP	251	0.334707	1.83769	0	0.141599	1	1146	tags=27%, list=18%, signal=31%
ESF2_BIND	8	0.653439	1.83719	0.0075662	0.141771	1	1080	tags=75%, list=17%, signal=90%
RPS17A_BIND	27	0.463159	1.83687	0.00833333	0.141721	1	2176	tags=67%, list=35%, signal=102%
NHP2_BIND	17	0.522149	1.83254	0.0132743	0.145949	1	2405	tags=82%, list=38%, signal=133%
TRX2_BIND	14	0.558184	1.83212	0.0170843	0.146006	1	607	tags=50%, list=10%, signal=55%
HYDROGEN ION TRANSPORTER ACTIVITY_MOL	29	0.448249	1.82687	0.0104932	0.151379	1	1061	tags=45%, list=17%, signal=54%
ADE17_BIND	23	0.484331	1.82511	0.00751073	0.153018	1	1311	tags=43%, list=21%, signal=55%
FET4_BIND	18	0.512213	1.82394	0.012987	0.153958	1	1521	tags=61%, list=24%, signal=80%
NITROGEN COMPOUND BIOSYNTHETIC PROCESS_BIO	95	0.365559	1.82184	0.001001	0.155892	1	794	tags=29%, list=13%, signal=33%
IMP3_BIND	21	0.489913	1.82177	0.00961539	0.155589	1	2164	tags=76%, list=34%, signal=116%
GCN1_SGA	75	0.380108	1.82054	0.00200401	0.156597	1	2032	tags=55%, list=32%, signal=80%
YBP2_SGA	34	0.431729	1.82035	0.00823893	0.156409	1	717	tags=35%, list=11%, signal=40%
PDR12_BIND	27	0.450762	1.81571	0.0126316	0.161345	1	1449	tags=44%, list=23%, signal=58%
RRN3_BIND	6	0.734543	1.81545	0.00539811	0.161204	1	723	tags=67%, list=12%, signal=75%
AMINE BIOSYNTHETIC PROCESS_BIO	95	0.365559	1.81401	0.001001	0.16256	1	794	tags=29%, list=13%, signal=33%
YMR31_BIND	9	0.624911	1.81324	0.0154394	0.162977	1	1915	tags=89%, list=31%, signal=128%
RPS7A_BIND	72	0.389524	1.81246	0.002002	0.163435	1	2469	tags=68%, list=39%, signal=111%
SNU13_BIND	27	0.454575	1.81158	0.0138151	0.164164	1	1091	tags=44%, list=17%, signal=54%
OS_UP	169	0.342841	1.81116	0	0.164209	1	1015	tags=24%, list=16%, signal=27%
REE1_BIND	9	0.625545	1.81031	0.0196802	0.1647	1	1915	tags=89%, list=31%, signal=128%
RPL22A_BIND	40	0.420919	1.80927	0.00205761	0.16555	1	2264	tags=68%, list=36%, signal=105%
RNA HELICASE ACTIVITY_MOL	36	0.436514	1.80799	0.011213	0.166648	1	1547	tags=58%, list=25%, signal=77%
RPA135_BIND	43	0.408795	1.80577	0.00711382	0.168889	1	2423	tags=67%, list=39%, signal=109%
ELECTRON TRANSPORT_BIO	18	0.506187	1.80432	0.0146067	0.170156	1	1709	tags=61%, list=27%, signal=84%
UPF3_BIND	57	0.391601	1.80329	0.00509684	0.171034	1	2236	tags=63%, list=36%, signal=97%
RPS13_BIND	42	0.41866	1.80089	0.00511247	0.173684	1	2365	tags=69%, list=38%, signal=110%
GSP1_BIND	33	0.429812	1.79891	0.016546	0.175694	1	2244	tags=70%, list=36%, signal=108%
RFX1P_TFMOTIF	70	0.380543	1.79868	0.001002	0.175589	1	1629	tags=43%, list=26%, signal=57%
ISA2_BIND	11	0.57955	1.79814	0.0132212	0.175883	1	1915	tags=82%, list=31%, signal=118%
SQT1_BIND	6	0.711005	1.79732	0.0222805	0.176541	1	1817	tags=100%, list=29%, signal=141%
REX4_BIND	7	0.665738	1.79721	0.0138539	0.176224	1	1446	tags=86%, list=23%, signal=111%
RPL1A_BIND	45	0.402889	1.79703	0.00614125	0.176029	1	2935	tags=80%, list=47%, signal=149%
NUS1_BIND	17	0.510541	1.79677	0.0133185	0.175885	1	1926	tags=65%, list=31%, signal=93%
MULTIDRUG TRANSPORTER ACTIVITY_MOL	11	0.571311	1.79397	0.0168472	0.179103	1	382	tags=27%, list=6%, signal=29%
IRON ION TRANSPORT_BIO	25	0.463811	1.79329	0.00860215	0.179618	1	1109	tags=32%, list=18%, signal=39%
COFACTOR BIOSYNTHETIC PROCESS_BIO	47	0.410205	1.78896	0.00303337	0.184633	1	443	tags=23%, list=7%, signal=25%
YJL016W_BIND	13	0.542047	1.78693	0.0105018	0.186763	1	2308	tags=85%, list=37%, signal=134%
PYROPHOSPHATASE ACTIVITY_MOL	198	0.333011	1.78638	0	0.187153	1	2027	tags=49%, list=32%, signal=70%
PGI1-2_SGA	13	0.543239	1.78535	0.0195402	0.188034	1	1023	tags=54%, list=16%, signal=64%
LPD1_BIND	12	0.558752	1.78491	0.0213018	0.188124	1	1042	tags=58%, list=17%, signal=70%
CLU1_BIND	42	0.414258	1.78446	0.00511247	0.188273	1	2923	tags=81%, list=47%, signal=151%
TRANSCRIPTION FROM RNA POLYMERASE III PROMOTER_BIO	32	0.42788	1.78247	0.0103199	0.190429	1	2964	tags=84%, list=47%, signal=159%
ANION TRANSPORT_BIO	16	0.519305	1.78157	0.0191441	0.19117	1	1049	tags=44%, list=17%, signal=52%
ZAP1_DN	265	0.324159	1.78107	0	0.191339	1	1504	tags=31%, list=24%, signal=39%
HYDROLASE ACTIVITY, ACTING ON ACID ANHYDRIDES, IN PHOSPHORUS-CONTAINING ANHYDRIDES_MOL	198	0.333011	1.78014	0	0.192115	1	2027	tags=49%, list=32%, signal=70%
PROTEIN FOLDING_BIO	44	0.413579	1.78008	0.00923077	0.191765	1	2678	tags=75%, list=43%, signal=130%
ION TRANSPORTER ACTIVITY_MOL	97	0.359802	1.77954	0	0.192041	1	1061	tags=33%, list=17%, signal=39%
CUP2P_TFMOTIF	84	0.360675	1.77911	0	0.192186	1	569	tags=21%, list=9%, signal=23%
ILV6_BIND	15	0.535636	1.77865	0.0178771	0.192348	1	2176	tags=80%, list=35%, signal=122%
ACH1_SGA	85	0.365522	1.77843	0.002002	0.192173	1	1679	tags=46%, list=27%, signal=62%
HYDROLASE ACTIVITY, ACTING ON ACID ANHYDRIDES_MOL	198	0.333011	1.77786	0	0.192569	1	2027	tags=49%, list=32%, signal=70%
STL1_SGA	39	0.417126	1.77776	0.00917431	0.192253	1	378	tags=26%, list=6%, signal=27%
UTP7_BIND	21	0.478684	1.77696	0.012973	0.192733	1	1021	tags=52%, list=16%, signal=62%
NOP10_BIND	9	0.611797	1.77458	0.0256098	0.195529	1	1984	tags=89%, list=32%, signal=130%
ESF1_BIND	10	0.595769	1.77363	0.00962696	0.196392	1	422	tags=50%, list=7%, signal=54%
MICROBODY PART_CEL	33	0.426676	1.77264	0.0134436	0.197249	1	977	tags=33%, list=16%, signal=39%
UBA3_SGA	32	0.426957	1.77255	0.00927835	0.196866	1	821	tags=34%, list=13%, signal=39%
RPS16A_BIND	45	0.398083	1.77101	0.00808898	0.198566	1	1551	tags=49%, list=25%, signal=64%
CDC37_BIND	20	0.487052	1.77027	0.0174673	0.199118	1	2847	tags=90%, list=45%, signal=164%
CAP2_DN	304	0.318989	1.76906	0	0.200207	1	952	tags=23%, list=15%, signal=25%
ORGANELLE ATP SYNTHESIS COUPLED ELECTRON TRANSPORT_BIO	14	0.531132	1.76709	0.0212766	0.202445	1	1709	tags=64%, list=27%, signal=88%
ORGANIC ACID METABOLIC PROCESS_BIO	260	0.320542	1.76692	0	0.202242	1	977	tags=26%, list=16%, signal=29%
PEROXISOMAL PART_CEL	33	0.426676	1.76674	0.00720906	0.202034	1	977	tags=33%, list=16%, signal=39%
MODIFICATION-DEPENDENT PROTEIN CATABOLIC PROCESS_BIO	68	0.369428	1.76613	0.00704225	0.202467	1	2847	tags=72%, list=45%, signal=130%
INORGANIC ANION TRANSPORTER ACTIVITY_MOL	14	0.535628	1.76602	0.0206659	0.202167	1	1049	tags=43%, list=17%, signal=51%
SKI6_BIND	25	0.44091	1.76459	0.00847458	0.203653	1	2535	tags=76%, list=40%, signal=127%
RPS8A_BIND	131	0.342768	1.76321	0	0.205196	1	1147	tags=38%, list=18%, signal=46%
NUCLEAR EXOSOME (RNASE COMPLEX)_CEL	11	0.575392	1.76288	0.0197445	0.205202	1	2251	tags=91%, list=36%, signal=142%
GAL4_TF	100	0.348742	1.76288	0	0.204751	1	654	tags=16%, list=10%, signal=18%
DRUG TRANSPORTER ACTIVITY_MOL	11	0.571311	1.76284	0.0204082	0.204332	1	382	tags=27%, list=6%, signal=29%
PROTEOLYSIS_BIO	92	0.358009	1.7628	0.00200401	0.203947	1	2847	tags=70%, list=45%, signal=125%
HAP2_BIND	28	0.443279	1.76068	0.0105374	0.20638	1	1915	tags=64%, list=31%, signal=92%
CDC35_YEAST_DN	268	0.318505	1.76052	0	0.206123	1	1826	tags=42%, list=29%, signal=56%
LYASE ACTIVITY_MOL	68	0.372843	1.76043	0.00702106	0.205783	1	1862	tags=44%, list=30%, signal=62%
TRM7_BIND	20	0.471236	1.75988	0.0204082	0.20608	1	2355	tags=75%, list=38%, signal=120%
ARGININE BIOSYNTHETIC PROCESS_BIO	8	0.631514	1.75932	0.0216837	0.20639	1	1389	tags=75%, list=22%, signal=96%
RNA PROCESSING_BIO	226	0.325064	1.75908	0	0.206266	1	2584	tags=62%, list=41%, signal=102%
NOP14_BIND	31	0.428229	1.75759	0.0155763	0.207946	1	2164	tags=65%, list=34%, signal=98%
RESPONSE TO METAL ION_BIO	11	0.574431	1.75678	0.0225386	0.208632	1	1506	tags=64%, list=24%, signal=84%
ASP3-4_SGA	16	0.510204	1.75648	0.0242558	0.208598	1	484	tags=31%, list=8%, signal=34%
CARBOXYLIC ACID METABOLIC PROCESS_BIO	260	0.320542	1.75609	0	0.208683	1	977	tags=26%, list=16%, signal=29%
MITOCHONDRIAL INNER MEMBRANE_CEL	104	0.352602	1.75596	0	0.208418	1	1964	tags=48%, list=31%, signal=69%
IRON ASSIMILATION_BIO	12	0.553606	1.75537	0.0282353	0.208804	1	1065	tags=33%, list=17%, signal=40%
REE1_SGA	19	0.485893	1.75523	0.014333	0.208546	1	2123	tags=74%, list=34%, signal=111%
RPC40_BIND	41	0.398012	1.75485	0.0152284	0.208663	1	1664	tags=54%, list=27%, signal=73%
PROTEOLYSIS INVOLVED IN CELLULAR PROTEIN CATABOLIC PROCESS_BIO	69	0.371861	1.75444	0.00302419	0.208827	1	2847	tags=72%, list=45%, signal=131%
RRP8_BIND	56	0.37957	1.75239	0.0100705	0.211184	1	2407	tags=64%, list=38%, signal=103%
COT1_BIND	13	0.551261	1.75237	0.0116144	0.210775	1	1874	tags=77%, list=30%, signal=109%
SSF2_BIND	20	0.482164	1.75214	0.0250545	0.210605	1	2034	tags=70%, list=32%, signal=103%
URA8_BIND	6	0.69005	1.75178	0.0217391	0.210623	1	1650	tags=83%, list=26%, signal=113%
GCY1_BIND	9	0.602863	1.75177	0.0207824	0.210189	1	1118	tags=44%, list=18%, signal=54%
ATP SYNTHESIS COUPLED ELECTRON TRANSPORT_BIO	14	0.531132	1.75007	0.0216895	0.212195	1	1709	tags=64%, list=27%, signal=88%
ASP1_BIND	13	0.547342	1.7492	0.0211516	0.212904	1	2847	tags=100%, list=45%, signal=183%
EXOSOME (RNASE COMPLEX)_CEL	11	0.575392	1.74835	0.0120773	0.213727	1	2251	tags=91%, list=36%, signal=142%
CCAAT-BINDING FACTOR COMPLEX_CEL	5	0.73497	1.7482	0.0192044	0.213482	1	1666	tags=100%, list=27%, signal=136%
ATPASE ACTIVITY, COUPLED TO TRANSMEMBRANE MOVEMENT OF IONS_MOL	27	0.442681	1.74745	0.0169851	0.214109	1	1061	tags=41%, list=17%, signal=49%
MODIFICATION-DEPENDENT MACROMOLECULE CATABOLIC PROCESS_BIO	68	0.369428	1.7472	0.001001	0.213956	1	2847	tags=72%, list=45%, signal=130%
CHAPERONE BINDING_MOL	9	0.604914	1.74702	0.0172839	0.213787	1	2091	tags=89%, list=33%, signal=133%
GCD2_DAMP_SGA	41	0.39562	1.74638	0.0152905	0.214225	1	2198	tags=66%, list=35%, signal=101%
BUD20_BIND	8	0.62049	1.74638	0.0273973	0.213781	1	1068	tags=63%, list=17%, signal=75%
UBIQUITIN-DEPENDENT PROTEIN CATABOLIC PROCESS_BIO	68	0.369428	1.74611	0.00800801	0.21374	1	2847	tags=72%, list=45%, signal=130%
IRON ASSIMILATION BY CHELATION AND TRANSPORT_BIO	12	0.553606	1.74573	0.0237248	0.213834	1	1065	tags=33%, list=17%, signal=40%
BRANCHED CHAIN FAMILY AMINO ACID METABOLIC PROCESS_BIO	15	0.511147	1.74499	0.027088	0.214391	1	0	tags=7%, list=0%, signal=7%
SSB1_SGA	43	0.398055	1.74468	0.00912779	0.214428	1	2270	tags=63%, list=36%, signal=98%
RPS4A_BIND	71	0.367747	1.74459	0.00200803	0.214101	1	2467	tags=65%, list=39%, signal=106%
INTRACELLULAR COPPER ION TRANSPORT_BIO	5	0.74074	1.74429	0.0146862	0.214076	1	586	tags=60%, list=9%, signal=66%
RRP17_BIND	6	0.692666	1.74236	0.0171504	0.216328	1	927	tags=67%, list=15%, signal=78%
MITOCHONDRIAL MEMBRANE_CEL	120	0.338889	1.74057	0.003003	0.218424	1	2171	tags=51%, list=35%, signal=76%
AMINOPHOSPHOLIPID TRANSPORTER ACTIVITY_MOL	9	0.604204	1.73967	0.0232843	0.219215	1	959	tags=56%, list=15%, signal=65%
YML053C_BIND	5	0.71298	1.73913	0.021419	0.219613	1	49	tags=40%, list=1%, signal=40%
PIH1_BIND	55	0.380208	1.73907	0.00507099	0.219276	1	2640	tags=69%, list=42%, signal=118%
UBA3_BIND	39	0.405992	1.73785	0.0153689	0.220626	1	2454	tags=64%, list=39%, signal=105%
XS(2006)_DN	446	0.306823	1.73751	0	0.220669	1	2044	tags=48%, list=33%, signal=65%
RPC31_BIND	19	0.475315	1.73667	0.0241758	0.221343	1	1952	tags=68%, list=31%, signal=99%
FATTY ACID TRANSPORT_BIO	6	0.690497	1.73484	0.0209699	0.223602	1	377	tags=50%, list=6%, signal=53%
SSF1_BIND	79	0.356786	1.73473	0.00701403	0.223311	1	1543	tags=44%, list=25%, signal=58%
RPL18A_BIND	22	0.463442	1.73412	0.0174482	0.22374	1	1449	tags=59%, list=23%, signal=77%
TEL2_BIND	6	0.695375	1.73376	0.0218229	0.223829	1	1915	tags=100%, list=31%, signal=144%
TRM9_SGA	44	0.400734	1.73315	0.00715746	0.224345	1	2320	tags=61%, list=37%, signal=97%
PRIMARY ACTIVE TRANSPORTER ACTIVITY_MOL	27	0.442681	1.73287	0.0159744	0.224308	1	1061	tags=41%, list=17%, signal=49%
SIDEROPHORE-IRON TRANSPORT_BIO	12	0.553606	1.73279	0.0253749	0.223988	1	1065	tags=33%, list=17%, signal=40%
PSEUDOURIDYLATE SYNTHASE ACTIVITY_MOL	5	0.727336	1.73278	0.0110957	0.223566	1	762	tags=80%, list=12%, signal=91%
LTV1_BIND	57	0.373235	1.73264	0.0131048	0.223326	1	1604	tags=51%, list=26%, signal=68%
PHOSPHOLIPID-TRANSLOCATING ATPASE ACTIVITY_MOL	9	0.604204	1.73038	0.0295931	0.226124	1	959	tags=56%, list=15%, signal=65%
RTT10_BIND	13	0.537828	1.72937	0.0254042	0.227154	1	1291	tags=54%, list=21%, signal=68%
ENP1-1_SGA	43	0.384081	1.72921	0.0163432	0.22696	1	1449	tags=44%, list=23%, signal=57%
ATF1_BIND	6	0.679356	1.72808	0.0233766	0.228208	1	10	tags=17%, list=0%, signal=17%
P-P-BOND-HYDROLYSIS-DRIVEN TRANSPORTER ACTIVITY_MOL	27	0.442681	1.72741	0.0146905	0.228718	1	1061	tags=41%, list=17%, signal=49%
PWY-3781_PATH	23	0.457774	1.72527	0.0256959	0.231494	1	1919	tags=65%, list=31%, signal=94%
RRP4_BIND	19	0.484528	1.7242	0.0197368	0.232763	1	2251	tags=79%, list=36%, signal=123%
ENDOSOME TRANSPORT_BIO	29	0.423194	1.72338	0.0166147	0.233574	1	3074	tags=86%, list=49%, signal=168%
MONOSACCHARIDE BIOSYNTHETIC PROCESS_BIO	14	0.515858	1.72254	0.0251716	0.234485	1	81	tags=14%, list=1%, signal=14%
PDR5_BIND	20	0.46902	1.7225	0.014333	0.23409	1	1313	tags=45%, list=21%, signal=57%
SIDEROPHORE TRANSPORT_BIO	12	0.553606	1.72222	0.0306966	0.234033	1	1065	tags=33%, list=17%, signal=40%
BFR2_BIND	21	0.476176	1.72219	0.0283224	0.233649	1	867	tags=48%, list=14%, signal=55%
ORGANELLE INNER MEMBRANE_CEL	108	0.343932	1.72218	0.002	0.233213	1	2171	tags=51%, list=35%, signal=77%
HEXOSE BIOSYNTHETIC PROCESS_BIO	14	0.515858	1.72152	0.0223964	0.233716	1	81	tags=14%, list=1%, signal=14%
PHO13_BIND	24	0.443188	1.71887	0.0301075	0.237298	1	3040	tags=88%, list=48%, signal=169%
DBP7_BIND	75	0.361416	1.71785	0.00501505	0.238527	1	2248	tags=57%, list=36%, signal=88%
RPB8_BIND	42	0.394102	1.71663	0.0103627	0.240058	1	2493	tags=71%, list=40%, signal=118%
CTT1_BIND	7	0.648973	1.71522	0.0194553	0.241709	1	629	tags=43%, list=10%, signal=48%
FUN12_BIND	24	0.445525	1.71483	0.0183387	0.241825	1	2284	tags=75%, list=36%, signal=117%
IPI1_BIND	11	0.565678	1.71314	0.0251799	0.243802	1	2010	tags=82%, list=32%, signal=120%
YMR310C_BIND	9	0.605712	1.71309	0.0348259	0.243402	1	2479	tags=100%, list=39%, signal=165%
DBP6_BIND	8	0.607371	1.71267	0.0224719	0.243584	1	1984	tags=88%, list=32%, signal=128%
DOG1_BIND	11	0.545116	1.71076	0.0192539	0.246058	1	1930	tags=73%, list=31%, signal=105%
NPA3_BIND	11	0.547167	1.71007	0.0364706	0.24666	1	2847	tags=100%, list=45%, signal=183%
DI-, TRI-VALENT INORGANIC CATION TRANSPORT_BIO	37	0.406196	1.70954	0.0123457	0.246989	1	1227	tags=32%, list=20%, signal=40%
MITOCHONDRIAL ENVELOPE_CEL	148	0.326974	1.70806	0.001	0.248811	1	2126	tags=49%, list=34%, signal=72%
RPN9_BIND	31	0.419611	1.70692	0.0165631	0.250121	1	3040	tags=84%, list=48%, signal=162%
PST2_SGA	29	0.423465	1.70671	0.0181044	0.24999	1	678	tags=24%, list=11%, signal=27%

## Sheet: C13 Downregulated
Gene sets downregulated after 20 min of treatment with compound 13
NAME	SIZE	ES	NES	NOM p-val	FDR q-val	FWER p-val	RANK AT MAX	LEADING EDGE
MITOCHONDRIAL RIBOSOME_CEL	63	-0.300812	-3.14097	0	0	0	3265	tags=86%, list=52%, signal=177%
TREHALOSE METABOLIC PROCESS_BIO	6	-0.948166	-2.95052	0	0.000474293	0.001	332	tags=100%, list=5%, signal=105%
TSA1_DN	10	-0.796521	-2.88797	0	0.000617297	0.002	1286	tags=100%, list=20%, signal=126%
ORGANELLAR RIBOSOME_CEL	63	-0.300812	-2.69435	0	0.00308257	0.012	3265	tags=86%, list=52%, signal=177%
MITOCHONDRIAL LARGE RIBOSOMAL SUBUNIT_CEL	36	-0.329671	-2.54174	0	0.0106623	0.054	2920	tags=83%, list=47%, signal=155%
ORGANELLAR LARGE RIBOSOMAL SUBUNIT_CEL	36	-0.329671	-2.26219	0	0.0952106	0.442	2920	tags=83%, list=47%, signal=155%
PWY3B3-3_PATH	20	-0.413156	-2.23238	0	0.103247	0.521	3116	tags=95%, list=50%, signal=188%
PWY-842_PATH	6	-0.726316	-2.17938	0	0.134698	0.659	1723	tags=100%, list=27%, signal=138%
MRP51_BIND	35	-0.298399	-2.10821	0	0.192182	0.829	3868	tags=94%, list=62%, signal=244%
ALPHA-GLUCOSIDASE ACTIVITY_MOL	5	-0.7262	-2.0871	0.00390625	0.201016	0.872	1723	tags=100%, list=27%, signal=138%
NADSYN_PATH	10	-0.536068	-2.03791	0	0.249051	0.946	2918	tags=100%, list=46%, signal=187%

## Sheet: C33 Upregulated
Gene sets upregulated after 20 min of treatment with compound 33
NAME	SIZE	ES	NES	NOM p-val	FDR q-val	FWER p-val	RANK AT MAX	LEADING EDGE
PROTEASOME COMPLEX (SENSU EUKARYOTA)_CEL	43	0.781357	2.82281	0	0	0	879	tags=79%, list=14%, signal=91%
PROTEASOME CORE COMPLEX (SENSU EUKARYOTA)_CEL	15	0.871488	2.62917	0	0	0	842	tags=100%, list=13%, signal=115%
PROTEASOME REGULATORY PARTICLE (SENSU EUKARYOTA)_CEL	21	0.830114	2.59081	0	0	0	879	tags=90%, list=14%, signal=104%
CD_UP	107	0.645661	2.57745	0	0	0	1168	tags=56%, list=18%, signal=67%
CD(HOG1)_UP	72	0.664501	2.53837	0	0	0	1168	tags=65%, list=18%, signal=79%
NAS6_BIND	21	0.775806	2.48228	0	0.000477047	0.003	879	tags=81%, list=14%, signal=93%
PROTEIN FOLDING_BIO	50	0.674181	2.46617	0	0.000818314	0.006	1069	tags=60%, list=17%, signal=71%
PROTEOLYSIS INVOLVED IN CELLULAR PROTEIN CATABOLIC PROCESS_BIO	70	0.642355	2.44437	0	0.00178849	0.015	879	tags=59%, list=14%, signal=67%
MODIFICATION-DEPENDENT MACROMOLECULE CATABOLIC PROCESS_BIO	69	0.638844	2.44187	0	0.00158976	0.015	879	tags=58%, list=14%, signal=66%
MODIFICATION-DEPENDENT PROTEIN CATABOLIC PROCESS_BIO	69	0.638844	2.44098	0	0.00143079	0.015	879	tags=58%, list=14%, signal=66%
UBIQUITIN-DEPENDENT PROTEIN CATABOLIC PROCESS_BIO	69	0.638844	2.43409	0	0.00147359	0.017	879	tags=58%, list=14%, signal=66%
CELLULAR PROTEIN CATABOLIC PROCESS_BIO	78	0.622817	2.43325	0	0.00143014	0.018	923	tags=58%, list=14%, signal=66%
PROTEOLYSIS_BIO	93	0.616904	2.41083	0	0.00161327	0.022	1034	tags=56%, list=16%, signal=66%
RAS1_HYPHAE_UP	35	0.693098	2.40764	0	0.00156633	0.023	1067	tags=60%, list=17%, signal=71%
ECM29_BIND	41	0.659786	2.37388	0	0.00254301	0.04	879	tags=54%, list=14%, signal=62%
RAS1_YEAST_UP	68	0.617267	2.35765	0	0.003516	0.058	990	tags=47%, list=15%, signal=55%
HS_UP	162	0.570671	2.33466	0	0.00566346	0.097	1564	tags=51%, list=24%, signal=65%
ENDOPEPTIDASE ACTIVITY_MOL	58	0.625974	2.32774	0	0.00619505	0.112	1003	tags=60%, list=16%, signal=71%
XS_UP	130	0.568243	2.30101	0	0.00983377	0.183	1037	tags=44%, list=16%, signal=51%
TAC1_DN	55	0.613705	2.2858	0	0.0122989	0.234	794	tags=44%, list=12%, signal=49%
ARGSYNBSUB_PATH	9	0.872672	2.27436	0	0.0138472	0.273	261	tags=67%, list=4%, signal=69%
SPG5_BIND	16	0.747408	2.26803	0	0.0143873	0.287	477	tags=69%, list=7%, signal=74%
PROTEIN CATABOLIC PROCESS_BIO	90	0.585835	2.26561	0	0.0144258	0.3	1003	tags=54%, list=16%, signal=64%
OS_UP	174	0.548445	2.26332	0	0.0146191	0.311	1055	tags=40%, list=16%, signal=47%
LATE BIOFILM_UP	61	0.607504	2.25295	0	0.0168544	0.361	915	tags=31%, list=14%, signal=36%
OS(HOG1)_UP	84	0.569723	2.24176	0	0.0198344	0.419	1273	tags=49%, list=20%, signal=60%
PROTEIN REFOLDING_BIO	14	0.766333	2.22921	0	0.0232668	0.478	1069	tags=79%, list=17%, signal=94%
ARGININE BIOSYNTHETIC PROCESS_BIO	8	0.857926	2.19061	0	0.0406479	0.699	261	tags=63%, list=4%, signal=65%
PEPTIDASE ACTIVITY_MOL	104	0.547898	2.16331	0	0.0594303	0.836	1272	tags=53%, list=20%, signal=65%
KETOCONAZOLE_UP	199	0.504897	2.10358	0	0.125139	0.98	840	tags=31%, list=13%, signal=35%
CDC53_UP	190	0.495472	2.06677	0	0.181159	0.998	1293	tags=38%, list=20%, signal=46%
CLA37_UP	155	0.504406	2.04838	0	0.209907	1	825	tags=30%, list=13%, signal=33%
GLUTAMINE FAMILY AMINO ACID BIOSYNTHETIC PROCESS_BIO	23	0.624704	2.02814	0.00103842	0.24616	1	261	tags=26%, list=4%, signal=27%
ADD66_BIND	16	0.672188	2.02275	0	0.249688	1	1743	tags=88%, list=27%, signal=120%

## Sheet: C33 Downregulated
Gene sets downregulated after 20 min of treatment with compound 33
NAME	SIZE	ES	NES	NOM p-val	FDR q-val	FWER p-val	RANK AT MAX	LEADING EDGE
MITOCHONDRIAL RESPIRATORY CHAIN_CEL	23	-0.563303	-3.06661	0	0	0	2167	tags=96%, list=34%, signal=143%
RPL42B_BIND	24	-0.527675	-2.98958	0	1.83637e-07	0.001	1236	tags=88%, list=19%, signal=108%
MITOCHONDRIAL LARGE RIBOSOMAL SUBUNIT_CEL	37	-0.360606	-2.80599	0	0.00090952	0.003	2276	tags=81%, list=35%, signal=124%
MRP7_BIND	26	-0.457847	-2.67431	0	0.00260604	0.01	3097	tags=96%, list=48%, signal=184%
RPS15_BIND	37	-0.354324	-2.64224	0	2.5887e-06	0.013	1813	tags=84%, list=28%, signal=116%
RPL7B_BIND	78	-0.26875	-2.63161	0	3.09888e-06	0.016	1813	tags=77%, list=28%, signal=106%
MITOCHONDRIAL RESPIRATORY CHAIN COMPLEX III_CEL	9	-0.713909	-2.4943	0	0.00622666	0.052	1855	tags=100%, list=29%, signal=140%
PNO1_BIND	27	-0.401572	-2.38746	0	2.85171e-05	0.127	1328	tags=78%, list=21%, signal=98%
RPL18B_BIND	44	-0.29991	-2.36991	0	0.0131826	0.144	1813	tags=80%, list=28%, signal=110%
RRP12_BIND	64	-0.231942	-2.25729	0	6.86851e-05	0.303	1417	tags=67%, list=22%, signal=85%
RIX1_BIND	28	-0.348836	-2.22961	0	0.0297458	0.365	2261	tags=86%, list=35%, signal=131%
RPS8B_BIND	29	-0.337207	-2.21585	0	9.55881e-05	0.399	1813	tags=79%, list=28%, signal=110%
MITOCHONDRIAL MEMBRANE PART_CEL	46	-0.339221	-2.1975	0	0.0330322	0.435	1981	tags=78%, list=31%, signal=112%
MITOCHONDRIAL RESPIRATORY CHAIN COMPLEX IV_CEL	8	-0.665426	-2.1745	0	0.0358561	0.496	2167	tags=100%, list=34%, signal=150%
RRP4_BIND	20	-0.40675	-2.17036	0	0.000136128	0.504	2362	tags=85%, list=37%, signal=134%
UTP15_BIND	42	-0.293381	-2.16222	0	0.0367557	0.531	1400	tags=69%, list=22%, signal=88%
MITOCHONDRIAL OUTER MEMBRANE TRANSLOCASE COMPLEX_CEL	6	-0.720552	-2.11981	0.00471698	0.0456169	0.628	1810	tags=100%, list=28%, signal=139%
UTP6_BIND	24	-0.379982	-2.0809	0	0.0551818	0.717	904	tags=71%, list=14%, signal=82%
CSR_DN	38	-0.298841	-2.06573	0	0.0571064	0.758	2869	tags=87%, list=44%, signal=155%
UTP20_BIND	36	-0.311531	-2.01934	0	0.0724982	0.861	1328	tags=72%, list=21%, signal=90%
HEME BIOSYNTHETIC PROCESS_BIO	12	-0.473162	-2.01545	0.0319149	0.0727662	0.871	3409	tags=100%, list=53%, signal=211%
DIM1_BIND	26	-0.340797	-1.99751	0	0.0793994	0.894	1824	tags=81%, list=28%, signal=112%
MITOCHONDRIAL ELECTRON TRANSPORT, UBIQUINOL TO CYTOCHROME C_BIO	9	-0.53258	-1.9337	0	0.112546	0.963	1855	tags=89%, list=29%, signal=125%
MRPL3_BIND	28	-0.307531	-1.93207	0.0555556	0.111579	0.965	3216	tags=89%, list=50%, signal=177%
ORGANELLE ATP SYNTHESIS COUPLED ELECTRON TRANSPORT_BIO	14	-0.439326	-1.91292	0.010989	0.117663	0.976	1855	tags=86%, list=29%, signal=120%
HEME METABOLIC PROCESS_BIO	12	-0.473162	-1.89899	0.0181818	0.122037	0.984	3409	tags=100%, list=53%, signal=211%
PURINE NUCLEOTIDE BIOSYNTHETIC PROCESS_BIO	23	-0.317988	-1.88506	0	0.129755	0.987	3848	tags=96%, list=60%, signal=236%
PURINE NUCLEOTIDE METABOLIC PROCESS_BIO	25	-0.322389	-1.86923	0	0.137153	0.992	3848	tags=96%, list=60%, signal=237%
MRPL23_BIND	21	-0.331343	-1.86816	0	0.135612	0.992	3097	tags=90%, list=48%, signal=173%
MRPL7_BIND	17	-0.393971	-1.84725	0.0149254	0.145023	0.995	3097	tags=94%, list=48%, signal=180%
CYTOKINESIS, COMPLETION OF SEPARATION_BIO	6	-0.613453	-1.84301	0.025	0.145635	0.995	2501	tags=100%, list=39%, signal=163%
RNA MODIFICATION_BIO	32	-0.262115	-1.8374	0	0.148021	0.996	1107	tags=63%, list=17%, signal=75%
MRPL4_BIND	26	-0.287805	-1.82424	0	0.156183	0.997	3097	tags=88%, list=48%, signal=169%
SLU7_BIND	11	-0.491236	-1.81817	0.00925926	0.159833	0.997	3292	tags=100%, list=51%, signal=204%
POM33_BIND	18	-0.383164	-1.81562	0	0.00140005	0.997	3279	tags=94%, list=51%, signal=191%
MRM2_BIND	31	-0.250381	-1.81062	0	0.164101	0.997	4463	tags=97%, list=69%, signal=312%
CWT1_EXPPHASE_UP	58	-0.218216	-1.80667	0	0.16541	0.997	1825	tags=74%, list=28%, signal=102%
PWP2_BIND	20	-0.336913	-1.80182	0	0.00151413	0.998	904	tags=65%, list=14%, signal=75%
NIP7_BIND	52	-0.177971	-1.79882	0	0.167759	0.998	1334	tags=63%, list=21%, signal=79%
RSM25_BIND	19	-0.34505	-1.78749	0.0172414	0.00153122	0.999	2117	tags=84%, list=33%, signal=125%
P121_PATH	8	-0.546977	-1.77157	0.00704225	0.191326	0.999	2931	tags=100%, list=45%, signal=183%
DIS3_DAMP_SGA	21	-0.327171	-1.7424	0	0.214141	1	4353	tags=100%, list=67%, signal=306%
RPH1_BIND	9	-0.494495	-1.74214	0.0149254	0.21145	1	3270	tags=100%, list=51%, signal=202%
PRP18_BIND	10	-0.463658	-1.73096	0.0230769	0.00221676	1	2257	tags=90%, list=35%, signal=138%
RRN3_BIND	6	-0.593924	-1.73079	0.0190476	0.00206735	1	2627	tags=100%, list=41%, signal=168%
PWY3B3-3_PATH	21	-0.340788	-1.72124	0.0285714	0.229864	1	3637	tags=95%, list=56%, signal=217%
GOLGI-ASSOCIATED VESICLE_CEL	40	-0.206429	-1.71503	0	0.23417	1	4584	tags=95%, list=71%, signal=325%
GRH1_BIND	11	-0.442842	-1.70964	0.038835	0.237631	1	3604	tags=100%, list=56%, signal=226%
PET123_BIND	24	-0.294363	-1.70712	0	0.00251009	1	2487	tags=83%, list=39%, signal=135%
RCL1_BIND	16	-0.366041	-1.70152	0.0123457	0.244892	1	1400	tags=75%, list=22%, signal=96%
UTP10_BIND	44	-0.21266	-1.69873	0	0.245327	1	5095	tags=100%, list=79%, signal=471%
RSM19_BIND	20	-0.317896	-1.69826	0.025641	0.00245334	1	1884	tags=75%, list=29%, signal=106%
